# Supplementary material for: Asymmetric β-arylation of cyclopropanols enabled by photoredox and nickel dual catalysis
Source: Royal Society of Chemistry journal article supplement (doi:10.1039/d1sc07237d), 2022-01-01
Supplement: d1sc07237d1.pdf [file d1sc07237d1.pdf]

# **Asymmetric $\beta$ -arylation of cyclopropanols enabled by photoredox and nickel dual catalysis**

Jianhua Wang, Xiaoxun Li \*

Department of Medicinal Chemistry, Key Laboratory of Chemical Biology (Ministry of Education) and NMPA Key Laboratory for Technology Research and Evaluation of Drug Products, School of Pharmaceutical Sciences, Cheeloo College of Medicine, Shandong University, Jinan, Shandong, 250012, China.

\*Correspondence to: xli@sdu.edu.cn.

## Table of Contents

|                                                                                |     |
|--------------------------------------------------------------------------------|-----|
| 1. General techniques and chemicals .....                                      | 3   |
| 2. Optimization of reaction conditions.....                                    | 5   |
| 3. General procedure for the preparation of cyclopropanols .....               | 10  |
| 4. General procedure for asymmetric $\beta$ -arylation of cyclopropanols ..... | 16  |
| 5. Derivatization of chiral $\beta$ -aryl ketones .....                        | 38  |
| 6. Mechanistic studies.....                                                    | 46  |
| 7. X-ray Crystallography data.....                                             | 50  |
| 8. References.....                                                             | 57  |
| 9. NMR Spectra .....                                                           | 58  |
| 10. HPLC Spectra .....                                                         | 120 |

## General techniques and chemicals

Unless otherwise noted, all the reactions for the preparation of the substrates were performed in oven-dried glassware under nitrogen atmosphere with freshly distilled solvents. The catalytic reactions were performed under nitrogen atmosphere. The solvents were purified by distillation from calcium hydride unless otherwise noted. All other commercial reagents were used without further purification unless otherwise indicated.  $^1\text{H}$  NMR and  $^{13}\text{C}$  NMR spectra were recorded on Bruker 400 MHz spectrometer (ADVANCE III) using chloroform-*d* ( $\text{CDCl}_3$ ), methanol-*d*<sub>4</sub> ( $\text{CD}_3\text{OD}$ ) and dimethyl sulphoxide-*d*<sub>6</sub> ( $\text{DMSO-}d_6$ ) as the internal standard. Chemical shifts were reported in parts per million (ppm), and the residual solvent peak was used as an internal reference: proton (chloroform  $\delta$  7.26), carbon (chloroform  $\delta$  77.1), proton (methanol  $\delta$  3.31), carbon (methanol  $\delta$  49.0) or tetramethylsilane (TMS  $\delta$  0.00) was used as a reference. Data are reported as follows: chemical shift, multiplicity (s = singlet, d = doublet, t = triplet, q = quartet, m = multiplet, br = broad), coupling constants (Hz) and integration. The enantiomeric ratio (er) was determined by HPLC analysis on Agilent 1260 Infinity II Prime using Daicel CHIRALPAK® column IA-U, IB-U, IC-U or LC-20AD/T LPGE KIT using Daicel CHIRALPAK® column IA-3, IB-3, IC-3. X-ray diffraction analyses were carried out on a microcrystalline powder using a Rigaku Oxford Diffraction XtaLAB Synergy-S diffractometer using Cu radiation ( $\lambda = 1.54184$  Å). If not specially mentioned, flash column chromatography was performed using 200-300 silica gel purchased from Yaitai Chemicals (China). High-resolution mass spectra (HRMS) were recorded on a Bruker Apex IV FTMS mass spectrometer using ESI (electrospray ionization) as ionization method. Optical rotations were recorded on an AUTOPOL II digital polarimeter at 589 nm and are recorded as  $[\alpha]_{\text{D}}^{\text{T}}$  (concentration in grams/100 mL solvent).

The LEDs reaction machine was purchased from Beijing Strongerscience Co., Ltd., the LEDs emits blue light with a spectral output centered at 465 nm (Figure 1).

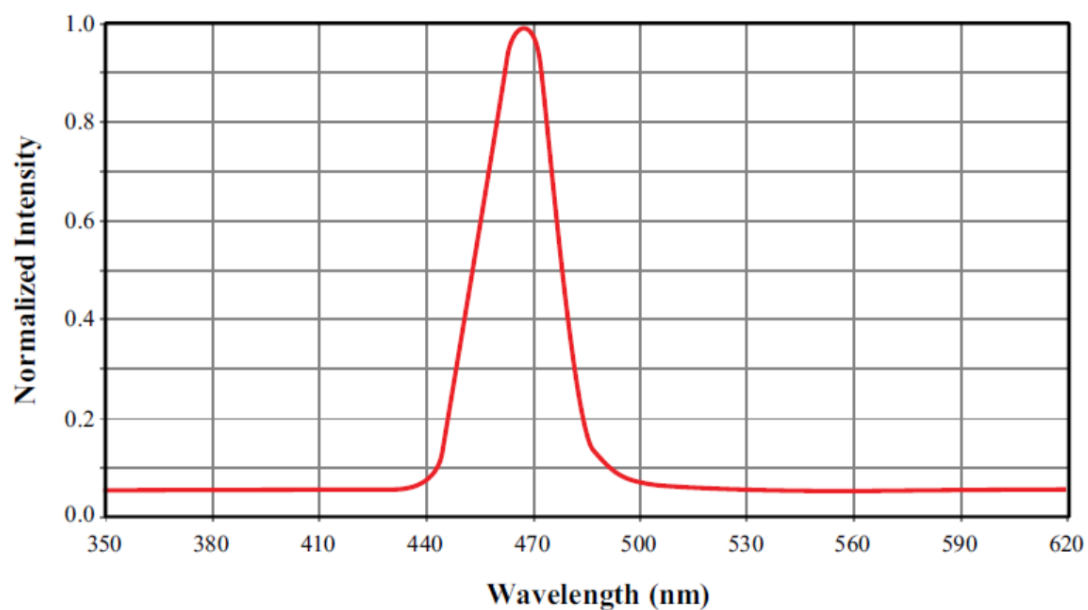

**Figure S1: Spectral intensity distribution of LEDs**

The reactions were stirred by IKA® RCT basic stirrer, cooled by ethanol circulator bath (Figure 2).

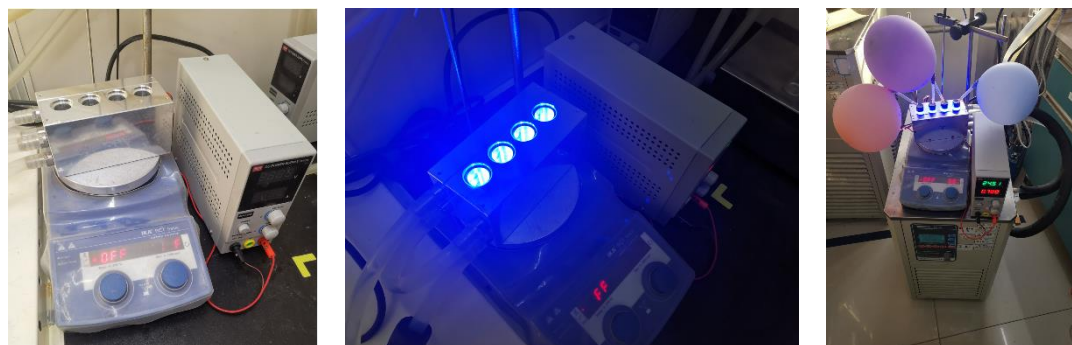

**Figure S2: Appearance of Blue LEDs reaction System.**

## Optimization of reaction conditions

**Table S1. Preliminary investigation of chiral ligands.** [a]

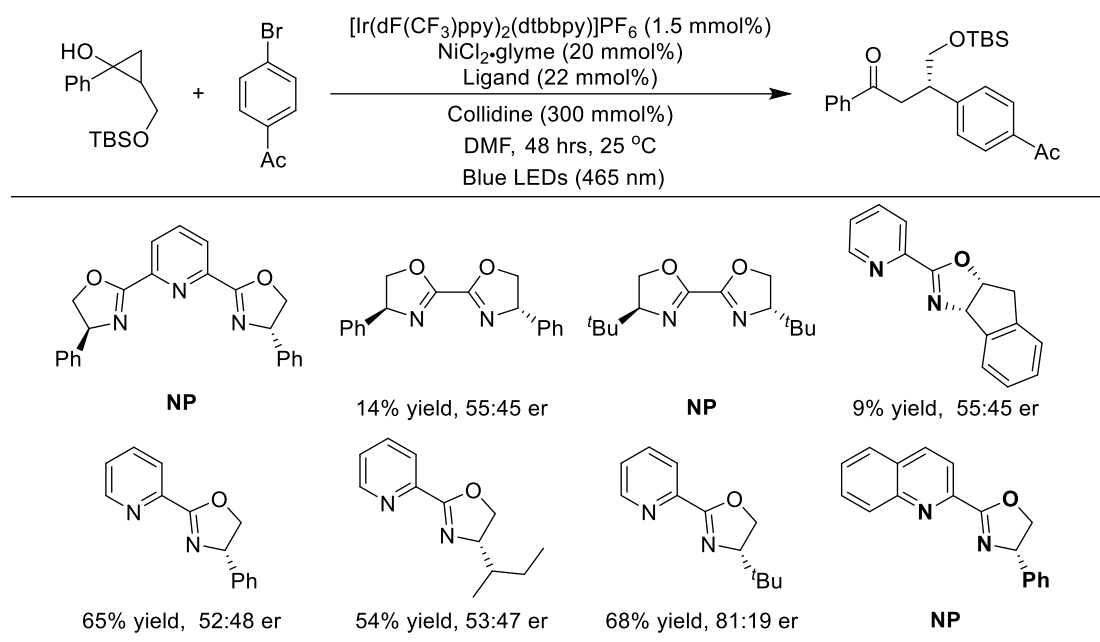

[a] Unless otherwise indicated, all reactions were performed with Ir cat (1.5 mmol%), NiCl<sub>2</sub>·glyme (20 mmol%), chiral ligand (22 mmol%), collidine (300 mmol%), cyclopropanol (0.30 mmol) and 4-bromoacetophenone (0.10 mmol) in DMF (5 mL) at 25 °C with blue LEDs irradiation under nitrogen atmosphere. NP: No product.

After screening a series of chiral ligands, reactions with chiral Py-(oxazoline) ligands gave better enantioselectivities.

**Table S2. Investigation of aryl electrophiles and silyl protection groups.** [a]

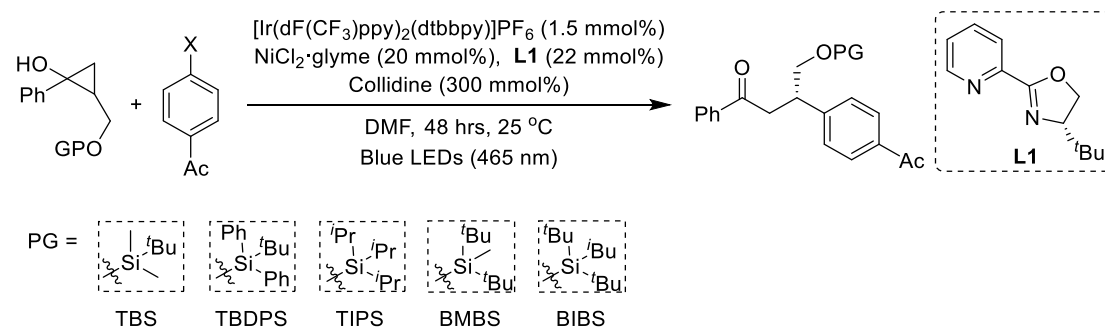

| Entry. | PG  | X  | Yield (%) <sup>b</sup> | er <sup>c</sup> |
|--------|-----|----|------------------------|-----------------|
| 1      | TBS | Cl | 0                      | -               |
| 2      | TBS | Br | 68                     | 81:19           |
| 3      | TBS | I  | 13                     | 81:19           |

|    |       |                    |    |           |
|----|-------|--------------------|----|-----------|
| 4  | TBS   | OTf                | 5  | 52:48     |
| 5  | TBS   | B(OH) <sub>2</sub> | 0  | -         |
| 6  | TBS   | BPin               | 0  | -         |
| 7  | TBDPS | Br                 | 63 | 80:20     |
| 8  | TIPS  | Br                 | 71 | 84:16     |
| 9  | BMBS  | Br                 | 51 | 83.5:16.5 |
| 10 | BIBS  | Br                 | 50 | 81:19     |

[a] Unless otherwise indicated, all reactions were performed with Ir cat (1.5 mmol%), NiCl<sub>2</sub>glyme (20 mmol%), L1 (22 mmol%), collidine (300 mmol%), cyclopropanols (0.30 mmol) and electrophiles (0.10 mmol) in DMF (5 mL) at 25 °C with blue LEDs irradiation under nitrogen atmosphere. [b] Isolated yield. [c] Determined by HPLC analysis.

**Table S3. Investigation of Ni(II) catalysts, ligands and photoredox catalysts.** [a]

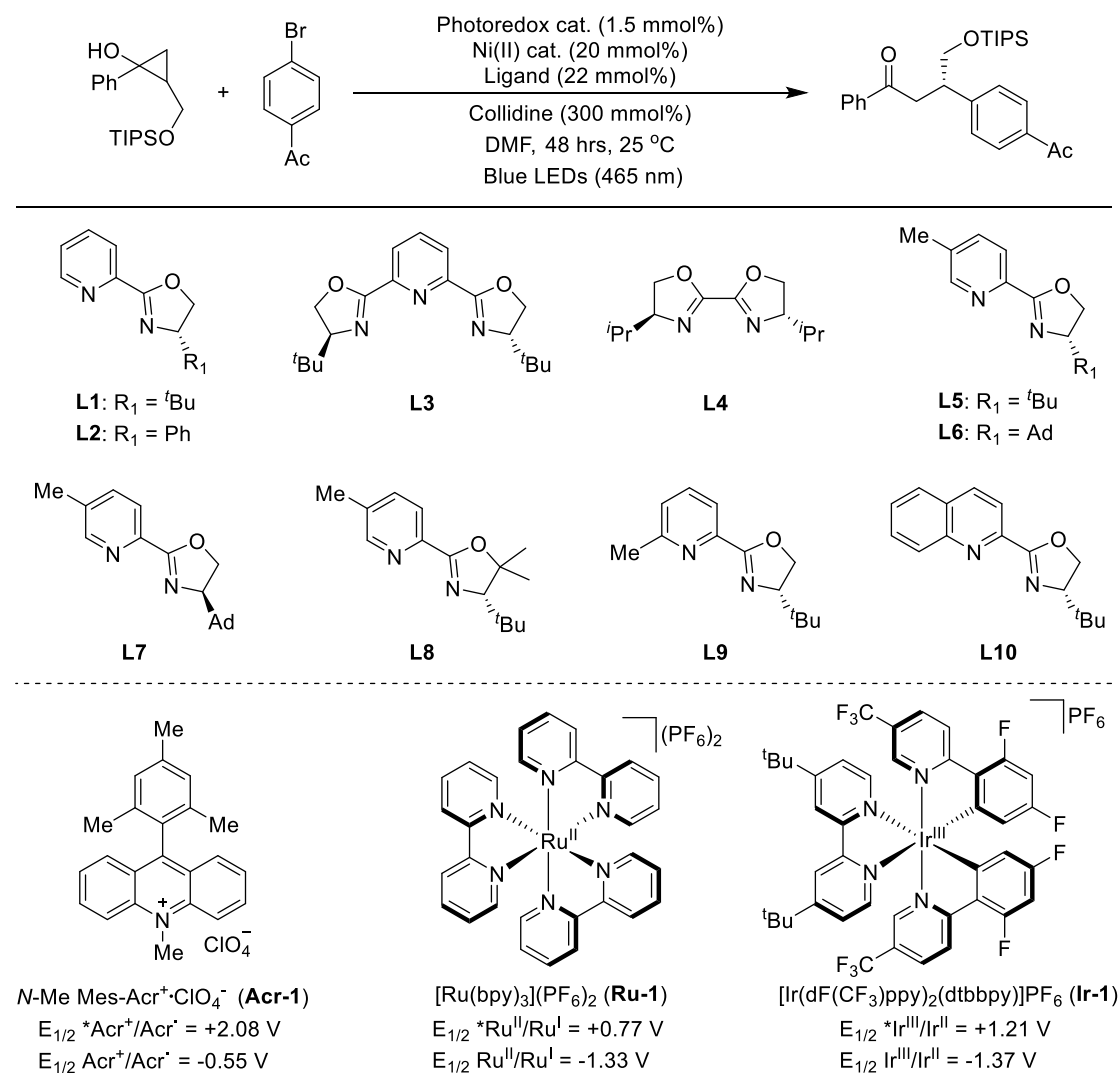

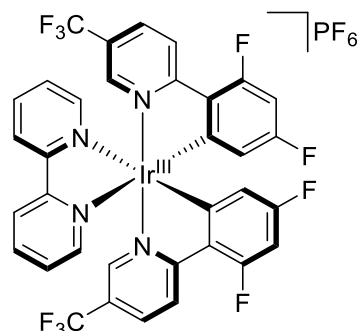

$[\text{Ir}(\text{dF}(\text{CF}_3)\text{ppy})_2(\text{bpy})]\text{PF}_6$  (**Ir-2**)

$$E_{1/2}^* \text{Ir}^{\text{III}}/\text{Ir}^{\text{II}} = +1.32 \text{ V}$$

$$E_{1/2} \text{Ir}^{\text{III}}/\text{Ir}^{\text{II}} = -1.37 \text{ V}$$

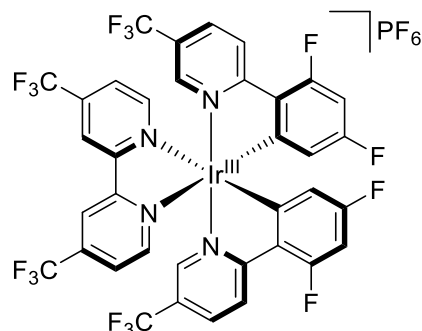

$[\text{Ir}(\text{dF}(\text{CF}_3)\text{ppy})_2(4,4'\text{-d}(\text{CF}_3)\text{bpy})]\text{PF}_6$  (**Ir-3**)

$$E_{1/2}^* \text{Ir}^{\text{III}}/\text{Ir}^{\text{II}} = +1.27 \text{ V}$$

$$E_{1/2} \text{Ir}^{\text{III}}/\text{Ir}^{\text{II}} = -1.07 \text{ V}$$

| Entry | Ligands    | Ni(II) cat.                                        | Photoredox cat. | Yields (%) <sup>b</sup> | er <sup>c</sup> |
|-------|------------|----------------------------------------------------|-----------------|-------------------------|-----------------|
| 1     | <b>L1</b>  | NiCl <sub>2</sub> ·glyme                           | <b>Ir-1</b>     | 71                      | 84:16           |
| 2     | <b>L1</b>  | NiBr <sub>2</sub> ·glyme                           | <b>Ir-1</b>     | 58                      | 87:13           |
| 3     | <b>L1</b>  | NiI <sub>2</sub>                                   | <b>Ir-1</b>     | 0                       | -               |
| 4     | <b>L1</b>  | Ni(OAc) <sub>2</sub>                               | <b>Ir-1</b>     | 80                      | 88:12           |
| 5     | <b>L1</b>  | Ni(acac) <sub>2</sub>                              | <b>Ir-1</b>     | 44                      | 82:18           |
| 6     | <b>L1</b>  | Ni(PPh <sub>3</sub> ) <sub>2</sub> Cl <sub>2</sub> | <b>Ir-1</b>     | 0                       | -               |
| 7     | <b>L2</b>  | Ni(OAc) <sub>2</sub>                               | <b>Ir-1</b>     | 70                      | 55:45           |
| 8     | <b>L3</b>  | Ni(OAc) <sub>2</sub>                               | <b>Ir-1</b>     | 0                       | -               |
| 9     | <b>L4</b>  | Ni(OAc) <sub>2</sub>                               | <b>Ir-1</b>     | 20                      | 60:40           |
| 10    | <b>L5</b>  | Ni(OAc) <sub>2</sub>                               | <b>Ir-1</b>     | 77                      | 90:10           |
| 11    | <b>L6</b>  | Ni(OAc) <sub>2</sub>                               | <b>Ir-1</b>     | 75                      | 93:7            |
| 12    | <b>L7</b>  | Ni(OAc) <sub>2</sub>                               | <b>Ir-1</b>     | 73                      | 7:93            |
| 13    | <b>L8</b>  | Ni(OAc) <sub>2</sub>                               | <b>Ir-1</b>     | 58                      | 79:21           |
| 14    | <b>L9</b>  | Ni(OAc) <sub>2</sub>                               | <b>Ir-1</b>     | 11                      | 92:8            |
| 15    | <b>L10</b> | Ni(OAc) <sub>2</sub>                               | <b>Ir-1</b>     | 0                       | -               |
| 16    | <b>L6</b>  | NiCl <sub>2</sub> ·glyme                           | <b>Ir-1</b>     | 64                      | 87:13           |
| 17    | <b>L6</b>  | NiBr <sub>2</sub> ·glyme                           | <b>Ir-1</b>     | 47                      | 90:10           |
| 18    | <b>L6</b>  | Ni(OAc) <sub>2</sub>                               | <b>Acr-1</b>    | 0                       | -               |
| 19    | <b>L6</b>  | Ni(OAc) <sub>2</sub>                               | <b>Ru-1</b>     | 0                       | -               |
| 20    | <b>L6</b>  | Ni(OAc) <sub>2</sub>                               | <b>Ir-2</b>     | 31                      | 92:8            |
| 21    | <b>L6</b>  | Ni(OAc) <sub>2</sub>                               | <b>Ir-3</b>     | 9                       | 79:21           |

[a] Unless otherwise indicated, all reactions were performed with Ir cat (1.5 mmol%), nickel catalysts (20 mmol%), chiral ligand (22 mmol%), collidine (300 mmol%), cyclopropanol (0.30 mmol) and 4-bromoacetophenone (0.10 mmol) in DMF (5 mL) at 25 °C with blue LEDs irradiation under nitrogen atmosphere. [b] Isolated yield. [c] Determined by HPLC analysis. Ad: Adamantyl. For **Acr-1**, **Ru-1**, **Ir-1** and **Ir-2**, potentials measured in V vs SCE in MeCN; for **Ir-3**, potentials measured in V vs FC<sup>+</sup>/FC in MeCN. <sup>1</sup>

After investigation of photocatalysts, nickel salts and chiral ligands, [Ir(dF(CF<sub>3</sub>)ppy)<sub>2</sub>(dtbbpy)]PF<sub>6</sub>, Ni(OAc)<sub>2</sub> and Py-(oxazoline) ligand **L6** were optimal for this reaction.

**Table S4. Investigation of solvents and bases.** <sup>[a]</sup>

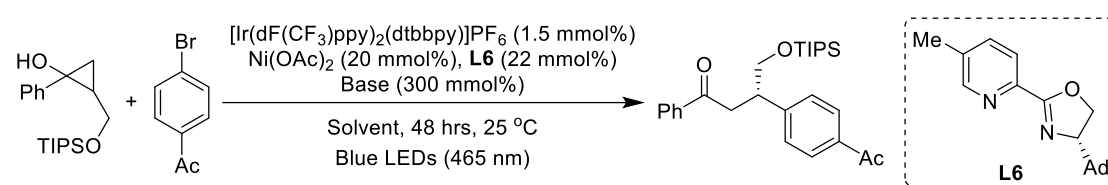

| Entry. | Solvent | base                                                                               | Yield (%) <sup>b</sup> | er <sup>c</sup> |
|--------|---------|------------------------------------------------------------------------------------|------------------------|-----------------|
| 1      | DCE     | collidine                                                                          | 0                      | -               |
| 2      | DMF     | collidine                                                                          | 75                     | 93:7            |
| 3      | DMA     | collidine                                                                          | 71                     | 88:12           |
| 4      | DMSO    | collidine                                                                          | 62                     | 75:25           |
| 5      | DMPU    | collidine                                                                          | 0                      | -               |
| 6      | DMF     | pyridine                                                                           | 20                     | 93.5:6.5        |
| 7      | DMF     | lutidine                                                                           | 64                     | 93:7            |
| 8      | DMF     | P <sup>n</sup> Bu <sub>3</sub> Et <sup>+</sup> (EtO) <sub>2</sub> POO <sup>-</sup> | 67                     | 87:13           |

[a] Unless otherwise indicated, all reactions were performed with Ir cat (1.5 mmol%), Ni(OAc)<sub>2</sub> (20 mmol%), **L6** (22 mmol%), base (300 mmol%), cyclopropanol (0.30 mmol) and 4-bromoacetophenone (0.10 mmol) in solvent (5 mL) at 25 °C with blue LEDs irradiation under nitrogen atmosphere. [b] Isolated yield. [c] Determined by HPLC analysis.

Reactions with DMF as the solvent and collidine as the base gave the best result.

**Table S5. Investigation of equivalents of cyclopropanol, reaction concentration and temperature.** <sup>[a]</sup>



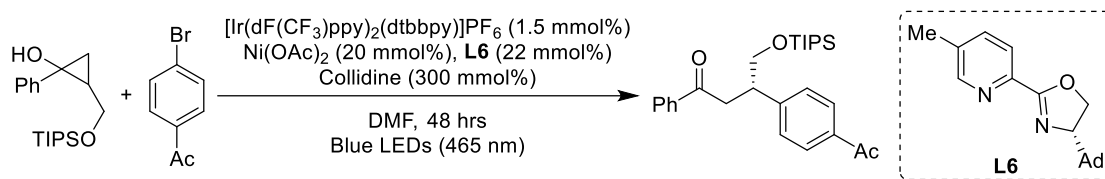

| Entry. | Cyclopropanol (eq.) | DMF    | Temp. (°C) | Yield (%) <sup>b</sup> | er <sup>c</sup> |
|--------|---------------------|--------|------------|------------------------|-----------------|
| 1      | 2.5                 | 5 mL   | 25 °C      | 60                     | 93:7            |
| 2      | 3.0                 | 5 mL   | 25 °C      | 75                     | 93:7            |
| 3      | 3.5                 | 5 mL   | 25 °C      | 76                     | 93:7            |
| 4      | 3.0                 | 2.5 mL | 25 °C      | 61                     | 92:8            |
| 5      | 3.0                 | 7.5 mL | 25 °C      | 77                     | 93:7            |
| 6      | 3.0                 | 5 mL   | 35 °C      | 77                     | 91:9            |
| 7      | 3.0                 | 5 mL   | 10 °C      | 31                     | 90:10           |

[a] Unless otherwise indicated, all reactions were performed with Ir cat (1.5 mmol%), Ni(OAc)<sub>2</sub> (20 mmol%), **L6** (22 mmol%), collidine (300 mmol%), cyclopropanol and 4-bromoacetophenone (0.10 mmol) in DMF at 25 °C with blue LEDs irradiation under nitrogen atmosphere. [b] Isolated yield. [c] Determined by HPLC analysis.

**Table S6. Control experiments.** <sup>[a]</sup>

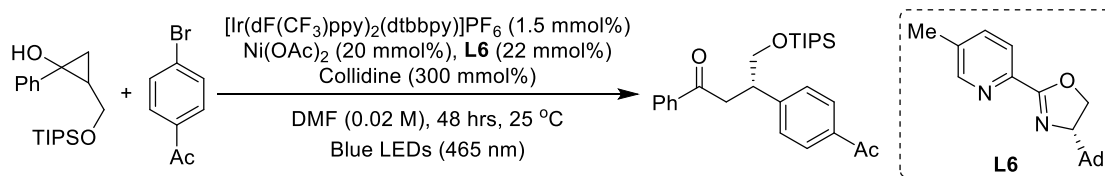

| Entry. | Variations from the standard conditions | Yield (%) <sup>b</sup> | er <sup>c</sup> |
|--------|-----------------------------------------|------------------------|-----------------|
| 1      | no change                               | 77                     | 93:7            |
| 2      | no Ir. catalyst                         | 0                      | -               |
| 3      | no Ni(OAc) <sub>2</sub>                 | 0                      | -               |
| 4      | no ligand                               | 0                      | -               |
| 5      | no base                                 | 0                      | -               |
| 6      | no light                                | 0                      | -               |

[a] Unless otherwise indicated, all reactions were performed with Ir cat (1.5 mmol%), Ni(OAc)<sub>2</sub> (20 mmol%), **L6** (22 mmol%), collidine (300 mmol%), cyclopropanol (0.30 mmol) and 4-bromoacetophenone (0.10 mmol) in DMF (5 mL) at 25 °C with blue LEDs irradiation under nitrogen atmosphere. [b] Isolated yield. [c] Determined by HPLC analysis.

## General procedure for the preparation of cyclopropanols

The  $\beta$ -oxy silyl ether ketone **S1** was prepared following literature reported.<sup>2</sup>

The cyclopropanols (**1**) was produced *via* Simmons–Smith sequence.<sup>3</sup>

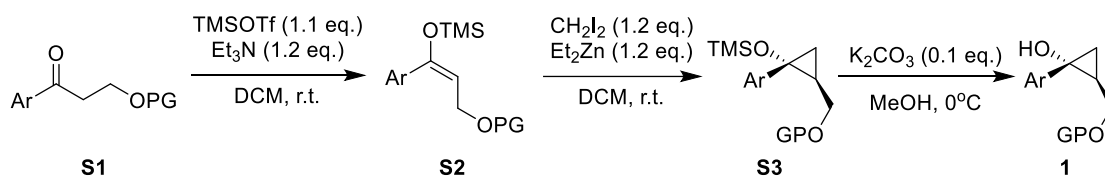

**General Procedure 1 (GP1):** To a stirred solution of ketone **S1** (10.0 mmol, 1.0 eq.) and Et<sub>3</sub>N (12.0 mmol, 1.2 eq.) in anhydrous DCM (20 mL) was added TMSOTf (11.0 mmol, 1.1 eq.) dropwise at 0 °C under nitrogen, then stirred at room temperature for 4 h. The reaction was cooled to 0 °C, quenched by saturated aq. NaHCO<sub>3</sub> (10 mL), extracted with DCM (20 mL×2). The combined organic layer was washed by brine, dried over anhydrous Na<sub>2</sub>SO<sub>4</sub>. The solvent was removed under reduced pressure and got crude silyl enol ether **S2**, which can be used to next step without further purification. The solution of **S2** in anhydrous DCM (20 mL) was cooled to 0 °C under nitrogen, then added CH<sub>2</sub>I<sub>2</sub> (12.0 mmol, 1.2 eq.) and Et<sub>2</sub>Zn (1 M in hexane, 12.0 mmol, 1.2 eq.) during 15 mins. The reaction was stirred at room temperature for 6 h. The reaction was cooled to 0 °C, quenched by saturated aq. NaHCO<sub>3</sub> (10 mL) and extracted with DCM (20 mL×2). The combined organic layer was washed by brine, dried over anhydrous Na<sub>2</sub>SO<sub>4</sub>. The solvent was removed under reduced pressure and got crude TMS-protected cyclopropanol **S3**, which was used in next step without further purification. The solution of TMS-protected cyclopropanol **S3** in methanol (10 mL) was cooled to 0 °C under nitrogen, then added K<sub>2</sub>CO<sub>3</sub> (1.0 mmol, 0.1 eq.) in one portion and stirred at 0 °C for 1 h. The reaction was quenched with water (20 mL), extracted with DCM (20 mL×2). The combined organic layer was washed by brine, dried over anhydrous Na<sub>2</sub>SO<sub>4</sub>. The solvent was removed under reduced pressure, the residue was purified by column chromatography on silica gel and gave desired product **1**. Notably, the *trans*-cyclopropanols **1** were isolated as major isomers following this procedure and used for the corresponding asymmetric transformations.

### 1-phenyl-2-(((triisopropylsilyloxy)methyl)cyclopropan-1-ol (1a)

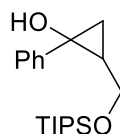

Following general procedure **GP 1**, got product **1a** (2.2 g, dr > 20:1) as pale-yellow oil in 53% yield over three steps.

$^1\text{H}$  NMR (400 MHz,  $\text{CDCl}_3$ )  $\delta$  1.03 – 1.15 (m, 21H), 1.21 – 1.27 (m, 2H), 1.46 – 1.57 (m, 1H), 3.53 (s, 1H), 3.94 (dd,  $J = 10.7, 7.6$  Hz, 1H), 4.33 (dd,  $J = 10.7, 4.9$  Hz, 1H), 7.21 (dt,  $J = 8.6, 4.3$  Hz, 1H), 7.32 (d,  $J = 4.3$  Hz, 4H);  $^{13}\text{C}$  NMR (100 MHz,  $\text{CDCl}_3$ )  $\delta$  12.0, 18.1, 21.0, 28.8, 59.7, 63.6, 124.5, 126.3, 128.3, 144.6.

### 1-(p-tolyl)-2-(((triisopropylsilyloxy)methyl)cyclopropan-1-ol (1b)

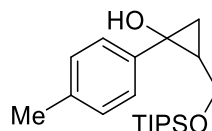

Following general procedure **GP 1**, got product **1b** (5.0 g, dr > 20:1) as colorless oil in 47% yield over three steps.

$^1\text{H}$  NMR (400 MHz,  $\text{CDCl}_3$ )  $\delta$  1.04 – 1.15 (m, 21H), 1.17 – 1.22 (m, 2H), 1.45 – 1.52 (m, 1H), 2.33 (s, 3H), 3.44 (s, 1H), 3.92 (dd,  $J = 10.7, 7.7$  Hz, 1H), 4.30 (dd,  $J = 10.7, 5.0$  Hz, 1H), 7.13 (d,  $J = 8.0$  Hz, 2H), 7.22 (d,  $J = 8.1$  Hz, 2H);  $^{13}\text{C}$  NMR (101 MHz, Chloroform-*d*)  $\delta$  12.0, 18.1, 20.7, 21.1, 28.5, 59.6, 63.6, 124.7, 129.0, 136.0, 141.6.

### 1-(4-ethylphenyl)-2-(((triisopropylsilyloxy)methyl)cyclopropan-1-ol (1c)

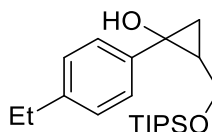

Following general procedure **GP 1**, got product **1c** (1.0 g, dr > 20:1) as pale-yellow oil in 47% yield over three steps.

$^1\text{H}$  NMR (400 MHz,  $\text{CDCl}_3$ )  $\delta$  1.04 – 1.14 (m, 21H), 1.17 (d,  $J = 1.9$  Hz, 2H), 1.23 (t,  $J = 7.6$  Hz, 3H), 1.45 – 1.54 (m, 1H), 2.63 (q,  $J = 7.6$  Hz, 2H), 3.38 (s, 1H), 3.93 (dd,  $J = 10.7, 7.7$  Hz, 1H), 4.30 (dd,  $J = 10.7, 5.0$  Hz, 1H), 7.15 (d,  $J = 8.1$  Hz, 2H), 7.25 (d,

$J = 7.9$  Hz, 2H);  $^{13}\text{C}$  NMR (100 MHz,  $\text{CDCl}_3$ )  $\delta$  12.0, 15.7, 18.1, 20.6, 28.49, 28.52, 59.7, 63.6, 124.9, 127.8, 141.9, 142.4.

### 1-(3,5-dimethylphenyl)-2-(((triisopropylsilyl)oxy)methyl)cyclopropan-1-ol (**1d**)

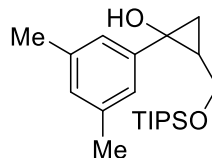

Following general procedure **GP 1**, got product **1d** (2.7 g, dr > 20:1) as colorless oil in 45% yield over three steps.

$^1\text{H}$  NMR (400 MHz,  $\text{CDCl}_3$ )  $\delta$  1.04 – 1.15 (m, 21H), 1.18 (d,  $J = 3.2$  Hz, 1H), 1.20 (s, 1H), 1.45 – 1.54 (m, 1H), 2.30 (s, 6H), 3.46 (s, 1H), 3.94 (dd,  $J = 10.6, 7.5$  Hz, 1H), 4.29 (dd,  $J = 10.7, 4.9$  Hz, 1H), 6.85 (s, 1H), 6.95 (s, 2H);  $^{13}\text{C}$  NMR (101 MHz, Chloroform-*d*)  $\delta$  12.0, 18.1, 20.6, 21.4, 28.5, 59.7, 63.5, 122.6, 128.0, 137.8, 144.48.

### 1-(4-fluorophenyl)-2-(((triisopropylsilyl)oxy)methyl)cyclopropan-1-ol (**1e**)

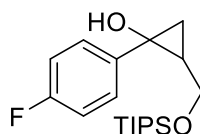

Following general procedure **GPI**, got product **1e** (1.9 g, dr > 20:1) as light-yellow oil in 69% yield over three steps.

$^1\text{H}$  NMR (400 MHz,  $\text{CDCl}_3$ )  $\delta$  1.03 – 1.15 (m, 21H), 1.16 – 1.20 (m, 1H), 1.23 (t,  $J = 6.3$  Hz, 1H), 1.42 – 1.51 (m, 1H), 3.58 (s, 1H), 3.93 (dd,  $J = 10.7, 7.6$  Hz, 1H), 4.32 (dd,  $J = 10.7, 4.8$  Hz, 1H), 6.99 (t,  $J = 8.7$  Hz, 2H), 7.29 (dd,  $J = 8.8, 5.3$  Hz, 2H);  $^{13}\text{C}$  NMR (101 MHz, Chloroform-*d*)  $\delta$  12.0, 18.1, 20.6, 28.5, 59.4, 63.5, 115.1 (d, C-F,  $^2J_{\text{C-F}} = 21.3$  Hz), 126.5 (d, C-F,  $^3J_{\text{C-F}} = 8.1$  Hz), 140.3 (d, C-F,  $^4J_{\text{C-F}} = 3.1$  Hz), 161.7 (d, C-F,  $^1J_{\text{C-F}} = 244.4$  Hz).

### 1-([1,1'-biphenyl]-4-yl)-2-(((triisopropylsilyl)oxy)methyl)cyclopropan-1-ol (**1f**)

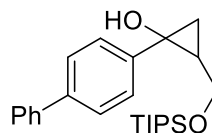

Following general procedure **GP 1**, got product **1f** (2.0 g, dr = 10:1) as white waxy solid (m.p. = 37-38 °C) in 46% yield over three steps.

$^1\text{H NMR}$  (400 MHz,  $\text{CDCl}_3$ )  $\delta$  1.03 – 1.14 (m, 21H), 1.14– 1.17 (m, 1H), 1.26 – 1.29 (m, 1H), 1.52 – 1.58 (m, 1H), 3.64 (s, 1H), 3.96 (dd,  $J = 10.7, 7.5$  Hz, 1H), 4.33 (dd,  $J = 10.7, 4.8$  Hz, 1H), 7.31 (t,  $J = 7.3$  Hz, 1H), 7.30 – 7.43 (m, 4H), 7.54 – 7.59 (m, 4H);  $^{13}\text{C NMR}$  (100 MHz,  $\text{CDCl}_3$ )  $\delta$  12.0, 18.1, 21.2, 29.0, 59.5, 63.6, 124.9, 127.1, 127.1, 127.2, 128.8, 139.2, 141.0, 143.9.

**1-(naphthalen-2-yl)-2-(((triisopropylsilyl)oxy)methyl)cyclopropan-1-ol (1g)**

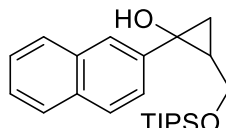

Following general procedure **GP 1**, got product **1g** (1.8 g, dr = 10:1) as white waxy solid (m.p. = 41-42 °C) in 57% yield over three steps.

$^1\text{H NMR}$  (400 MHz,  $\text{CDCl}_3$ )  $\delta$  1.05 – 1.11 (m, 21H), 1.31 – 1.36 (m, 2H), 1.58 – 1.66 (m, 1H), 3.67 (s, 1H), 3.99 (dd,  $J = 10.7, 7.5$  Hz, 1H), 4.36 (dd,  $J = 10.7, 4.9$  Hz, 1H), 7.34 (dd,  $J = 8.6, 1.6$  Hz, 1H), 7.39 – 7.48 (m, 2H), 7.78 – 7.81 (m, 3H), 7.86 (s, 1H);  $^{13}\text{C NMR}$  (100 MHz,  $\text{CDCl}_3$ )  $\delta$  12.0, 18.1, 21.0, 28.8, 59.9, 63.6, 123.1, 123.2, 125.5, 126.1, 127.6, 127.9, 128.1, 132.2, 133.4, 142.0.

**1-(furan-2-yl)-2-(((triisopropylsilyl)oxy)methyl)cyclopropan-1-ol (1h)**

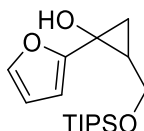

Following general procedure **GP 1**, got product **1h** (1.1 g, dr > 20:1) as light-yellow oil in 21% yield over three steps.

$^1\text{H NMR}$  (400 MHz,  $\text{CDCl}_3$ )  $\delta$  1.04 – 1.13 (m, 21H), 1.15 (d,  $J = 3.4$  Hz, 1H), 1.27 (dd,  $J = 9.6, 5.7$  Hz, 1H), 1.54 – 1.63 (m, 1H), 3.57 (s, 1H), 3.88 (dd,  $J = 10.8, 7.8$  Hz, 1H), 4.27 (dd,  $J = 10.8, 5.0$  Hz, 1H), 6.22 (d,  $J = 3.2$  Hz, 1H), 6.31 (dd,  $J = 2.9, 2.0$  Hz, 1H), 7.27 – 7.33 (m, 1H);  $^{13}\text{C NMR}$  (100 MHz,  $\text{CDCl}_3$ )  $\delta$  12.0, 18.0, 18.8, 26.5, 55.6, 63.2, 104.5, 110.4, 141.2, 156.8.

**1-(thiophen-2-yl)-2-(((triisopropylsilyl)oxy)methyl)cyclopropan-1-ol (1i)**

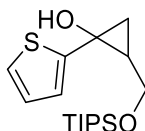

Following general procedure **GP 1**, got product **1i** (1.1 g, dr > 20:1) as light-yellow oil in 32% yield over three steps.

$^1\text{H}$  NMR (400 MHz,  $\text{CDCl}_3$ )  $\delta$  1.06 – 1.15 (m, 21H), 1.24 – 1.31 (m, 2H), 1.51 – 1.61 (m, 1H), 3.71 (s, 1H), 3.89 (dd,  $J = 10.8, 7.7$  Hz, 1H), 4.31 (dd,  $J = 10.8, 4.9$  Hz, 1H), 6.83 (dd,  $J = 3.6, 1.2$  Hz, 1H), 6.93 (dd,  $J = 5.0, 3.5$  Hz, 1H), 7.16 (dd,  $J = 5.0, 1.2$  Hz, 1H).

$^{13}\text{C}$  NMR (100 MHz,  $\text{CDCl}_3$ )  $\delta$  12.0, 18.1, 22.0, 29.7, 57.4, 63.4, 121.6, 123.7, 126.8, 150.0.

#### 1-(thiophen-3-yl)-2-(((triisopropylsilyl)oxy)methyl)cyclopropan-1-ol (**1j**)

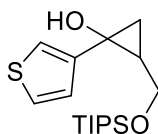

Following general procedure **GP 1**, got product **1j** (1.1 g, dr > 20:1) as light-yellow oil in 27% yield over three steps.

$^1\text{H}$  NMR (400 MHz,  $\text{CDCl}_3$ )  $\delta$  1.02 – 1.15 (m, 21H), 1.16 – 1.20 (m, 1H), 1.20 – 1.24 (m, 1H), 1.42 – 1.53 (m, 1H), 3.60 (s, 1H), 3.92 (dd,  $J = 10.7, 7.4$  Hz, 1H), 4.29 (dd,  $J = 10.7, 4.9$  Hz, 1H), 6.84 (d,  $J = 5.0$  Hz, 1H), 7.15 (d,  $J = 2.9$  Hz, 1H), 7.23 – 7.28 (m, 1H);  $^{13}\text{C}$  NMR (100 MHz,  $\text{CDCl}_3$ )  $\delta$  11.9, 18.1, 20.8, 28.5, 58.0, 63.4, 118.6, 124.6, 125.9, 146.7.

#### 1-(4-chlorophenyl)-2-(((triisopropylsilyl)oxy)methyl)cyclopropan-1-ol (**1k**)

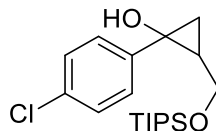

Following general procedure **GP 1**, got product **1k** (2.7 g, dr > 20:1) as light-yellow oil in 56% yield over three steps.

$^1\text{H}$  NMR (400 MHz,  $\text{CDCl}_3$ )  $\delta$  1.02 – 1.17 (m, 21H), 1.17 – 1.22 (m, 1H), 1.27 (t,  $J = 6.4$  Hz, 1H), 1.41 – 1.55 (m, 1H), 3.67 (s, 1H), 3.93 (dd,  $J = 10.8, 7.5$  Hz, 1H), 4.33 (dd,

$J = 10.8, 4.8 \text{ Hz, 1H), 7.20 - 7.33 (m, 4H); }^{13}\text{C NMR (100 MHz, CDCl}_3) \delta 11.9, 18.0, 21.2, 29.0, 59.2, 63.5, 125.8, 128.4, 132.0, 143.4.$

## General procedure for asymmetric $\beta$ -arylation of cyclopropanols

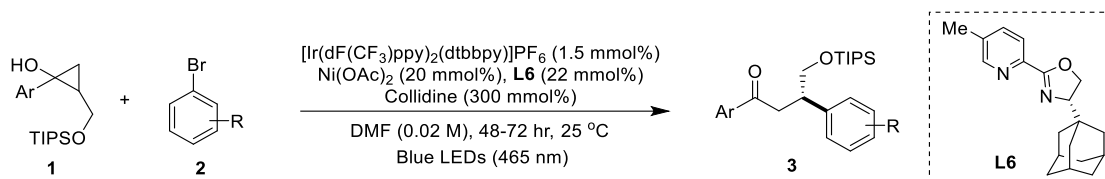

**General Procedure 2 (GP 2):** To a 10 mL vial equipped with a stir bar was added  $[\text{Ir}(\text{dF}(\text{CF}_3)\text{ppy})_2(\text{dtbbpy})]\text{PF}_6$  (1.7 mg, 1.5  $\mu\text{mol}$ , 1.5 mmol%), Nickel(II) acetate (3.6 mg, 20  $\mu\text{mol}$ , 20 mmol%), **L6** (6.6 mg, 22  $\mu\text{mol}$ , 22 mmol%) and aryl bromide **2** (0.1 mmol). The vial was sealed, evacuated and backfilled with nitrogen three times, then anhydrous DMF (5mL) was injected under nitrogen protection, stirred at room temperature for 10 min. Cyclopropanol **1** (0.3 mmol) and collidine (36.5 mg, 0.3 mmol) was injected *via* micro syringe respectively. After degassing the reaction mixture with Freeze-Pump-Thaw methods for three cycles, it was stirred and irradiated with the corresponding blue LEDs photoreactor at 25 °C (cooled by ethanol circulator bath) for 48~72 h. The reaction mixture was concentrated under reduced pressure and the residue was purified by column chromatography on silica gel (petroleum ether /ethyl acetate = 100:1 to 20:1 as the eluent) to give the product **3**.

### Procedure for preparation of **L6**

(S)-2-(adamantan-1-yl)-2-aminoethan-1-ol was synthesized following literature reported method.<sup>4</sup>

**L6** was prepared as following according to literature reported.<sup>5</sup>

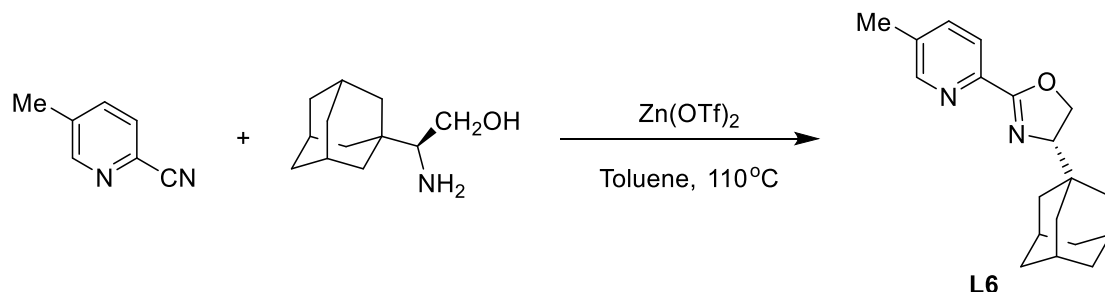

To a 100 mL two-necked round bottomed flask equipped with reflux condenser was added 5-methylpicolinonitrile (1.0 g, 8.46 mmol), (S)-2-(adamantan-1-yl)-2-aminoethan-1-ol (1.8 g, 9.31 mmol) and anhydrous toluene (35 mL), then anhydrous



zinc triflate (0.31 g, 0.85 mmol) was added under nitrogen protection. The reaction mixture was heated to reflux and stirred at this temperature for 24 h. Cooled the reaction to room temperature, dilute the mixture with EtOAc (30 mL) and washed with saturated aq. NaHCO<sub>3</sub> solution (30mL). The organic layer was separated and the aqueous layer was extracted the with EtOAc (30 mL×2). Combined of the organic layer was washed with brine, dried over anhydrous Na<sub>2</sub>SO<sub>4</sub> and concentrated under reduced pressure, the residue was purified by column chromatography on silica gel (dichloromethane /methanol = 100:1 to 20:1 as the eluent) to give the product (1.6 g) as a white solid in 64% yield. The white solid was recrystallized from ethanol to give **L6** (1.4 g) in 88% yield.

White solid, m.p. 142-143 °C;  $[\alpha]_{\text{D}}^{20.0} = -78.8$  (0.1, MeOH); <sup>1</sup>H NMR (400 MHz, CDCl<sub>3</sub>) δ 11.48 (d, *J* = 12.0 Hz, 3H), 1.68 – 1.74 (m, 9H), 2.00 (s, 3H), 2.39 (s, 3H), 3.94 (t, *J* = 9.2 Hz, 1H), 4.35 (t, *J* = 8.8 Hz, 1H), 4.49 (t, *J* = 8.8 Hz, 1H), 7.56 (d, *J* = 8.0 Hz, 1H), 7.97 (d, *J* = 8.0 Hz, 1H), 8.53 (s, 1H). <sup>13</sup>C NMR (101 MHz, CDCl<sub>3</sub>) δ 18.6, 28.3, 35.8, 37.2, 38.6, 67.8, 76.6, 123.5, 135.5, 137.0, 144.4, 150.2, 162.4; HRMS (ESI-quadrupole) *m/z* calcd. for C<sub>19</sub>H<sub>25</sub>N<sub>2</sub>O [M+H]<sup>+</sup>: 297.1961, found: 297.1962.

**(S)-3-(4-acetylphenyl)-1-phenyl-4-((triisopropylsilyl)oxy)butan-1-one (3a)**

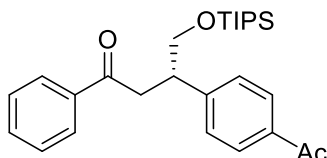

Colorless oil; 33 mg, 75% yield; 93:7 er;  $[\alpha]_{\text{D}}^{20.0} = -13.9$  (0.1, CH<sub>2</sub>Cl<sub>2</sub>); [Daicel CHIRALPAK® IA-3 (4.6 mm x 250mm), *n*-hexane/2-propanol = 70/30, *v* = 1.0 mL·min<sup>-1</sup>, λ = 254 nm, *t* (major) = 7.0 min, *t* (minor) = 12.6 min]; <sup>1</sup>H NMR (400 MHz, CDCl<sub>3</sub>) δ 0.97 – 1.08 (m, 21H), 2.57 (s, 3H), 3.60 – 3.74 (m, 2H), 3.31 (dd, *J* = 6.8, 16.0 Hz, 1H), 3.94 (dd, *J* = 9.7, 5.0 Hz, 1H), 3.85 (dd, *J* = 6.3, 9.7 Hz, 1H), 7.39 (d, *J* = 8.2 Hz, 2H), 7.44 (t, *J* = 7.6 Hz, 2H), 7.55 (t, *J* = 7.3 Hz, 1H), 7.88 (d, *J* = 8.3 Hz, 2H), 7.94 (d, *J* = 7.0 Hz, 2H); <sup>13</sup>C NMR (100 MHz, CDCl<sub>3</sub>) δ 12.0, 18.0, 26.6, 40.5, 44.0, 67.0, 128.1, 128.4, 128.5, 128.6, 133.1, 135.7, 137.1, 148.3, 197.9, 198.6; HRMS (ESI- quadrupole) *m/z* calcd. for C<sub>27</sub>H<sub>39</sub>O<sub>3</sub>Si [M+H]<sup>+</sup>: 439.2663, found: 439.2667.

**(S)-3-(4-acetylphenyl)-1-(*p*-tolyl)-4-((triisopropylsilyl)oxy)butan-1-one (3b)**

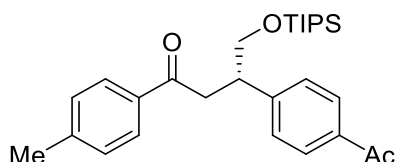

Colorless oil; 35 mg, 77% yield; 93:7 er;  $[\alpha]_{\text{D}}^{20.0} = -15.9$  (0.1,  $\text{CH}_2\text{Cl}_2$ ); [Daicel CHIRALPAK® IA-3 (4.6 mm x 250mm), *n*-hexane/2-propanol = 70/30,  $v = 1.0$   $\text{mL} \cdot \text{min}^{-1}$ ,  $\lambda = 254$  nm,  $t$  (major) = 5.6 min,  $t$  (minor) = 9.1 min];  $^1\text{H}$  NMR (400 MHz,  $\text{CDCl}_3$ )  $\delta$  0.97 – 1.08 (m, 21H), 2.40 (s, 3H), 2.56 (s, 3H), 3.28 (dd,  $J = 10.0, 18.8$  Hz, 1H), 3.60 – 3.69 (m, 2H), 3.84 (dd,  $J = 6.2, 9.7$  Hz, 1H), 3.93 (dd,  $J = 5.0, 9.7$  Hz, 1H), 7.24 (d,  $J = 8.0$  Hz, 2H), 7.38 (d,  $J = 8.2$  Hz, 2H), 7.84 (d,  $J = 8.1$  Hz, 2H), 7.87 (d,  $J = 8.3$  Hz, 2H);  $^{13}\text{C}$  NMR (100 MHz,  $\text{CDCl}_3$ )  $\delta$  12.0, 18.0, 21.7, 26.6, 40.3, 44.0, 67.0, 128.2, 128.4, 128.5, 129.3, 134.6, 135.6, 143.9, 148.4, 197.9, 198.3; HRMS (ESI-quadrupole)  $m/z$  calcd. for  $\text{C}_{28}\text{H}_{41}\text{O}_3\text{Si}$   $[\text{M}+\text{H}]^+$ : 453.2819, found: 453.2822.

**(S)-3-(4-acetylphenyl)-1-(4-ethylphenyl)-4-((triisopropylsilyl)oxy)butan-1-one (3c)**

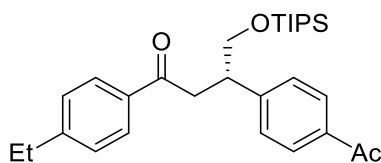

Colorless oil; 33 mg, 70% yield; 93:7 er;  $[\alpha]_{\text{D}}^{20.0} = -14.5$  (0.1,  $\text{CH}_2\text{Cl}_2$ ); [Daicel CHIRALPAK® IA-3 (4.6 mm x 250mm), *n*-hexane/2-propanol = 70/30,  $v = 1.0$   $\text{mL} \cdot \text{min}^{-1}$ ,  $\lambda = 254$  nm,  $t$  (major) = 6.4 min,  $t$  (minor) = 12.8 min];  $^1\text{H}$  NMR (400 MHz,  $\text{CDCl}_3$ )  $\delta$  0.94 – 1.09 (m, 21H), 1.25 (t,  $J = 7.6$  Hz, 3H), 2.57 (s, 3H), 2.70 (q,  $J = 7.6$  Hz, 2H), 3.30 (dd,  $J = 10.0, 18.8$  Hz, 1H), 3.61 – 3.72 (m, 2H), 3.84 (dd,  $J = 6.2, 9.6$  Hz, 1H), 3.93 (dd,  $J = 4.8, 9.6$  Hz, 1H), 7.26 (d,  $J = 7.6$  Hz, 2H), 7.39 (d,  $J = 8.1$  Hz, 2H), 7.87 (d,  $J = 8.0$  Hz, 4H);  $^{13}\text{C}$  NMR (100 MHz,  $\text{CDCl}_3$ )  $\delta$  12.0, 15.3, 18.0, 26.6, 29.0, 40.3, 44.0, 67.1, 128.1, 128.3, 128.4, 128.5, 134.8, 135.6, 148.4, 150.1, 197.9, 198.3; HRMS (ESI-quadrupole)  $m/z$  calcd. for  $\text{C}_{29}\text{H}_{43}\text{O}_3\text{Si}$   $[\text{M}+\text{H}]^+$ : 467.2976, found: 467.2971.

**(S)-3-(4-acetylphenyl)-1-(3,5-dimethylphenyl)-4-((triisopropylsilyl)oxy)butan-1-one (3d)**

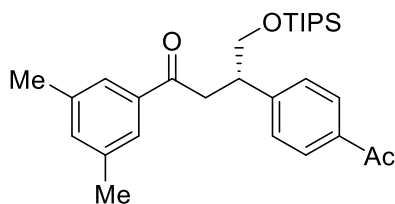

Colorless oil; 32 mg, 68% yield; 91:9 er;  $[\alpha]_{\text{D}}^{20.0} = -7.2$  (0.1,  $\text{CH}_2\text{Cl}_2$ ); [Daicel CHIRALPAK® IC-3 (4.6 mm x 250mm), *n*-hexane/2-propanol = 95/5,  $v = 1.0 \text{ mL} \cdot \text{min}^{-1}$ ,  $\lambda = 254 \text{ nm}$ ,  $t$  (major) = 7.1 min,  $t$  (minor) = 8.4 min];  $^1\text{H NMR}$  (400 MHz,  $\text{CDCl}_3$ )  $\delta$  0.97 – 1.08 (m, 21H), 2.35 (s, 6H), 2.57 (s, 3H), 3.20– 3.31 (m, 1H), 3.60 – 3.70 (m, 2H), 3.85 (dd,  $J = 6.2, 9.8 \text{ Hz}$ , 1H), 3.93 (dd,  $J = 4.9, 9.7, \text{ Hz}$ , 1H), 7.18 (s, 1H), 7.39 (d,  $J = 8.2 \text{ Hz}$ , 2H), 7.54 (s, 2H), 7.87 (d,  $J = 8.2 \text{ Hz}$ , 2H);  $^{13}\text{C NMR}$  (100 MHz,  $\text{CDCl}_3$ )  $\delta$  12.0, 18.0, 21.3, 26.6, 40.6, 44.1, 67.1, 125.9, 128.4, 128.5, 134.8, 135.7, 137.2, 138.3, 148.4, 197.9, 199.1; HRMS (ESI- quadrupole)  $m/z$  calcd. for  $\text{C}_{29}\text{H}_{43}\text{O}_3\text{Si}$   $[\text{M}+\text{H}]^+$ : 467.2976, found: 467.2976.

**(S)-3-(4-acetylphenyl)-1-(4-fluorophenyl)-4-((triisopropylsilyloxy)butan-1-yl)butan-1-one (3e)**

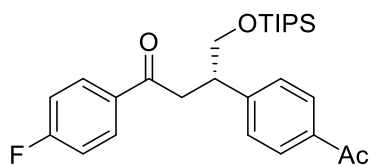

Colorless oil; 28 mg, 60% yield; 93:7 er;  $[\alpha]_{\text{D}}^{20.0} = -8.1$  (0.1,  $\text{CH}_2\text{Cl}_2$ ); [Daicel CHIRALPAK® IA-3 (4.6 mm x 250mm), *n*-hexane/2-propanol = 70/30,  $v = 1.0 \text{ mL} \cdot \text{min}^{-1}$ ,  $\lambda = 254 \text{ nm}$ ,  $t$  (major) = 5.8 min,  $t$  (minor) = 7.3 min];  $^1\text{H NMR}$  (400 MHz,  $\text{CDCl}_3$ )  $\delta$  0.98 – 1.09 (m, 21H), 2.57 (s, 3H), 3.27 (dd,  $J = 6.8, 16.0 \text{ Hz}$ , 1H), 3.60 – 3.71 (m, 2H), 3.84 (dd,  $J = 6.2, 9.7 \text{ Hz}$ , 1H), 3.94 (dd,  $J = 4.7, 9.7 \text{ Hz}$ , 1H), 7.11 (t,  $J = 8.6 \text{ Hz}$ , 2H), 7.39(d,  $J = 8.0 \text{ Hz}$ , 2H), 7.88 (d,  $J = 8.0 \text{ Hz}$ , 2H), 7.97 (dd,  $J = 5.5, 8.7 \text{ Hz}$ , 2H);  $^{13}\text{C NMR}$  (100 MHz,  $\text{CDCl}_3$ )  $\delta$ , 12.0, 18.0, 26.6, 40.3, 44.0, 67.0, 115.7, (d, C-F,  $^2J_{\text{C-F}} = 21.7 \text{ Hz}$ ), 128.3, 128.5, 130.7 (d, C-F,  $^3J_{\text{C-F}} = 9.2 \text{ Hz}$ ), 133.5 (d, C-F,  $^4J_{\text{C-F}} = 2.8 \text{ Hz}$ ), 135.7, 148.1, 165.80 (d, C-F,  $^1J_{\text{C-F}} = 253.3 \text{ Hz}$ ), 197.0, 197.8; HRMS (ESI- quadrupole)  $m/z$  calcd. for  $\text{C}_{27}\text{H}_{38}\text{FO}_3\text{Si}$   $[\text{M}+\text{H}]^+$ : 457.2569, found: 457.2568.

**(S)-1-([1,1'-biphenyl]-4-yl)-3-(4-acetylphenyl)-4-((triisopropylsilyloxy)butan-1-yl)butan-1-one (3f)**

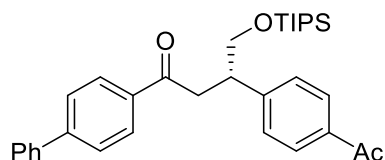

Colorless oil; 27 mg, 52% yield; 90:10 er;  $[\alpha]_{\text{D}}^{20.0} = -13.5$  (0.1,  $\text{CH}_2\text{Cl}_2$ ); [Daicel CHIRALPAK® IA-3 (4.6 mm x 250mm), *n*-hexane/2-propanol = 70/30,  $v = 1.0$   $\text{mL} \cdot \text{min}^{-1}$ ,  $\lambda = 254$  nm,  $t$  (major) = 8.2 min,  $t$  (minor) = 13.8 min];  $^1\text{H}$  NMR (400 MHz,  $\text{CDCl}_3$ )  $\delta$  0.99 – 1.09 (m, 21H), 2.57 (s, 3H), 3.34 (dd,  $J = 7.1, 16.0$ , Hz, 1H), 3.70 (m, 2H), 3.87 (dd,  $J = 6.2, 9.7$ , Hz, 1H), 3.96 (dd,  $J = 4.9, 9.7$  Hz, 1H), 7.40 – 7.45 (m, 3H), 7.47 (t,  $J = 7.4$  Hz, 2H), 7.62 (d,  $J = 7.2$  Hz, 2H), 7.67 (d,  $J = 8.4$  Hz, 2H), 7.89 (d,  $J = 8.2$  Hz, 2H), 8.02 (d,  $J = 8.4$  Hz, 2H);  $^{13}\text{C}$  NMR (100 MHz,  $\text{CDCl}_3$ )  $\delta$  12.0, 18.0, 26.7, 40.5, 44.0, 67.1, 127.3, 127.4, 128.3, 128.4, 128.5, 128.7, 129.0, 135.7, 135.8, 139.9, 145.8, 148.3, 197.9, 198.3; HRMS (ESI-quadrupole)  $m/z$  calcd. for  $\text{C}_{33}\text{H}_{43}\text{O}_3\text{Si}$   $[\text{M}+\text{H}]^+$ : 515.2976, found: 515.2978.

**(S)-3-(4-acetylphenyl)-1-(naphthalen-2-yl)-4-((triisopropylsilyl)oxy)butan-1-one (3g)**

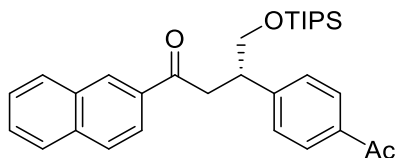

Colorless oil; 24 mg, 50% yield; 90:10 er;  $[\alpha]_{\text{D}}^{20.0} = -11.7$  (0.1,  $\text{CH}_2\text{Cl}_2$ ); [Daicel CHIRALPAK® IA-3 (4.6 mm x 250mm), *n*-hexane/2-propanol = 70/30,  $v = 1.0$   $\text{mL} \cdot \text{min}^{-1}$ ,  $\lambda = 254$  nm,  $t$  (major) = 15.6 min,  $t$  (minor) = 18.7 min];  $^1\text{H}$  NMR (400 MHz,  $\text{CDCl}_3$ )  $\delta$  0.99 – 1.08 (m, 21H), 2.56 (s, 3H), 3.43 (dd,  $J = 7.9, 16.8$  Hz, 1H), 3.68 – 3.74 (m, 1H), 3.84 (dd,  $J = 5.8, 16.8$ , Hz, 1H), 3.90 (dd,  $J = 6.6, 9.6$ , Hz, 1H), 3.99 (dd,  $J = 5.2, 9.7$ , Hz, 1H), 7.43 (d,  $J = 8.2$  Hz, 2H), 7.53 – 7.61 (m, 2H), 7.88 (t,  $J = 8.1$  Hz, 4H), 7.94 (d,  $J = 7.9$  Hz, 1H), 7.99 (d,  $J = 8.6$  Hz, 1H), 8.47 (s, 1H);  $^{13}\text{C}$  NMR (100 MHz,  $\text{CDCl}_3$ )  $\delta$  12.0, 18.0, 26.6, 40.5, 44.1, 67.1, 123.9, 126.8, 127.8, 128.4, 128.5, 129.6, 129.8, 132.6, 134.4, 135.6, 135.7, 148.3, 197.9, 198.6; HRMS (ESI- quadrupole)  $m/z$  calcd. for  $\text{C}_{31}\text{H}_{41}\text{O}_3\text{Si}$   $[\text{M}+\text{H}]^+$ : 489.2819, found: 489.2822.

**(S)-1-(furan-2-yl)-3-(4-(2-phenylacetyl)phenyl)-4-((triisopropylsilyl)oxy)butan-1-one (3h)**

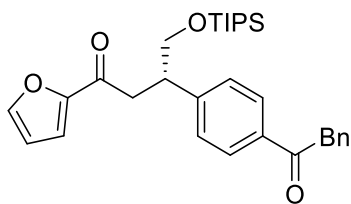

Colorless oil; 29 mg, 58% yield; 89:11 er;  $[\alpha]_{\text{D}}^{20.0} = -8.4$  (0.1,  $\text{CH}_2\text{Cl}_2$ ); [Daicel CHIRALPAK® IA-3 (4.6 mm x 250mm), *n*-hexane/2-propanol = 80/20,  $v = 1.0$  mL·min<sup>-1</sup>,  $\lambda = 254$  nm,  $t$  (major) = 7.6 min,  $t$  (minor) = 8.8 min]; <sup>1</sup>H NMR (400 MHz,  $\text{CDCl}_3$ )  $\delta$  0.92 – 1.11 (m, 21H), 3.17 (dd,  $J = 7.8, 16.5$  Hz, 1H), 3.48 (dd,  $J = 6.4, 16.5$  Hz, 1H), 3.62 (m, 1H), 3.82 (dd,  $J = 6.5, 9.7$  Hz, 1H), 3.90 (dd,  $J = 5.3, 9.7$  Hz, 1H), 4.24 (s, 2H), 6.50 (dd,  $J = 1.7, 3.6$  Hz, 1H), 7.15 (d,  $J = 3.5$  Hz, 1H), 7.21 – 7.27 (m, 3H), 7.28 – 7.34 (m, 2H), 7.37 (d,  $J = 8.3$  Hz, 2H), 7.54 (d,  $J = 1.5$  Hz, 1H), 7.93 (d,  $J = 8.3$  Hz, 2H); <sup>13</sup>C NMR (100 MHz,  $\text{CDCl}_3$ )  $\delta$  12.0, 18.0, 40.3, 43.7, 45.5, 67.0, 112.3, 117.0, 126.9, 128.4, 128.7, 128.8, 129.5, 134.7, 135.2, 146.3, 148.1, 152.9, 187.8, 197.3; HRMS (ESI- quadrupole)  $m/z$  calcd. for  $\text{C}_{31}\text{H}_{41}\text{O}_4\text{Si}$   $[\text{M}+\text{H}]^+$ : 505.2769, found: 505.2773.

**(S)-3-(4-(2-phenylacetyl)phenyl)-1-(thiophen-2-yl)-4-((triisopropylsilyl)oxy)butan-1-one (3i)**

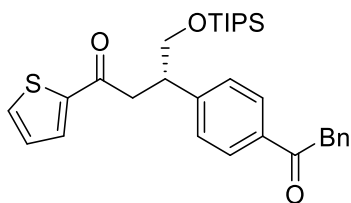

Colorless oil; 29 mg, 56% yield; 88:12 er;  $[\alpha]_{\text{D}}^{20.0} = -9.7$  (0.1,  $\text{CH}_2\text{Cl}_2$ ); [Daicel CHIRALPAK® IA-3 (4.6 mm x 250mm), *n*-hexane/2-propanol = 90/10,  $v = 1.0$  mL·min<sup>-1</sup>,  $\lambda = 254$  nm,  $t$  (major) = 13.1 min,  $t$  (minor) = 14.1 min]; <sup>1</sup>H NMR (400 MHz,  $\text{CDCl}_3$ )  $\delta$  0.96 – 1.10 (m, 21H), 3.24 (dd,  $J = 6.8, 11.2$  Hz, 1H), 3.55 – 3.66 (m, 2H), 3.83 (dd,  $J = 6.1, 9.7$  Hz, 1H), 3.92 (dd,  $J = 4.7, 9.7$  Hz, 1H), 4.24 (s, 2H), 7.11 (t,  $J = 3.6$  Hz, 1H), 7.21 – 7.27 (m, 3H), 7.32 (t,  $J = 7.6$  Hz, 2H), 7.38 (d,  $J = 8.3$  Hz, 2H), 7.60 (d,  $J = 3.9$  Hz, 1H), 7.72 (d,  $J = 2.8$  Hz, 1H), 7.93 (d,  $J = 8.3$  Hz, 2H); <sup>13</sup>C NMR (100 MHz,  $\text{CDCl}_3$ )  $\delta$  12.0, 18.0, 41.2, 44.1, 45.5, 66.9, 126.9, 128.1, 128.4, 128.7, 128.8, 129.5, 131.9, 133.7, 134.7, 135.2, 144.4, 148.1, 191.5, 197.3; HRMS (ESI- quadrupole)  $m/z$  calcd. for  $\text{C}_{31}\text{H}_{41}\text{O}_3\text{SSi}$   $[\text{M}+\text{H}]^+$ : 521.2540, found: 521.2545.

**(S)-3-(4-(2-phenylacetyl)phenyl)-1-(thiophen-3-yl)-4-((triisopropylsilyl)oxy)-**

**butan-1-one (3j)**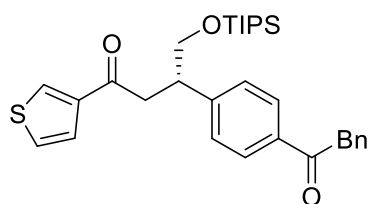

Colorless oil; 29 mg, 55% yield; 91:9 er;  $[\alpha]_{\text{D}}^{20.0} = -8.1$  (0.1,  $\text{CH}_2\text{Cl}_2$ ); [Daicel CHIRALPAK® IA-3 (4.6 mm x 250mm), *n*-hexane/2-propanol = 90/10,  $v = 1.0$  mL·min<sup>-1</sup>,  $\lambda = 254$  nm,  $t$  (major) = 15.6 min,  $t$  (minor) = 18.7 min]; <sup>1</sup>H NMR (400 MHz,  $\text{CDCl}_3$ )  $\delta$  0.97 – 1.08 (m, 21H), 3.21 (dd,  $J = 6.8, 16.0$  Hz, 1H), 3.53 – 3.68 (m, 2H), 3.82 (dd,  $J = 6.2, 9.7$  Hz, 1H), 3.91 (dd,  $J = 5.0, 9.7$  Hz, 1H), 4.24 (s, 2H), 7.22 – 7.26 (m, 3H), 7.27 – 7.34 (m, 3H), 7.38 (d,  $J = 8.2$  Hz, 2H), 7.51 (d,  $J = 5.1$  Hz, 1H), 7.93 (d,  $J = 8.3$  Hz, 2H), 8.04 (d,  $J = 3.6$  Hz, 1H); <sup>13</sup>C NMR (100 MHz,  $\text{CDCl}_3$ )  $\delta$  12.0, 18.0, 41.7, 43.9, 45.5, 67.0, 126.4, 126.9, 127.0, 128.4, 128.7, 128.8, 129.5, 132.0, 134.8, 135.1, 142.4, 148.3, 192.9, 197.3; HRMS (ESI- quadrupole)  $m/z$  calcd. for  $\text{C}_{31}\text{H}_{41}\text{O}_3\text{SSi}$   $[\text{M}+\text{H}]^+$ : 521.2540, found: 521.2542.

**(S)-1-phenyl-3-(4-(2-phenylacetyl)phenyl)-4-((triisopropylsilyl)oxy)butan-1-one (3k)**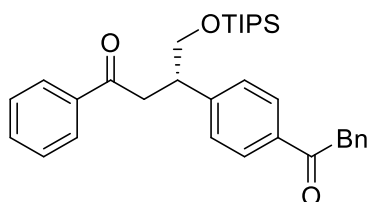

Colorless oil; 36 mg, 71% yield; 92:8 er;  $[\alpha]_{\text{D}}^{20.0} = -10.1$  (0.1,  $\text{CH}_2\text{Cl}_2$ ); [Daicel CHIRALPAK® IA-3 (4.6 mm x 250mm), *n*-hexane/2-propanol = 90/10,  $v = 1.0$  mL·min<sup>-1</sup>,  $\lambda = 254$  nm,  $t$  (major) = 13.0 min,  $t$  (minor) = 14.3 min]; <sup>1</sup>H NMR (400 MHz,  $\text{CDCl}_3$ )  $\delta$  0.95 – 1.08 (m, 21H), 3.30 (dd,  $J = 6.8, 16.0$  Hz, 1H), 3.59 – 3.74 (m, 2H), 3.83 (dd,  $J = 6.3, 9.6$  Hz, 1H), 3.92 (dd,  $J = 4.8, 9.7$  Hz, 1H), 4.24 (s, 2H), 7.21 – 7.27 (m, 3H), 7.31 (t,  $J = 8.3$  Hz, 2H), 7.38 (d,  $J = 8.3$  Hz, 2H), 7.44 (t,  $J = 7.6$  Hz, 2H), 7.55 (t,  $J = 7.4$  Hz, 1H), 7.93 (d,  $J = 8.2$  Hz, 4H); <sup>13</sup>C NMR (100 MHz,  $\text{CDCl}_3$ )  $\delta$  12.0, 18.0, 40.4, 43.9, 45.5, 67.0, 126.9, 128.1, 128.5, 128.6, 128.7, 128.8, 129.5, 133.2, 134.8, 135.1, 137.1, 148.4, 197.3, 198.7. HRMS (ESI- quadrupole)  $m/z$  calcd. for  $\text{C}_{33}\text{H}_{43}\text{O}_3\text{Si}$   $[\text{M}+\text{H}]^+$ : 515.2976, found: 515.2976.

**(S)-3-(4-(2-phenylacetyl)phenyl)-1-(p-tolyl)-4-((triisopropylsilyl)oxy)butan-1-one**  
**(3l)**

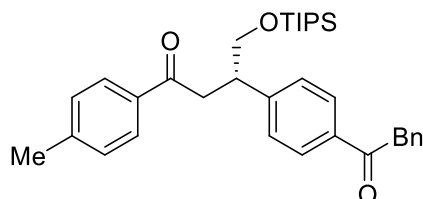

Colorless oil; 39 mg, 73% yield; 93:7 er;  $[\alpha]_D^{20.0} = -9.8$  (0.1, CH<sub>2</sub>Cl<sub>2</sub>); [Daicel CHIRALPAK® IA-3 (4.6 mm x 250mm), *n*-hexane/2-propanol = 70/30,  $v = 1.0$  mL·min<sup>-1</sup>,  $\lambda = 254$  nm,  $t$  (major) = 8.6 min,  $t$  (minor) = 13.2 min]; <sup>1</sup>H NMR (400 MHz, CDCl<sub>3</sub>)  $\delta$  0.96 – 1.06 (m, 21H), 2.40 (s, 3H), 3.27 (dd,  $J = 10.0, 18.8$  Hz, 1H), 3.58 – 3.69 (m, 2H), 3.83 (dd,  $J = 6.2, 9.6$  Hz, 1H), 3.92 (dd,  $J = 4.9, 9.6$  Hz, 1H), 4.24 (s, 2H), 7.20 – 7.26 (m, 5H), 7.31 (t,  $J = 7.6$  Hz, 2H), 7.37 (d,  $J = 8.1$  Hz, 2H), 7.84 (d,  $J = 8.1$  Hz, 2H), 7.93 (d,  $J = 8.2$  Hz, 2H); <sup>13</sup>C NMR (100 MHz, CDCl<sub>3</sub>)  $\delta$  12.0, 18.0, 21.7, 40.3, 44.0, 45.5, 67.0, 126.9, 128.2, 128.5, 128.7, 128.8, 129.3, 129.5, 134.6, 134.8, 135.1, 143.9, 148.5, 197.3, 198.3; HRMS (ESI- quadrupole)  $m/z$  calcd. for C<sub>34</sub>H<sub>45</sub>O<sub>3</sub>Si [M+H]<sup>+</sup>: 529.3132, found: 529.3133.

**(S)-1-(3,5-dimethylphenyl)-3-(4-(2-phenylacetyl)phenyl)-4-((triisopropylsilyl)oxy)butan-1-one (3m)**

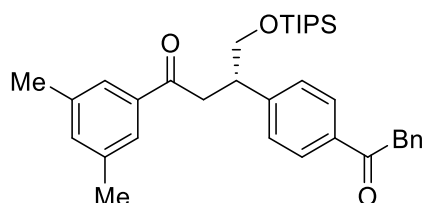

Colorless oil; 41 mg, 75% yield; 91:9 er;  $[\alpha]_D^{20.0} = -11.7$  (0.1, CH<sub>2</sub>Cl<sub>2</sub>); [Daicel CHIRALPAK® IC-3 (4.6 mm x 250mm), *n*-hexane/2-propanol = 80/20,  $v = 1.0$  mL·min<sup>-1</sup>,  $\lambda = 254$  nm,  $t$  (major) = 10.8 min,  $t$  (minor) = 12.5 min]; <sup>1</sup>H NMR (400 MHz, CDCl<sub>3</sub>)  $\delta$  1.07 – 0.96 (m, 21H), 2.34 (s, 6H), 3.31 – 3.19 (m, 1H), 3.70 – 3.57 (m, 2H), 3.87 – 3.80 (m, 1H), 3.96 – 3.88 (m, 1H), 4.24 (s, 2H), 7.17 (s, 1H), 7.27 – 7.21 (m, 3H), 7.34 – 7.28 (m, 2H), 7.38 (d,  $J = 8.3$  Hz, 2H), 7.53 (s, 2H), 7.93 (d,  $J = 8.1$  Hz, 2H); <sup>13</sup>C NMR (100 MHz, CDCl<sub>3</sub>)  $\delta$  12.0, 18.0, 21.3, 40.5, 44.0, 45.5, 67.1, 125.9, 126.9, 128.5, 128.7, 128.8, 129.5, 134.7, 134.8, 135.1, 137.3, 138.3, 148.5, 197.3, 199.0; HRMS (ESI- quadrupole)  $m/z$  calcd. for C<sub>35</sub>H<sub>47</sub>O<sub>3</sub>Si [M+H]<sup>+</sup>: 543.3289, found:

543.3290.

**(S)-1-(4-chlorophenyl)-3-(4-(2-phenylacetyl)phenyl)-4-((triisopropylsilyl)oxy)butan-1-one (3n)**

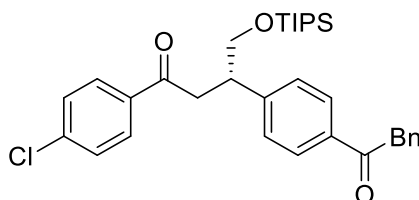

Colorless oil; 36 mg, 65% yield; 92:8 er;  $[\alpha]_D^{20.0} = -7.7$  (0.1, CH<sub>2</sub>Cl<sub>2</sub>); [Daicel CHIRALPAK® IA-3 (4.6 mm x 250mm), *n*-hexane/2-propanol = 80/20,  $v = 1.0$  mL·min<sup>-1</sup>,  $\lambda = 254$  nm,  $t$  (major) = 10.1 min,  $t$  (minor) = 12.7 min]; <sup>1</sup>H NMR (400 MHz, CDCl<sub>3</sub>)  $\delta$  0.94 – 1.05 (m, 21H), 3.25 (dd,  $J = 6.4, 16.4$  Hz, 1H), 3.63 (m, 2H), 3.83 (dd,  $J = 6.3, 9.7$ , Hz, 1H), 3.92 (dd,  $J = 4.8, 9.6$ , Hz, 1H), 4.24 (s, 2H), 7.25 (m, 3H), 7.31 (t,  $J = 6.8$  Hz, 2H), 7.37 (d,  $J = 8.2$  Hz, 2H), 7.41 (d,  $J = 8.6$  Hz, 2H), 7.87 (d,  $J = 8.6$  Hz, 2H), 7.93 (d,  $J = 8.3$  Hz, 2H); <sup>13</sup>C NMR (100 MHz, CDCl<sub>3</sub>)  $\delta$  12.0, 18.0, 40.4, 43.9, 45.5, 66.9, 126.9, 128.4, 128.7, 128.9, 129.0, 129.5, 129.6, 134.7, 135.2, 135.4, 139.6, 148.1, 197.3, 197.4; HRMS (ESI- quadrupole)  $m/z$  calcd. for C<sub>33</sub>H<sub>12</sub>ClO<sub>3</sub>Si [M+H]<sup>+</sup>: 549.2586, found: 549.2585.

**(S)-3-(4-isobutyrylphenyl)-1-(*p*-tolyl)-4-((triisopropylsilyl)oxy)butan-1-one (3o)**

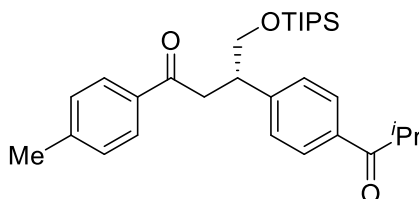

Colorless oil; 40 mg, 83% yield; 92:8 er;  $[\alpha]_D^{20.0} = -10.4$  (0.1, CH<sub>2</sub>Cl<sub>2</sub>); [Daicel CHIRALPAK® IA-3 (4.6 mm x 250mm), *n*-hexane/2-propanol = 70/30,  $v = 1.0$  mL·min<sup>-1</sup>,  $\lambda = 254$  nm,  $t$  (major) = 5.4 min,  $t$  (minor) = 8.7 min]; <sup>1</sup>H NMR (400 MHz, Chloroform-*d*)  $\delta$  0.97 – 1.07 (m, 21H), 1.18 (s, 3H), 1.20 (s, 3H), 2.40 (s, 3H), 3.29 (dd,  $J = 9.6, 18.8$  Hz, 1H), 3.48 – 3.56 (m, 1H), 3.59 – 3.69 (m, 2H), 3.84 (dd,  $J = 6.2, 9.6$  Hz, 1H), 3.93 (dd,  $J = 4.9, 9.7$  Hz, 1H), 7.24 (d,  $J = 8.0$  Hz, 2H), 7.38 (d,  $J = 8.2$  Hz, 2H), 7.85 (d,  $J = 8.3$  Hz, 2H), 7.87 (d,  $J = 8.4$  Hz, 2H); <sup>13</sup>C NMR (100 MHz, CDCl<sub>3</sub>)  $\delta$  12.0, 18.0, 19.2, 19.3, 21.7, 35.3, 40.3, 44.0, 67.1, 128.2, 128.4, 128.5, 129.3, 134.6, 134.7, 143.9, 148.1, 198.4, 204.2; HRMS (ESI- quadrupole)  $m/z$  calcd. for C<sub>30</sub>H<sub>45</sub>O<sub>3</sub>Si



[M+H]<sup>+</sup>: 481.3132, found: 481.3131.

**(S)-3-(4-pivaloylphenyl)-1-(p-tolyl)-4-((triisopropylsilyl)oxy)butan-1-one (3p)**

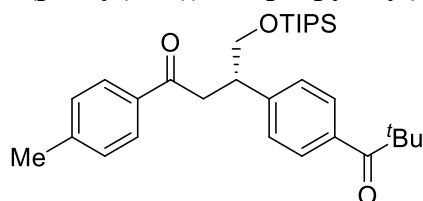

Colorless oil; 37 mg, 76% yield; 94:6 er;  $[\alpha]_D^{20.0} = -9.8$  (0.1, CH<sub>2</sub>Cl<sub>2</sub>); [Daicel CHIRALPAK® IA-3 (4.6 mm x 250mm), *n*-hexane/2-propanol = 90/10,  $v = 1.0$  mL·min<sup>-1</sup>,  $\lambda = 254$  nm,  $t$  (major) = 6.2 min,  $t$  (minor) = 11.2 min]; <sup>1</sup>H NMR (400 MHz, CDCl<sub>3</sub>)  $\delta$  0.94 – 1.04 (m, 21H), 1.33 (s, 9H), 2.40 (s, 3H), 3.22 – 3.32 (m, 1H), 3.58 – 3.68 (m, 2H), 3.83 (dd,  $J = 6.3, 9.6$  Hz, 1H), 3.92 (dd,  $J = 4.9, 9.7$  Hz, 1H), 7.23 (d,  $J = 8.0$  Hz, 2H), 7.32 (d,  $J = 8.2$  Hz, 2H), 7.65 (d,  $J = 8.2$  Hz, 2H), 7.85 (d,  $J = 8.1$  Hz, 2H); <sup>13</sup>C NMR (100 MHz, CDCl<sub>3</sub>)  $\delta$  12.0, 18.0, 21.7, 28.2, 40.3, 43.8, 44.2, 67.2, 127.8, 128.2, 128.3, 129.3, 134.7, 136.6, 143.8, 146.0, 198.5, 208.5; HRMS (ESI- quadrupole)  $m/z$  calcd. for C<sub>31</sub>H<sub>47</sub>O<sub>3</sub>Si [M+H]<sup>+</sup>: 495.3289, found: 495.3287.

**(S)-3-(4-pentanoylphenyl)-1-(p-tolyl)-4-((triisopropylsilyl)oxy)butan-1-one (3q)**

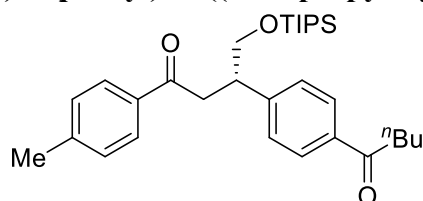

Colorless oil; 41 mg, 83% yield; 95:5 er;  $[\alpha]_D^{20.0} = -12.1$  (0.1, CH<sub>2</sub>Cl<sub>2</sub>); [Daicel CHIRALPAK® IA-3 (4.6 mm x 250mm), *n*-hexane/2-propanol = 90/10,  $v = 1.0$  mL·min<sup>-1</sup>,  $\lambda = 254$  nm,  $t$  (major) = 9.0 min,  $t$  (minor) = 17.6 min]; <sup>1</sup>H NMR (400 MHz, CDCl<sub>3</sub>)  $\delta$  0.94 (t,  $J = 7.3$  Hz, 3H), 0.97 – 1.05 (d,  $J = 5.9$  Hz, 21H), 1.38 (dt,  $J = 7.4, 14.7$  Hz, 2H), 1.70 (dt,  $J = 7.4, 14.7$  Hz, 2H), 2.40 (s, 3H), 2.92 (t,  $J = 7.4$  Hz, 2H), 3.28 (dd,  $J = 10.0, 19.2$  Hz, 1H), 3.59 – 3.70 (m, 2H), 3.84 (dd,  $J = 6.2, 9.7$  Hz, 1H), 3.93 (dd,  $J = 4.9, 9.7$  Hz, 1H), 7.23 (d,  $J = 8.0$  Hz, 2H), 7.38 (d,  $J = 8.1$  Hz, 2H), 7.84 (d,  $J = 8.0$  Hz, 2H), 7.87 (d,  $J = 8.0$  Hz, 2H); <sup>13</sup>C NMR (100 MHz, CDCl<sub>3</sub>)  $\delta$  12.0, 14.0, 18.0, 21.7, 22.6, 26.7, 38.4, 40.3, 44.0, 67.1, 128.2, 128.3, 129.3, 134.7, 135.6, 143.9, 148.1, 198.3, 200.3; HRMS (ESI- quadrupole)  $m/z$  calcd. for C<sub>31</sub>H<sub>47</sub>O<sub>3</sub>Si [M+H]<sup>+</sup>: 495.3289, found: 495.3292.

**(S)-3-(4-benzoylphenyl)-1-(p-tolyl)-4-((triisopropylsilyl)oxy)butan-1-one (3r)**

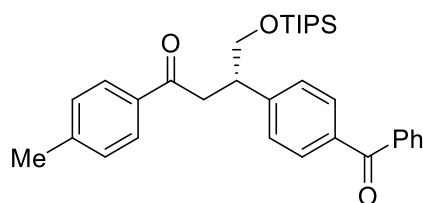

Colorless oil; 39 mg, 75% yield; 92:8 er;  $[\alpha]_D^{20.0} = -9.1$  (0.1,  $\text{CH}_2\text{Cl}_2$ ); [Daicel CHIRALPAK® IA-3 (4.6 mm x 250mm), *n*-hexane/2-propanol = 70/30,  $v = 1.0$  mL·min<sup>-1</sup>,  $\lambda = 254$  nm, *t* (major) = 5.4 min, *t* (minor) = 9.7 min]; <sup>1</sup>H NMR (400 MHz,  $\text{CDCl}_3$ )  $\delta$  0.97 – 1.10 (m, 21H), 2.40 (s, 3H), 3.32 (dd, *J* = 9.4, 18.5 Hz, 1H), 3.63 – 3.71 (m, 2H), 3.87 (dd, *J* = 6.1, 9.6 Hz, 1H), 3.96 (dd, *J* = 4.9, 9.7 Hz, 1H), 7.25 (d, *J* = 8.6 Hz, 2H), 7.41 (d, *J* = 8.2 Hz, 2H), 7.46 (t, *J* = 7.6 Hz, 2H), 7.57 (t, *J* = 7.4 Hz, 1H), 7.73 (d, *J* = 8.2 Hz, 2H), 7.77 (d, *J* = 7.1 Hz, 2H), 7.86 (d, *J* = 8.2 Hz, 2H); <sup>13</sup>C NMR (100 MHz,  $\text{CDCl}_3$ )  $\delta$  12.0, 18.0, 21.7, 40.3, 44.0, 67.2, 128.1, 128.3, 129.3, 130.1, 130.3, 132.3, 134.7, 135.9, 137.9, 143.9, 147.8, 196.5, 198.4; HRMS (ESI- quadrupole) *m/z* calcd. for  $\text{C}_{33}\text{H}_{43}\text{O}_3\text{Si}$   $[\text{M}+\text{H}]^+$ : 515.2976, found: 515.2971.

**(S)-3-(4-(4-methoxybenzoyl)phenyl)-1-(*p*-tolyl)-4-((triisopropylsilyl)oxy)butan-1-one (3s)**

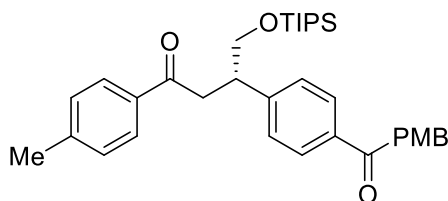

Colorless oil; 41 mg, 75% yield; 94:6 er;  $[\alpha]_D^{20.0} = -14.2$  (0.1,  $\text{CH}_2\text{Cl}_2$ ); [Daicel CHIRALPAK® IA-3 (4.6 mm x 250mm), *n*-hexane/2-propanol = 60/40,  $v = 1.0$  mL·min<sup>-1</sup>,  $\lambda = 254$  nm, *t* (major) = 6.9 min, *t* (minor) = 15.5 min]; <sup>1</sup>H NMR (400 MHz,  $\text{CDCl}_3$ )  $\delta$  0.97 – 1.06 (m, 21H), 2.40 (s, 3H), 3.31 (dd, *J* = 9.6, 18.4 Hz, 1H), 3.61 – 3.73 (m, 2H), 3.84 – 3.91 (m, 4H), 3.96 (dd, *J* = 4.9, 9.7 Hz, 1H), 6.94 (d, *J* = 8.8 Hz, 2H), 7.25 (d, *J* = 8.0 Hz, 2H), 7.39 (d, *J* = 8.1 Hz, 2H), 7.68 (d, *J* = 8.1 Hz, 2H), 7.79 (d, *J* = 8.8 Hz, 2H), 7.86 (d, *J* = 8.0 Hz, 2H); <sup>13</sup>C NMR (100 MHz,  $\text{CDCl}_3$ )  $\delta$  12.0, 18.1, 21.7, 40.4, 44.0, 55.6, 67.2, 113.6, 128.0, 128.3, 129.3, 130.0, 130.5, 132.6, 134.8, 136.6, 143.9, 147.2, 163.2, 195.4, 198.4; HRMS (ESI- quadrupole) *m/z* calcd. for  $\text{C}_{34}\text{H}_{45}\text{O}_4\text{Si}$   $[\text{M}+\text{H}]^+$ : 545.3082, found: 545.3080.

**(S)-3-(4-formylphenyl)-1-(*p*-tolyl)-4-((triisopropylsilyl)oxy)butan-1-one (3t)**

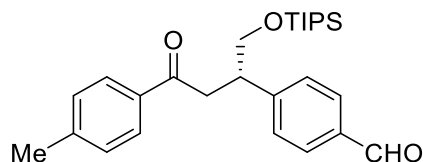

Colorless oil; 29 mg, 65% yield; 92:8 er;  $[\alpha]_{\text{D}}^{20.0} = -15.1$  (0.1,  $\text{CH}_2\text{Cl}_2$ ); [Daicel CHIRALPAK® IA-3 (4.6 mm x 250mm), *n*-hexane/2-propanol = 85/15,  $v = 1.0$   $\text{mL} \cdot \text{min}^{-1}$ ,  $\lambda = 254$  nm,  $t$  (major) = 7.0 min,  $t$  (minor) = 8.9 min];  $^1\text{H}$  NMR (400 MHz,  $\text{CDCl}_3$ )  $\delta$  0.94 – 1.07 (m, 21H), 2.40 (s, 3H), 3.30 (dd,  $J = 9.4, 18.6$ , Hz, 1H), 3.59 – 3.71 (m, 2H), 3.86 (dd,  $J = 5.9, 9.7$  Hz, 1H), 3.94 (dd,  $J = 5.0, 9.7$  Hz, 1H), 7.24 (d,  $J = 8.0$  Hz, 2H), 7.46 (d,  $J = 8.0$  Hz, 2H), 7.80 (d,  $J = 8.1$  Hz, 2H), 7.84 (d,  $J = 8.0$  Hz, 2H), 9.96 (s, 1H);  $^{13}\text{C}$  NMR (100 MHz,  $\text{CDCl}_3$ )  $\delta$  12.0, 18.0, 21.7, 40.2, 44.1, 67.0, 128.2, 128.9, 129.4, 129.9, 134.6, 135.1, 144.0, 150.2, 192.1, 198.2; HRMS (ESI- quadrupole)  $m/z$  calcd. for  $\text{C}_{27}\text{H}_{39}\text{O}_3\text{Si}$   $[\text{M}+\text{H}]^+$ : 439.2663, found: 439.2661.

**(S)-1-phenyl-3-(4-cyanophenyl)-4-((triisopropylsilyloxy)butan-1-one (3u)**

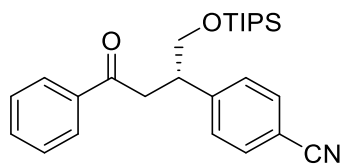

Colorless oil; 24 mg, 56% yield; 91:9 er;  $[\alpha]_{\text{D}}^{20.0} = -10.2$  (0.1,  $\text{CH}_2\text{Cl}_2$ ); [Daicel CHIRALPAK® IA-3 (4.6 mm x 250mm), *n*-hexane/2-propanol = 90/10,  $v = 1.0$   $\text{mL} \cdot \text{min}^{-1}$ ,  $\lambda = 254$  nm,  $t$  (major) = 6.3 min,  $t$  (minor) = 8.2 min];  $^1\text{H}$  NMR (400 MHz,  $\text{CDCl}_3$ )  $\delta$  0.94 – 1.10 (m, 21H), 3.31 (dd,  $J = 9.6, 18.8$  Hz, 1H), 3.59 – 3.71 (m, 2H), 3.85 (dd,  $J = 5.6, 9.8$  Hz, 1H), 3.93 (dd,  $J = 5.1, 9.8$  Hz, 1H), 7.41 (d,  $J = 8.3$  Hz, 2H), 7.45 (t,  $J = 7.7$  Hz, 2H), 7.56 (t,  $J = 7.4$  Hz, 3H), 7.93 (d,  $J = 7.2$  Hz, 2H);  $^{13}\text{C}$  NMR (100 MHz,  $\text{CDCl}_3$ )  $\delta$  11.9, 18.0, 40.2, 43.8, 66.8, 110.4, 119.1, 128.1, 128.7, 129.0, 132.2, 133.3, 136.9, 148.4, 198.3; HRMS (ESI- quadrupole)  $m/z$  calcd. for  $\text{C}_{26}\text{H}_{36}\text{NO}_2\text{Si}$   $[\text{M}+\text{H}]^+$ : 422.2510, found: 422.2510.

**(S)-3-(3-formylphenyl)-1-(*p*-tolyl)-4-((triisopropylsilyloxy)butan-1-one (3v)**

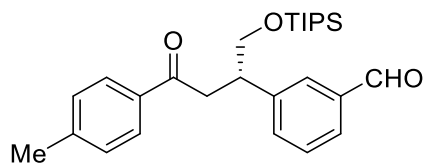

Colorless oil; 24 mg, 55% yield; 95:5 er;  $[\alpha]_{\text{D}}^{20.0} = -13.2$  (0.1,  $\text{CH}_2\text{Cl}_2$ ); [Daicel

CHIRALPAK® IA-3 (4.6 mm x 250mm), *n*-hexane/2-propanol = 90/10,  $v = 1.0$  mL·min<sup>-1</sup>,  $\lambda = 254$  nm,  $t$  (major) = 7.7 min,  $t$  (minor) = 17.9 min]; <sup>1</sup>H NMR (400 MHz, CDCl<sub>3</sub>)  $\delta$  0.95 – 1.05 (m, 21H), 2.40 (s, 3H), 3.30 (dd,  $J = 9.6, 18.8$  Hz, 1H), 3.62 – 3.72 (m, 2H), 3.86 (dd,  $J = 5.9, 9.6$  Hz, 1H), 3.94 (dd,  $J = 5.0, 9.7$  Hz, 1H), 7.24 (d,  $J = 8.0$  Hz, 2H), 7.44 (t,  $J = 7.6$  Hz, 1H), 7.59 (d,  $J = 7.7$  Hz, 1H), 7.71 (d,  $J = 7.6$  Hz, 1H), 7.82 (s, 1H), 7.85 (d,  $J = 8.1$  Hz, 2H), 9.98 (s, 1H); <sup>13</sup>C NMR (100 MHz, CDCl<sub>3</sub>)  $\delta$  12.0, 18.0, 21.7, 40.4, 43.6, 67.2, 128.2, 128.3, 129.0, 129.1, 129.4, 134.6, 134.8, 136.5, 143.9, 144.0, 192.5, 198.3; HRMS (ESI- quadrupole)  $m/z$  calcd. for C<sub>27</sub>H<sub>39</sub>O<sub>3</sub>Si [M+H]<sup>+</sup>: 439.2663, found: 439.2663.

**(S)-3-(3-acetylphenyl)-1-(*p*-tolyl)-4-((triisopropylsilyl)oxy)butan-1-one (3w)**

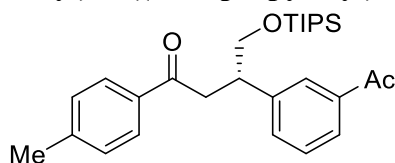

Colorless oil; 27 mg, 63% yield; 95:5 er;  $[\alpha]_D^{20.0} = -13.6$  (0.1, CH<sub>2</sub>Cl<sub>2</sub>); [Daicel CHIRALPAK® IA-3 (4.6 mm x 250mm), *n*-hexane/2-propanol = 90/10,  $v = 1.0$  mL·min<sup>-1</sup>,  $\lambda = 254$  nm,  $t$  (major) = 5.9 min,  $t$  (minor) = 13.1 min]; <sup>1</sup>H NMR (400 MHz, CDCl<sub>3</sub>)  $\delta$  0.97 – 1.06 (m, 21H), 2.40 (s, 3H), 2.58 (s, 3H), 3.23 – 3.35 (m, 1H), 3.60 – 3.72 (m, 2H), 3.85 (dd,  $J = 6.2, 9.6$  Hz, 1H), 3.93 (dd,  $J = 4.9, 9.6$  Hz, 1H), 7.24 (d,  $J = 8.0$  Hz, 2H), 7.37 (t,  $J = 7.7$  Hz, 1H), 7.52 (d,  $J = 7.7$  Hz, 1H), 7.78 (d,  $J = 7.7$  Hz, 1H), 7.85 (d,  $J = 8.1$  Hz, 2H), 7.89 (s, 1H); <sup>13</sup>C NMR (100 MHz, CDCl<sub>3</sub>)  $\delta$  12.0, 18.0, 21.7, 26.7, 40.4, 43.8, 67.2, 126.8, 127.7, 128.3, 128.5, 129.3, 133.3, 134.7, 137.2, 143.3, 143.9, 198.3, 198.4; HRMS (ESI- quadrupole)  $m/z$  calcd. for C<sub>28</sub>H<sub>41</sub>O<sub>3</sub>Si [M+H]<sup>+</sup>: 453.2819, found: 453.2819.

**(S)-3-(3-acetyl-4-chlorophenyl)-1-(*p*-tolyl)-4-((triisopropylsilyl)oxy)butan-1-one (3x)**

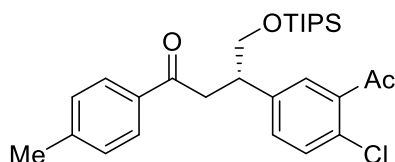

Colorless oil; 31 mg, 63% yield; 94:6 er;  $[\alpha]_D^{20.0} = -15.1$  (0.1, CH<sub>2</sub>Cl<sub>2</sub>); [Daicel CHIRALPAK® IA-3 (4.6 mm x 250mm), *n*-hexane/2-propanol = 90/10,  $v = 1.0$  mL·min<sup>-1</sup>,  $\lambda = 254$  nm,  $t$  (major) = 6.7 min,  $t$  (minor) = 13.0 min]; <sup>1</sup>H NMR (400 MHz,

CDCl<sub>3</sub>)  $\delta$  0.97 – 1.07 (m, 21H), 2.40 (s, 3H), 2.62 (s, 3H), 3.22 (dd,  $J$  = 6.8, 16.0 Hz, 1H), 3.54 – 3.67 (m, 2H), 3.81 (dd,  $J$  = 5.9, 9.7 Hz, 1H), 3.90 (dd,  $J$  = 5.0, 9.6 Hz, 1H), 7.24 (d,  $J$  = 8.0 Hz, 2H), 7.28 – 7.37 (m, 2H), 7.48 (d,  $J$  = 1.9 Hz, 1H), 7.83 (d,  $J$  = 8.2 Hz, 2H); <sup>13</sup>C NMR (100 MHz, CDCl<sub>3</sub>)  $\delta$  12.0, 18.0, 21.7, 30.8, 40.3, 43.2, 67.0, 128.2, 129.0, 129.3, 129.4, 130.5, 132.1, 134.6, 138.9, 142.1, 144.0, 198.1, 200.7; HRMS (ESI- quadrupole)  $m/z$  calcd. for C<sub>28</sub>H<sub>39</sub>ClO<sub>3</sub>Si [M+H]<sup>+</sup>: 487.2430, found: 487.2433.

**(S)-3-(4-(cyclopropanecarbonyl)-3-methylphenyl)-1-(p-tolyl)-4-((triisopropylsilyl)oxy)butan-1-one (3y)**

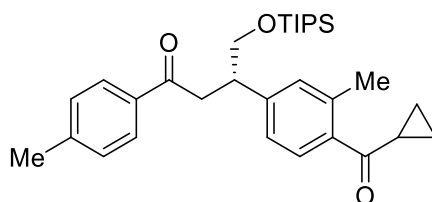

Colorless oil; 36 mg, 76% yield; 94:6 er;  $[\alpha]_D^{20.0}$  = -9.6 (0.1, CH<sub>2</sub>Cl<sub>2</sub>); [Daicel CHIRALPAK® IA-3 (4.6 mm x 250mm), *n*-hexane/2-propanol = 90/10,  $v$  = 1.0 mL·min<sup>-1</sup>,  $\lambda$  = 254 nm,  $t$  (major) = 6.0 min,  $t$  (minor) = 11.6 min]; <sup>1</sup>H NMR (400 MHz, CDCl<sub>3</sub>)  $\delta$  <sup>1</sup>H NMR (400 MHz, CDCl<sub>3</sub>)  $\delta$  0.97 – 1.04 (m, 21H), 1.05 – 1.08 (m, 2H), 1.18 – 1.21 (m, 2H), 2.38 – 2.41 (m, 1H), 2.40 (s, 3H), 2.45 (s, 3H), 3.26 (dd,  $J$  = 7.7, 16.6 Hz, 1H), 3.52 – 3.61 (m, 1H), 3.67 (dd,  $J$  = 5.7, 16.7 Hz, 1H), 3.81 (dd,  $J$  = 6.9, 9.5 Hz, 1H), 3.92 (dd,  $J$  = 4.9, 9.5 Hz, 1H), 7.14 – 7.21 (m, 2H), 7.24 (d,  $J$  = 8.9 Hz, 2H), 7.65 (d,  $J$  = 7.9 Hz, 1H), 7.86 (d,  $J$  = 8.0 Hz, 2H); <sup>13</sup>C NMR (100 MHz, CDCl<sub>3</sub>)  $\delta$  11.8, 12.0, 18.1, 20.5, 21.0, 21.7, 40.4, 43.8, 67.2, 125.3, 128.3, 128.8, 129.3, 131.4, 134.8, 137.3, 137.9, 143.8, 145.8, 198.5, 204.8; HRMS (ESI- quadrupole)  $m/z$  calcd. for C<sub>31</sub>H<sub>45</sub>O<sub>3</sub>Si [M+H]<sup>+</sup>: 493.3132, found: 493.3129.

**(S)-3-(3-methyl-4-propionylphenyl)-1-(p-tolyl)-4-((triisopropylsilyl)oxy)butan-1-one (3z)**

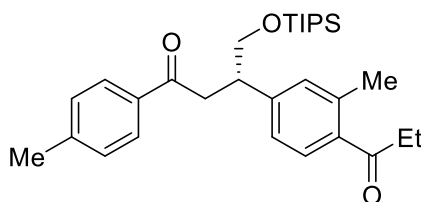

Colorless oil; 35 mg, 72% yield; 94:6 er;  $[\alpha]_D^{20.0}$  = -10.1 (0.1, CH<sub>2</sub>Cl<sub>2</sub>); [Daicel CHIRALPAK® IA-3 (4.6 mm x 250mm), *n*-hexane/2-propanol = 90/10,  $v$  = 1.0

mL·min<sup>-1</sup>,  $\lambda$  = 254 nm, t (major) = 5.9 min, t (minor) = 9.8 min]; <sup>1</sup>H NMR (400 MHz, Chloroform-*d*)  $\delta$  0.98 – 1.08 (m, 21H), 1.17 (t, *J* = 7.3 Hz, 3H), 2.40 (s, 3H), 2.47 (s, 3H), 2.88 (q, *J* = 7.2 Hz, 2H), 3.26 (dd, *J* = 7.7, 16.7 Hz, 1H), 3.53 – 3.60 (m, *J* = 6.2 Hz, 1H), 3.66 (dd, *J* = 5.8, 16.7 Hz, 1H), 3.81 (dd, *J* = 6.8, 9.6 Hz, 1H), 3.91 (dd, *J* = 5.1, 9.6 Hz, 1H), 7.17 (d, *J* = 6.5 Hz, 2H), 7.24 (d, *J* = 8.0 Hz, 2H), 7.58 (d, *J* = 8.5 Hz, 1H), 7.85 (d, *J* = 8.1 Hz, 2H); <sup>13</sup>C NMR (100 MHz, CDCl<sub>3</sub>)  $\delta$  8.5, 12.0, 18.0, 21.6, 21.7, 34.5, 40.3, 43.8, 67.1, 125.4, 128.3, 128.8, 129.3, 131.8, 134.7, 136.1, 138.4, 143.8, 146.2, 198.5, 204.5; HRMS (ESI- quadrupole) *m/z* calcd. for C<sub>30</sub>H<sub>45</sub>O<sub>3</sub>Si [M+H]<sup>+</sup>: 481.3132, found: 481.3133.

**(*S*)-3-(3-methyl-4-(2-phenylacetyl)phenyl)-1-(*p*-tolyl)-4-((triisopropylsilyl)oxy)butan-1-one (za)**

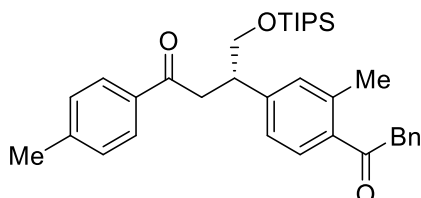

Colorless oil; 39 mg, 72% yield; 95:5 er;  $[\alpha]_D^{20.0} = -12.9$  (0.1, CH<sub>2</sub>Cl<sub>2</sub>); [Daicel CHIRALPAK® IA-3 (4.6 mm x 250mm), *n*-hexane/2-propanol = 90/10, *v* = 1.0 mL·min<sup>-1</sup>,  $\lambda$  = 254 nm, t (major) = 9.8 min, t (minor) = 15.6 min]; <sup>1</sup>H NMR (400 MHz, CDCl<sub>3</sub>)  $\delta$  0.96 – 1.06 (m, 21H), 2.40 (s, 3H), 2.44 (s, 3H), 3.25 (dd, *J* = 7.5, 16.6 Hz, 1H), 3.52 – 3.60 (m, 1H), 3.64 (dd, *J* = 5.9, 16.6 Hz, 1H), 3.81 (dd, *J* = 6.5, 9.7 Hz, 1H), 3.91 (dd, *J* = 5.1, 9.7 Hz, 1H), 4.18 (s, 2H), 7.14 – 7.21 (m, 3H), 7.23 (d, *J* = 9.2 Hz, 4H), 7.30 (t, *J* = 6.8 Hz, 2H), 7.68 (d, *J* = 7.9 Hz, 1H), 7.85 (d, *J* = 8.0 Hz, 2H); <sup>13</sup>C NMR (100 MHz, CDCl<sub>3</sub>)  $\delta$  12.0, 18.0, 21.7, 21.8, 40.3, 43.8, 48.2, 67.1, 125.4, 126.8, 128.3, 128.6, 129.2, 129.3, 129.6, 132.0, 134.7, 134.8, 135.6, 139.2, 143.9, 146.6, 198.4, 200.8; HRMS (ESI- quadrupole) *m/z* calcd. for C<sub>35</sub>H<sub>47</sub>O<sub>3</sub>Si [M+H]<sup>+</sup>: 543.3289, found: 543.3286.

**(*S*)-3-(4-acetyl-3-fluorophenyl)-1-(*p*-tolyl)-4-((triisopropylsilyl)oxy)butan-1-one (3zb)**

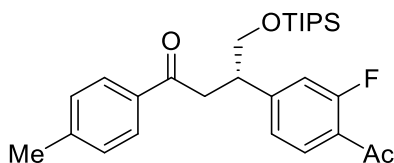

Colorless oil; 32 mg, 69% yield; 92:8 er;  $[\alpha]_{\text{D}}^{20.0} = -21.5$  (0.1,  $\text{CH}_2\text{Cl}_2$ ); [Daicel CHIRALPAK® IA-3 (4.6 mm x 250mm), *n*-hexane/2-propanol = 90/10,  $v = 1.0$  mL·min<sup>-1</sup>,  $\lambda = 254$  nm,  $t$  (major) = 5.8 min,  $t$  (minor) = 8.5 min]; <sup>1</sup>H NMR (400 MHz,  $\text{CDCl}_3$ )  $\delta$  0.96 – 1.07 (m, 21H), 2.40 (s, 3H), 2.60 (d,  $J = 4.5$  Hz, 3H), 3.27 (dd,  $J = 9.6, 18.7$  Hz, 1H), 3.62 (m, 2H), 3.84 (dd,  $J = 5.6, 9.6$  Hz, 1H), 3.93 (dd,  $J = 4.7, 9.6$  Hz, 1H), 7.10 (d,  $J = 12.4$  Hz, 1H), 7.15 (d,  $J = 8.1$  Hz, 1H), 7.25 (d,  $J = 8.1$  Hz, 2H), 7.79 (t,  $J = 7.9$  Hz, 1H), 7.84 (d,  $J = 7.8$  Hz, 2H); <sup>13</sup>C NMR (100 MHz,  $\text{CDCl}_3$ )  $\delta$  12.0, 18.0, 21.7, 31.4 (d, C-F,  $J_{\text{C-F}} = 7.4$  Hz), 40.1, 43.6, 66.8, 116.4 (d, C-F,  $^2J_{\text{C-F}} = 24.0$  Hz), 123.9 (d, C-F,  $^2J_{\text{C-F}} = 12.9$  Hz), 124.2 (d,  $^4J_{\text{C-F}} = 2.9$  Hz), 128.2, 129.4, 130.5 (d,  $^3J_{\text{C-F}} = 2.9$  Hz), 134.6, 144.1, 151.2 (d, C-F,  $^3J_{\text{C-F}} = 8.4$  Hz), 162.3 (d, C-F,  $^1J_{\text{C-F}} = 254.9$  Hz), 195.7, 197.9; HRMS (ESI- quadrupole)  $m/z$  calcd. for  $\text{C}_{28}\text{H}_{40}\text{FO}_3\text{Si}$   $[\text{M}+\text{H}]^+$ : 471.2725, found: 471.2720.

**(*S*)-3-(4-acetyl-3-chlorophenyl)-1-(*p*-tolyl)-4-((triisopropylsilyl)oxy)butan-1-one**  
**(3zc)**

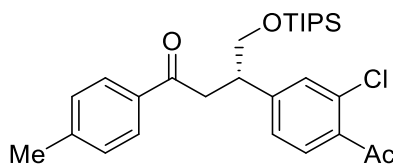

Colorless oil; 35 mg, 71% yield; 91:9 er;  $[\alpha]_{\text{D}}^{20.0} = -16.7$  (0.1,  $\text{CH}_2\text{Cl}_2$ ); [Daicel CHIRALPAK® IA-3 (4.6 mm x 250mm), *n*-hexane/2-propanol = 90/10,  $v = 1.0$  mL·min<sup>-1</sup>,  $\lambda = 254$  nm,  $t$  (major) = 5.7 min,  $t$  (minor) = 8.3 min]; <sup>1</sup>H NMR (400 MHz,  $\text{CDCl}_3$ )  $\delta$  0.96 – 1.07 (m, 21H), 2.41 (s, 3H), 2.62 (s, 3H), 3.20 – 3.32 (dd,  $J = 6.4, 16.0$  Hz, 1H), 3.54 – 3.67 (m, 2H), 3.83 (dd,  $J = 5.4, 9.7$  Hz, 1H), 3.92 (dd,  $J = 4.6, 9.5$  Hz, 1H), 7.25 (d,  $J = 9.0$  Hz, 3H), 7.39 (s, 1H), 7.51 (d,  $J = 7.9$  Hz, 1H), 7.85 (d,  $J = 7.9$  Hz, 2H); <sup>13</sup>C NMR (100 MHz,  $\text{CDCl}_3$ )  $\delta$  12.0, 18.0, 21.7, 30.7, 40.1, 43.3, 66.8, 126.9, 128.2, 129.4, 129.8, 130.5, 131.6, 134.6, 137.0, 144.1, 148.0, 197.9, 200.0; HRMS (ESI- quadrupole)  $m/z$  calcd. for  $\text{C}_{28}\text{H}_{40}\text{ClO}_3\text{Si}$   $[\text{M}+\text{H}]^+$ : 487.2430, found: 487.2433.

**(*S*)-3-(3-methyl-4-formylphenyl)-1-(*p*-tolyl)-4-((triisopropylsilyl)oxy)butan-1-one**  
**(3zd)**

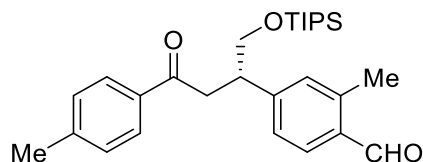

Colorless oil; 30 mg, 66% yield; 94:6 er;  $[\alpha]_{\text{D}}^{20.0} = -12.9$  (0.1,  $\text{CH}_2\text{Cl}_2$ ); [Daicel CHIRALPAK® IA-3 (4.6 mm x 250mm), *n*-hexane/2-propanol = 90/10,  $v = 1.0$   $\text{mL} \cdot \text{min}^{-1}$ ,  $\lambda = 254$  nm,  $t$  (major) = 6.1 min,  $t$  (minor) = 8.8 min];  $^1\text{H}$  NMR (400 MHz,  $\text{CDCl}_3$ )  $\delta$  0.98 – 1.06 (m, 21H), 2.40 (s, 3H), 2.63 (s, 3H), 3.28 (dd,  $J = 7.1, 16.3$  Hz, 1H), 3.56 – 3.69 (m, 2H), 3.84 (dd,  $J = 6.1, 9.7$  Hz, 1H), 3.93 (dd,  $J = 5.0, 9.6$  Hz, 1H), 7.20 (s, 1H), 7.24 (d,  $J = 8.0$  Hz, 2H), 7.28 (d,  $J = 8.0$  Hz, 1H), 7.70 (d,  $J = 8.0$  Hz, 1H), 7.85 (d,  $J = 8.2$  Hz, 2H), 10.20 (s, 1H);  $^{13}\text{C}$  NMR (100 MHz,  $\text{CDCl}_3$ )  $\delta$  12.0, 18.0, 19.7, 21.7, 40.2, 44.0, 67.0, 126.1, 128.3, 129.3, 131.8, 132.4, 132.9, 134.6, 140.6, 144.0, 149.2, 192.5, 198.2; HRMS (ESI- quadrupole)  $m/z$  calcd. for  $\text{C}_{28}\text{H}_{41}\text{O}_3\text{Si}$   $[\text{M}+\text{H}]^+$ : 453.2819, found: 453.2821.

**(S)-3-(3-fluoro-4-formylphenyl)-1-(*p*-tolyl)-4-((triisopropylsilyl)oxy)butan-1-one**  
**(3ze)**

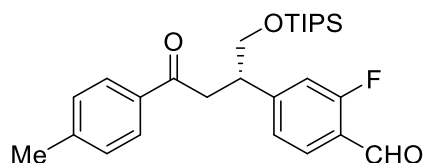

Colorless oil; 23 mg, 51% yield; 88:12 er;  $[\alpha]_{\text{D}}^{20.0} = -7.2$  (0.1,  $\text{CH}_2\text{Cl}_2$ ); [Daicel CHIRALPAK® IA-3 (4.6 mm x 250mm), *n*-hexane/2-propanol = 90/10,  $v = 1.0$   $\text{mL} \cdot \text{min}^{-1}$ ,  $\lambda = 254$  nm,  $t$  (major) = 5.9 min,  $t$  (minor) = 8.5 min];  $^1\text{H}$  NMR (400 MHz,  $\text{CDCl}_3$ )  $\delta$  0.98 – 1.08 (m, 21H), 2.41 (s, 3H), 3.29 (dd,  $J = 9.6, 19.2$  Hz, 1H), 3.59 – 3.67 (m, 2H), 3.86 (dd,  $J = 5.4, 9.7$  Hz, 1H), 3.94 (dd,  $J = 5.0, 9.8$  Hz, 1H), 7.14 (d,  $J = 11.6$  Hz, 1H), 7.21 (d,  $J = 8.0$ , 1H), 7.25 (d,  $J = 8.3$ , 2H), 7.78 (t,  $J = 7.6$  Hz, 1H), 7.84 (d,  $J = 8.1$  Hz, 2H), 10.30 (s, 1H);  $^{13}\text{C}$  NMR (100 MHz,  $\text{CDCl}_3$ )  $\delta$  12.0, 18.0, 21.7, 40.0, 43.9, 66.7, 116.2 (d, C-F,  $^2J_{\text{C-F}} = 20.6$  Hz), 122.6 (d, C-F,  $^3J_{\text{C-F}} = 8.1$  Hz), 124.6 (d, C-F,  $^3J_{\text{C-F}} = 3.1$  Hz), 128.2, 128.6 (d, C-F,  $^4J_{\text{C-F}} = 2.3$  Hz), 129.4, 134.5, 144.2, 153.2 (d, C-F,  $^2J_{\text{C-F}} = 8.4$  Hz), 164.7 (d, C-F,  $^1J_{\text{C-F}} = 258.5$  Hz), 187.0 (d, C-F,  $J_{\text{C-F}} = 6.2$  Hz), 197.7; HRMS (ESI- quadrupole)  $m/z$  calcd. for  $\text{C}_{27}\text{H}_{38}\text{FO}_3\text{Si}$   $[\text{M}+\text{H}]^+$ : 457.2569, found: 457.2568.



**(S)-3-(4-cyano-3-methylphenyl)-1-(p-tolyl)-4-((triisopropylsilyl)oxy)butan-1-one (3zf)**

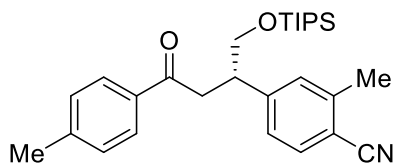

Colorless oil; 28 mg, 63% yield; 94.5:5.5 er;  $[\alpha]_{\text{D}}^{20.0} = -12.5$  (0.1,  $\text{CH}_2\text{Cl}_2$ ); [Daicel CHIRALPAK® IA-3 (4.6 mm x 250mm), *n*-hexane/2-propanol = 70/30,  $v = 1.0$  mL·min<sup>-1</sup>,  $\lambda = 254$  nm,  $t$  (major) = 4.4 min,  $t$  (minor) = 5.9 min]; <sup>1</sup>H NMR (400 MHz,  $\text{CDCl}_3$ )  $\delta$  0.96 – 1.04 (m, 21H), 2.41 (s, 3H), 2.50 (s, 3H), 3.26 (dd,  $J = 6.8, 16.0$  Hz, 1H), 3.53 – 3.66 (m, 2H), 3.82 (dd,  $J = 5.8, 9.7$  Hz, 1H), 3.90 (dd,  $J = 5.0, 9.6$  Hz, 1H), 7.19 (d,  $J = 8.0$  Hz, 1H), 7.22 – 7.27 (m, 3H), 7.50 (d,  $J = 8.0$  Hz, 1H), 7.84 (d,  $J = 8.1$  Hz, 2H); <sup>13</sup>C NMR (100 MHz,  $\text{CDCl}_3$ )  $\delta$  12.0, 18.0, 20.6, 21.7, 40.0, 43.8, 66.9, 110.8, 118.4, 126.1, 128.2, 129.4, 130.3, 132.5, 134.5, 141.8, 144.1, 148.3, 198.0; HRMS (ESI- quadrupole)  $m/z$  calcd. for  $\text{C}_{28}\text{H}_{40}\text{NO}_2\text{Si}$   $[\text{M}+\text{H}]^+$ : 450.2823, found: 450.2827.

**(S)-3-(4-cyano-3-fluorophenyl)-1-(p-tolyl)-4-((triisopropylsilyl)oxy)butan-1-one (3zg)**

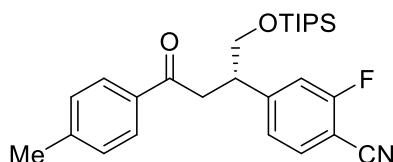

Colorless oil; 26 mg, 57% yield; 92:8 er;  $[\alpha]_{\text{D}}^{20.0} = -9.5$  (0.1,  $\text{CH}_2\text{Cl}_2$ ); [Daicel CHIRALPAK® IA-3 (4.6 mm x 250mm), *n*-hexane/2-propanol = 90/10,  $v = 1.0$  mL·min<sup>-1</sup>,  $\lambda = 254$  nm,  $t$  (major) = 6.6 min,  $t$  (minor) = 11.0 min]; <sup>1</sup>H NMR (400 MHz,  $\text{CDCl}_3$ )  $\delta$  0.96 – 1.07 (m, 21H), 2.41 (s, 3H), 3.28 (dd,  $J = 7.2, 16.4$  Hz, 1H), 3.54 – 3.67 (m, 2H), 3.85 (dd,  $J = 5.2, 9.7$  Hz, 1H), 3.93 (dd,  $J = 5.1, 9.7$  Hz, 1H), 7.20 (dd,  $J = 6.0, 7.9$  Hz, 2H), 7.25 (d,  $J = 7.6$  Hz, 2H), 7.52 (t,  $J = 7.2$  Hz, 1H), 7.83 (d,  $J = 8.2$  Hz, 2H); <sup>13</sup>C NMR (100 MHz,  $\text{CDCl}_3$ )  $\delta$  11.9, 18.0, 21.7, 39.9, 43.7, 66.6, 99.3 (d, C-F,  $^2J_{\text{C-F}} = 15.5$  Hz), 114.2, 116.2 (d, C-F,  $^2J_{\text{C-F}} = 19.5$  Hz), 124.9 (d, C-F,  $^3J_{\text{C-F}} = 3.3$  Hz), 128.2, 129.4, 133.1, 134.3, 144.3, 152.0 (d, C-F,  $^3J_{\text{C-F}} = 7.6$  Hz), 163.1 (d, C-F,  $^1J_{\text{C-F}} = 258.4$  Hz), 197.4; HRMS (ESI- quadrupole)  $m/z$  calcd. for  $\text{C}_{27}\text{H}_{37}\text{FNO}_2\text{Si}$   $[\text{M}+\text{H}]^+$ : 454.2572, found: 454.2574.

**(S)-3-(4-cyano-3-chlorophenyl)-1-(p-tolyl)-4-((triisopropylsilyl)oxy)butan-1-one**

**(3zh)**

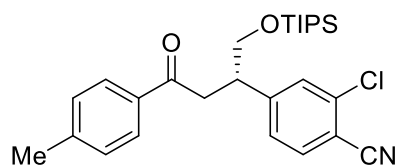

Colorless oil; 23 mg, 50% yield; 88:12 er;  $[\alpha]_{\text{D}}^{20.0} = -8.1$  (0.1,  $\text{CH}_2\text{Cl}_2$ ); [Daicel CHIRALPAK® IA-3 (4.6 mm x 250mm), *n*-hexane/2-propanol = 90/10,  $v = 1.0 \text{ mL} \cdot \text{min}^{-1}$ ,  $\lambda = 254 \text{ nm}$ ,  $t$  (major) = 6.6 min,  $t$  (minor) = 10.5 min];  $^1\text{H NMR}$  (400 MHz,  $\text{CDCl}_3$ )  $\delta$  0.97 – 1.08 (m, 21H), 2.41 (s, 3H), 3.28 (dd,  $J = 9.6, 19.2 \text{ Hz}$ , 1H), 3.53 – 3.65 (m, 2H), 3.85 (dd,  $J = 4.9, 9.7 \text{ Hz}$ , 1H), 3.92 (dd,  $J = 5.0, 9.7 \text{ Hz}$ , 1H), 7.25 (d,  $J = 7.4 \text{ Hz}$ , 2H), 7.31 (d,  $J = 8.0 \text{ Hz}$ , 1H), 7.50 (s, 1H), 7.57 (d,  $J = 8.0 \text{ Hz}$ , 1H), 7.83 (d,  $J = 8.1 \text{ Hz}$ , 2H);  $^{13}\text{C NMR}$  (100 MHz,  $\text{CDCl}_3$ )  $\delta$  11.9, 18.0, 21.7, 39.8, 43.5, 66.6, 111.3, 116.2, 127.3, 128.2, 129.4, 129.9, 133.7, 134.3, 136.6, 144.3, 150.5, 197.4; HRMS (ESI- quadrupole)  $m/z$  calcd. for  $\text{C}_{27}\text{H}_{37}\text{ClNO}_2\text{Si}$   $[\text{M}+\text{H}]^+$ : 470.2277, found: 470.2275.  
**(S)-5-(4-oxo-4-(*p*-tolyl)-1-((triisopropylsilyl)oxy)butan-2-yl)-2,3-dihydro-1H-inden-1-one (3zi)**

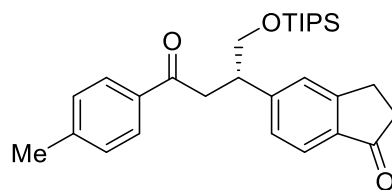

Colorless oil; 37 mg, 80% yield; 94:6 er;  $[\alpha]_{\text{D}}^{20.0} = -11.3$  (0.1,  $\text{CH}_2\text{Cl}_2$ ); [Daicel CHIRALPAK® IA-3 (4.6 mm x 250mm), *n*-hexane/2-propanol = 90/10,  $v = 1.0 \text{ mL} \cdot \text{min}^{-1}$ ,  $\lambda = 254 \text{ nm}$ ,  $t$  (major) = 10.3 min,  $t$  (minor) = 18.5 min];  $^1\text{H NMR}$  (400 MHz,  $\text{CDCl}_3$ )  $\delta$  0.97 – 1.09 (m, 21H), 2.40 (s, 3H), 2.66 (t,  $J = 5.6 \text{ Hz}$ , 2H), 3.09 (t,  $J = 5.6 \text{ Hz}$ , 2H), 3.31 (dd,  $J = 10.0, 18.4 \text{ Hz}$ , 1H), 3.62 – 3.71 (m, 2H), 3.85 (dd,  $J = 6.2, 9.6 \text{ Hz}$ , 1H), 3.94 (dd,  $J = 4.9, 9.7 \text{ Hz}$ , 1H), 7.24 (d,  $J = 8.0 \text{ Hz}$ , 2H), 7.30 (d,  $J = 7.9 \text{ Hz}$ , 1H), 7.41 (s, 1H), 7.67 (d,  $J = 7.9 \text{ Hz}$ , 1H), 7.85 (d,  $J = 8.2 \text{ Hz}$ , 2H);  $^{13}\text{C NMR}$  (100 MHz,  $\text{CDCl}_3$ )  $\delta$  12.0, 18.0, 21.7, 25.8, 36.5, 40.4, 44.3, 67.1, 123.7, 126.4, 127.5, 128.2, 129.3, 134.6, 135.8, 144.0, 150.3, 155.5, 198.2, 206.7; HRMS (ESI- quadrupole)  $m/z$  calcd. for  $\text{C}_{29}\text{H}_{41}\text{O}_3\text{Si}$   $[\text{M}+\text{H}]^+$ : 465.2819, found: 465.2821.

**(S)-3-(6-acetylnaphthalen-2-yl)-1-(*p*-tolyl)-4-((triisopropylsilyl)oxy)butan-1-one (3zj)**

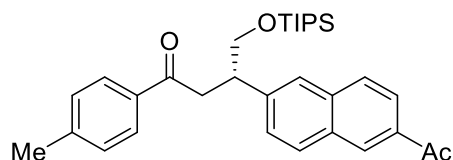

Colorless oil; 28 mg, 56% yield; 94:6 er;  $[\alpha]_{\text{D}}^{20.0} = -11.8$  (0.1,  $\text{CH}_2\text{Cl}_2$ ); [Daicel CHIRALPAK® IA-3 (4.6 mm x 250mm), *n*-hexane/2-propanol = 90/10,  $v = 1.0$  mL·min<sup>-1</sup>,  $\lambda = 254$  nm,  $t$  (major) = 10.5 min,  $t$  (minor) = 17.0 min]; <sup>1</sup>H NMR (400 MHz,  $\text{CDCl}_3$ )  $\delta$  0.96 – 1.08 (m, 21H), 2.40 (s, 3H), 2.71 (s, 3H), 3.38 (dd,  $J = 9.2, 18.4$  Hz, 1H), 3.71 – 3.81 (m, 2H), 3.93 (dd,  $J = 6.1, 9.7$  Hz, 1H), 4.02 (dd,  $J = 4.6, 9.7$  Hz, 1H), 7.24 (d,  $J = 8.0$  Hz, 2H), 7.53 (dd,  $J = 1.7, 8.5$  Hz, 1H), 7.77 (d,  $J = 1.6$  Hz, 1H), 7.81 (d,  $J = 8.6$  Hz, 1H), 7.88 (t,  $J = 8.7$  Hz, 3H), 7.99 (dd,  $J = 1.8, 8.6$  Hz, 1H), 8.41 (d,  $J = 1.7$  Hz, 1H); <sup>13</sup>C NMR (100 MHz,  $\text{CDCl}_3$ )  $\delta$  12.0, 18.0, 21.7, 26.7, 40.6, 44.2, 67.2, 124.0, 126.5, 127.8, 128.2, 128.3, 129.3, 129.6, 130.0, 131.5, 134.2, 134.7, 135.8, 143.4, 143.9, 198.2, 198.5; HRMS (ESI- quadrupole)  $m/z$  calcd. for  $\text{C}_{32}\text{H}_{43}\text{O}_3\text{Si}$   $[\text{M}+\text{H}]^+$ : 503.2976, found: 503.2978.

**isopropyl (S)-2-methyl-2-(4-(4-(4-oxo-4-phenyl-1-((triisopropylsilyl)oxy)butan-2-yl)benzoyl)phenoxy)propanoate (3zk)**

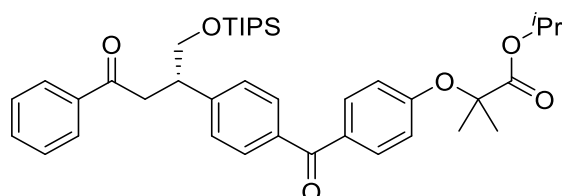

White solid, m.p. = 48-49 °C; 45 mg, 70% yield; 94:6 er;  $[\alpha]_{\text{D}}^{20.0} = -7.9$  (0.1,  $\text{CH}_2\text{Cl}_2$ ); [Daicel CHIRALPAK® IA-3 (4.6 mm x 250mm), *n*-hexane/2-propanol = 90/10,  $v = 1.0$  mL·min<sup>-1</sup>,  $\lambda = 254$  nm,  $t$  (major) = 8.8 min,  $t$  (minor) = 15.9 min]; <sup>1</sup>H NMR (400 MHz,  $\text{CDCl}_3$ )  $\delta$  0.96 – 1.08 (m, 21H), 1.20 (d,  $J = 6.3$  Hz, 6H), 1.65 (s, 6H), 3.28 – 3.41 (m, 1H), 3.62 – 3.75 (m, 2H), 3.87 (dd,  $J = 6.0, 10.0$  Hz, 1H), 3.96 (dd,  $J = 4.7, 9.7$  Hz, 1H), 5.05 – 5.12 (m, 1H), 6.85 (d,  $J = 8.8$  Hz, 2H), 7.39 (d,  $J = 8.1$  Hz, 2H), 7.45 (t,  $J = 7.6$  Hz, 2H), 7.55 (t,  $J = 7.4$  Hz, 1H), 7.67 (d,  $J = 8.1$  Hz, 2H), 7.72 (d,  $J = 8.8$  Hz, 2H), 7.96 (d,  $J = 7.3$  Hz, 2H). <sup>13</sup>C NMR (100 MHz,  $\text{CDCl}_3$ )  $\delta$  12.0, 18.0, 21.6, 25.4, 25.5, 40.5, 44.0, 67.2, 69.4, 79.4, 117.2, 128.0, 128.1, 128.6, 130.0, 130.9, 132.0, 133.1, 136.5, 137.2, 147.1, 159.5, 173.3, 195.3, 198.8; HRMS (ESI- quadrupole)  $m/z$  calcd.

for C<sub>39</sub>H<sub>53</sub>O<sub>6</sub>Si [M+H]<sup>+</sup>: 645.3606, found: 645.3603.

**(R)-4-((3R,5R,8R,9S,10S,13R,14S,17R)-3-methoxy-10,13-dimethylhexadecahydro-1H-cyclopenta[a]phenanthren-17-yl)-1-(4-((S)-4-oxo-4-phenyl-1-((triisopropylsilyl)oxy)butan-2-yl)phenyl)pentan-1-one (3zl)**

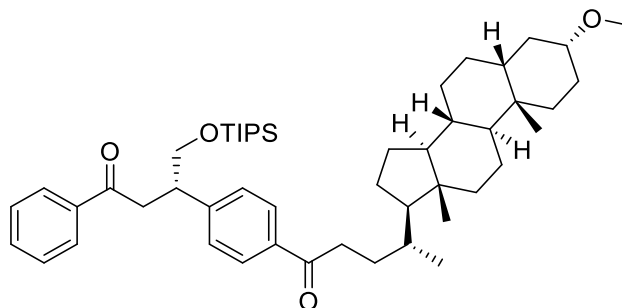

Colorless oil; 49 mg, 63% yield; 94:6 er;  $[\alpha]_D^{20.0} = -20.8$  (0.1, CH<sub>2</sub>Cl<sub>2</sub>); [Daicel CHIRALPAK® IA-3 (4.6 mm x 250mm), *n*-hexane/2-propanol = 85/15,  $v = 1.0$  mL·min<sup>-1</sup>,  $\lambda = 254$  nm,  $t$  (major) = 11.1 min,  $t$  (minor) = 12.3 min]; <sup>1</sup>H NMR (400 MHz, CDCl<sub>3</sub>)  $\delta$  0.64 (s, 3H), 0.80 – 0.92 (m, 5H), 0.96 – 1.07 (m, 21H), 1.09 – 1.15 (m, 5H), 1.18 – 1.33 (m, 7H), 1.34 – 1.51 (m, 7H), 1.63 – 1.97 (m, 8H), 2.77 – 2.89 (m, 1H), 2.90 – 3.01 (m, 1H), 3.13 – 3.19 (m, 1H), 3.26 – 3.34 (m, 1H), 3.35 (s, 3H), 3.60 – 3.76 (m, 2H), 3.80 – 3.88 (m, 1H), 3.94 (dd,  $J = 9.6, 4.5$  Hz, 1H), 7.38 (d,  $J = 8.0$  Hz, 2H), 7.44 (t,  $J = 7.5$  Hz, 2H), 7.55 (t,  $J = 7.3$  Hz, 1H), 7.87 (d,  $J = 8.0$  Hz, 2H), 7.94 (d,  $J = 7.6$  Hz, 2H); <sup>13</sup>C NMR (100 MHz, CDCl<sub>3</sub>)  $\delta$  12.0, 12.2, 18.0, 18.7, 20.9, 23.5, 24.3, 26.5, 26.9, 27.4, 28.3, 30.7, 32.9, 35.0, 35.4, 35.5, 35.6, 36.0, 40.3, 40.4, 40.5, 42.2, 42.9, 44.0, 55.6, 56.1, 56.6, 67.1, 80.5, 128.1, 128.3, 128.4, 128.7, 133.1, 135.7, 137.1, 148.0, 198.8, 200.9. HRMS (ESI- quadrupole)  $m/z$  calcd. for C<sub>50</sub>H<sub>77</sub>O<sub>4</sub>Si [M+H]<sup>+</sup>: 769.5586, found: 769.5582.

**(S)-2-(2-oxo-2-(4-(4-oxo-4-(*p*-tolyl)-1-((triisopropylsilyl)oxy)butan-2-yl)phenyl)-ethyl)dibenzo[b,e]oxepin-11(6H)-one (3zm)**

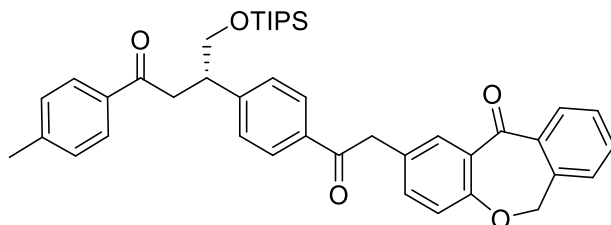

Light-yellow amorphous foam; 44 mg, 68% yield; 95:5 er;  $[\alpha]_D^{20.0} = -12.0$  (0.1, CH<sub>2</sub>Cl<sub>2</sub>); [Daicel CHIRALPAK® IA-3 (4.6 mm x 250mm), *n*-hexane/2-propanol = 60/40,  $v = 1.0$  mL·min<sup>-1</sup>,  $\lambda = 254$  nm,  $t$  (major) = 19.4 min,  $t$  (minor) = 32.2 min]; <sup>1</sup>H NMR (400

MHz, CDCl<sub>3</sub>)  $\delta$  0.95 – 1.08 (m, 21H), 2.40 (s, 3H), 3.28 (dd,  $J$  = 9.6, 18.8 Hz, 1H), 3.58 – 3.73 (m, 2H), 3.84 (dd,  $J$  = 6.1, 9.6 Hz, 1H), 3.93 (dd,  $J$  = 4.9, 9.7 Hz, 1H), 4.27 (s, 2H), 5.18 (s, 2H), 7.02 (d,  $J$  = 8.4 Hz, 1H), 7.24 (d,  $J$  = 8.0 Hz, 2H), 7.38 (m, 4H), 7.46 (t,  $J$  = 7.1 Hz, 1H), 7.55 (t,  $J$  = 7.8 Hz, 1H), 7.84 (d,  $J$  = 8.1 Hz, 2H), 7.89 (d,  $J$  = 7.5 Hz, 1H), 7.94 (d,  $J$  = 8.2 Hz, 2H), 8.11 (s, 1H); <sup>13</sup>C NMR (100 MHz, CDCl<sub>3</sub>)  $\delta$  12.0, 18.0, 21.7, 40.3, 44.0, 44.3, 67.0, 73.7, 121.1, 125.3, 127.8, 128.2, 128.5, 128.6, 128.7, 129.2, 129.3, 129.6, 132.7, 132.8, 134.6, 134.9, 135.7, 136.7, 140.6, 143.9, 148.8, 160.4, 190.9, 197.0, 198.3; HRMS (ESI- quadrupole)  $m/z$  calcd. for C<sub>42</sub>H<sub>49</sub>O<sub>5</sub>Si [M+H]<sup>+</sup>: 661.3344, found: 661.3345.

## Derivatization of chiral $\beta$ -aryl ketones

### Large-scale experiment

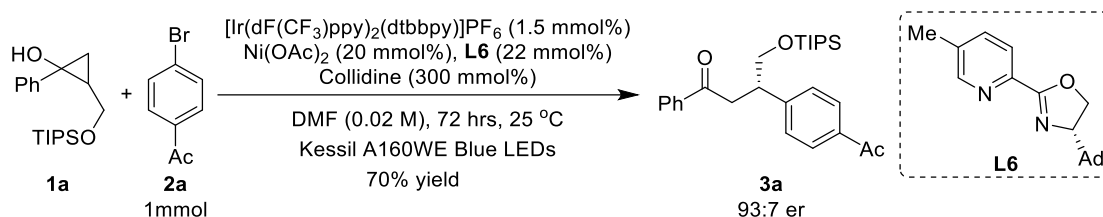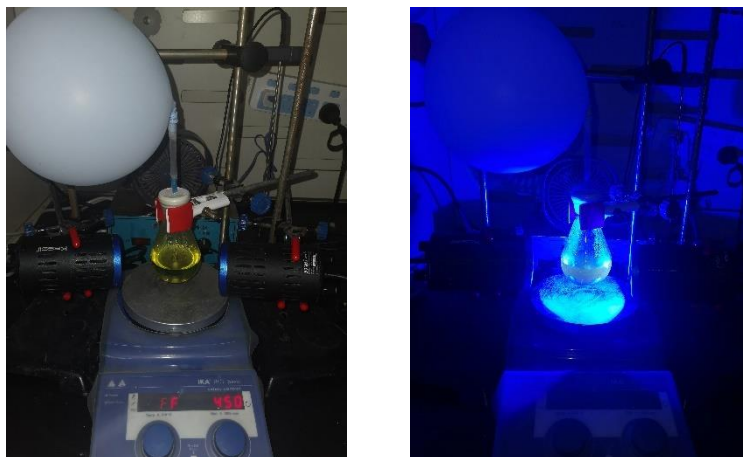

**Figure S3: Set-up for large scale reaction under blue LEDs irradiation.**

To a 100 mL round bottomed flask was added  $[\text{Ir}(\text{dFCF}_3\text{ppy})_2\text{dtbbpy}]\text{PF}_6$  (16.9 mg, 0.015 mmol, 1.5 mmol%), Nickel(II) acetate (35.5 mg, 0.2 mmol, 20 mmol%), **L6** (65.5 mg, 0.22 mmol, 22 mmol%), followed by **2a** (200 mg, 1 mmol). The reaction flask was sealed, evacuated and backfilled with nitrogen three times, then degassed DMF (50 mL) was injected under nitrogen protection, stirred at room temperature for 30 min. Cyclopropanol **1a** (0.97 g, 3 mmol) and collidine (0.365 g, 0.4 mL, 3 mmol) was injected *via* syringe respectively. The reaction mixture was degassed by Freeze-Pump-Thaw methods for three cycles, then stirred under nitrogen atmosphere with the irradiated of two Kessil® A160WE blue LED lamps (5 cm away from reaction flask) at room temperature (cooled by fan) for 72 h. The reaction mixture was poured into water (150 mL), then added EA (30 mL) to the mixture, stirred for 20 min. The organic layer was separated and the aqueous layer was extracted with EA (20 mL $\times$ 2). Combined of the organic layer was washed by brine, dried over anhydrous  $\text{Na}_2\text{SO}_4$ . The solvent was removed under reduced pressure and the residue was purified by column

chromatography on silica gel (petroleum ether /ethyl acetate = 100:1 to 20:1 as the eluent) to afford **3a**.

Colorless oil; 308 mg, 70% yield; 93:7 er;  $[\alpha]_D^{20.0} = -12.0$  (0.1, CH<sub>2</sub>Cl<sub>2</sub>); [Daicel CHIRALPAK® IA-3 (4.6 mm x 250mm), *n*-hexane/2-propanol = 70/30,  $v = 1.0$  mL·min<sup>-1</sup>,  $\lambda = 254$  nm,  $t$  (major) = 7.0 min,  $t$  (minor) = 12.4 min]; <sup>1</sup>H NMR (400 MHz, CDCl<sub>3</sub>)  $\delta$  0.95 – 1.08 (m, 21H), 2.57 (s, 3H), 3.31 (dd,  $J = 15.9, 5.7$  Hz, 1H), 3.58 – 3.76 (m, 2H), 3.81 – 3.90 (m, 1H), 3.91 – 3.99 (m, 1H), 7.39 (d,  $J = 7.0$  Hz, 2H), 7.45 (t,  $J = 7.2$  Hz, 2H), 7.55 (t,  $J = 7.3$  Hz, 1H), 7.88 (d,  $J = 6.9$  Hz, 2H), 7.94 (d,  $J = 7.6$  Hz, 2H); <sup>13</sup>C NMR (100 MHz, CDCl<sub>3</sub>)  $\delta$  12.0, 18.0, 26.6, 40.5, 44.0, 67.1, 128.1, 128.4, 128.5, 128.7, 133.1, 135.7, 137.1, 148.3, 197.9, 198.7; HRMS (ESI- quadrupole)  $m/z$  calcd. for C<sub>27</sub>H<sub>39</sub>O<sub>3</sub>Si [M+H]<sup>+</sup>: 439.2663, found: 439.2666.

### Deprotection of TIPS

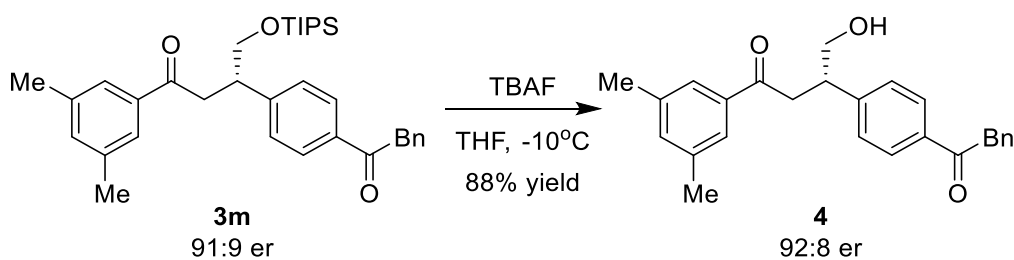

To a solution of **3m** (30 mg, 0.05 mmol) in anhydrous THF (2 mL) was added TBAF (78  $\mu$ L, 0.08 mmol, 1.5 eq., 1M in THF) at -10 °C. The reaction was stirred at -10 °C for 2 hrs. After that, the reaction mixture was concentrated under reduced pressure, the residue was purified by column chromatography on silica gel (petroleum ether/ethyl acetate = 10:1 to 2:1 as the eluent) quickly to afford product **4** (19 mg, 88% yield) as amorphous foam (Note: Product **4** should be stored at -20 °C).

### (S)-1-(3,5-dimethylphenyl)-4-hydroxy-3-(4-(2-phenylacetyl)phenyl)butan-1-one

#### (4)

Amorphous foam; 19 mg, 88% yield; 92:8 er;  $[\alpha]_D^{20.0} = -14.4$  (0.1, CH<sub>2</sub>Cl<sub>2</sub>); [Daicel CHIRALPAK® IA-3 (4.6 mm x 250mm), *n*-hexane/2-propanol = 60/40,  $v = 1.0$  mL·min<sup>-1</sup>,  $\lambda = 254$  nm,  $t$  (major) = 13.5 min,  $t$  (minor) = 18.2 min]; <sup>1</sup>H NMR (400 MHz, CDCl<sub>3</sub>)  $\delta$  2.35 (s, 6H), 3.36 (dd,  $J = 6.7, 17.3$  Hz, 1H), 3.47 (dd,  $J = 6.9, 17.3$  Hz, 1H), 3.62 – 3.72 (m, 1H), 3.80 – 3.92 (m, 2H), 4.25 (s, 2H), 7.19 (s, 1H), 7.22 – 7.28 (m,

3H), 7.32 (t,  $J = 6.7$  Hz, 2H), 7.39 (d,  $J = 8.0$  Hz, 2H), 7.54 (s, 2H), 7.98 (d,  $J = 7.9$  Hz, 2H);  $^{13}\text{C}$  NMR (100 MHz,  $\text{CDCl}_3$ )  $\delta$  21.3, 41.1, 43.5, 45.6, 66.7, 126.0, 127.0, 128.3, 128.8, 129.2, 129.5, 134.6, 135.0, 135.4, 136.9, 138.4, 147.9, 197.2, 199.0; HRMS (ESI- quadrupole)  $m/z$  calcd. for  $\text{C}_{26}\text{H}_{27}\text{O}_3$   $[\text{M}+\text{H}]^+$ : 387.1955, found: 387.1951.

### Synthesis of *ent*-calyxolane B analog

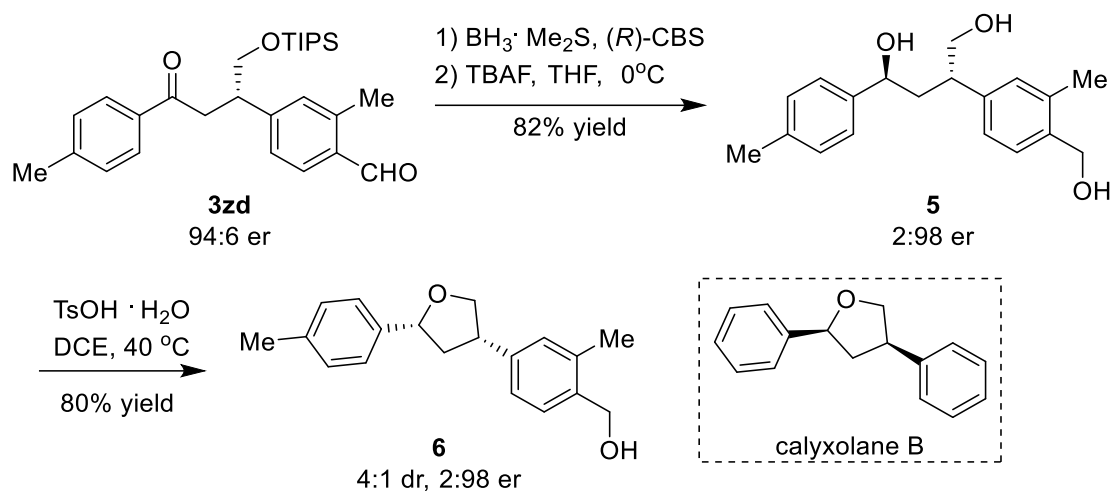

### (1*S*,3*S*)-3-(4-(hydroxymethyl)-3-methylphenyl)-1-(*p*-tolyl)butane-1,4-diol (5)

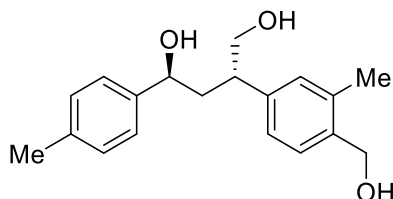

To a solution of (*R*)-CBS (7.4 mg, 0.026 mmol) in anhydrous THF (2 mL) was added  $\text{BH}_3 \cdot \text{Me}_2\text{S}$  (133  $\mu\text{L}$ , 0.266 mmol, 4.0 eq., 2M in THF) at  $0^\circ\text{C}$  with nitrogen protection, stirred for a while. To the mixture was added a solution of **3zd** (30.0 mg, 0.066 mmol) in anhydrous THF (1 mL) slowly. After the addition, the reaction was allowed to stirred at room temperature for 3 h. The reaction was cooled to  $0^\circ\text{C}$ , added methanol (1 mL) slowly, followed by brine (10 mL). The mixture was extracted by EA (10 mL $\times$ 2). The combined organic layer was washed with brine, dried over anhydrous  $\text{Na}_2\text{SO}_4$ . The organic layer was concentrated to dryness and the residue was purified by column chromatography on silica gel (petroleum ether/ethyl acetate = 10:1 to 2:1 as the eluent) to afford the intermediate (26.5 mg) as colorless oil. The intermediate (26.5 mg, 0.058 mmol) was dissolved in anhydrous THF (2 mL), then TBAF (87  $\mu\text{L}$ , 0.087 mmol, 1.5 eq., 1M in THF) was added to the reaction at  $0^\circ\text{C}$ , stirred at  $0^\circ\text{C}$  for 30 min. The reaction



mixture was concentrated to dryness and the residue was purified by column chromatography on silica gel (dichloromethane/methanol = 100:1 to 20:1 as the eluent) to afford **5** (16 mg, 82% yield) as a white solid.

White solid, m.p. = 138-139°C; 16 mg, 82% yield; 2:98 er;  $[\alpha]_{\text{D}}^{20.0} = +76.1$  (0.1, methanol); [Daicel CHIRALPAK® IA-3 (4.6 mm x 250mm), *n*-hexane/2-propanol = 80/20,  $v = 1.0 \text{ mL} \cdot \text{min}^{-1}$ ,  $\lambda = 210 \text{ nm}$ ,  $t$  (major) = 12.7 min,  $t$  (minor) = 11.4 min];  $^1\text{H}$  NMR (400 MHz,  $\text{CD}_3\text{OD}$ )  $\delta$  2.07 – 2.25 (m, 2H), 2.32 (s, 3H), 2.33 (s, 3H), 2.40 – 2.50 (m, 1H), 3.57 (d,  $J = 6.7 \text{ Hz}$ , 2H), 4.34 (dd,  $J = 8.9, 5.6 \text{ Hz}$ , 1H), 4.60 (s, 2H), 6.97 (d,  $J = 5.4 \text{ Hz}$ , 2H), 7.07 – 7.17 (m, 4H), 7.28 (d,  $J = 8.2 \text{ Hz}$ , 1H);  $^{13}\text{C}$  NMR (100 MHz,  $\text{CD}_3\text{OD}$ )  $\delta$  18.9, 21.2, 42.1, 46.0, 63.2, 68.1, 73.2, 126.7, 127.7, 129.1, 129.9, 131.0, 137.3, 138.3, 138.5, 142.4, 143.1; HRMS (ESI- quadrupole)  $m/z$  calcd. for  $\text{C}_{19}\text{H}_{24}\text{O}_3\text{Na}$   $[\text{M}+\text{Na}]^+$ : 323.1618, found: 323.1619.

**(2-methyl-4-((3*S*,5*R*)-5-(*p*-tolyl)tetrahydrofuran-3-yl)phenyl)methanol (**6**)**<sup>6</sup>

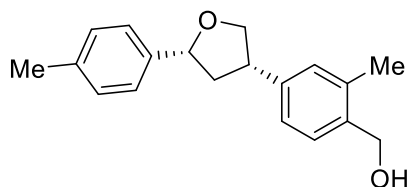

To a solution of **5** (16 mg, 0.05 mmol) in anhydrous 1,2-dichloroethane (2 mL) was added *p*-toluenesulfonic acid monohydrate (1.0 mg, 0.005 mmol, 0.1 eq.). The reaction was allowed to stirred at 40°C for 12 h before quenched by brine (10 mL). The organic layer was separated and the aqueous layer was extracted with DCM (10 mL×2). The combined organic layer was washed by brine, dried over anhydrous  $\text{Na}_2\text{SO}_4$ . The organic layer was concentrated and the crude product was purified by column chromatography on silica gel (petroleum ether / ethyl acetate = 5:1 as the eluent) to afford product **6** (12 mg, dr 4:1, totally 80% yield) as amorphous foam.

Amorphous foam; 12 mg, 80% yield; 2:98 er (*major isomer*);  $[\alpha]_{\text{D}}^{20.0} = +27.2$  (0.1,  $\text{CH}_2\text{Cl}_2$ ); [Daicel CHIRALPAK® IA-3 (4.6 mm x 250mm), *n*-hexane/2-propanol = 90/10,  $v = 1.0 \text{ mL} \cdot \text{min}^{-1}$ ,  $\lambda = 210 \text{ nm}$ ,  $t$  (major) = 16.9 min,  $t$  (minor) = 15.1 min]; *major isomer*:  $^1\text{H}$  NMR (400 MHz,  $\text{CDCl}_3$ )  $\delta$  1.66 (s, 1H), 1.95 – 2.03 (m, 1H), 2.34 (s, 3H), 2.35 (s, 3H), 2.67 – 2.74 (m, 1H), 3.54 – 3.65 (m, 1H), 3.98 (t,  $J = 8.4 \text{ Hz}$ , 1H), 4.32 (t,

$J = 8.2$  Hz, 1H), 4.66 (s, 2H), 5.03 (dd,  $J = 5.7, 10.1$  Hz, 1H), 7.07 – 7.12 (m, 2H), 7.17 (d,  $J = 7.8$  Hz, 2H), 7.24 – 7.28 (m, 1H), 7.30 (d,  $J = 7.1$  Hz, 2H); *minor isomer*:  $^1\text{H}$  NMR (400 MHz,  $\text{CDCl}_3$ )  $\delta$  1.63 (s, 1H), 2.25 – 2.30 (m, 1H), 2.34 (s, 3H), 2.35 (s, 3H), 2.40 – 2.48 (m, 1H), 3.46 – 3.52 (m, 1H), 3.91 (t,  $J = 8.2$  Hz, 1H), 4.43 (t,  $J = 7.9$  Hz, 1H), 4.66 (s, 2H), 5.19 (t, 1H), 7.10 (dd,  $J = 13.2, 5.5$  Hz, 2H), 7.17 (d,  $J = 7.8$  Hz, 2H), 7.28 – 7.24 (m, 1H), 7.30 (d,  $J = 7.1$  Hz, 2H);  $^{13}\text{C}$  NMR (100 MHz,  $\text{CDCl}_3$ )  $\delta$  18.7, 18.8, 21.1, 21.2, 42.8, 43.7, 44.2, 45.8, 63.3, 63.4, 75.1, 80.6, 81.8, 124.9, 125.0, 125.6, 125.8, 128.1, 129.1, 129.2, 129.4, 129.5, 130.0, 136.6, 137.1, 137.2, 138.5, 139.6, 140.6, 141.4; HRMS (ESI- quadrupole)  $m/z$  calcd. for  $\text{C}_{20}\text{H}_{19}\text{BrNO}_3$   $[\text{M}+\text{H}]^+$ : 283.1693, found: 283.1689.

### Synthesis of indomethacin ester (9)

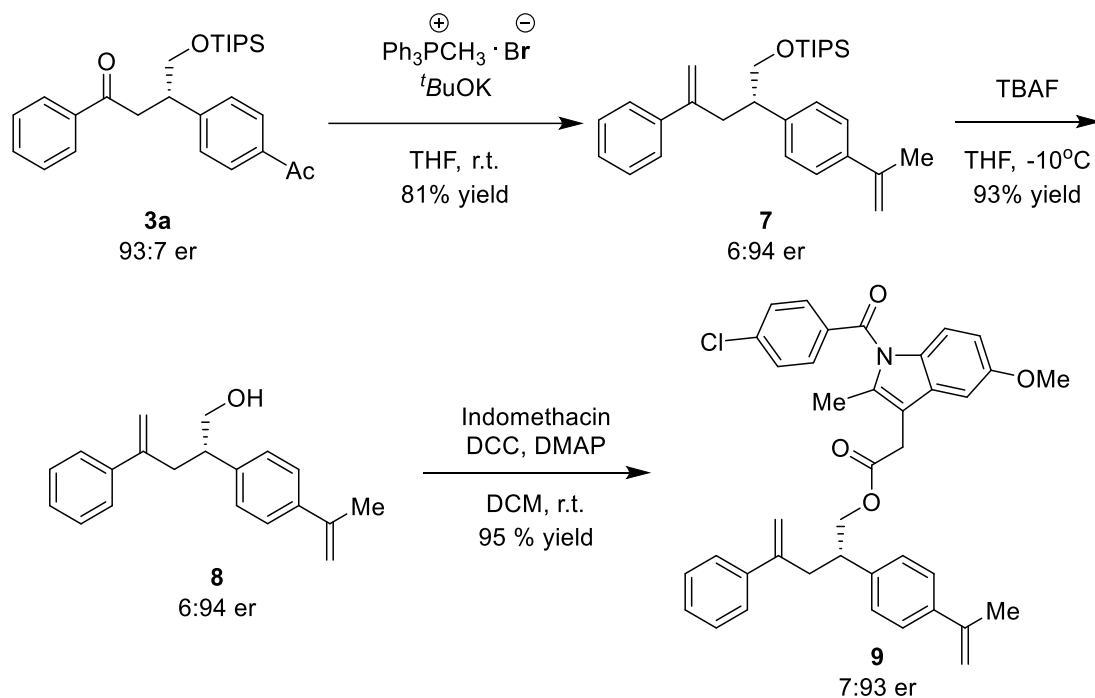

### (*S*)-triisopropyl((4-phenyl-2-(4-(prop-1-en-2-yl)phenyl)pent-4-en-1-yl)oxy)silane (7)

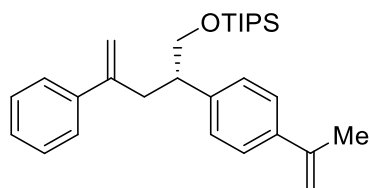

To a suspension of methyltriphenylphosphonium bromide (200.0 mg, 0.56 mmol) in anhydrous THF (2 mL) was added *t*-BuOK (63 mg, 0.56 mmol) at 0°C with nitrogen

protection, then the reaction was stirred at ambient temperature for 2 h to form a bright yellow suspension. The witting reagent was cooled to 0°C, then a solution of compound **3a** (80 mg, 0.18 mmol) in anhydrous THF (1 mL) was added *via* syringe at 0°C. After the addition, the reaction was allowed to stirred at room temperature for 2 h. The reaction was quenched by water (5 mL) and extracted with EA (10 mL×2). The combined organic layer was washed with brine, dried over anhydrous Na<sub>2</sub>SO<sub>4</sub>. The organic layer was concentrated to dryness and the residue was purified by column chromatography on silica gel (petroleum ether/ethyl acetate = 4:1 as the eluent) to afford product **7** as colorless oil.

Colorless oil; 64 mg, 81% yield; 6:94 er;  $[\alpha]_D^{20.0} = +57.1$  (0.1, CH<sub>2</sub>Cl<sub>2</sub>); [Daicel CHIRALPAK® IA-3 (4.6 mm x 250mm), *n*-hexane,  $v = 0.1 \text{ mL} \cdot \text{min}^{-1}$ ,  $\lambda = 254 \text{ nm}$ ,  $t$  (major) = 36.7 min,  $t$  (minor) = 35.3 min]; <sup>1</sup>H NMR (400 MHz, CDCl<sub>3</sub>)  $\delta$  0.98 – 1.07 (m, 21H), 2.13 (s, 3H), 2.68 (dd,  $J = 9.1, 14.2 \text{ Hz}$ , 1H), 2.88 (dt,  $J = 5.7, 12.8, \text{ Hz}$ , 1H), 3.33 (dd,  $J = 5.4, 14.2, \text{ Hz}$ , 1H), 3.71 – 3.87 (m, 2H), 4.89 (s, 1H), 5.03 (s, 1H), 5.18 (s, 1H), 5.34 (s, 1H), 7.06 (d,  $J = 8.1 \text{ Hz}$ , 2H), 7.25 (d,  $J = 4.0 \text{ Hz}$ , 1H), 7.27 (d,  $J = 5.6 \text{ Hz}$ , 1H), 7.33 (d,  $J = 9.0 \text{ Hz}$ , 2H), 7.37 (d,  $J = 4.0 \text{ Hz}$ , 2H), 7.39 (s, 1H); <sup>13</sup>C NMR (100 MHz, CDCl<sub>3</sub>)  $\delta$  12.1, 18.1, 21.9, 37.9, 46.7, 67.5, 111.7, 114.3, 125.2, 126.5, 127.4, 128.1, 128.3, 139.1, 141.0, 142.0, 143.2, 146.6; HRMS (ESI- quadrupole)  $m/z$  calcd. for C<sub>29</sub>H<sub>43</sub>OSi [M+H]<sup>+</sup>: 435.3078, found: 435.3074.

**(S)-4-phenyl-2-(4-(prop-1-en-2-yl)phenyl)pent-4-en-1-ol (8)**

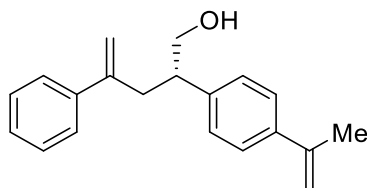

To a solution of compound **7** (62.0 mg, 0.143 mmol) in anhydrous THF (2 mL) was added TBAF (210  $\mu\text{L}$ , 0.21 mmol, 1.5 eq., 1M in THF) at -10°C, then stirred the reaction at 0°C for 2 h. The reaction mixture was concentrated and the residue was purified by chromatography on silica gel (petroleum ether/ethyl acetate = 50:1 to 10:1 as the eluent) to afford **8** (37 mg, 93% yield) as colorless oil.

Colorless oil; 37 mg, 93% yield; 6:94 er;  $[\alpha]_{\text{D}}^{20.0} = +70.4$  (0.1,  $\text{CH}_2\text{Cl}_2$ ); [Daicel CHIRALPAK® IA-3 (4.6 mm x 250mm), *n*-hexane/2-propanol = 90/10,  $v = 1.0 \text{ mL} \cdot \text{min}^{-1}$ ,  $\lambda = 254 \text{ nm}$ ,  $t$  (major) = 7.8 min,  $t$  (minor) = 6.3 min];  $^1\text{H NMR}$  (400 MHz,  $\text{CDCl}_3$ )  $\delta$  1.32 (s, 1H), 2.16 (s, 3H), 2.82 (dd,  $J = 12.4, 5.7 \text{ Hz}$ , 1H), 2.88 – 3.08 (m, 2H), 3.73 – 3.81 (m, 2H), 5.01 (s, 1H), 5.08 (s, 1H), 5.24 (s, 1H), 5.38 (s, 1H), 7.14 (d,  $J = 8.0 \text{ Hz}$ , 2H), 7.27 – 7.41 (m, 5H), 7.43 (d,  $J = 7.9 \text{ Hz}$ , 2H);  $^{13}\text{C NMR}$  (100 MHz,  $\text{CDCl}_3$ )  $\delta$  21.8, 38.4, 46.1, 66.7, 112.1, 114.6, 125.7, 126.4, 127.6, 127.9, 128.5, 139.7, 140.8, 141.3, 142.9, 146.3; HRMS (ESI- quadrupole)  $m/z$  calcd. for  $\text{C}_{20}\text{H}_{23}\text{O}$   $[\text{M}+\text{H}]^+$ : 279.1743, found: 279.1741.

**Indomethacin (*S*)-4-phenyl-2-(4-(prop-1-en-2-yl)phenyl)pent-4-en-1-yl ester (9)**

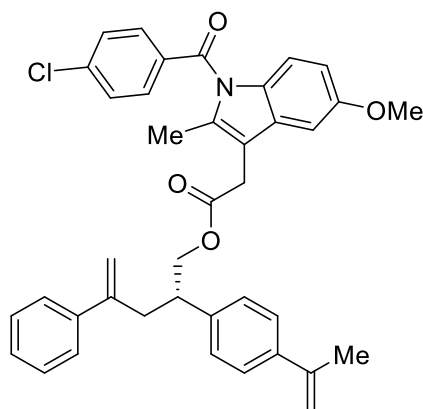

To a mixture of compound **8** (18 mg, 0.065 mmol) and indomethacin (27.8 mg, 0.078 mmol) in anhydrous DCM (2 mL) was added DMAP (1.6 mg, 0.013 mmol) and DCC (18.7 mg, 0.09 mmol) at 0°C with nitrogen protection, then the reaction was stirred at ambient temperature for 4 h. The reaction mixture was concentrated and the crude product was purified by column chromatography on silica gel (petroleum ether/ethyl acetate = 5:1 as the eluent) to afford **9** (38 mg, 95% yield) as thick yellow oil.

Yellow oil; 38 mg, 95% yield; 7:93 er;  $[\alpha]_{\text{D}}^{20.0} = +22.3$  (0.1,  $\text{CH}_2\text{Cl}_2$ ); [Daicel CHIRALPAK® IA-3 (4.6 mm x 250mm), *n*-hexane/2-propanol = 60/40,  $v = 1.0 \text{ mL} \cdot \text{min}^{-1}$ ,  $\lambda = 254 \text{ nm}$ ,  $t$  (major) = 6.9 min,  $t$  (minor) = 5.5 min];  $^1\text{H NMR}$  (400 MHz,  $\text{CDCl}_3$ )  $\delta$  2.09 (s, 3H), 2.26 (s, 3H), 2.73 (dd,  $J = 7.7, 14.2 \text{ Hz}$ , 1H), 2.84 (dd,  $J = 7.2, 14.2 \text{ Hz}$ , 1H), 2.96 – 3.03 (m, 1H), 3.59 (s, 2H), 3.77 (s, 3H), 4.17 – 4.31 (m, 2H), 4.86 (s, 1H), 5.03 (s, 1H), 5.17 (s, 1H), 5.32 (s, 1H), 6.67 (dd,  $J = 2.3, 9.0 \text{ Hz}$ , 1H), 6.86 – 6.91 (m, 2H), 6.93 (d,  $J = 8.1 \text{ Hz}$ , 2H), 7.23 – 7.29 (m, 7H), 7.42 (d,  $J = 8.4 \text{ Hz}$ , 2H),

7.59 (d,  $J = 8.4$  Hz, 2H);  $^{13}\text{C}$  NMR (100 MHz,  $\text{CDCl}_3$ )  $\delta$  13.3, 21.7, 30.4, 38.4, 42.4, 55.7, 67.8, 101.3, 111.8, 112.1, 112.6, 115.0, 115.1, 125.4, 126.3, 127.6, 127.7, 128.4, 129.1, 130.7, 130.8, 131.2, 133.9, 135.8, 139.2, 139.4, 140.5, 140.6, 142.7, 145.6, 156.1, 168.2, 170.6; HRMS (ESI- quadrupole)  $m/z$  calcd. for  $\text{C}_{39}\text{H}_{37}\text{ClNO}_4$   $[\text{M}+\text{H}]^+$ : 618.2406, found: 618.2408.

**Synthesis of (2*R*,4*S*)-2-methyl-2-phenyl-4-(4-(prop-1-en-2-yl)phenyl)tetrahydrofuran (10)** <sup>7</sup>

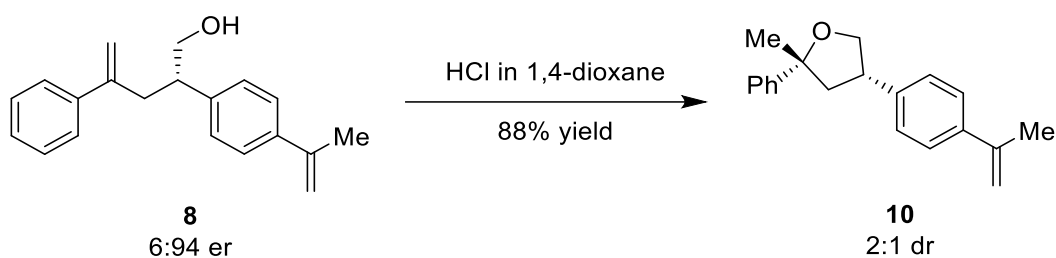

To a solution of compound **8** (16 mg, 0.065 mmol) in anhydrous chloroform (2 mL) was added HCl solution (57  $\mu\text{L}$ , 0.057 mmol, 1.0 eq., 1M in 1,4-dioxane) at 0°C with nitrogen protection. The reaction was stirred for 30 min at room temperature. The reaction mixture was concentrated and the crude product was purified by column chromatography on silica gel (petroleum ether/ethyl acetate = 80:1 as the eluent) to afford **10** (14 mg, dr 2:1, totally 88% yield) as yellow viscous oil.

Yellow viscous oil; 14 mg, 88% yield;  $[\alpha]_{\text{D}}^{20.0} = +10.8$  (0.1,  $\text{CH}_2\text{Cl}_2$ ); *major isomer*:  $^1\text{H}$  NMR (400 MHz,  $\text{CDCl}_3$ )  $\delta$  1.60 (s, 3H), 2.11 (s, 3H), 2.30 (dd,  $J = 12.2, 10.8$  Hz, 1H), 2.63 (dd,  $J = 8.0, 12.4$  Hz, 1H), 3.60 – 3.74 (m, 1H), 3.81 (m, 1H), 4.38 (t,  $J = 7.9$  Hz, 1H), 5.04 (s, 1H), 5.31 (s, 1H), 7.11 (d,  $J = 8.2$  Hz, 1H), 7.22 – 7.30 (m, 2H), 7.33 – 7.38 (m, 4H), 7.46 (d,  $J = 7.7$  Hz, 2H); *minor isomer*:  $^1\text{H}$  NMR (400 MHz,  $\text{CDCl}_3$ )  $\delta$  1.65 (s, 3H), 2.13 (s, 3H), 2.18 – 2.20 (m, 1H), 2.71 (dd,  $J = 12.1, 7.1$  Hz, 1H), 3.34 – 3.22 (m, 1H), 3.96 (t,  $J = 8.6$  Hz, 1H), 4.32 (t,  $J = 8.4$  Hz, 1H), 5.05 (s, 1H), 5.34 (s, 1H), 7.11 (d,  $J = 8.2$  Hz, 1H), 7.19 (d,  $J = 8.2$  Hz, 2H), 7.31 – 7.22 (m, 1H), 7.43 – 7.38 (m, 3H), 7.46 (d,  $J = 7.7$  Hz, 2H);  $^{13}\text{C}$  NMR (101 MHz,  $\text{CDCl}_3$ )  $\delta$  21.8, 21.9, 30.3, 30.7, 44.4, 45.6, 48.1, 48.4, 74.0, 74.5, 85.1, 85.6, 112.2, 124.6, 124.8, 125.7, 125.8, 126.6, 126.7, 127.2, 127.4, 128.3, 128.4, 139.6, 139.7, 140.1, 140.9, 142.9, 145.0, 147.7, 149.0; HRMS (ESI- quadrupole)  $m/z$  calcd. for  $\text{C}_{20}\text{H}_{22}\text{O}$   $[\text{M}+\text{H}]^+$ : 279.1743, found: 279.1739.

## Mechanistic studies

### (A). Effect of cyclopropanol isomers

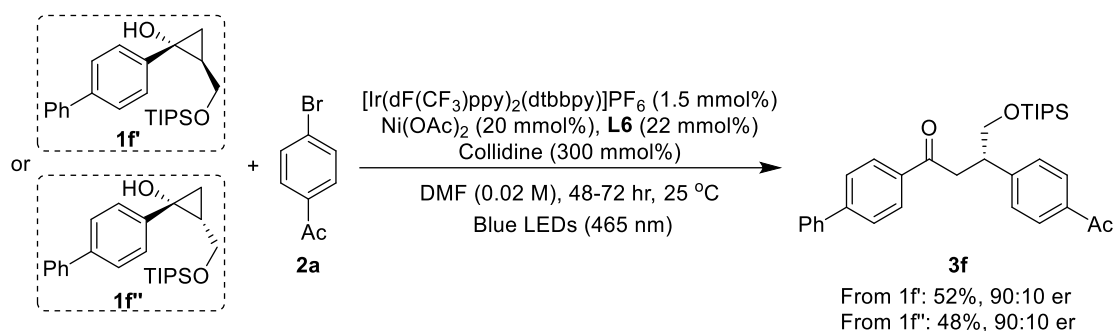

Two experiments were carried out to evaluate the effect of the cyclopropanol isomers.

When used *trans*-isomer **1f'** as the starting material, followed the standard reaction conditions, product **3f** was obtained in 52% yield with 90:10 er. [Daicel CHIRALPAK® IA-3 (4.6 mm x 250mm), *n*-hexane/2-propanol = 70/30,  $v = 1.0 \text{ mL} \cdot \text{min}^{-1}$ ,  $\lambda = 254 \text{ nm}$ ,  $t$  (major) = 8.2 min,  $t$  (minor) = 13.8 min];

When used *cis*-isomer **1f''** as the starting material, followed the standard reaction conditions, product **3f** was obtained in 48% yield with 90:10 er. [Daicel CHIRALPAK® IA-3 (4.6 mm x 250mm), *n*-hexane/2-propanol = 70/30,  $v = 1.0 \text{ mL} \cdot \text{min}^{-1}$ ,  $\lambda = 254 \text{ nm}$ ,  $t$  (major) = 8.0 min,  $t$  (minor) = 12.9 min];

The results showed that both cyclopropanol isomers could provide the product in similar yields with the same enantioselectivity.

### (B). Effect of cyclopropanol OH

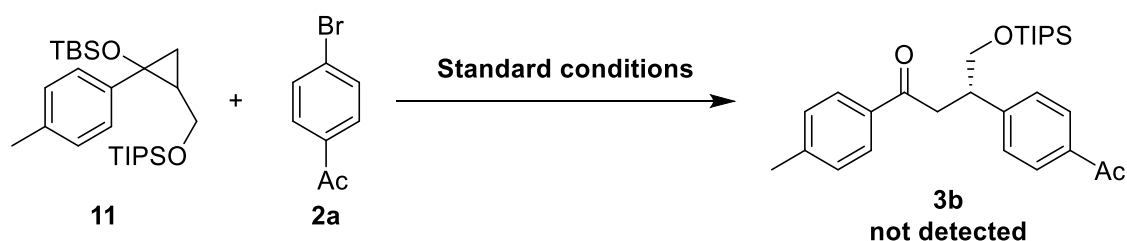

To a 10 mL vial equipped with a stir bar was added  $[\text{Ir}(\text{dFCF}_3\text{ppy})_2\text{dtbbpy}]\text{PF}_6$  (1.7 mg, 1.5  $\mu\text{mol}$ , 1.5 mmol%), Nickel(II) acetate (3.6 mg, 20  $\mu\text{mol}$ , 20 mmol%), **L6** (6.6 mg, 22  $\mu\text{mol}$ , 22 mmol%) and **2a** (20 mg, 0.1 mmol). The vial was sealed, evacuated and backfilled with nitrogen three times, then anhydrous DMF (5mL) was injected under nitrogen protection. The reaction was stirred at room temperature for 10 min. TBS-

protected cyclopropanol **1b** (135 mg, 0.3 mmol) and collidine (36.5 mg, 0.3 mmol) was injected *via* micro syringe respectively. After degassing the reaction mixture with Freeze-Pump-Thaw methods for three cycles, it was stirred and irradiated with the corresponding blue LEDs photoreactor at 25°C (cooled by ethanol circulator bath) for 48 h. No product **3b** was observed from <sup>1</sup>H-NMR of the crude reaction mixture.

### (C) Trapping of the radical intermediate by TEMPO

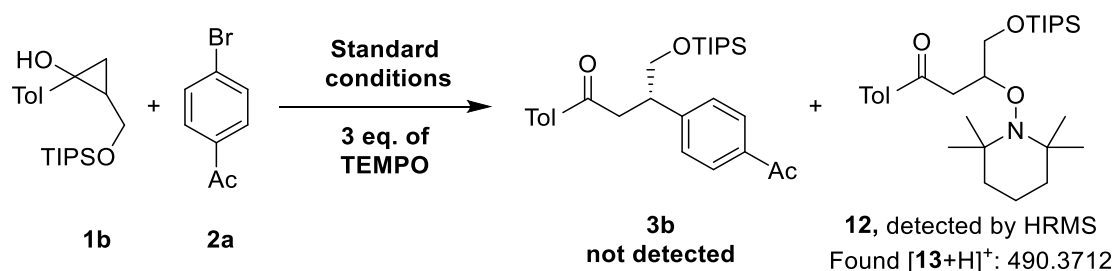

To a 10 mL vial equipped with a stir bar was added [Ir(dFCF<sub>3</sub>ppy)<sub>2</sub>dtbbpy]PF<sub>6</sub> (1.7 mg, 1.5 μmol, 1.5 mmol%), Nickel(II) acetate (3.6 mg, 20 μmol, 20 mmol%), **L6** (6.6 mg, 22 μmol, 22 mmol%) and **2a** (20 mg, 0.1 mmol). The vial was sealed, evacuated and backfilled with nitrogen three times, then anhydrous DMF (5 mL) was injected under nitrogen protection, stirred at room temperature for 10 min. Cyclopropanol **1b** (100 mg, 0.3 mmol) and collidine (36.5 mg, 0.3 mmol) was injected *via* micro syringe respectively. Then TEMPO (47 mg, 0.3 mmol, 3 equiv.) in anhydrous DMF (1 mL) was injected slowly at -10°C. After degassing the reaction mixture with Freeze-Pump-Thaw methods for three cycles, it was stirred and irradiated with the corresponding blue LEDs photoreactor at 25°C (cooled by ethanol circulator bath) for 48 h. The reaction mixture was poured into ice-water (50 mL), then extracted with DCM (10 mL×2), combined of the organic layer was washed with brine, dried over anhydrous Na<sub>2</sub>SO<sub>4</sub> and concentrated under reduced pressure to give yellow thick oil. The yellow thick oil was analyzed by HRMS.

HRMS (ESI- quadrupole) *m/z* calcd. for C<sub>29</sub>H<sub>52</sub>NO<sub>3</sub>Si [M+H]<sup>+</sup>: 490.3711, found: 490.3712.

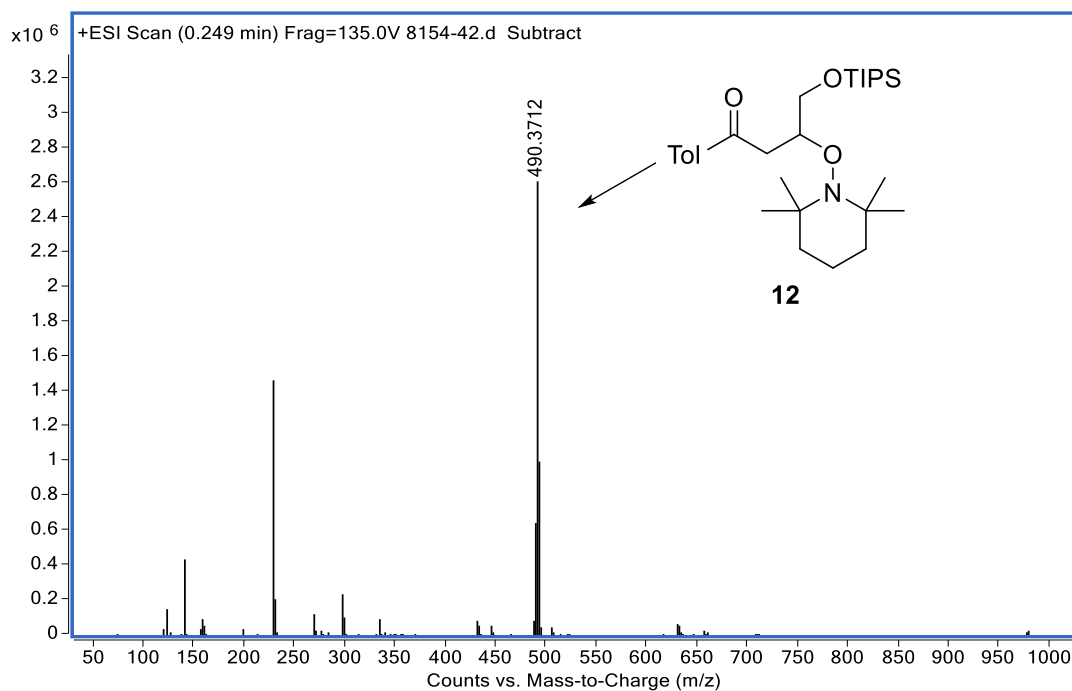

#### (D) Trapping of the radical intermediate with acrylonitrile

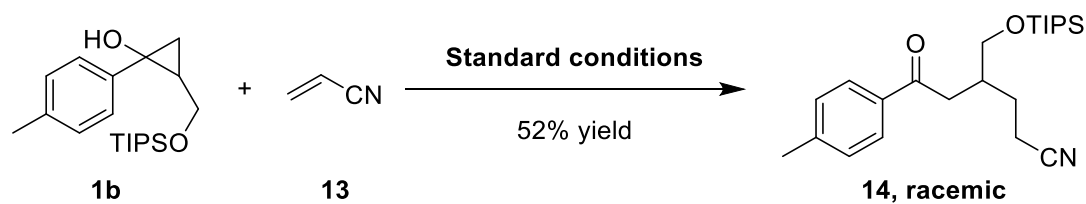

To a 10 mL vial equipped with a stir bar was added [Ir(dFCF<sub>3</sub>ppy)<sub>2</sub>dtbbpy]PF<sub>6</sub> (1.7 mg, 1.5 μmol, 1.5 mmol%), Nickel(II) acetate (3.6 mg, 20 μmol, 20 mmol%) and **L6** (6.6 mg, 22 μmol, 22 mmol%). The vial was sealed, evacuated and backfilled with nitrogen three times, then anhydrous DMF (5mL) was injected under nitrogen protection, stirred at room temperature for 10 min. Cyclopropanol **1b** (100 mg, 0.3 mmol) and collidine (36.5 mg, 0.3 mmol) was injected *via* micro syringe respectively. After degassing the reaction mixture with Freeze-Pump-Thaw methods for three cycles, compound **13** (5.3 mg, 0.1 mmol) was injected *via* micro syringe. The reaction was stirred and irradiated with the corresponding blue LEDs photoreactor at 25°C (cooled by ethanol circulator bath) for 48 h. The reaction mixture was concentrated under reduced pressure and the residue was purified by column chromatography on silica gel (petroleum ether/ethyl acetate = 100:1 to 20:1 as the eluent) to give product **14** (20.0 mg, 52% yield) as yellow



oil.

$^1\text{H}$  NMR (400 MHz,  $\text{CDCl}_3$ )  $\delta$  1.03 – 1.10 (m, 21H), 1.76 – 1.81 (m, 1H), 1.86 – 1.92 (m, 1H), 2.32 – 2.36 (m, 1H), 2.42 (s, 3H), 2.45 – 2.49 (m, 2H), 2.84 (dd,  $J = 17.0, 6.6$  Hz, 1H), 3.20 (dd,  $J = 17.0, 6.3$  Hz, 1H), 3.73 (d,  $J = 4.6$  Hz, 2H), 7.26 (d,  $J = 7.8$  Hz, 2H), 7.86 (d,  $J = 7.8$  Hz, 2H);  $^{13}\text{C}$  NMR (100 MHz,  $\text{CDCl}_3$ )  $\delta$  12.0, 15.4, 18.1, 21.7, 27.7, 36.4, 39.8, 65.1, 119.9, 128.2, 129.4, 134.6, 144.1, 198.7.

HRMS (ESI- quadrupole)  $m/z$  calcd. for  $\text{C}_{23}\text{H}_{38}\text{NO}_2\text{Si}$   $[\text{M}+\text{H}]^+$ : 388.2666, found: 388.2665.

## X-ray Crystallography data

### X-ray structure of compound 6

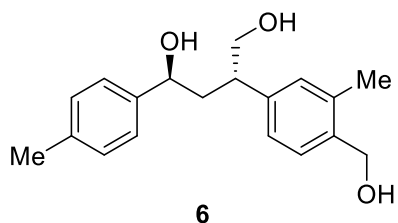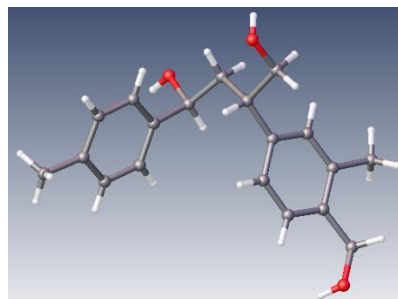

CDCC: 2126211

Table S7 Crystal data and structure refinement for Compound 6.

|                                    |                                                |
|------------------------------------|------------------------------------------------|
| Identification code                | Compound 6                                     |
| Empirical formula                  | C <sub>19</sub> H <sub>24</sub> O <sub>3</sub> |
| Formula weight                     | 300.38                                         |
| Temperature/K                      | 293.00(2)                                      |
| Crystal system                     | orthorhombic                                   |
| Space group                        | P2 <sub>1</sub> 2 <sub>1</sub> 2 <sub>1</sub>  |
| a/Å                                | 9.16551(16)                                    |
| b/Å                                | 10.4822(2)                                     |
| c/Å                                | 17.5734(4)                                     |
| α/°                                | 90                                             |
| β/°                                | 90                                             |
| γ/°                                | 90                                             |
| Volume/Å <sup>3</sup>              | 1688.36(6)                                     |
| Z                                  | 4                                              |
| ρ <sub>calc</sub> /cm <sup>3</sup> | 1.182                                          |
| μ/mm <sup>-1</sup>                 | 0.624                                          |
| F(000)                             | 648.0                                          |
| Crystal size/mm <sup>3</sup>       | 0.06 × 0.05 × 0.04                             |
| Radiation                          | Cu Kα (λ = 1.54184)                            |

|                                                  |                                                               |
|--------------------------------------------------|---------------------------------------------------------------|
| 2 $\Theta$ range for data collection/ $^{\circ}$ | 9.826 to 134.15                                               |
| Index ranges                                     | $-4 \leq h \leq 10, -12 \leq k \leq 12, -19 \leq l \leq 20$   |
| Reflections collected                            | 8109                                                          |
| Independent reflections                          | 2989 [ $R_{\text{int}} = 0.0365, R_{\text{sigma}} = 0.0407$ ] |
| Data/restraints/parameters                       | 2989/0/204                                                    |
| Goodness-of-fit on $F^2$                         | 1.098                                                         |
| Final R indexes [ $I \geq 2\sigma(I)$ ]          | $R_1 = 0.0396, wR_2 = 0.1004$                                 |
| Final R indexes [all data]                       | $R_1 = 0.0422, wR_2 = 0.1025$                                 |
| Largest diff. peak/hole / $e \text{ \AA}^{-3}$   | 0.16/-0.23                                                    |
| Flack parameter                                  | -0.04(11)                                                     |

**Table S8 Fractional Atomic Coordinates ( $\times 10^4$ ) and Equivalent Isotropic Displacement Parameters ( $\text{\AA}^2 \times 10^3$ ) for Compound 6.  $U_{\text{eq}}$  is defined as 1/3 of of the trace of the orthogonalised  $U_{\text{ij}}$  tensor.**

| Atom | x          | y           | z          | $U_{\text{eq}}$ |
|------|------------|-------------|------------|-----------------|
| O1   | 7452.7(16) | 3709.5(16)  | 5073.1(11) | 52.6(4)         |
| O2   | 2001.7(16) | 3624.5(15)  | 4373.7(11) | 48.0(4)         |
| O3   | 4159.3(16) | 11061.1(15) | 6187.8(10) | 48.0(4)         |
| C1   | 4904.8(19) | 6436.7(19)  | 5437.0(12) | 33.9(4)         |
| C2   | 5442(2)    | 5231.6(19)  | 5055.5(12) | 35.6(4)         |
| C3   | 4378(2)    | 6428(2)     | 6183.5(13) | 41.3(5)         |
| C4   | 4575(2)    | 8719(2)     | 5430.2(12) | 37.4(4)         |
| C5   | 6705(2)    | 4651(2)     | 5504.5(14) | 42.9(5)         |
| C6   | 4090.9(19) | 8711(2)     | 6177.7(12) | 36.7(4)         |
| C7   | 4986(2)    | 7601(2)     | 5067.5(12) | 37.0(4)         |
| C8   | 3093(3)    | 6445(3)     | 2526.2(16) | 53.9(6)         |
| C9   | 3009(2)    | 4684.7(19)  | 4413.9(13) | 36.6(4)         |
| C10  | 3446(2)    | 5083(2)     | 3618.7(12) | 37.8(4)         |
| C11  | 4242(2)    | 4232.4(19)  | 4922.7(13) | 36.7(4)         |
| C12  | 2821(2)    | 6149(2)     | 3280.7(15) | 46.1(5)         |

|     |         |         |            |         |
|-----|---------|---------|------------|---------|
| C13 | 4011(3) | 5709(3) | 2085.3(14) | 50.5(6) |
| C14 | 3977(2) | 7545(2) | 6560.5(13) | 42.0(5) |
| C15 | 4406(3) | 4365(3) | 3181.9(15) | 52.9(6) |
| C16 | 3735(3) | 9945(2) | 6587.8(14) | 47.4(5) |
| C17 | 4681(3) | 4677(3) | 2431.7(16) | 58.3(6) |
| C18 | 4250(4) | 5984(4) | 1253.7(17) | 72.9(9) |
| C19 | 3493(4) | 7491(3) | 7382.6(17) | 67.7(8) |

**Table S9 Anisotropic Displacement Parameters ( $\text{\AA}^2 \times 10^3$ ) for Compound 6. The Anisotropic displacement factor exponent takes the form: -**

$$2\pi^2[h^2a^*U_{11}+2hka^*b^*U_{12}+\dots].$$

| Atom | U <sub>11</sub> | U <sub>22</sub> | U <sub>33</sub> | U <sub>23</sub> | U <sub>13</sub> | U <sub>12</sub> |
|------|-----------------|-----------------|-----------------|-----------------|-----------------|-----------------|
| O1   | 49.0(8)         | 35.8(8)         | 72.9(12)        | 8.1(9)          | 18.0(8)         | 8.3(6)          |
| O2   | 45.3(7)         | 39.6(8)         | 58.9(10)        | 9.2(8)          | -11.7(7)        | -8.5(7)         |
| O3   | 53.1(8)         | 35.1(8)         | 55.9(10)        | -5.7(7)         | -4.7(7)         | 1.5(6)          |
| C1   | 33.3(9)         | 31.1(9)         | 37.4(10)        | 0.8(9)          | -1.9(7)         | -0.9(7)         |
| C2   | 37.5(9)         | 31.3(9)         | 38.0(10)        | 0.7(9)          | 1.9(8)          | -0.2(7)         |
| C3   | 46.6(10)        | 34.8(11)        | 42.7(12)        | 6.6(9)          | 4.0(8)          | -2.3(8)         |
| C4   | 43.3(9)         | 30.1(9)         | 38.7(10)        | 3.7(9)          | -2.5(8)         | 0.6(8)          |
| C5   | 39.0(10)        | 38.1(11)        | 51.6(12)        | 1.7(10)         | -0.7(9)         | 4.6(8)          |
| C6   | 33.1(8)         | 35.8(10)        | 41.3(11)        | -2.9(9)         | -0.9(7)         | 0.1(7)          |
| C7   | 43.6(9)         | 35.8(10)        | 31.7(10)        | 2.1(9)          | 0.9(8)          | -0.3(8)         |
| C8   | 57.8(13)        | 52.0(14)        | 52.0(14)        | 14.6(12)        | 1.4(11)         | 3.4(11)         |
| C9   | 38.9(9)         | 30.2(9)         | 40.6(11)        | -1.2(9)         | 0.3(8)          | -1.2(7)         |
| C10  | 36.3(9)         | 38.8(10)        | 38.5(10)        | -1.3(9)         | -3.0(8)         | 0.4(8)          |
| C11  | 42.4(10)        | 30.5(9)         | 37.3(11)        | 1.7(8)          | -1.4(8)         | -1.0(8)         |
| C12  | 46.1(11)        | 41.6(11)        | 50.6(13)        | 6.8(11)         | 8.5(9)          | 7.8(10)         |
| C13  | 49.6(11)        | 60.0(14)        | 41.9(13)        | 0.3(11)         | 0.7(10)         | -11.5(10)       |
| C14  | 43.4(10)        | 42.1(11)        | 40.6(12)        | 1.1(9)          | 7.3(8)          | -2.0(9)         |

|     |          |          |          |          |          |           |
|-----|----------|----------|----------|----------|----------|-----------|
| C15 | 60.7(13) | 51.6(14) | 46.2(13) | -3.3(11) | -1.7(11) | 18.1(11)  |
| C16 | 53.9(12) | 40.9(12) | 47.4(13) | -5.6(10) | 4.4(10)  | 3.3(9)    |
| C17 | 61.8(14) | 67.1(16) | 46.1(13) | -7.9(13) | 7.4(11)  | 11.7(12)  |
| C18 | 86.6(19) | 87(2)    | 45.1(15) | 2.5(15)  | 8.1(13)  | -14.0(17) |
| C19 | 96(2)    | 56.6(16) | 50.5(15) | 2.3(14)  | 26.5(14) | 1.1(15)   |

**Table S10 Bond Lengths for Compound 6.**

| Atom | Atom | Length/Å | Atom | Atom | Length/Å |
|------|------|----------|------|------|----------|
| O1   | C5   | 1.421(3) | C6   | C16  | 1.516(3) |
| O2   | C9   | 1.447(2) | C8   | C12  | 1.384(4) |
| O3   | C16  | 1.419(3) | C8   | C13  | 1.379(4) |
| C1   | C2   | 1.513(3) | C9   | C10  | 1.512(3) |
| C1   | C3   | 1.398(3) | C9   | C11  | 1.517(3) |
| C1   | C7   | 1.385(3) | C10  | C12  | 1.389(3) |
| C2   | C5   | 1.527(3) | C10  | C15  | 1.389(3) |
| C2   | C11  | 1.537(3) | C13  | C17  | 1.385(4) |
| C3   | C14  | 1.395(3) | C13  | C18  | 1.506(4) |
| C4   | C6   | 1.387(3) | C14  | C19  | 1.512(4) |
| C4   | C7   | 1.386(3) | C15  | C17  | 1.382(4) |
| C6   | C14  | 1.399(3) |      |      |          |

**Table S11 Bond Angles for Compound 6.**

| Atom | Atom | Atom | Angle/°    | Atom | Atom | Atom | Angle/°    |
|------|------|------|------------|------|------|------|------------|
| C3   | C1   | C2   | 121.53(18) | C10  | C9   | C11  | 115.70(17) |
| C7   | C1   | C2   | 120.72(18) | C12  | C10  | C9   | 120.54(19) |
| C7   | C1   | C3   | 117.68(19) | C15  | C10  | C9   | 121.9(2)   |
| C1   | C2   | C5   | 110.51(17) | C15  | C10  | C12  | 117.4(2)   |
| C1   | C2   | C11  | 113.78(16) | C9   | C11  | C2   | 114.19(16) |
| C5   | C2   | C11  | 110.45(17) | C8   | C12  | C10  | 121.0(2)   |
| C14  | C3   | C1   | 122.1(2)   | C8   | C13  | C17  | 117.4(2)   |

|     |    |     |            |     |     |     |            |
|-----|----|-----|------------|-----|-----|-----|------------|
| C7  | C4 | C6  | 121.2(2)   | C8  | C13 | C18 | 121.8(3)   |
| O1  | C5 | C2  | 111.50(19) | C17 | C13 | C18 | 120.8(3)   |
| C4  | C6 | C14 | 119.0(2)   | C3  | C14 | C6  | 119.05(19) |
| C4  | C6 | C16 | 120.9(2)   | C3  | C14 | C19 | 120.0(2)   |
| C14 | C6 | C16 | 120.05(19) | C6  | C14 | C19 | 120.9(2)   |
| C1  | C7 | C4  | 121.01(18) | C17 | C15 | C10 | 121.0(2)   |
| C13 | C8 | C12 | 121.5(2)   | O3  | C16 | C6  | 114.12(18) |
| O2  | C9 | C10 | 109.62(18) | C15 | C17 | C13 | 121.5(2)   |
| O2  | C9 | C11 | 105.32(16) |     |     |     |            |

**Table S12 Torsion Angles for Compound 6.**

| <b>A</b> | <b>B</b> | <b>C</b> | <b>D</b> | <b>Angle/°</b> | <b>A</b> | <b>B</b> | <b>C</b> | <b>D</b> | <b>Angle/°</b> |
|----------|----------|----------|----------|----------------|----------|----------|----------|----------|----------------|
| O2       | C9       | C10      | C12      | 101.6(2)       | C7       | C4       | C6       | C14      | -1.9(3)        |
| O2       | C9       | C10      | C15      | -74.3(3)       | C7       | C4       | C6       | C16      | 176.07(19)     |
| O2       | C9       | C11      | C2       | -179.11(17)    | C8       | C13      | C17      | C15      | 2.2(4)         |
| C1       | C2       | C5       | O1       | -165.95(16)    | C9       | C10      | C12      | C8       | -173.0(2)      |
| C1       | C2       | C11      | C9       | 60.8(2)        | C9       | C10      | C15      | C17      | 173.7(2)       |
| C1       | C3       | C14      | C6       | 0.7(3)         | C10      | C9       | C11      | C2       | 59.7(2)        |
| C1       | C3       | C14      | C19      | -176.6(2)      | C10      | C15      | C17      | C13      | -0.3(4)        |
| C2       | C1       | C3       | C14      | 175.30(19)     | C11      | C2       | C5       | O1       | 67.2(2)        |
| C2       | C1       | C7       | C4       | -176.16(17)    | C11      | C9       | C10      | C12      | -139.5(2)      |
| C3       | C1       | C2       | C5       | -59.2(2)       | C11      | C9       | C10      | C15      | 44.6(3)        |
| C3       | C1       | C2       | C11      | 65.7(2)        | C12      | C8       | C13      | C17      | -1.5(4)        |
| C3       | C1       | C7       | C4       | 0.8(3)         | C12      | C8       | C13      | C18      | 176.7(3)       |
| C4       | C6       | C14      | C3       | 1.1(3)         | C12      | C10      | C15      | C17      | -2.4(4)        |
| C4       | C6       | C14      | C19      | 178.3(2)       | C13      | C8       | C12      | C10      | -1.2(4)        |
| C4       | C6       | C16      | O3       | -9.5(3)        | C14      | C6       | C16      | O3       | 168.48(19)     |
| C5       | C2       | C11      | C9       | -174.27(17)    | C15      | C10      | C12      | C8       | 3.1(3)         |
| C6       | C4       | C7       | C1       | 1.0(3)         | C16      | C6       | C14      | C3       | -176.9(2)      |

|              |           |                 |           |
|--------------|-----------|-----------------|-----------|
| C7 C1 C2 C5  | 117.7(2)  | C16 C6 C14 C19  | 0.3(3)    |
| C7 C1 C2 C11 | -117.4(2) | C18 C13 C17 C15 | -176.0(3) |
| C7 C1 C3 C14 | -1.6(3)   |                 |           |

**Table S13 Hydrogen Atom Coordinates ( $\text{\AA}\times 10^4$ ) and Isotropic Displacement Parameters ( $\text{\AA}^2\times 10^3$ ) for Compound 6.**

| Atom | x       | y        | z       | U(eq) |
|------|---------|----------|---------|-------|
| H1   | 7249.3  | 2999.2   | 5237.34 | 79    |
| H2   | 1258.38 | 3848.8   | 4151.13 | 72    |
| H3   | 3619.28 | 11164.83 | 5820.9  | 72    |
| H2A  | 5824.3  | 5474.77  | 4555.17 | 43    |
| H3A  | 4291.12 | 5652.2   | 6436.63 | 50    |
| H4   | 4625.86 | 9488.36  | 5167.69 | 45    |
| H5A  | 7382.8  | 5320.37  | 5647.07 | 51    |
| H5B  | 6330.94 | 4268.7   | 5967.79 | 51    |
| H7   | 5320.96 | 7633.94  | 4568.38 | 44    |
| H8   | 2645.96 | 7155.26  | 2311.62 | 65    |
| H9   | 2518.65 | 5403.96  | 4661.88 | 44    |
| H11A | 4679.37 | 3479.66  | 4696.73 | 44    |
| H11B | 3838.28 | 3985.4   | 5411.15 | 44    |
| H12  | 2211.01 | 6672.59  | 3565.77 | 55    |
| H15  | 4870.25 | 3664.15  | 3397.71 | 63    |
| H16A | 2691.56 | 9978.9   | 6678.05 | 57    |
| H16B | 4216.14 | 9940.12  | 7079.43 | 57    |
| H17  | 5331.79 | 4182.4   | 2152.72 | 70    |
| H18A | 3620.6  | 6667.89  | 1097.29 | 109   |
| H18B | 4033    | 5234.58  | 960.89  | 109   |
| H18C | 5248.08 | 6225.52  | 1172.57 | 109   |
| H19A | 3387.76 | 6616.85  | 7536.01 | 101   |

|      |         |         |         |     |
|------|---------|---------|---------|-----|
| H19B | 2574.88 | 7922.05 | 7436.24 | 101 |
| H19C | 4210.08 | 7899.96 | 7697.53 | 101 |

## Experimental

Single crystals of **6** (C<sub>19</sub>H<sub>24</sub>O<sub>3</sub>) were crystallized from tetrahydrofuran and *n*-hexane. A suitable crystal was selected and measured on a XtaLAB Synergy, Dualflex, HyPix diffractometer. The crystal was kept at 293.0(2) K during data collection. Using Olex2 [1], the structure was solved with the Unknown [2] structure solution program using Unknown and refined with the Unknown [3] refinement package using Unknown minimisation.

1. Dolomanov, O.V., Bourhis, L.J., Gildea, R.J, Howard, J.A.K. & Puschmann, H. *J. Appl. Cryst.* **2009**, *42*, 339-341.

## Crystal structure determination of Compound 6

**Crystal Data** for C<sub>19</sub>H<sub>24</sub>O<sub>3</sub> (*M* = 300.38 g/mol): orthorhombic, space group P2<sub>1</sub>2<sub>1</sub>2<sub>1</sub> (no. 19), *a* = 9.16551(16) Å, *b* = 10.4822(2) Å, *c* = 17.5734(4) Å, *V* = 1688.36(6) Å<sup>3</sup>, *Z* = 4, *T* = 293.00(2) K, μ(Cu Kα) = 0.624 mm<sup>-1</sup>, *D*<sub>calc</sub> = 1.182 g/cm<sup>3</sup>, 8109 reflections measured (9.826° ≤ 2Θ ≤ 134.15°), 2989 unique (*R*<sub>int</sub> = 0.0365, *R*<sub>sigma</sub> = 0.0407) which were used in all calculations. The final *R*<sub>1</sub> was 0.0396 (*I* > 2σ(*I*)) and *wR*<sub>2</sub> was 0.1025 (all data).



## References

1. Murray, P. R. D.; Cox, J. H.; Chiappini, N. D.; Roos, C. B.; McLoughlin, E. A.; Hejna B. G.; Nguyen, S. T.; Ripberger, H. H.; Ganley, J. M.; Tsui, E.; Shin, N. Y.; Koronkiewicz, B.; Qiu, G.; Knowles, R. R. Photochemical and Electrochemical Applications of Proton-Coupled Electron Transfer in Organic Synthesis. *Chem. Rev.* **2021**, doi: org/10.1021/acs.chemrev.1c00374.
2. (a) Rossolini, T.; Ferko, B.; and Dixon, D. J. Photocatalytic Reductive Formation of  $\alpha$ -Tertiary Ethers from Ketals. *Org. Lett.* **2019**, *21*, 6668–6673. (b) Takamura, M.; Yabu, K.; Nishi, T.; Yanagisawa, H.; Kanai, M.; Shibasaki, M. Efficient synthesis of a key intermediate of neurokinin receptor antagonists using a bifunctional asymmetric catalyst. *Synlett.* **2003**, *3*, 353–356.
3. Avullala, T.; Asgari, P.; Hua, Y.; Bokka, A.; Ridlen, S. G.; Yum, K.; Dias, H. V. R.; Jeon J. Umpolung  $\alpha$ -Silylation of Cyclopropyl Acetates via Low-Temperature Catalytic C–C Activation. *ACS Catal.* **2019**, *9*, 402–408.
4. Poh, J.-S.; Makai, S.; Keutz, von T.; Tran, D. N.; Battilocchio, C.; Pasau, P.; Ley, S. V. Rapid Asymmetric Synthesis of Disubstituted Allenes by Coupling of Flow-Generated Diazo Compounds and Propargylated Amines. *Angew. Chem., Int. Ed.* **2021**, *60*, 8313–8320.
5. Pezzetta, C.; Bonifazi, D.; Davidson, R. W. M. Enantioselective Synthesis of *N*-Benzylic Heterocycles: A Nickel and Photoredox Dual Catalysis Approach. *Org. Lett.* **2019**, *21*, 8957–8961.
6. Kim, C.; Roh, B.; Lee, H. G. Restoration of catalytic activity by the preservation of ligand structure: Cu-catalysed asymmetric conjugate addition with 1,1-diboryl methane. *Chem. Sci.*, **2021**, *12*, 3668–3673.
7. Shao, W.; Besnard, C.; Guénée, L.; Mazet, C. Ni-Catalyzed Regiodivergent and Stereoselective Hydroalkylation of Acyclic Branched Dienes with Unstabilized C(sp<sup>3</sup>) Nucleophiles. *J. Am. Chem. Soc.* **2020**, *142*, 16486–16492.

# NMR Spectra

**1a**  $^1\text{H}$  NMR (400M Hz,  $\text{CDCl}_3$ )

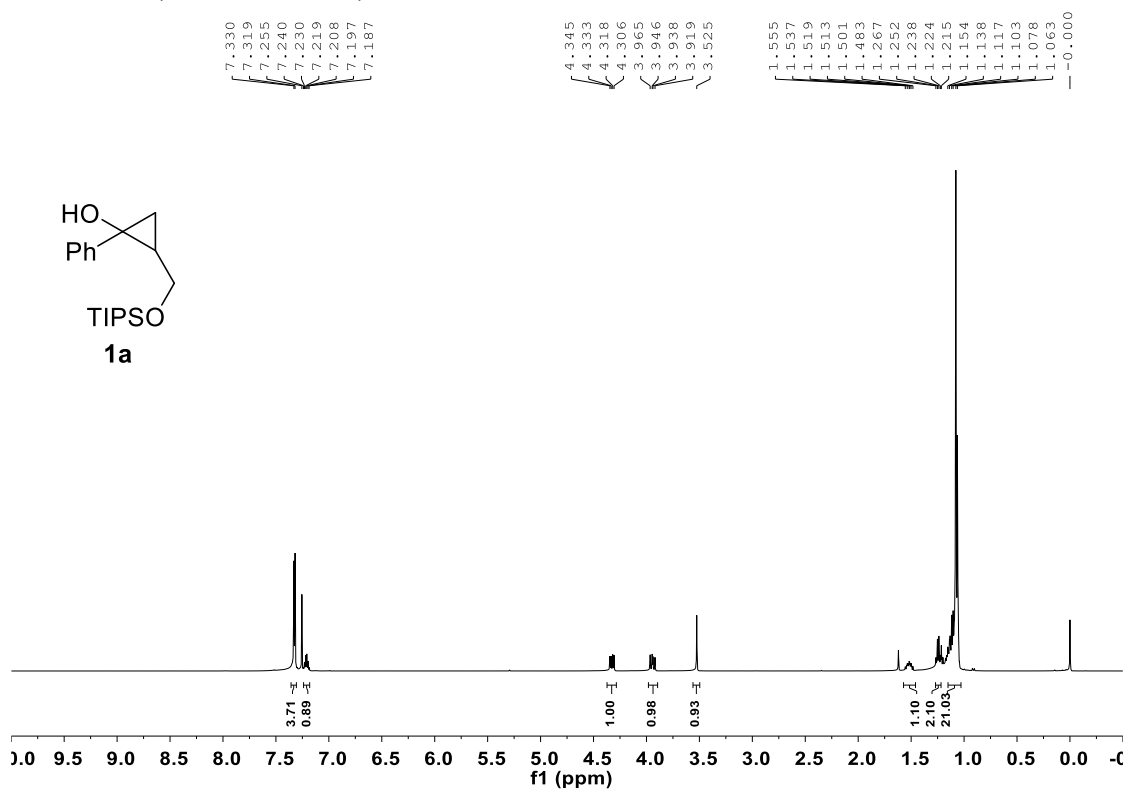

**1a**  $^{13}\text{C}$  NMR (100M Hz,  $\text{CDCl}_3$ )

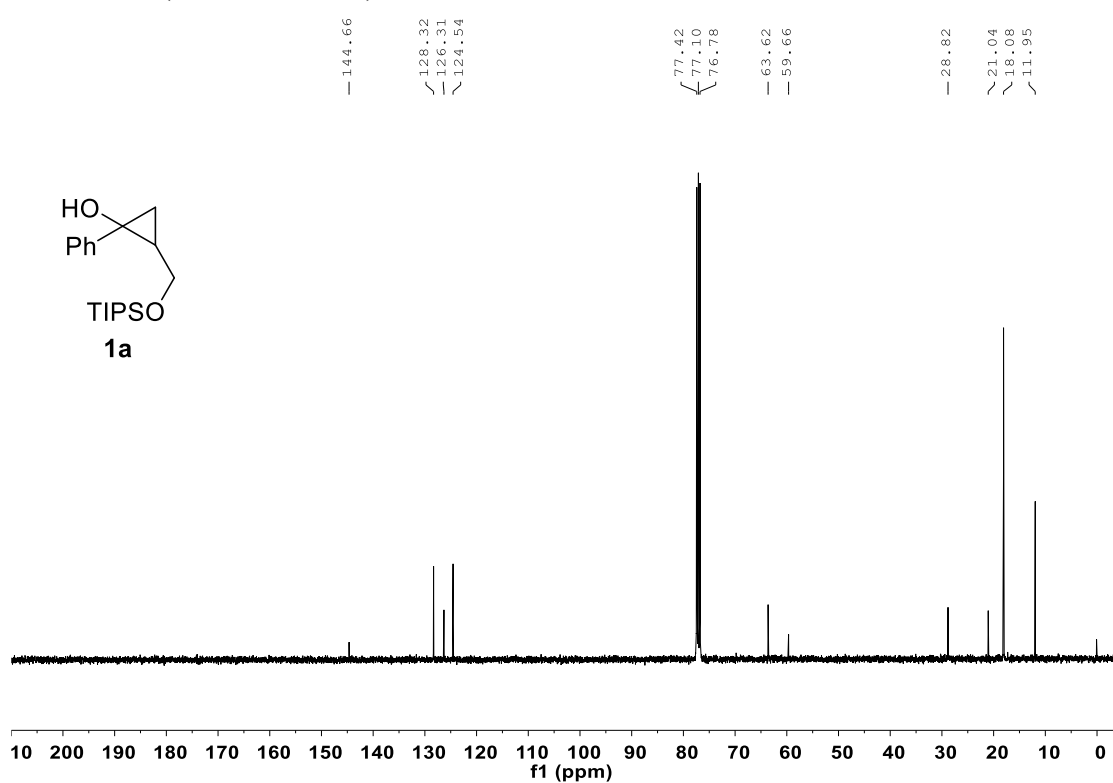

**1b** <sup>1</sup>H NMR (400M Hz, CDCl<sub>3</sub>)

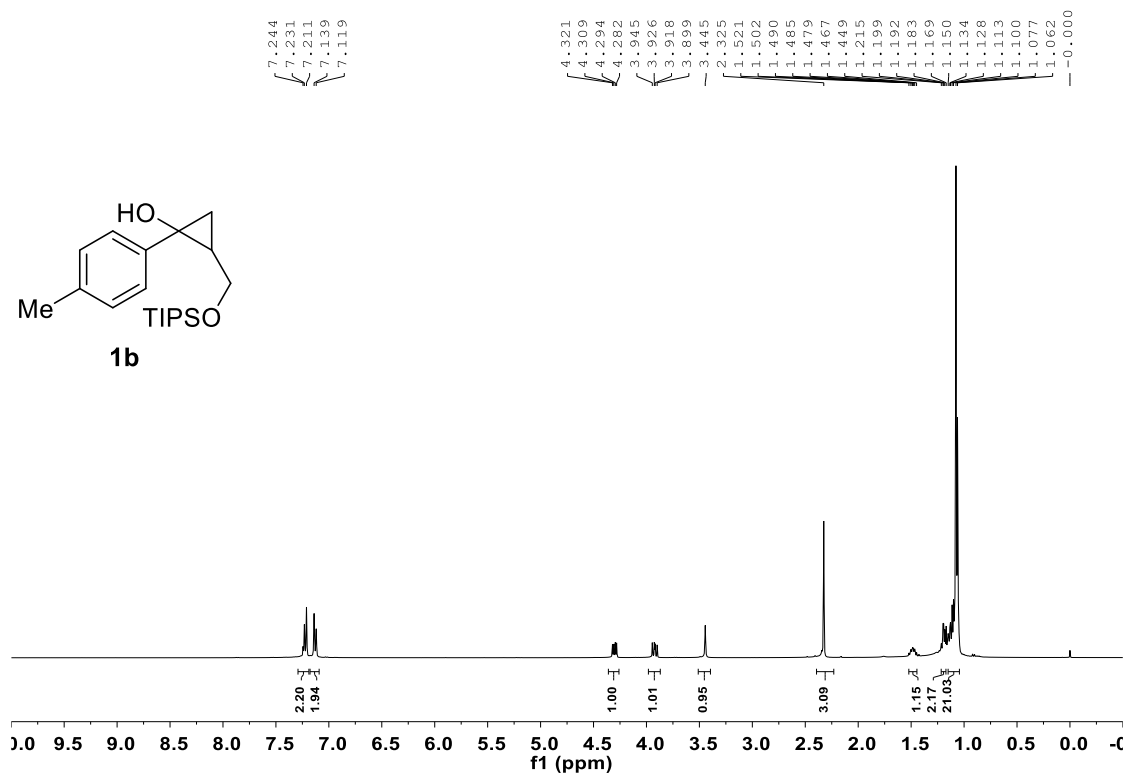

**1b** <sup>13</sup>C NMR (100M Hz, CDCl<sub>3</sub>)

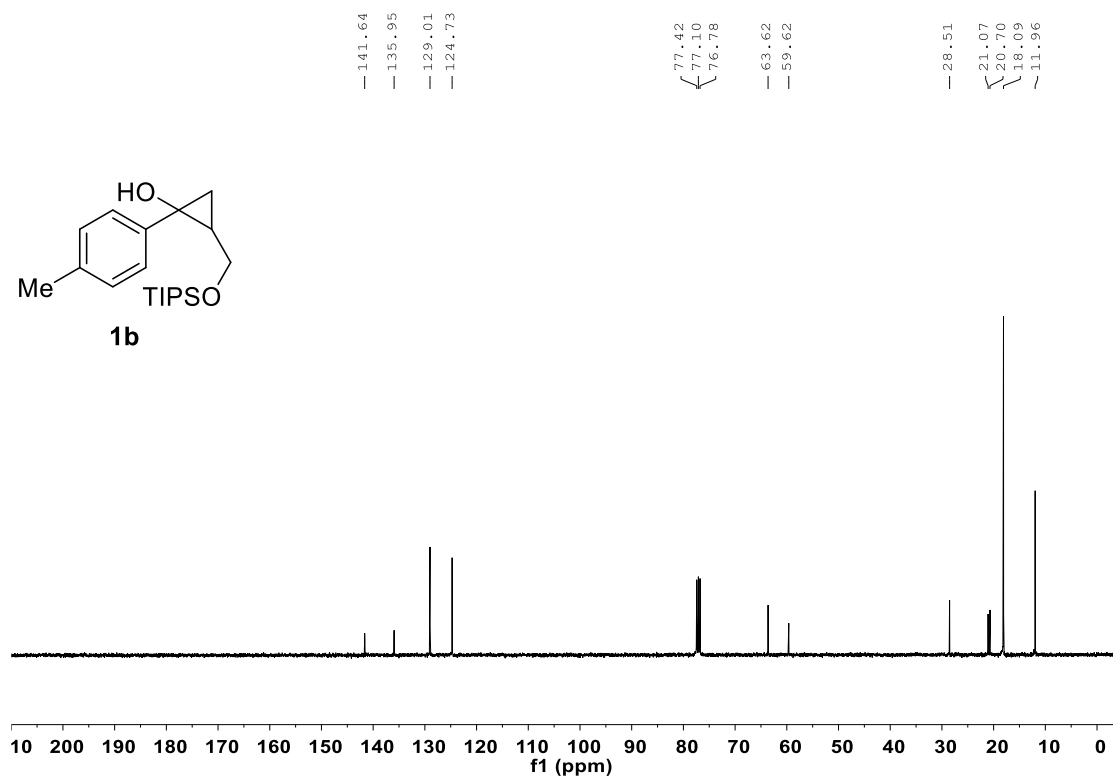

**1c** <sup>1</sup>H NMR (400M Hz, CDCl<sub>3</sub>)

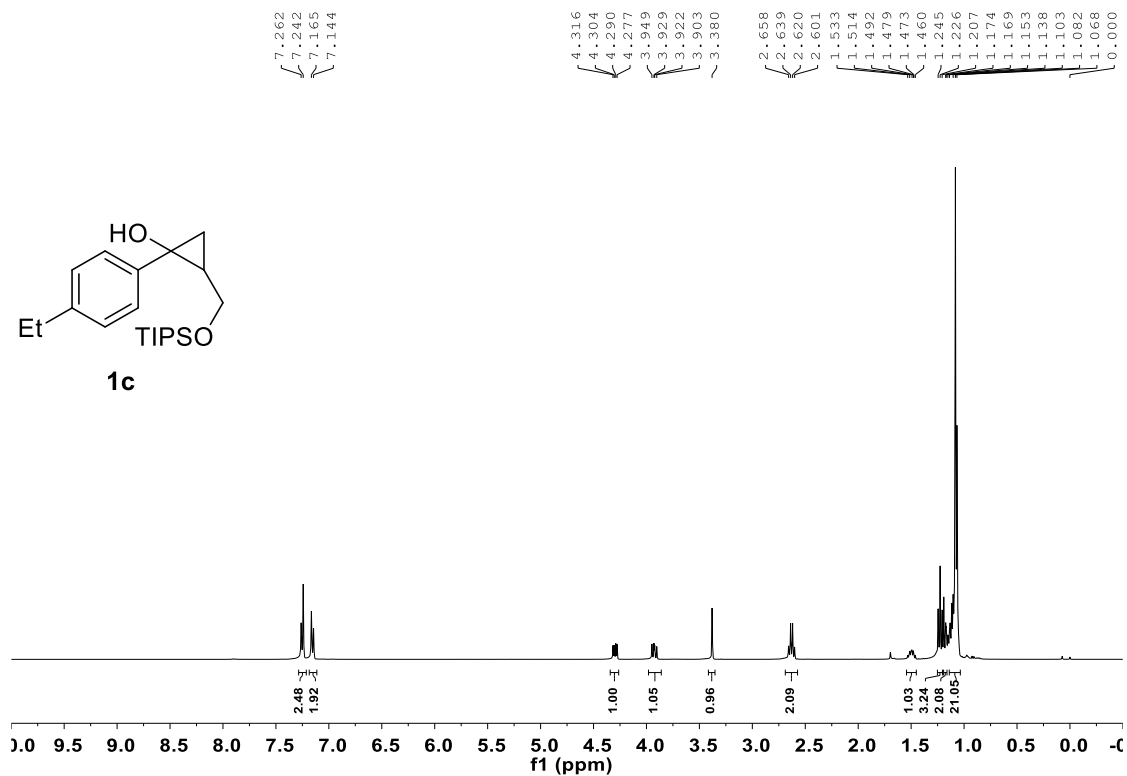

**1c** <sup>13</sup>C NMR (400M Hz, CDCl<sub>3</sub>)

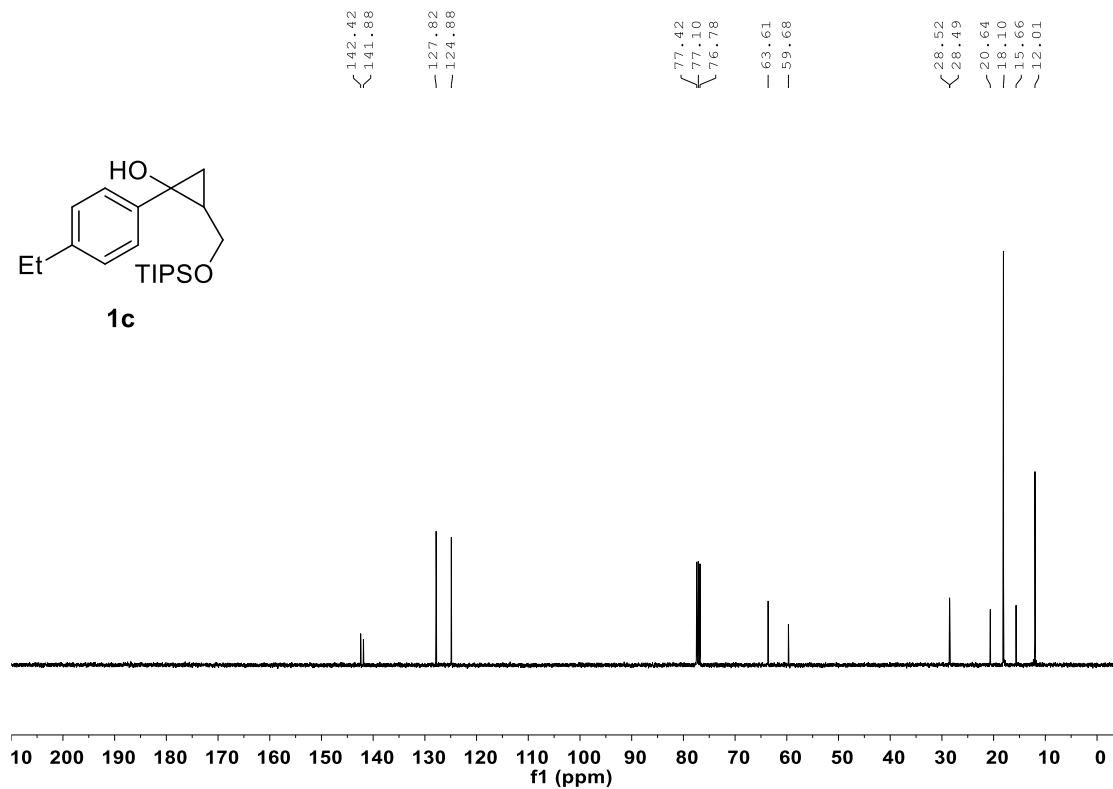

**1d** <sup>1</sup>H NMR (400M Hz, CDCl<sub>3</sub>)

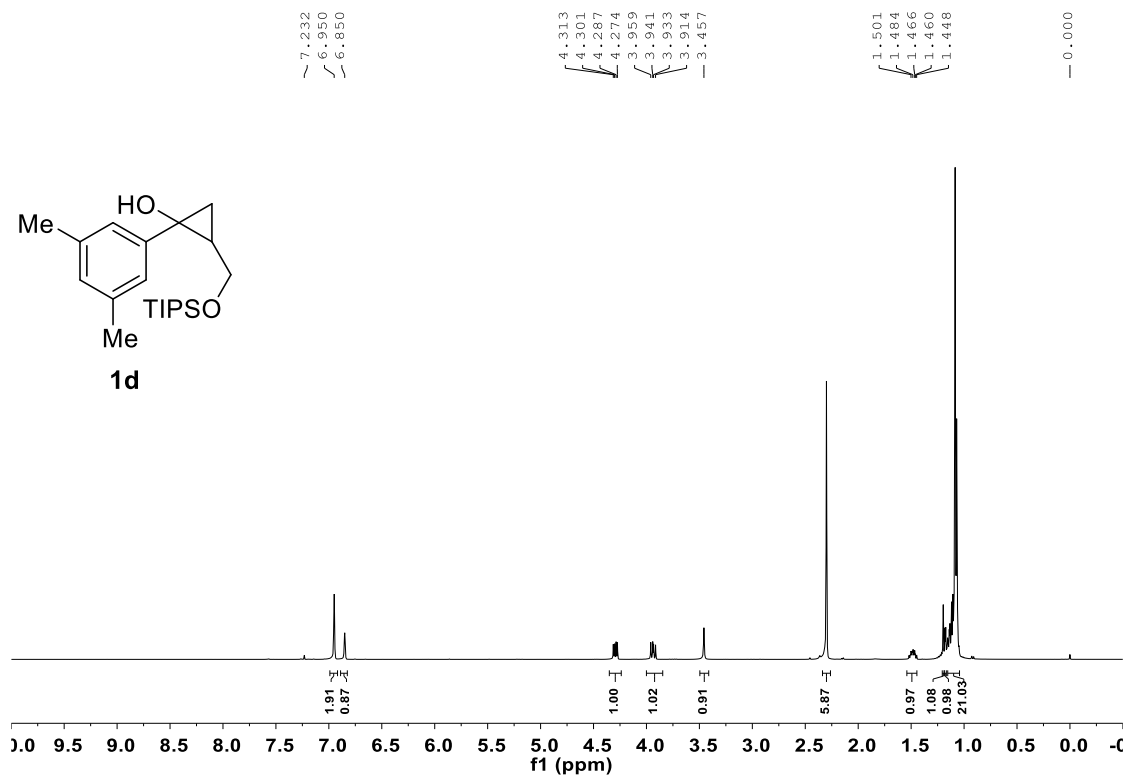

**1d** <sup>13</sup>C NMR (400M Hz, CDCl<sub>3</sub>)

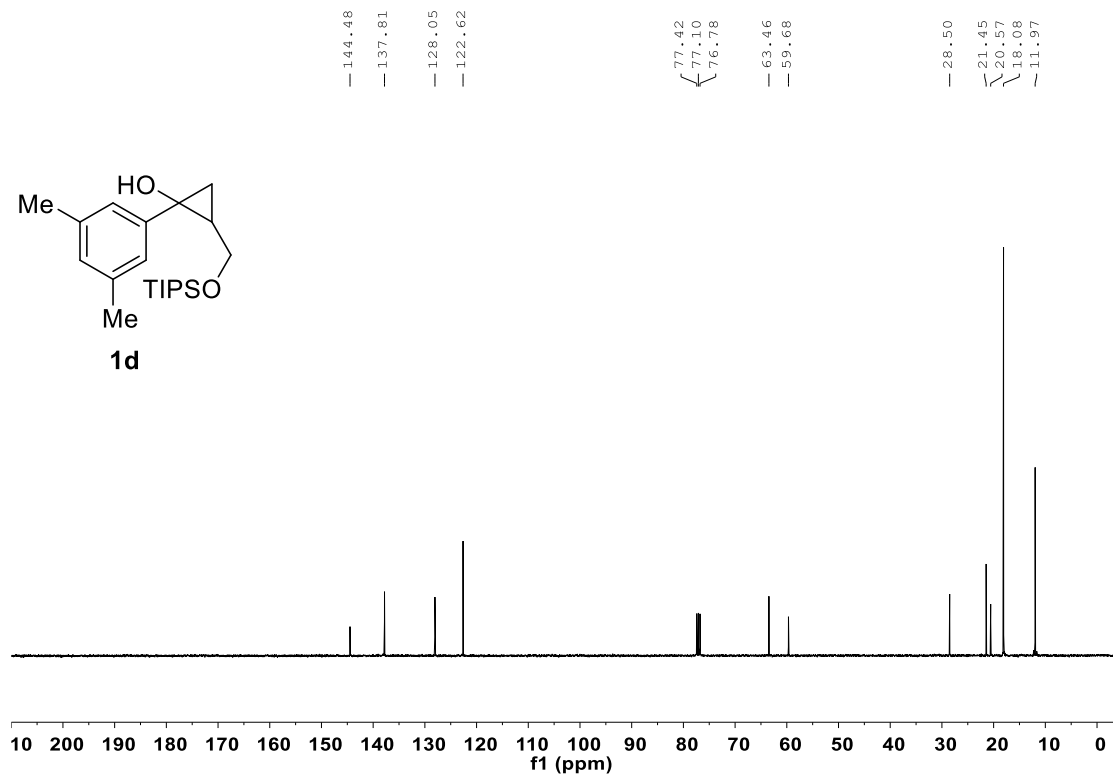

**1e** <sup>1</sup>H NMR (400M Hz, CDCl<sub>3</sub>)

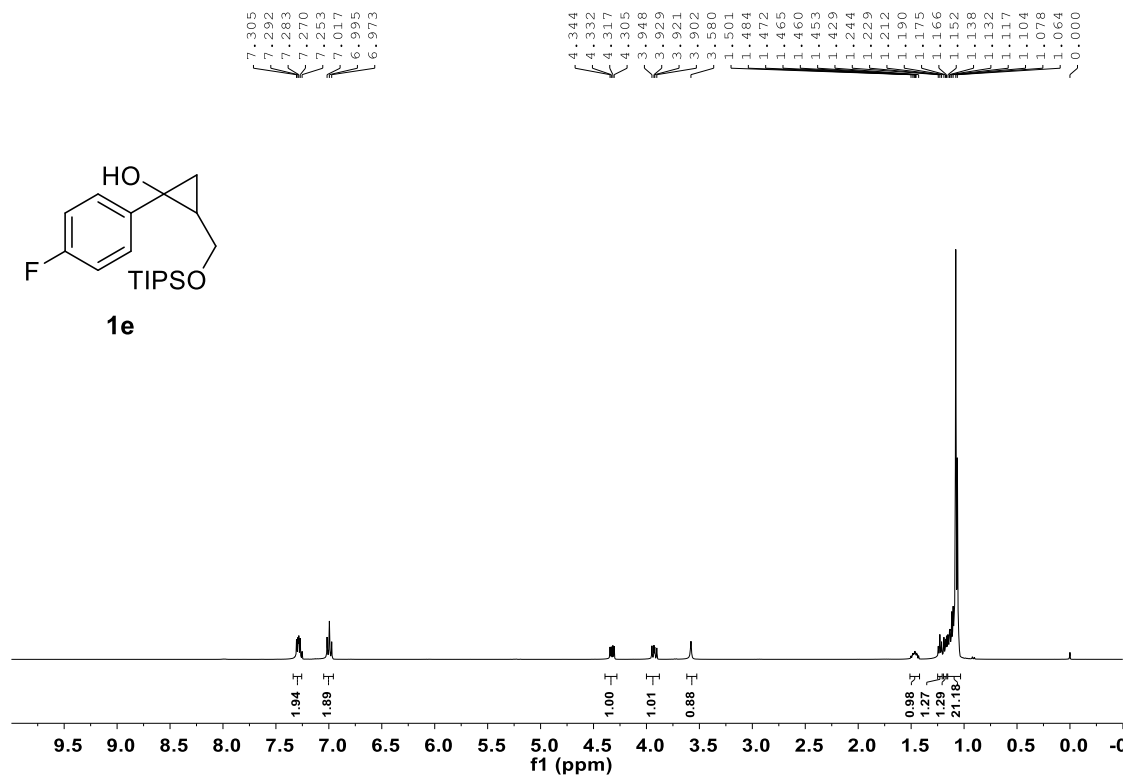

**1e** <sup>13</sup>C NMR (400M Hz, CDCl<sub>3</sub>)

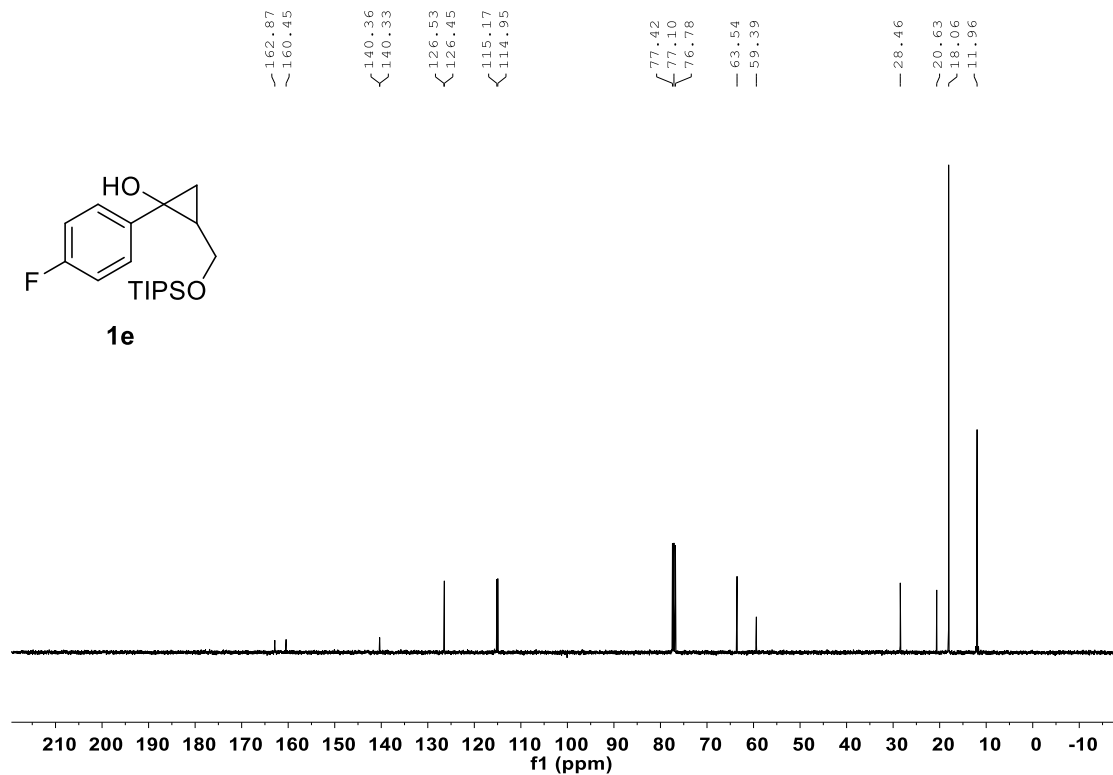

**1f** <sup>1</sup>H NMR (400M Hz, CDCl<sub>3</sub>)

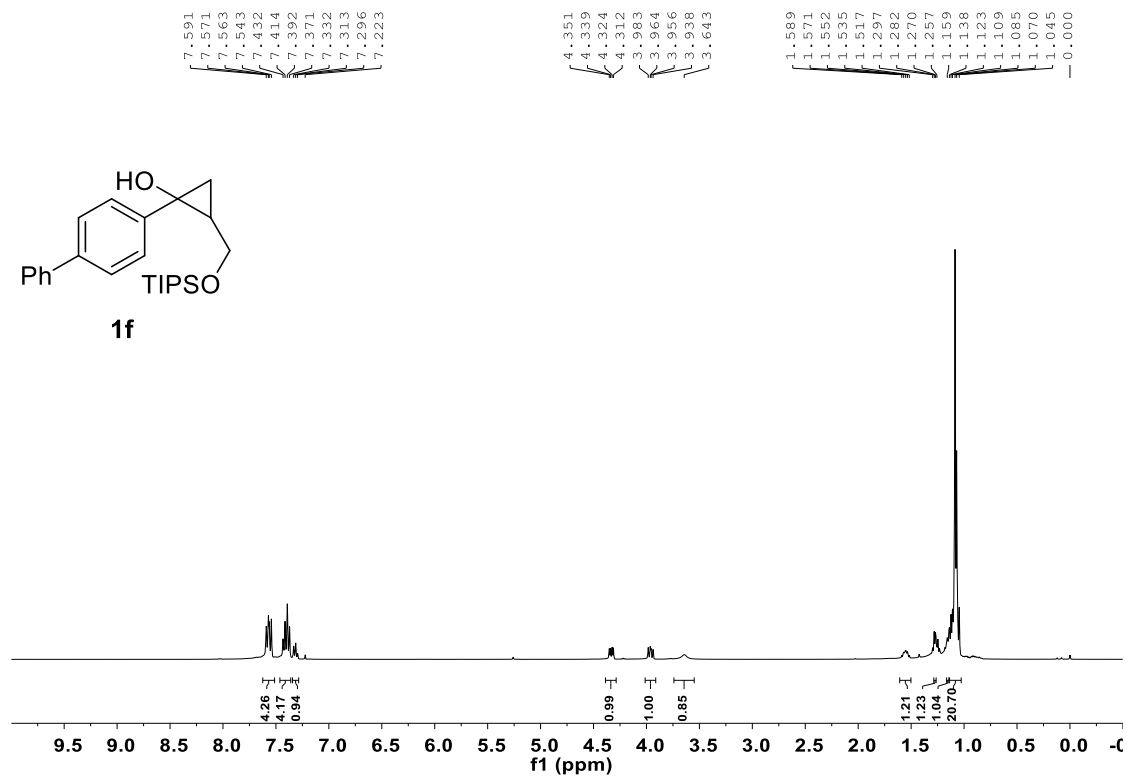

**1f** <sup>13</sup>C NMR (400M Hz, CDCl<sub>3</sub>)

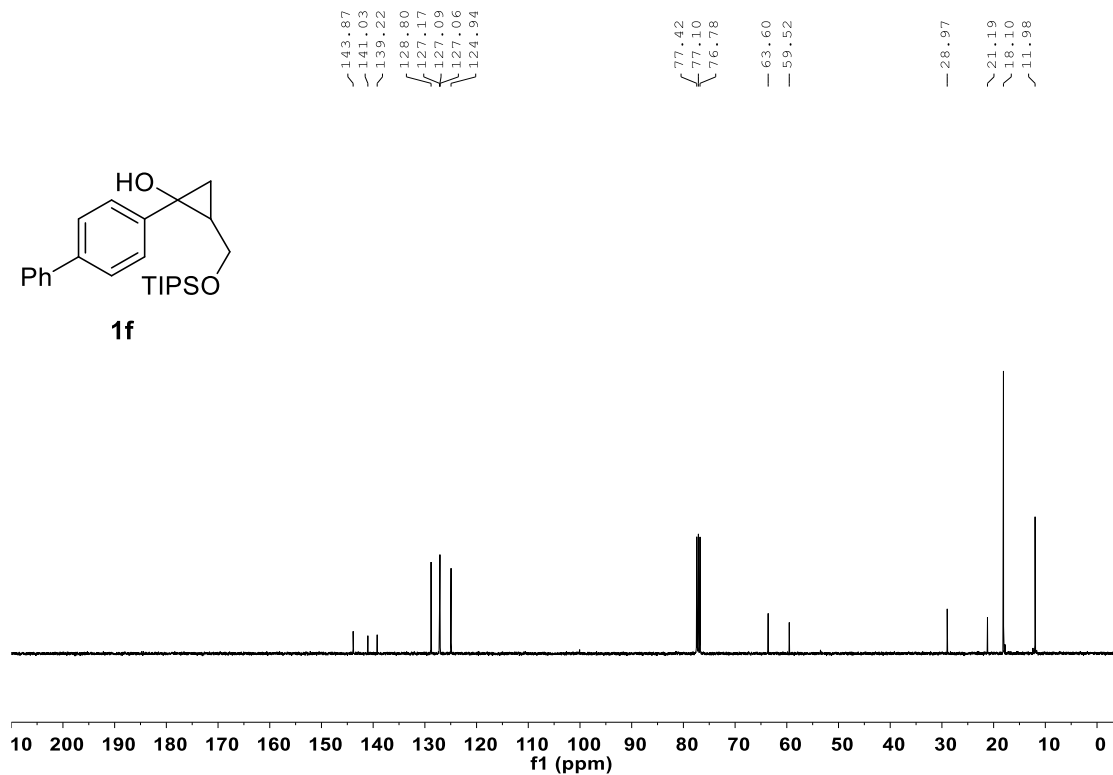

**1g**  $^1\text{H}$  NMR (400M Hz,  $\text{CDCl}_3$ )

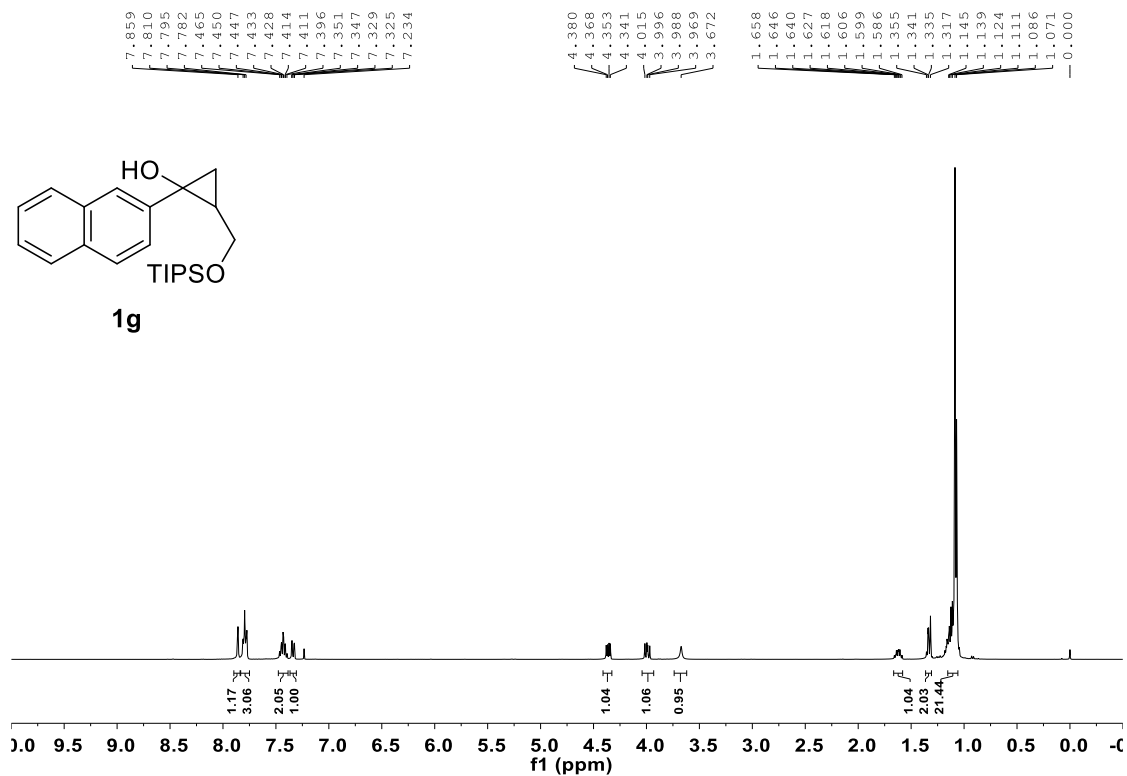

**1g**  $^{13}\text{C}$  NMR (400M Hz,  $\text{CDCl}_3$ )

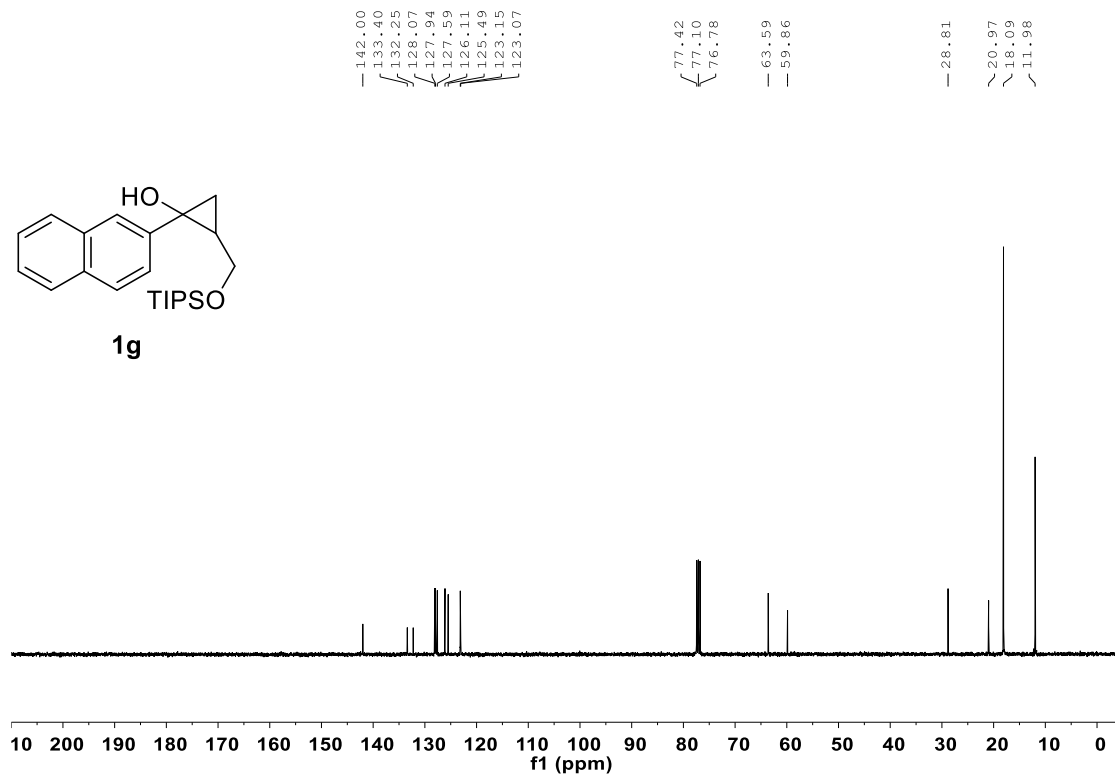



**1h**  $^1\text{H}$  NMR (400M Hz,  $\text{CDCl}_3$ )

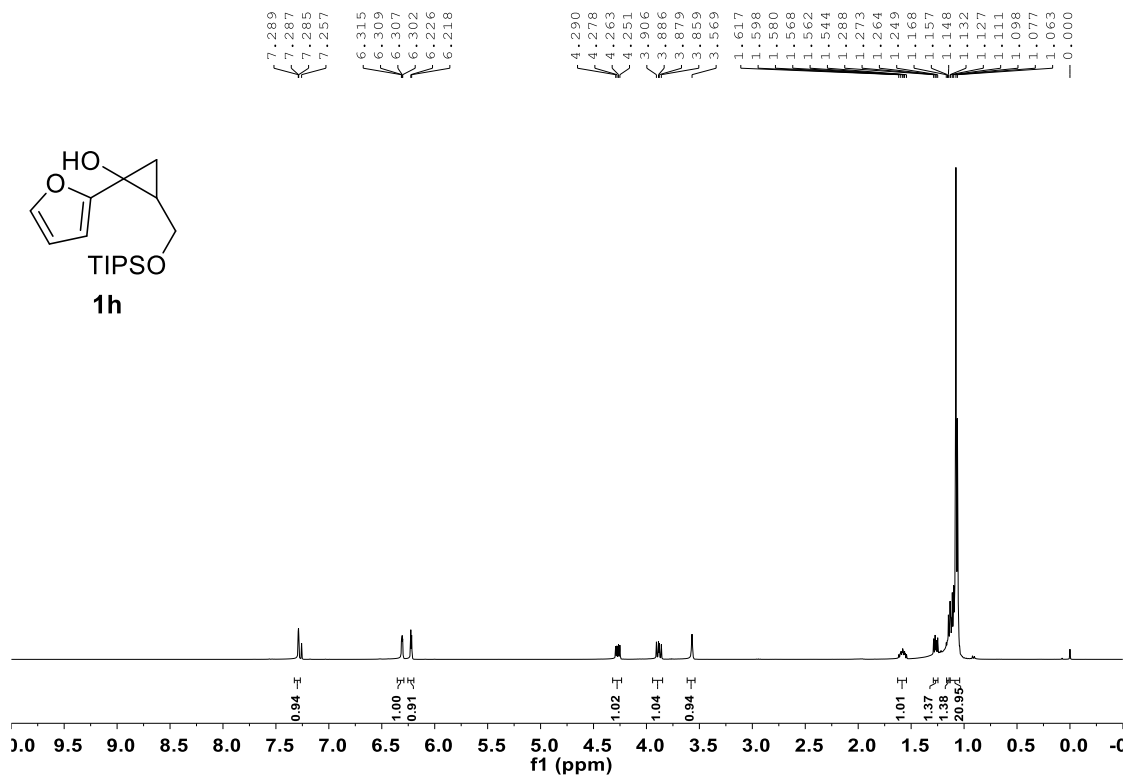

**1h**  $^{13}\text{C}$  NMR (400M Hz,  $\text{CDCl}_3$ )

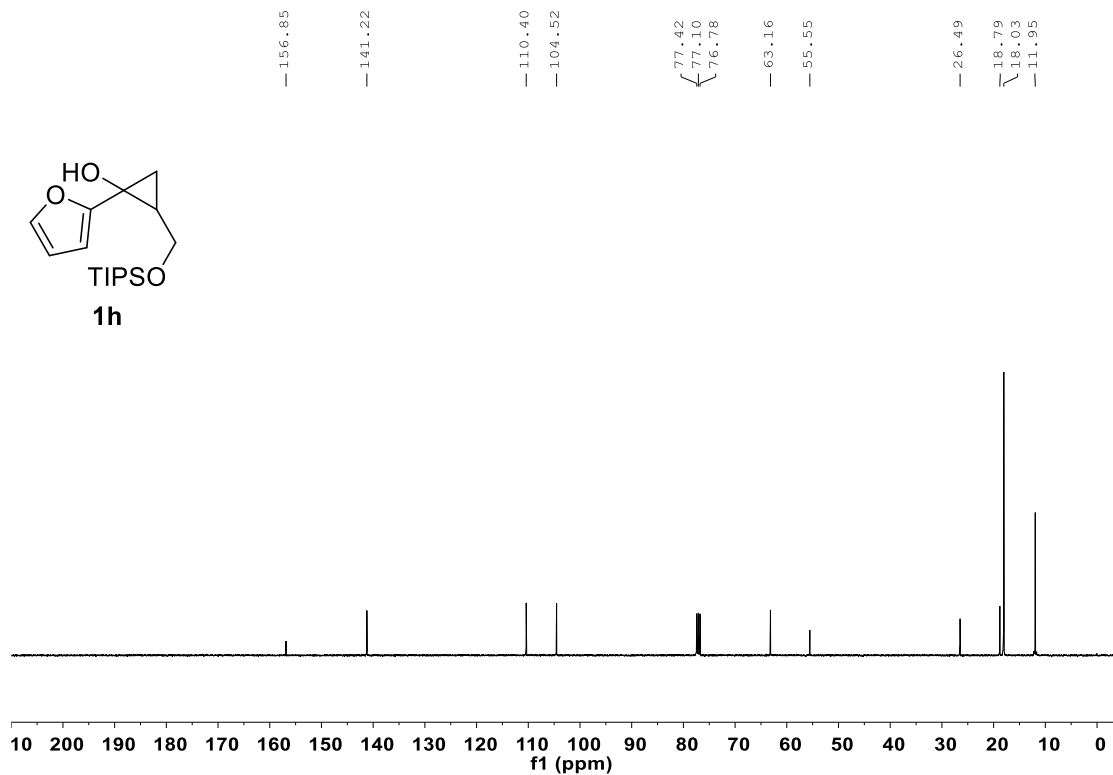

**1i** <sup>1</sup>H NMR (400M Hz, CDCl<sub>3</sub>)

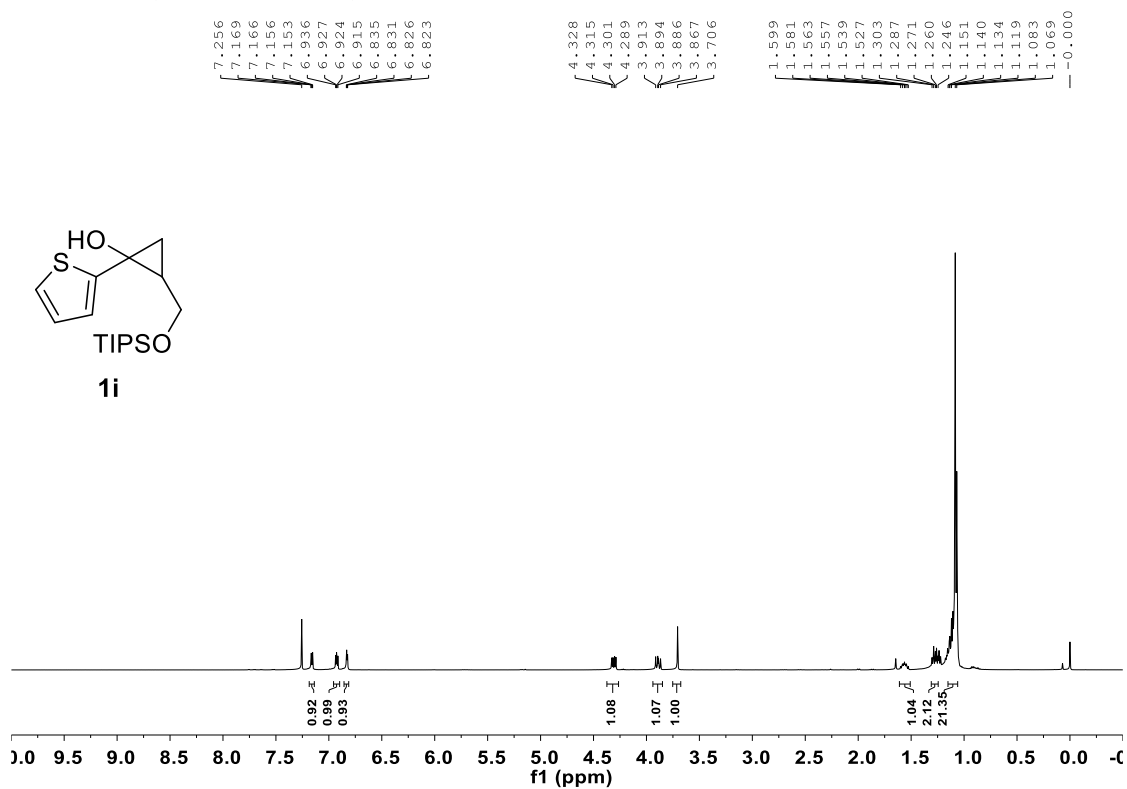

**1i** <sup>13</sup>C NMR (400M Hz, CDCl<sub>3</sub>)

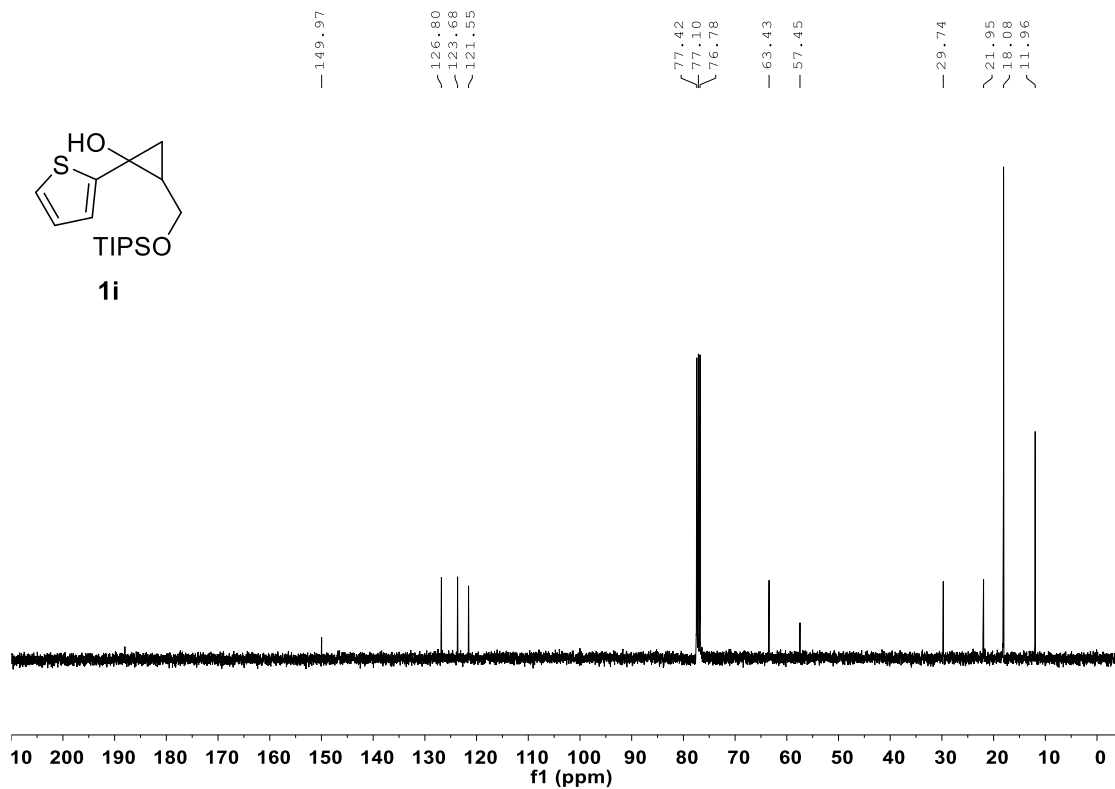

**1j** <sup>1</sup>H NMR (400M Hz, CDCl<sub>3</sub>)

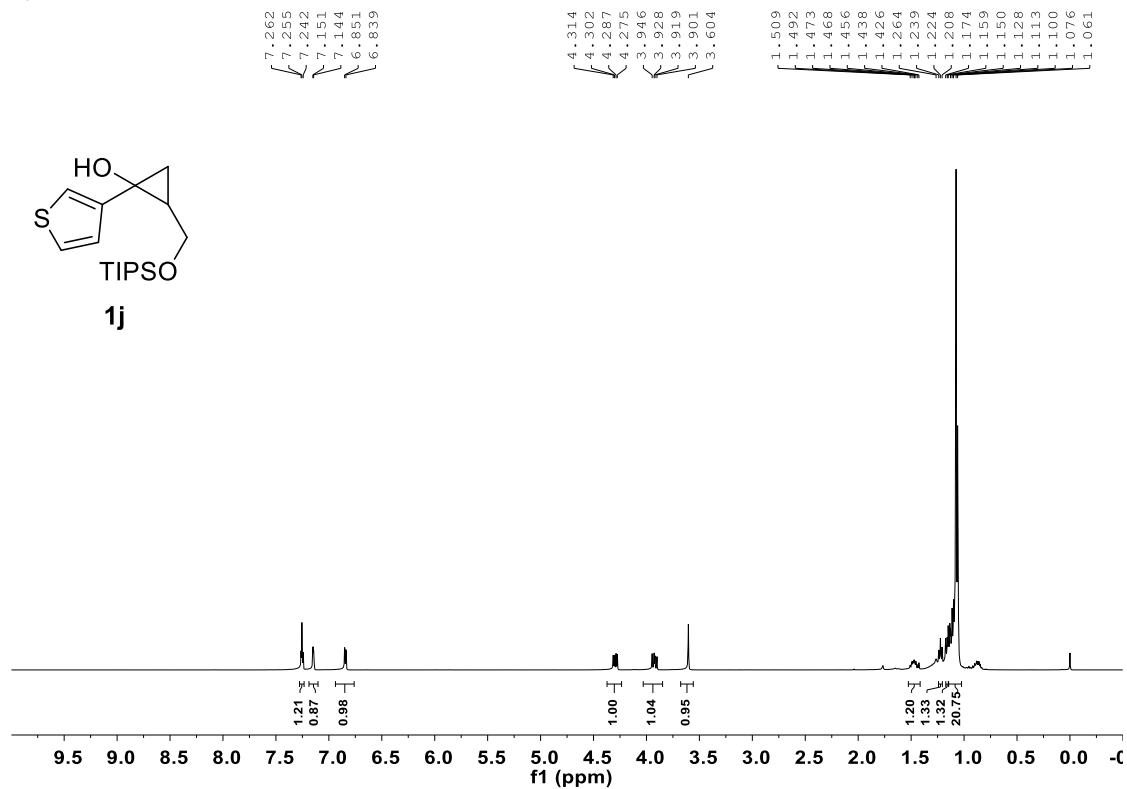

**1j** <sup>13</sup>C NMR (400M Hz, CDCl<sub>3</sub>)

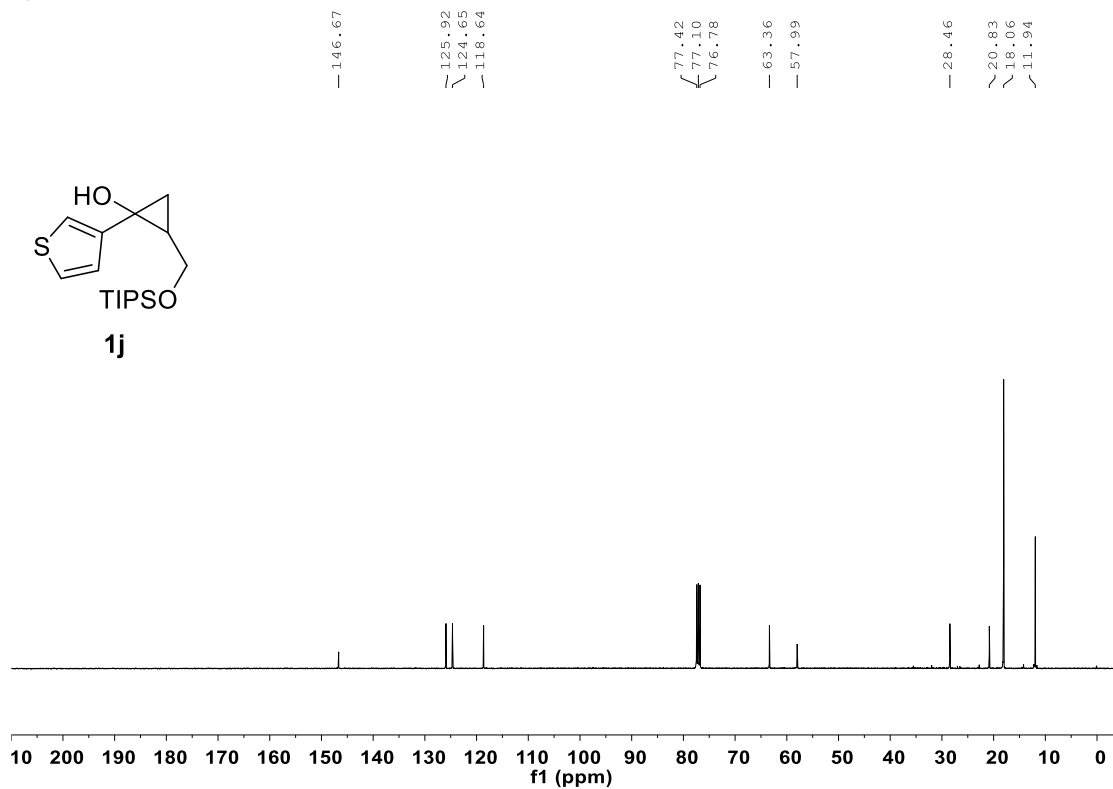

**1k** <sup>1</sup>H NMR (400M Hz, CDCl<sub>3</sub>)

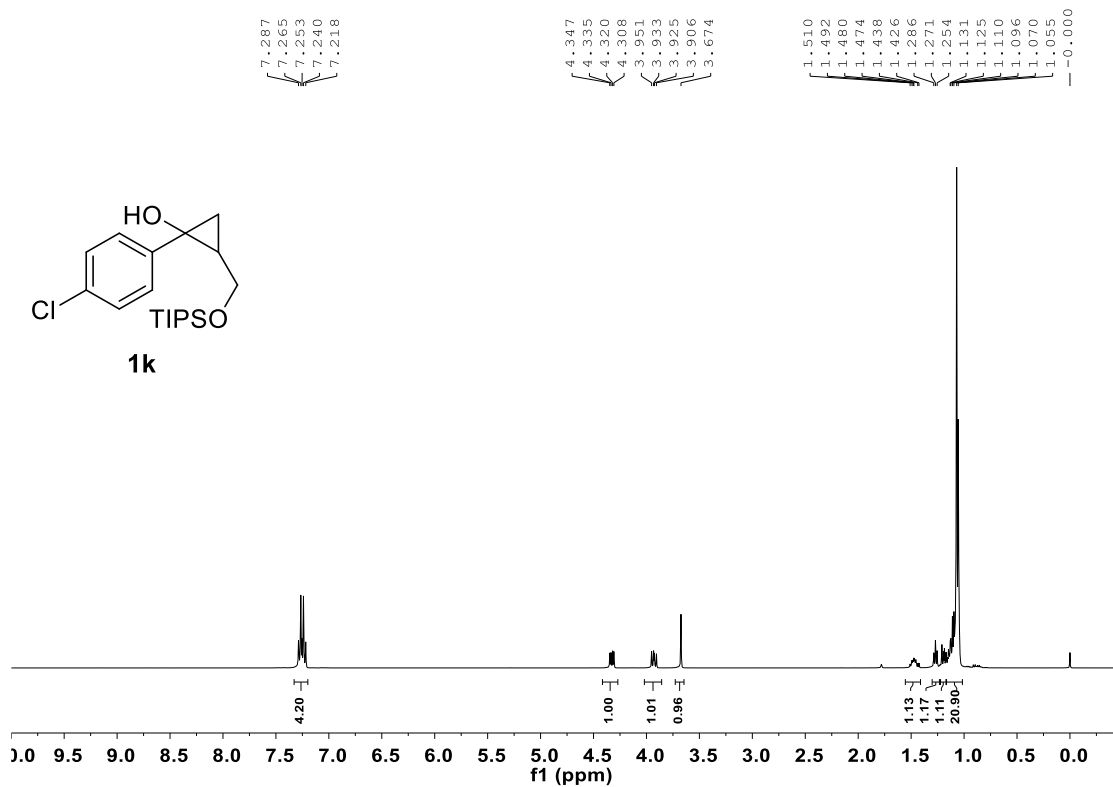

**1k** <sup>13</sup>C NMR (400M Hz, CDCl<sub>3</sub>)

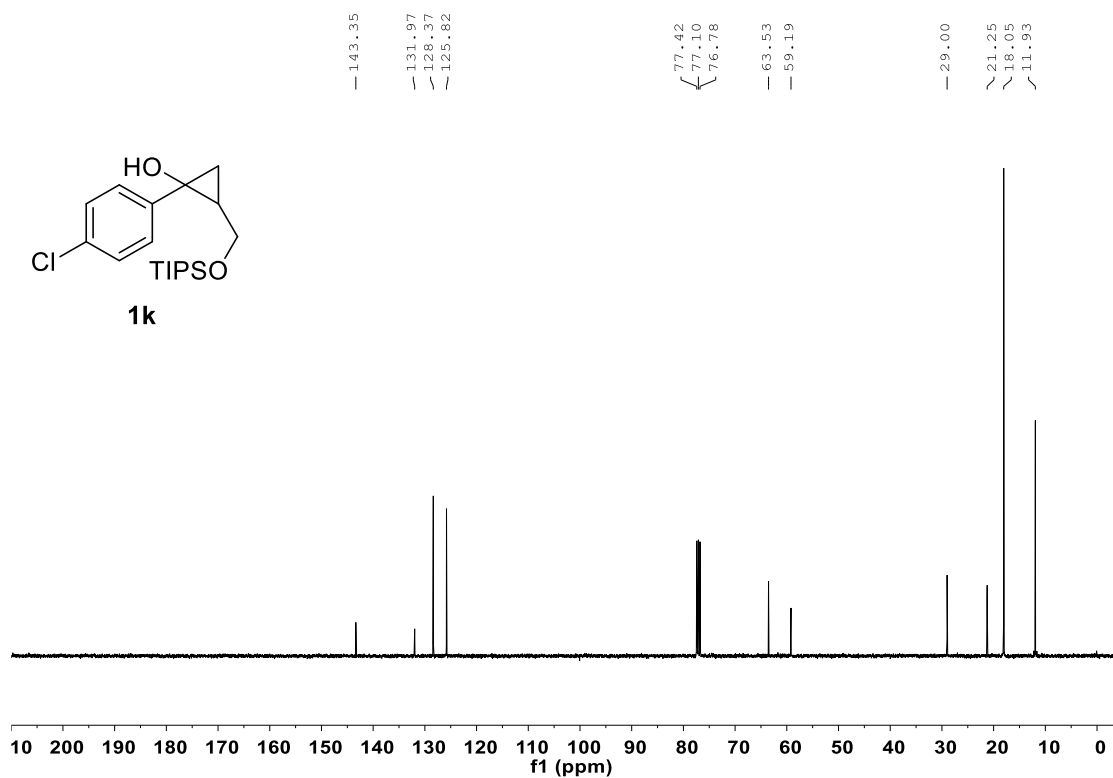

**L6**  $^1\text{H}$  NMR (400M Hz,  $\text{CDCl}_3$ )

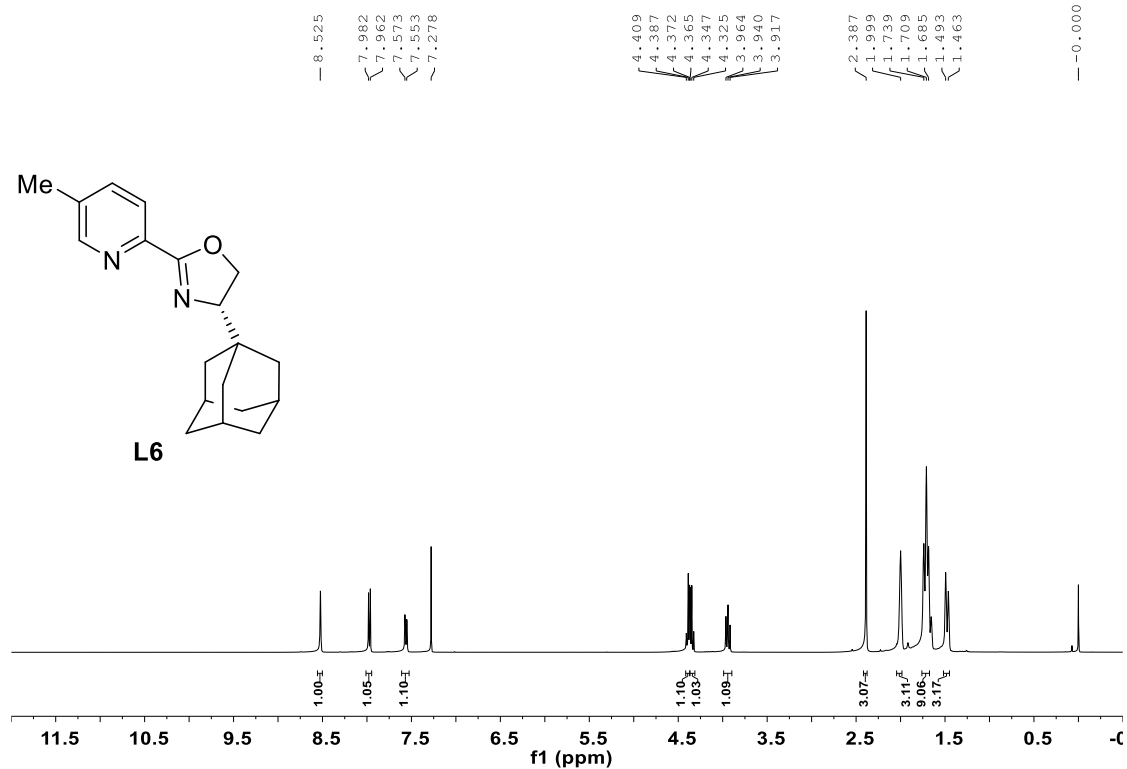

**L6**  $^{13}\text{C}$  NMR (400M Hz,  $\text{CDCl}_3$ )

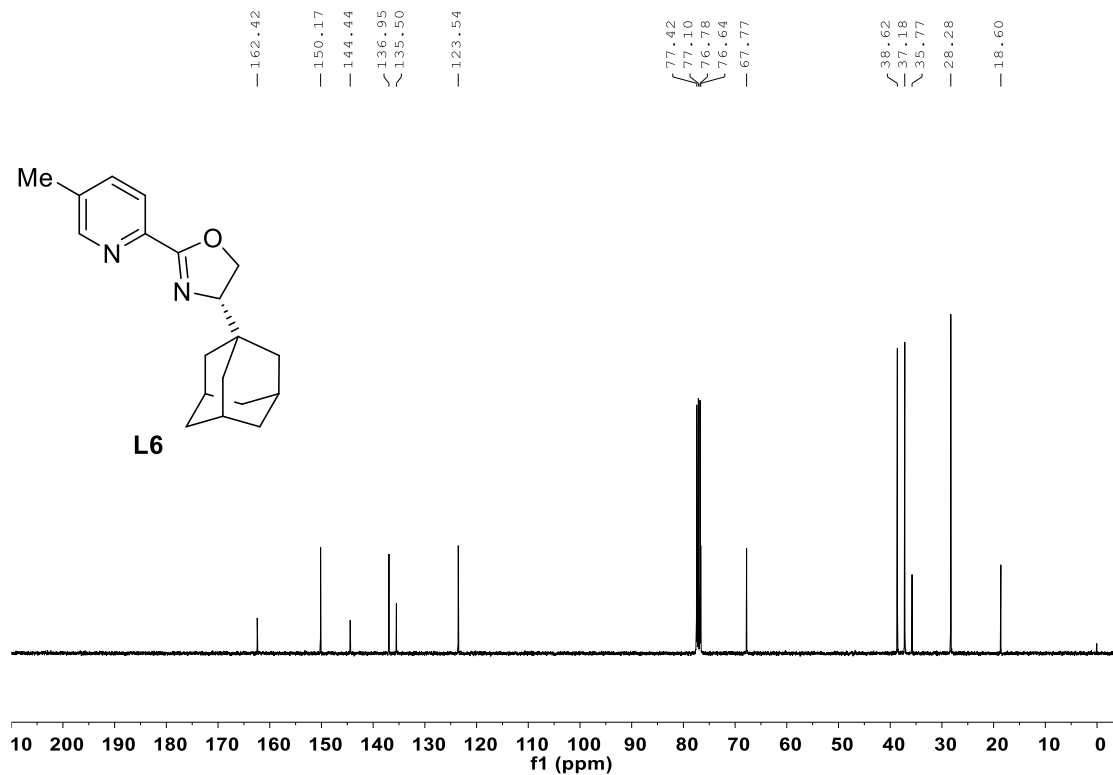

**3a** <sup>1</sup>H NMR (400M Hz, CDCl<sub>3</sub>)

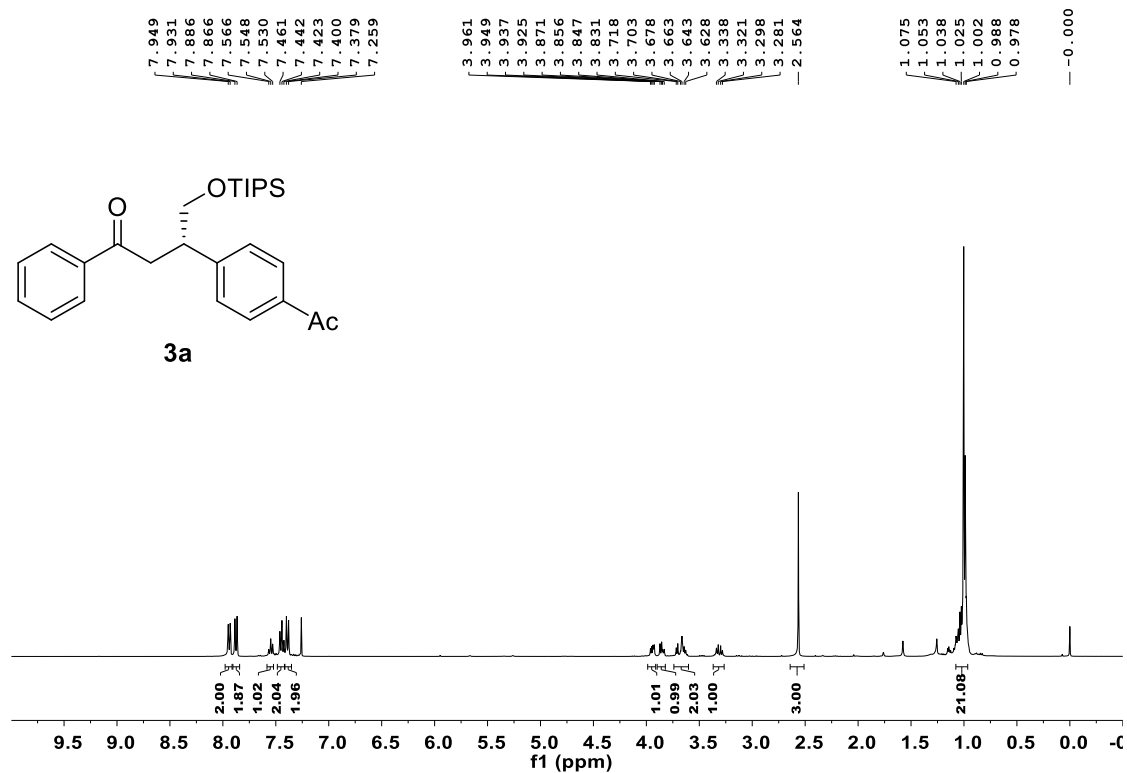

**3a** <sup>13</sup>C NMR (400M Hz, CDCl<sub>3</sub>)

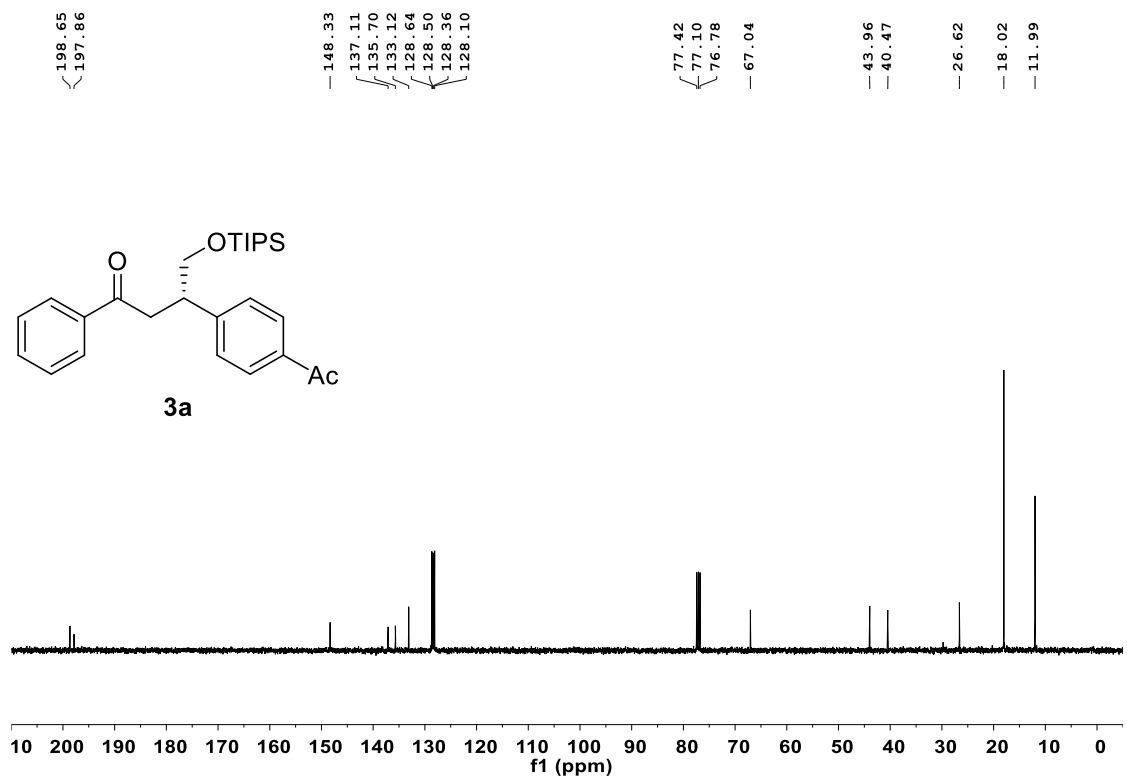

**3b** <sup>1</sup>H NMR (400M Hz, CDCl<sub>3</sub>)

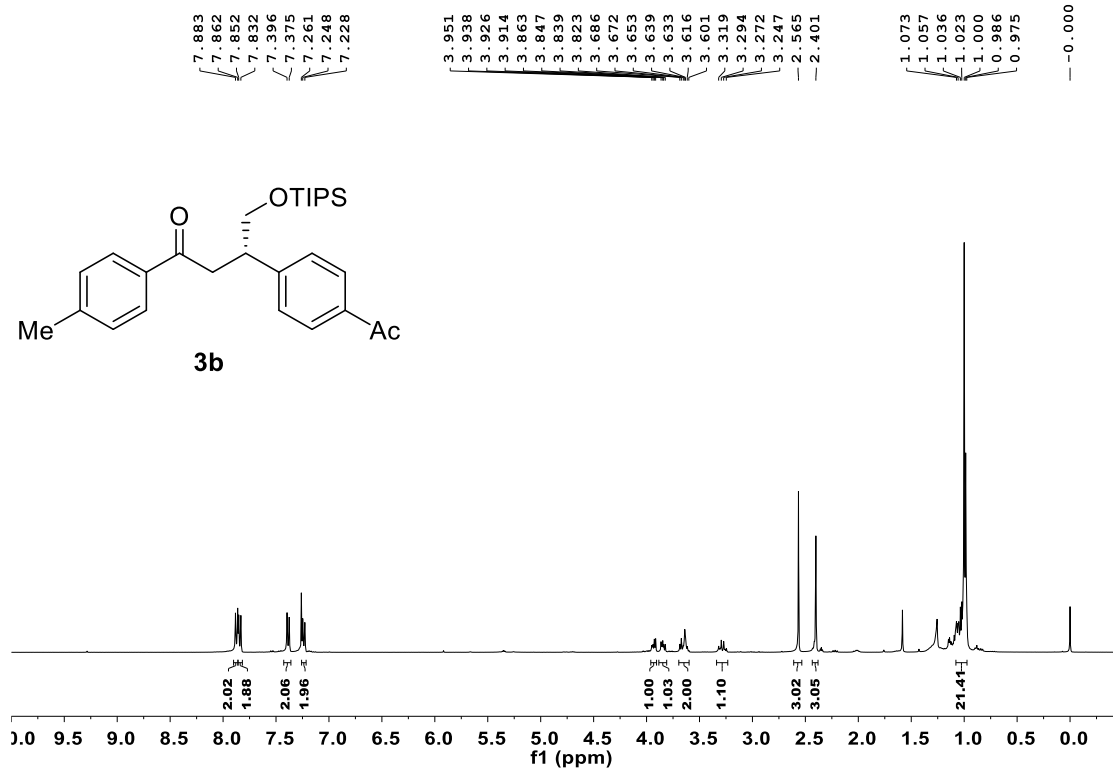

**3b** <sup>13</sup>C NMR (400M Hz, CDCl<sub>3</sub>)

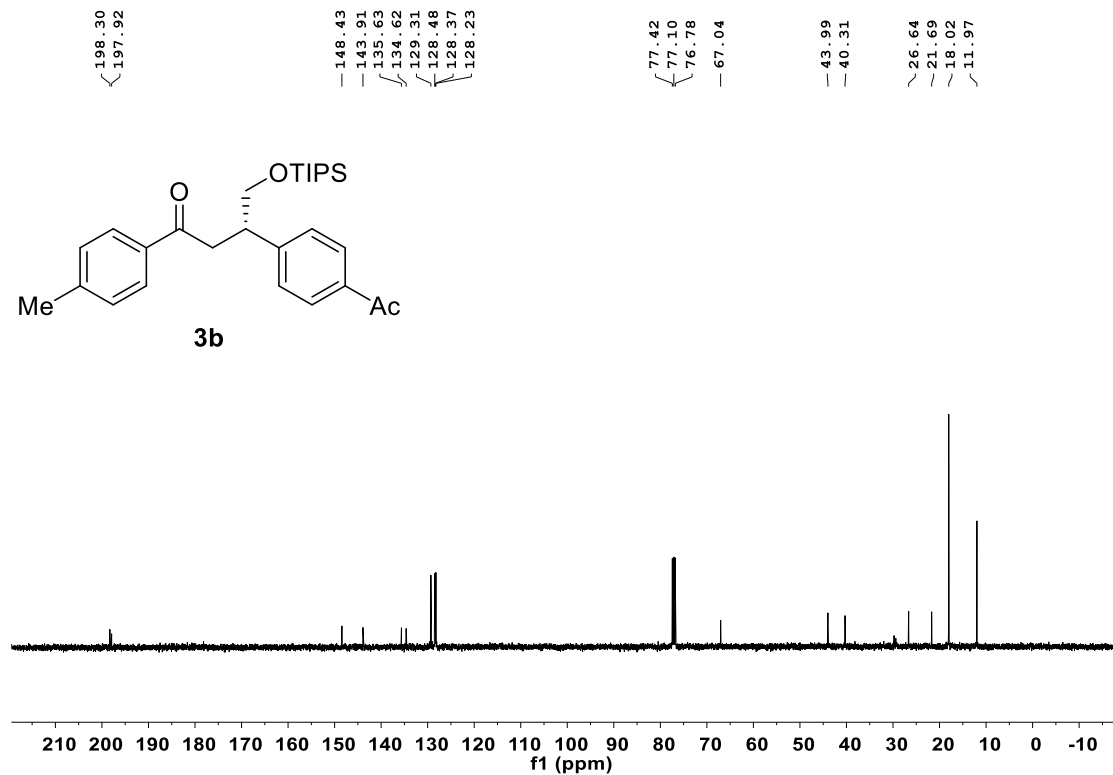

**3c** <sup>1</sup>H NMR (400M Hz, CDCl<sub>3</sub>)

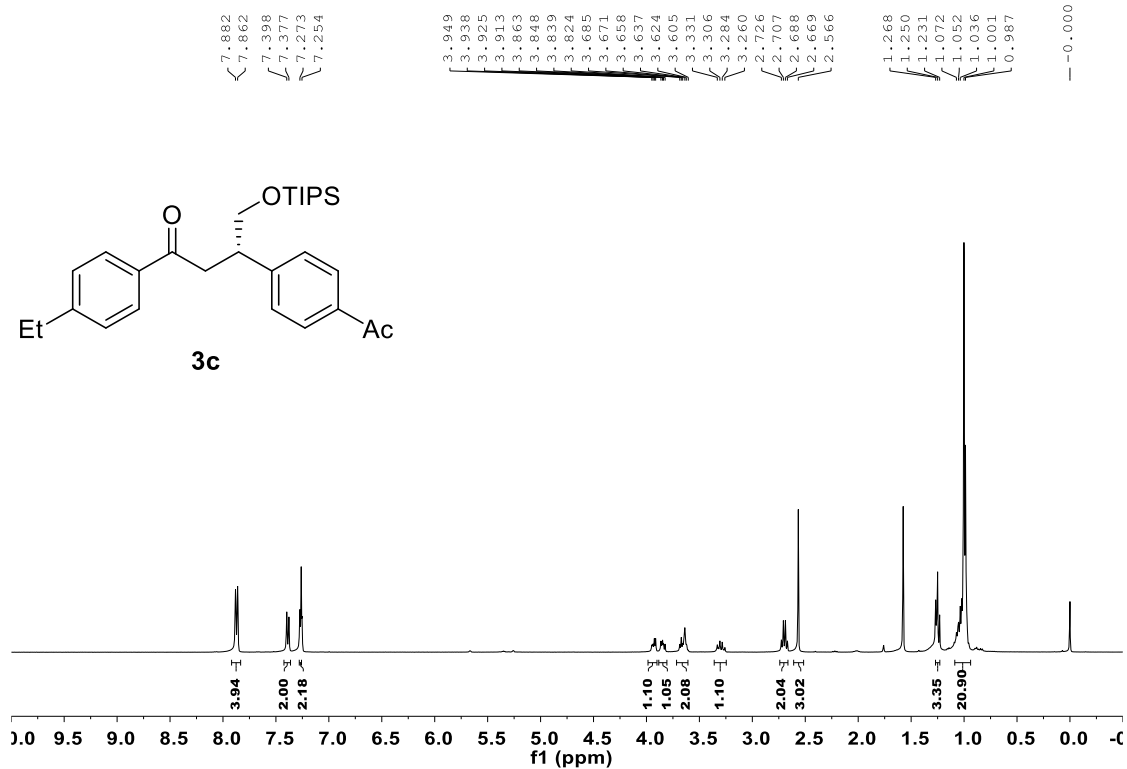

**3c** <sup>13</sup>C NMR (400M Hz, CDCl<sub>3</sub>)

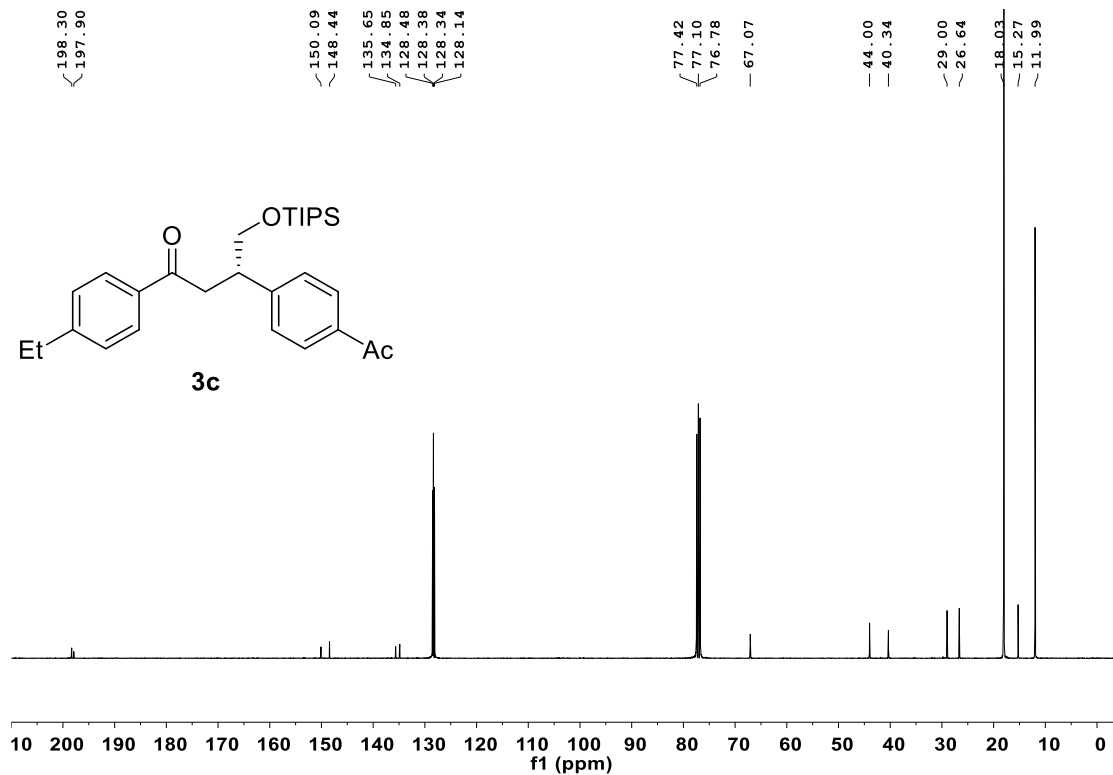



**3d**  $^1\text{H}$  NMR (400M Hz,  $\text{CDCl}_3$ )

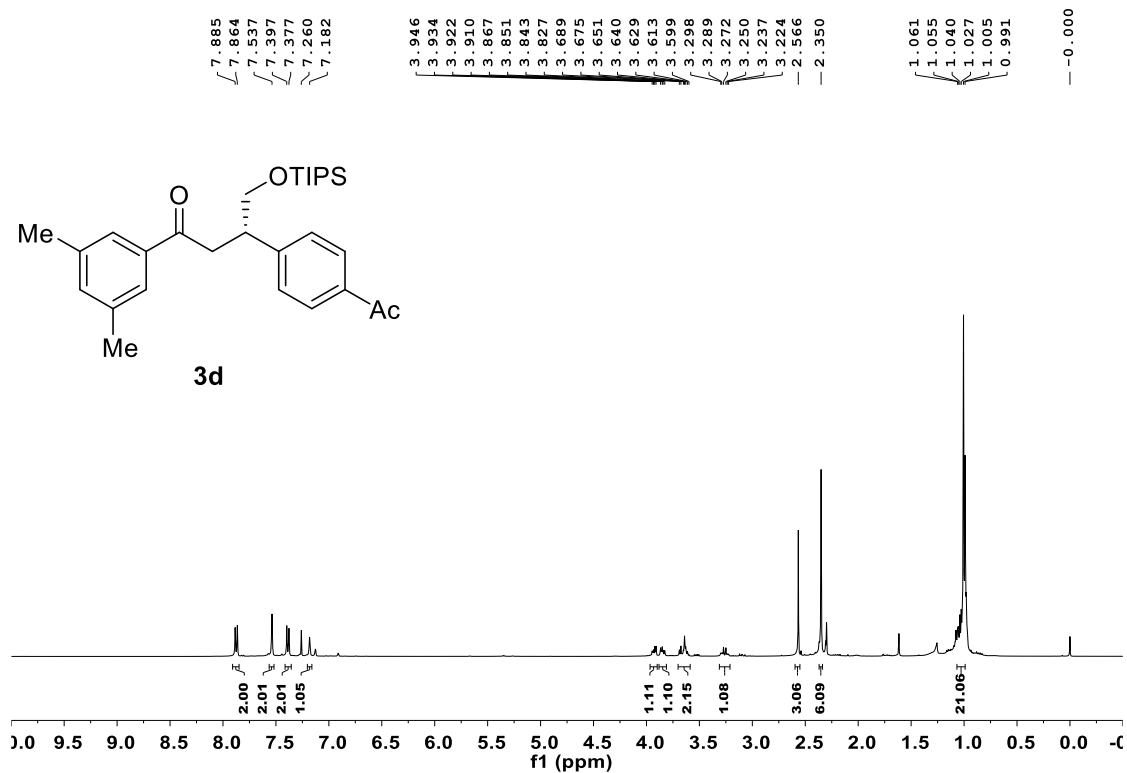

**3d**  $^{13}\text{C}$  NMR (400M Hz,  $\text{CDCl}_3$ )

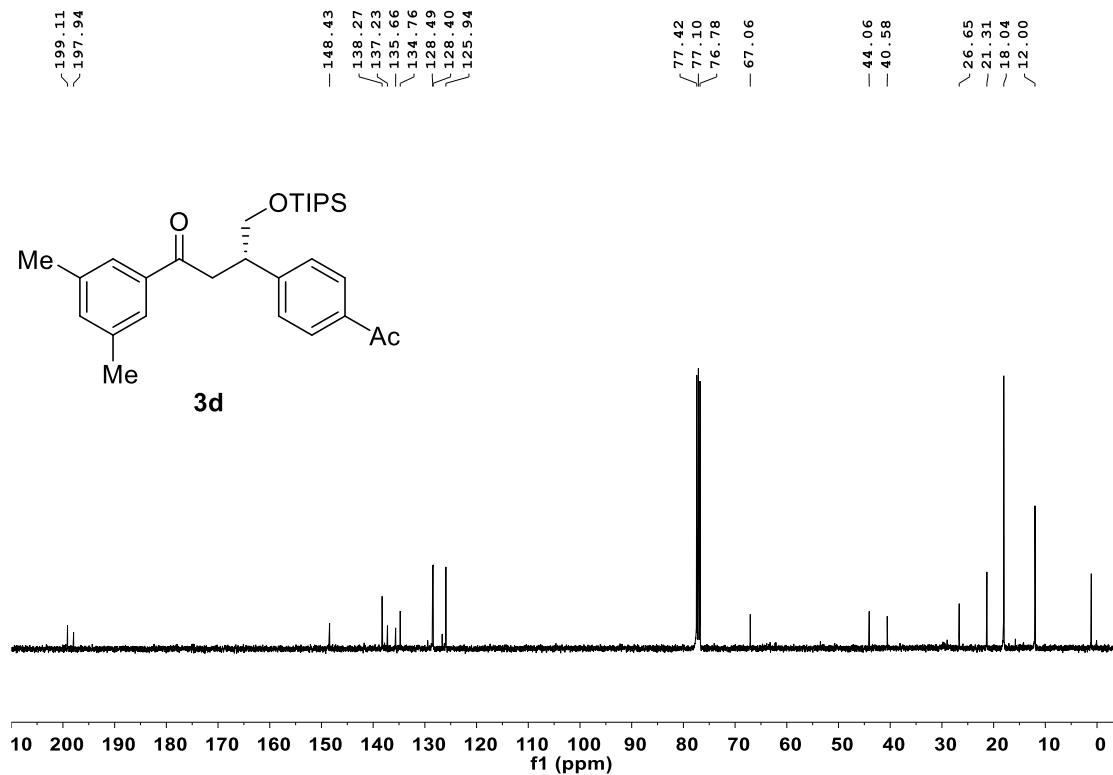

**3e** <sup>1</sup>H NMR (400M Hz, CDCl<sub>3</sub>)

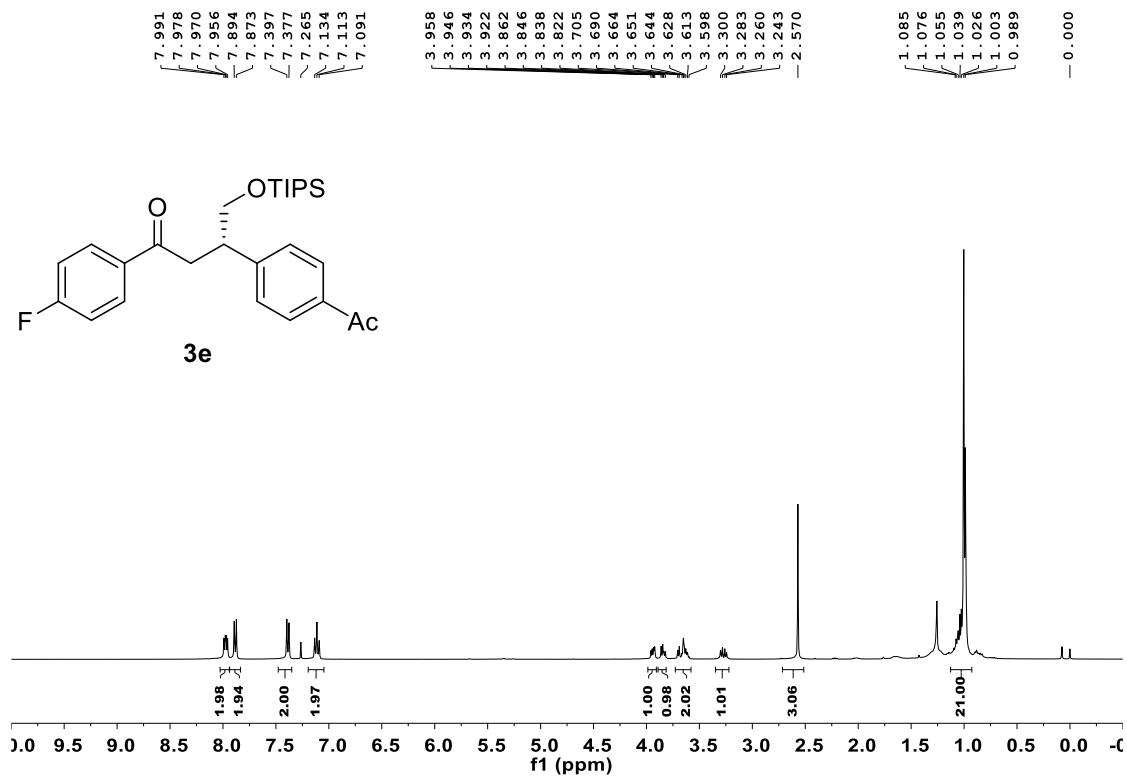

**3e** <sup>13</sup>C NMR (400M Hz, CDCl<sub>3</sub>)

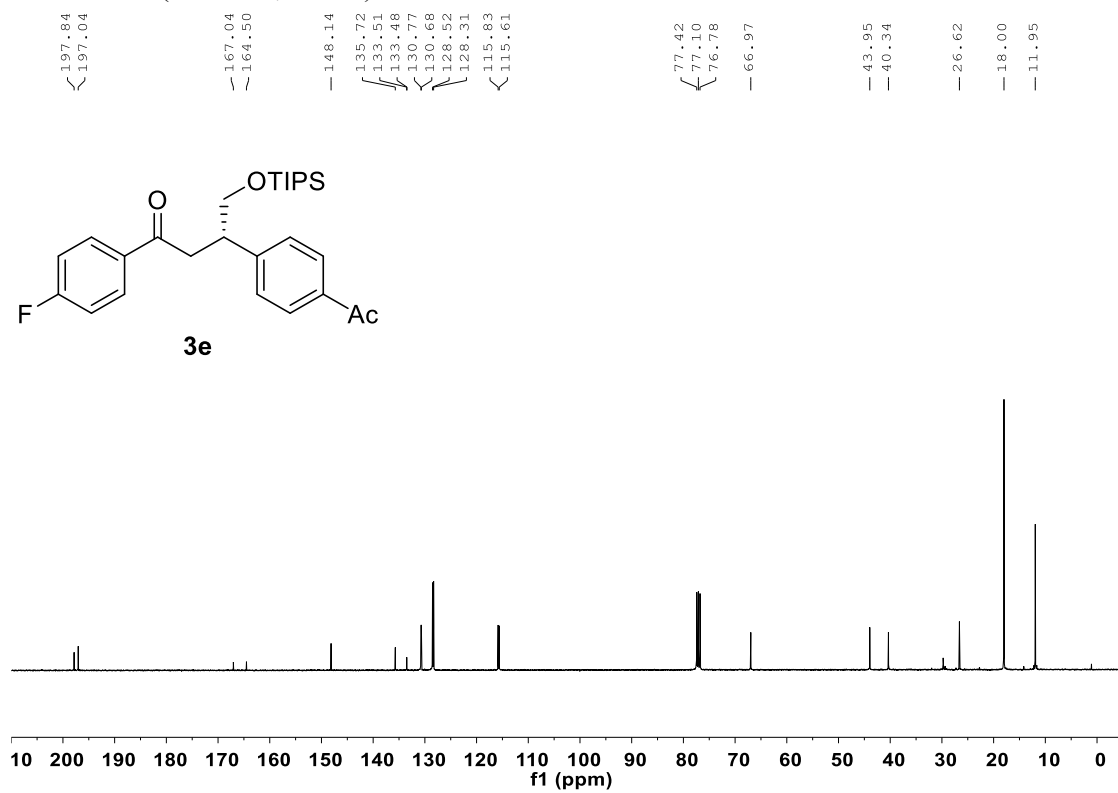

**3f** <sup>1</sup>H NMR (400M Hz, CDCl<sub>3</sub>)

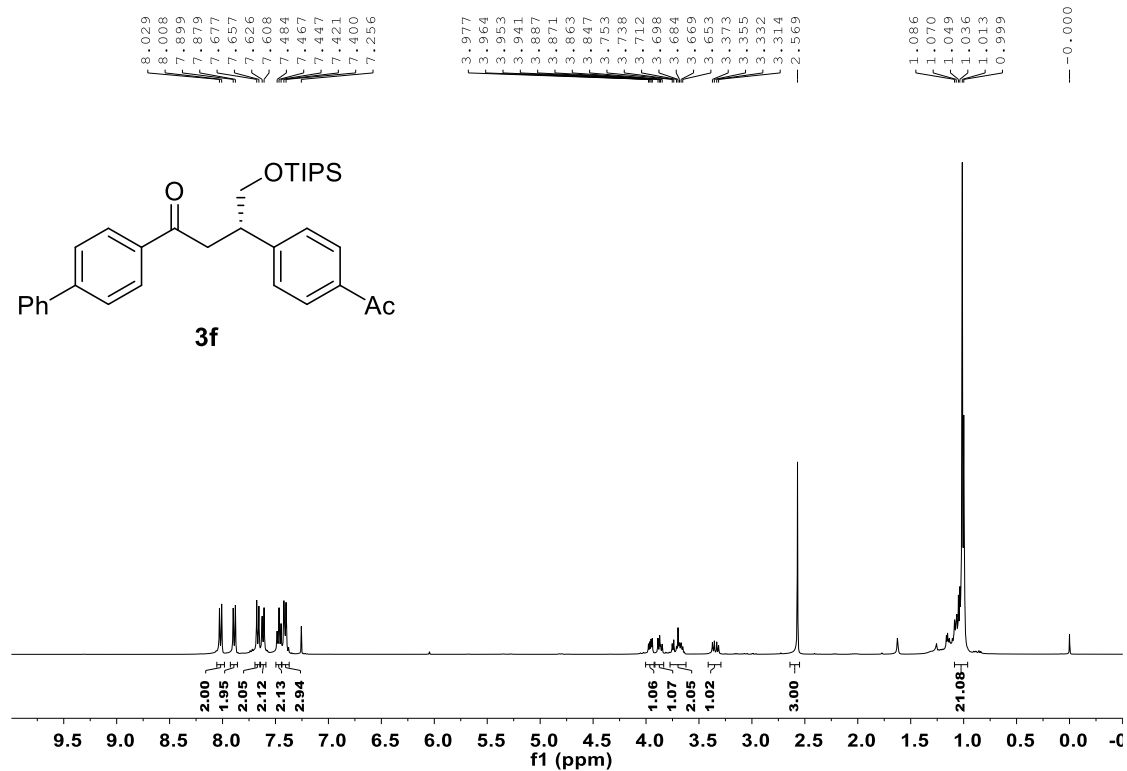

**3f** <sup>13</sup>C NMR (400M Hz, CDCl<sub>3</sub>)

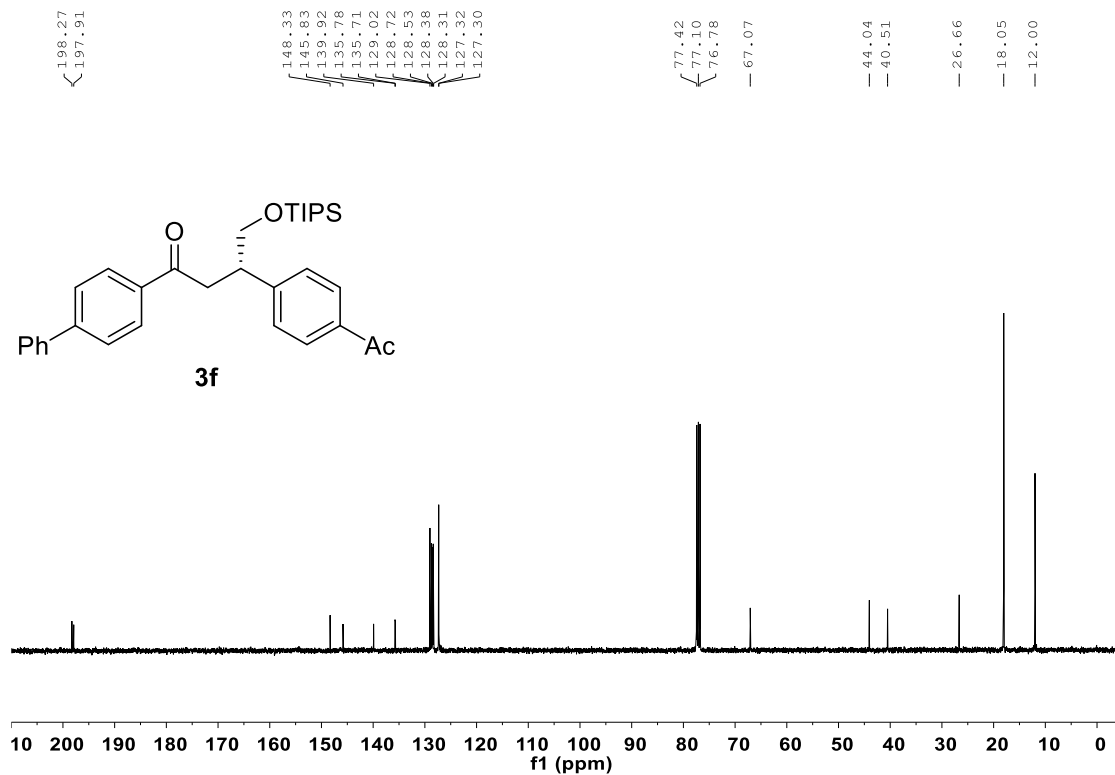

**3g**  $^1\text{H}$  NMR (400M Hz,  $\text{CDCl}_3$ )

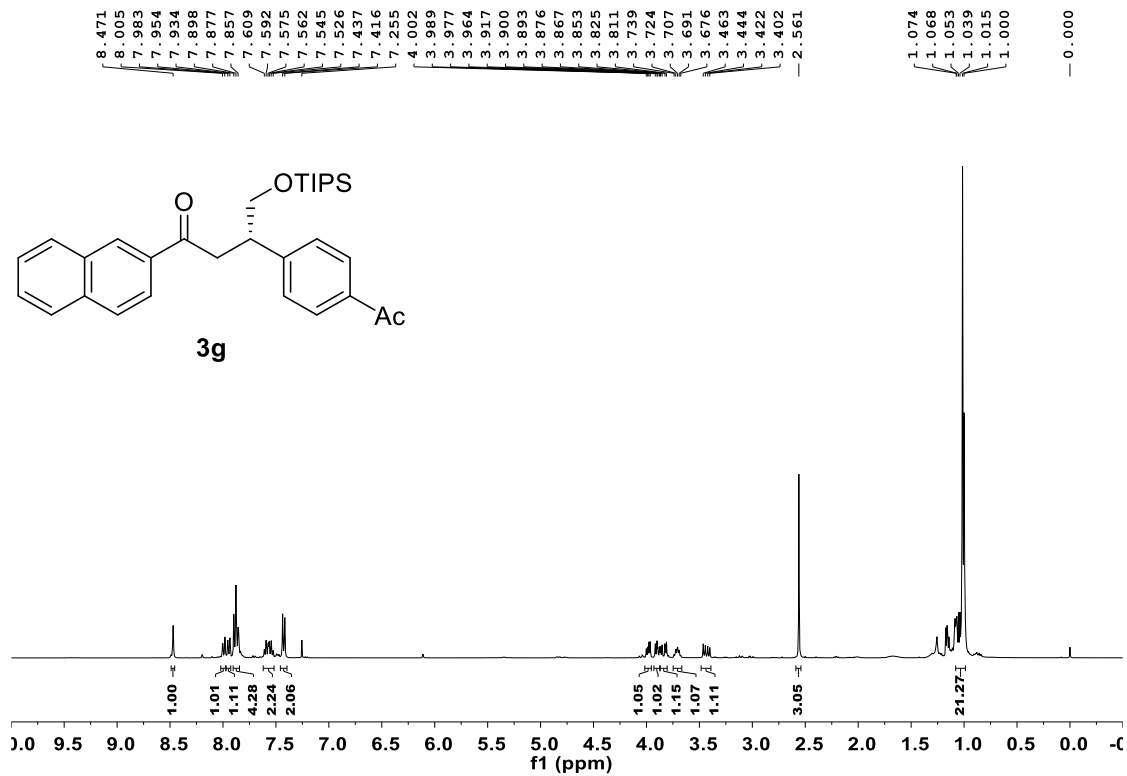

**3g**  $^{13}\text{C}$  NMR (400M Hz,  $\text{CDCl}_3$ )

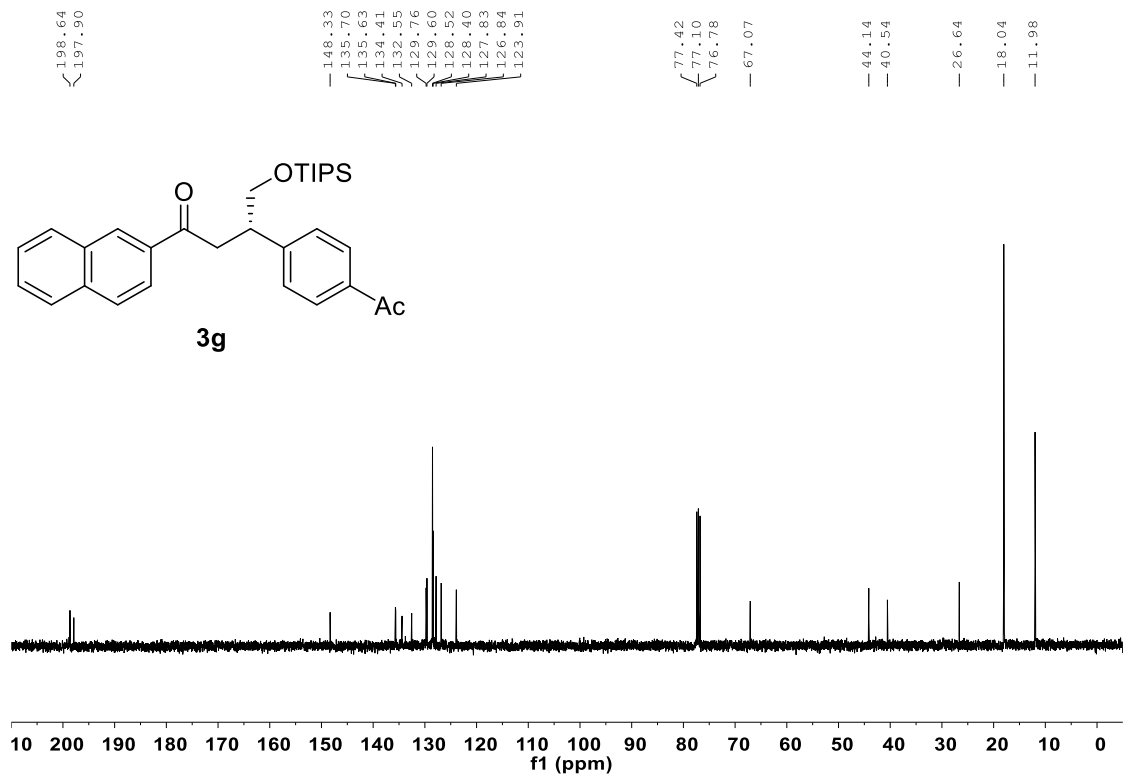

**3h** <sup>1</sup>H NMR (400M Hz, CDCl<sub>3</sub>)

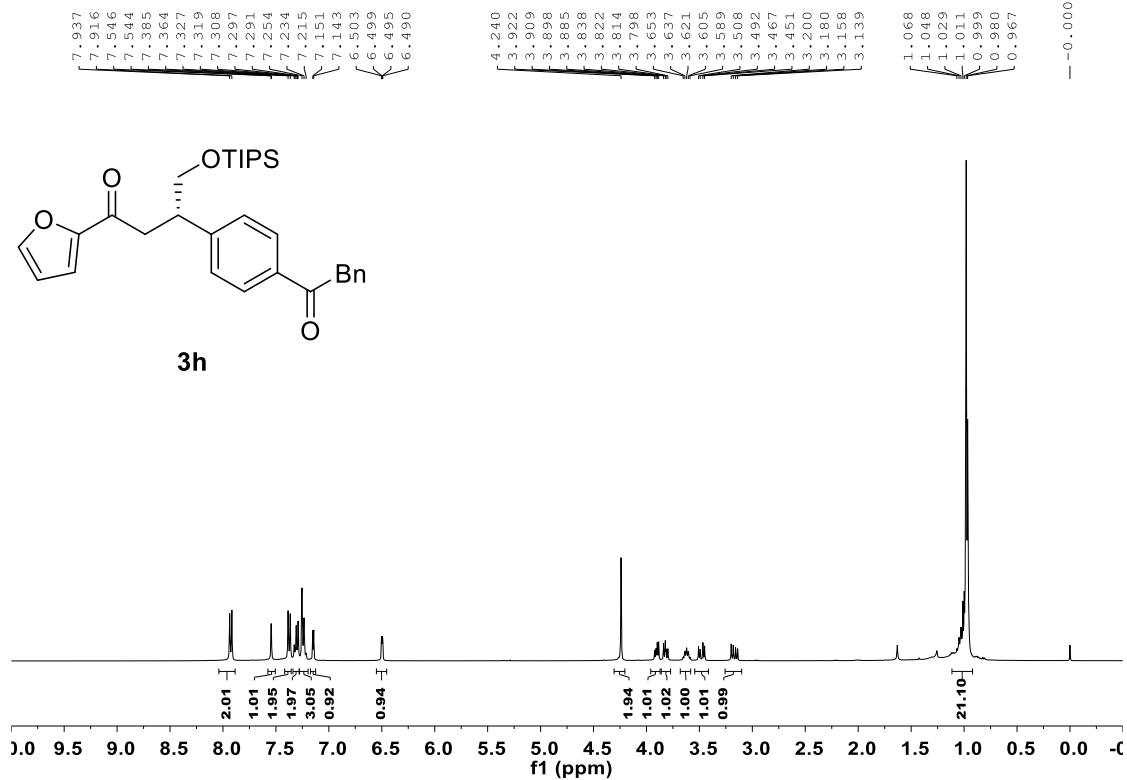

**3h** <sup>13</sup>C NMR (400M Hz, CDCl<sub>3</sub>)

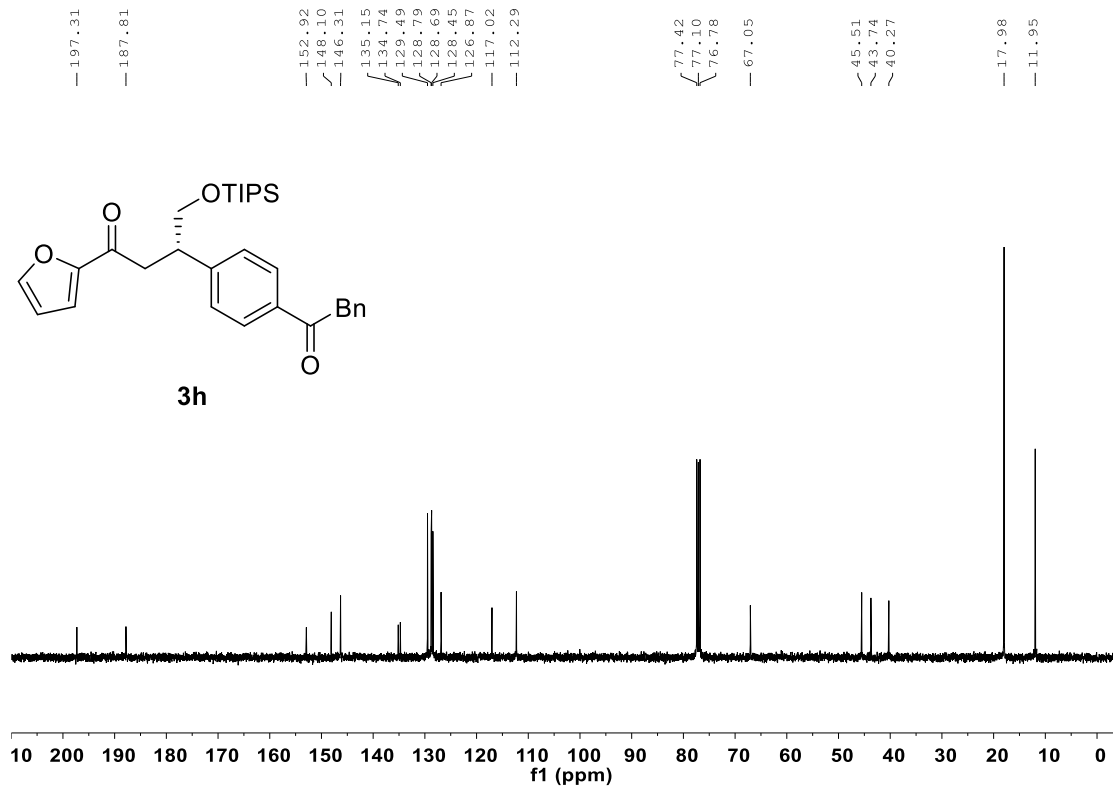

**3i** <sup>1</sup>H NMR (400M Hz, CDCl<sub>3</sub>)

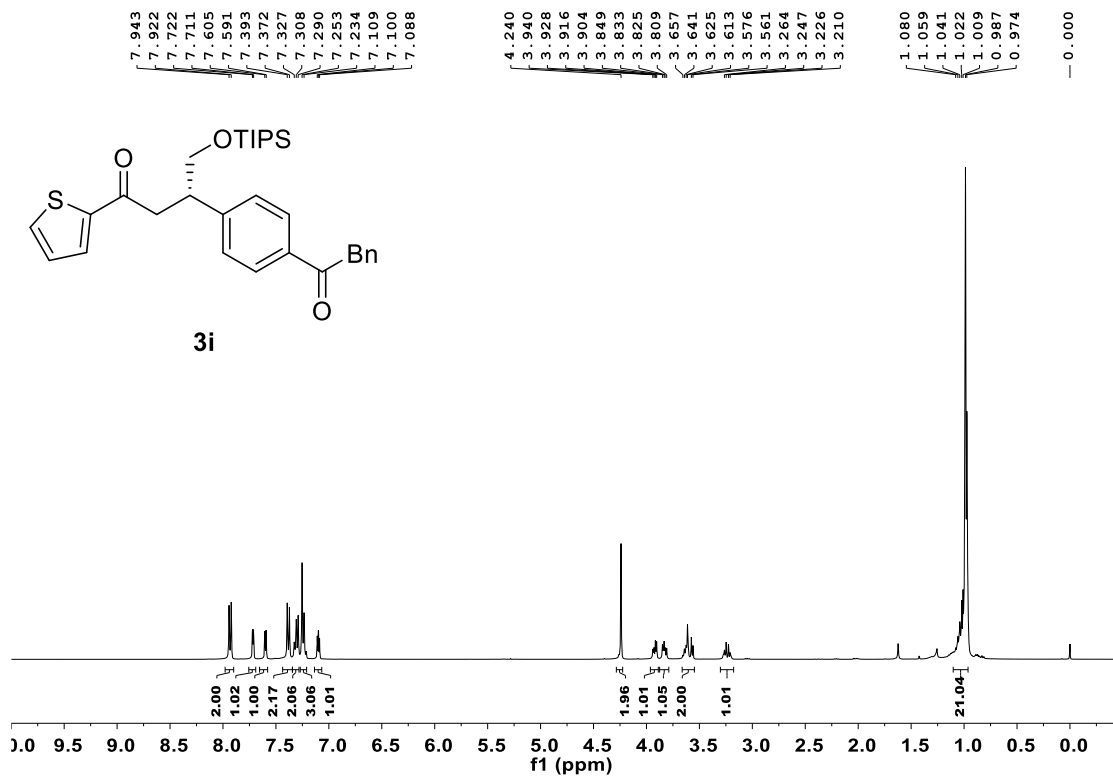

**3i** <sup>13</sup>C NMR (400M Hz, CDCl<sub>3</sub>)

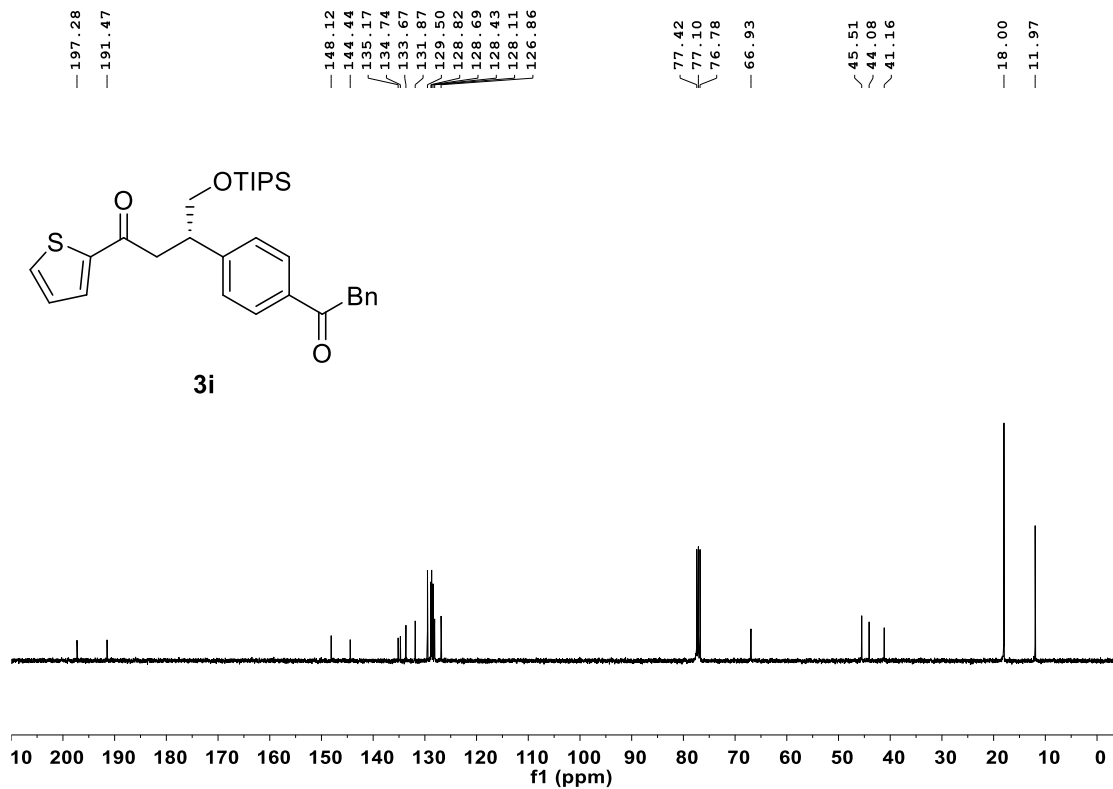

**3j** <sup>1</sup>H NMR (400M Hz, CDCl<sub>3</sub>)

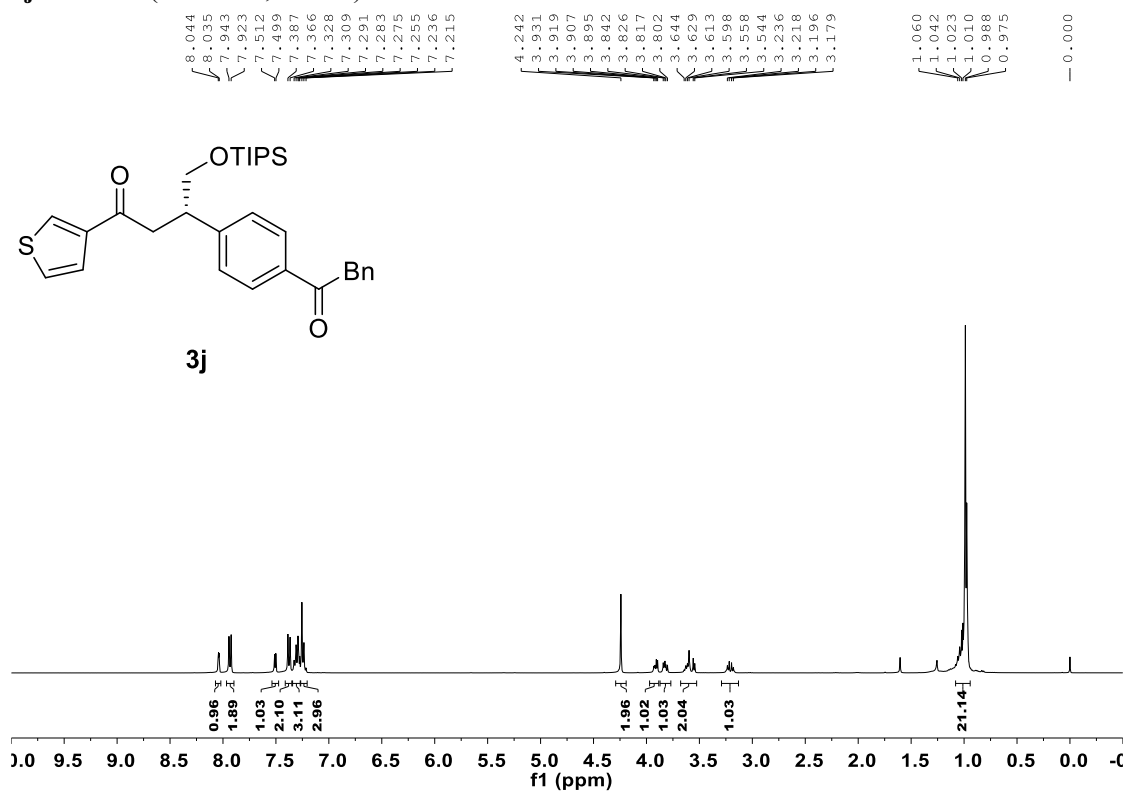

**3j** <sup>13</sup>C NMR (400M Hz, CDCl<sub>3</sub>)

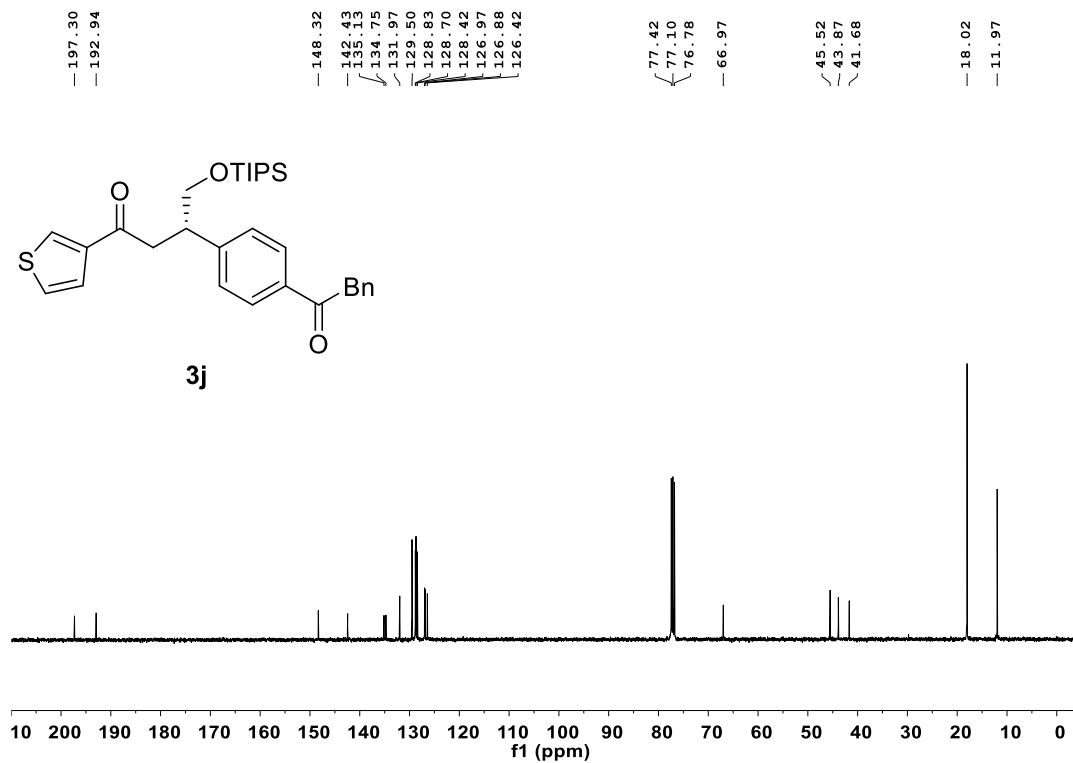

**3k**  $^1\text{H}$  NMR (400M Hz,  $\text{CDCl}_3$ )

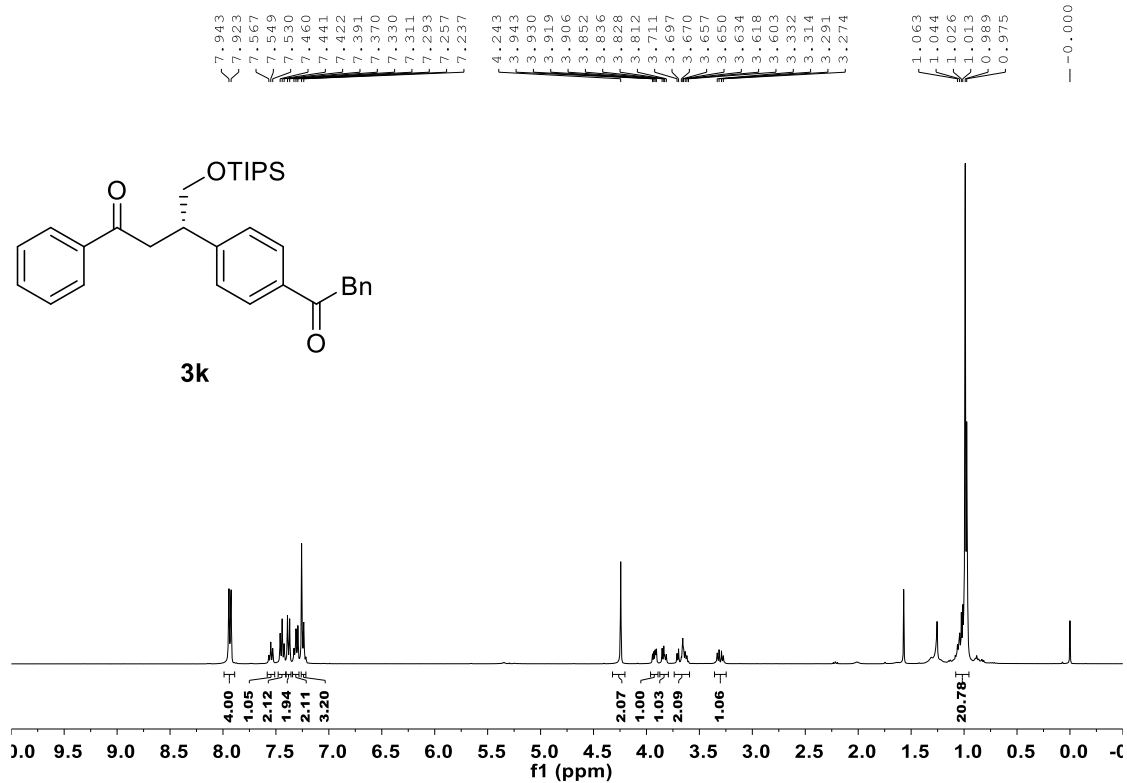

**3k**  $^{13}\text{C}$  NMR (400M Hz,  $\text{CDCl}_3$ )

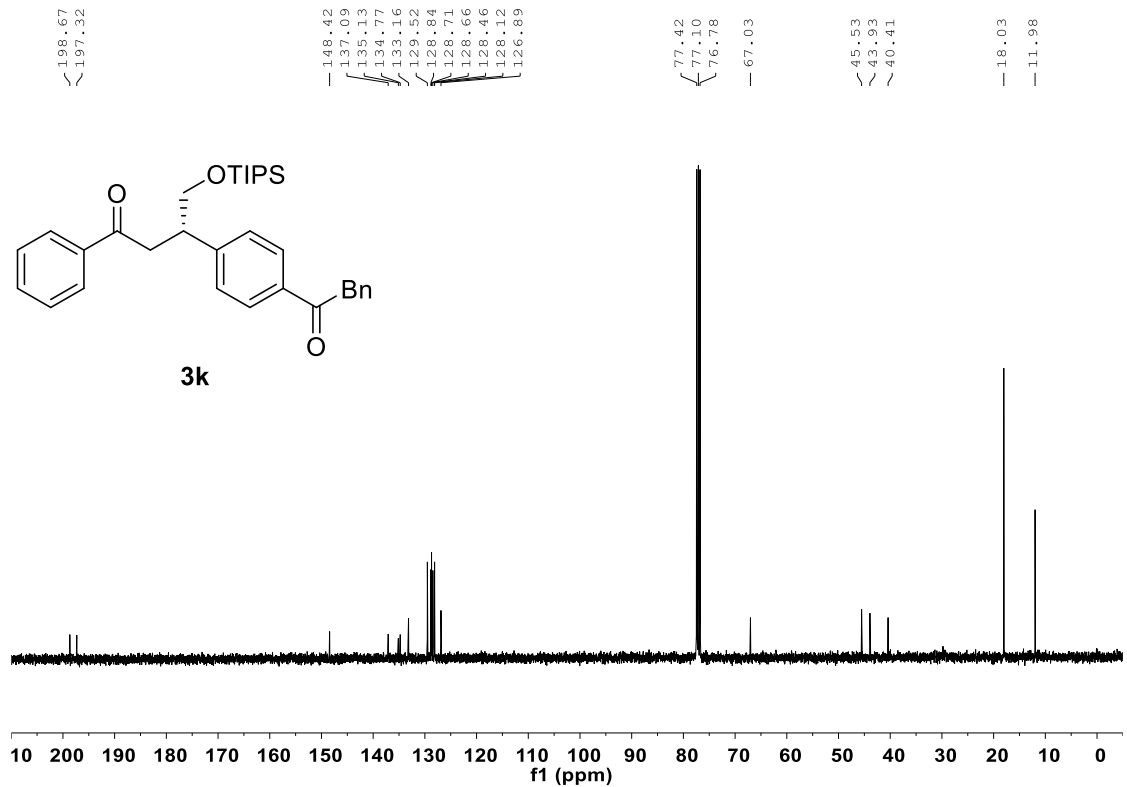



**3I** <sup>1</sup>H NMR (400M Hz, CDCl<sub>3</sub>)

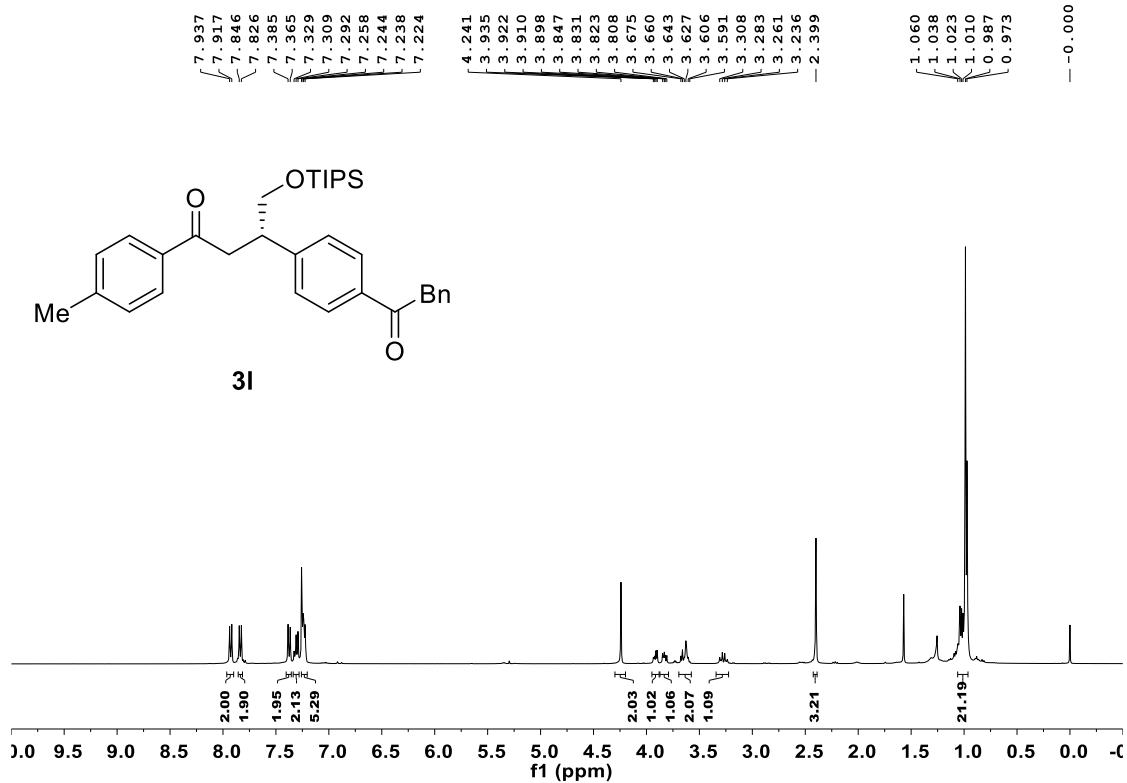

**3I** <sup>13</sup>C NMR (400M Hz, CDCl<sub>3</sub>)

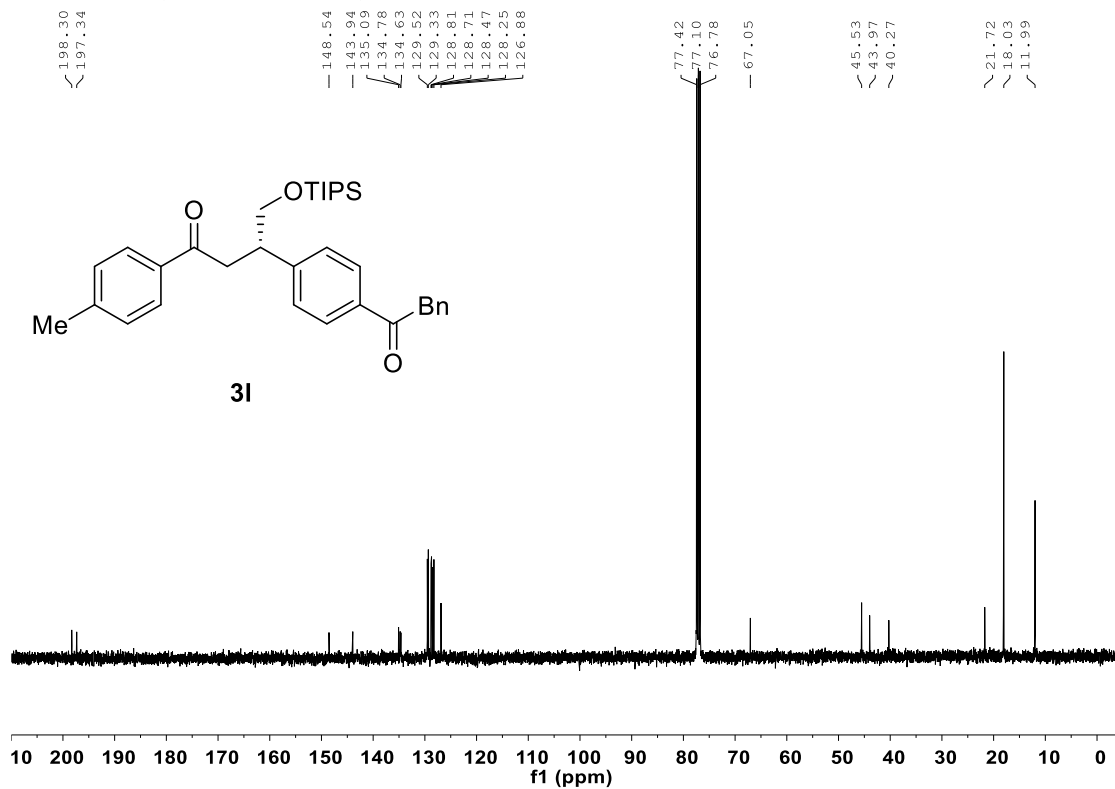

**3m**  $^1\text{H}$  NMR (400M Hz,  $\text{CDCl}_3$ )

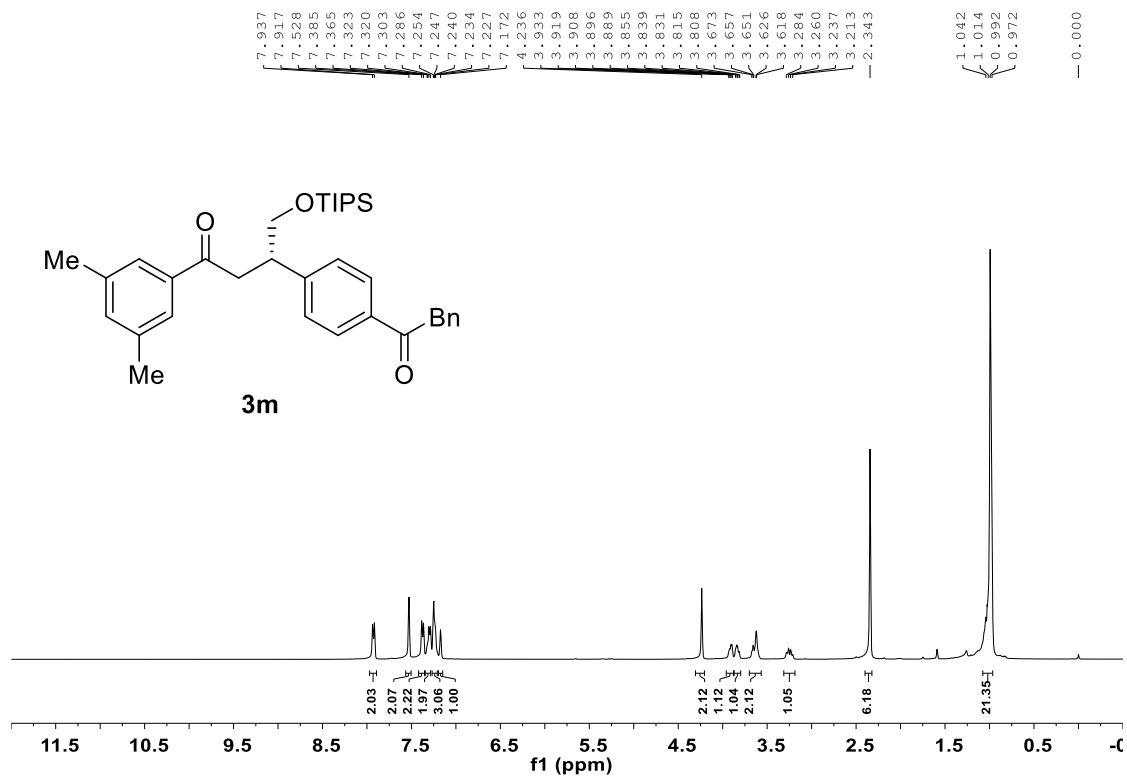

**3m**  $^{13}\text{C}$  NMR (400M Hz,  $\text{CDCl}_3$ )

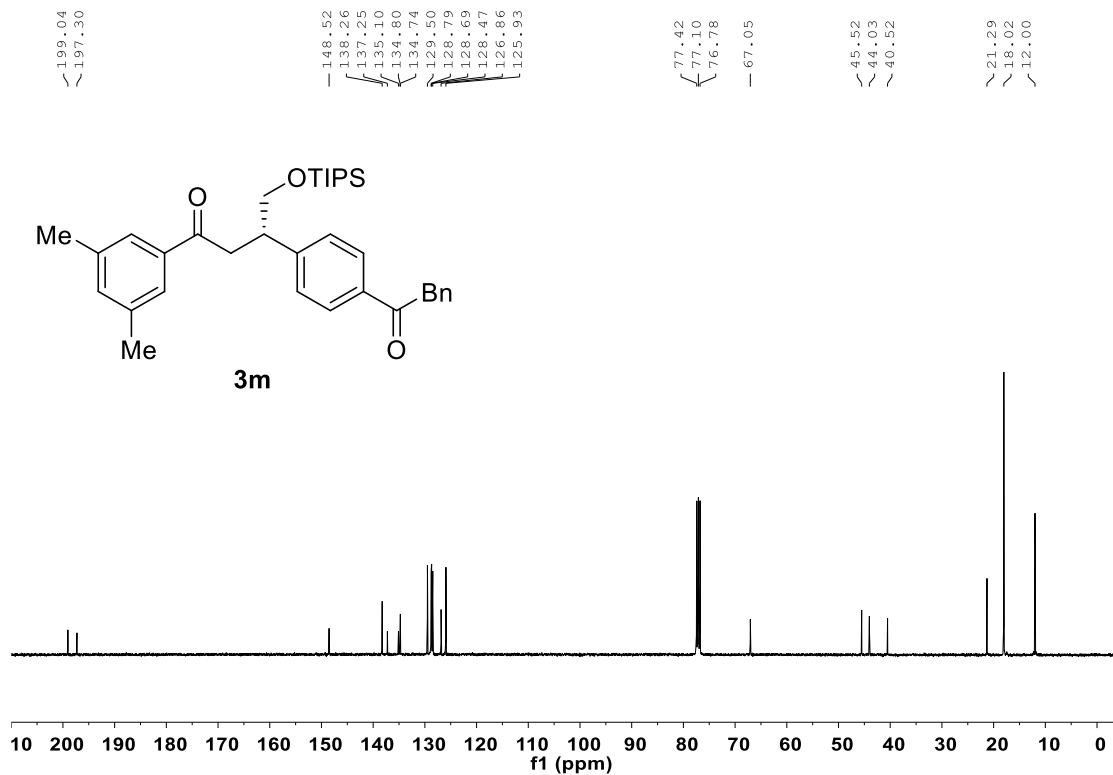

**3n** <sup>1</sup>H NMR (400M Hz, CDCl<sub>3</sub>)

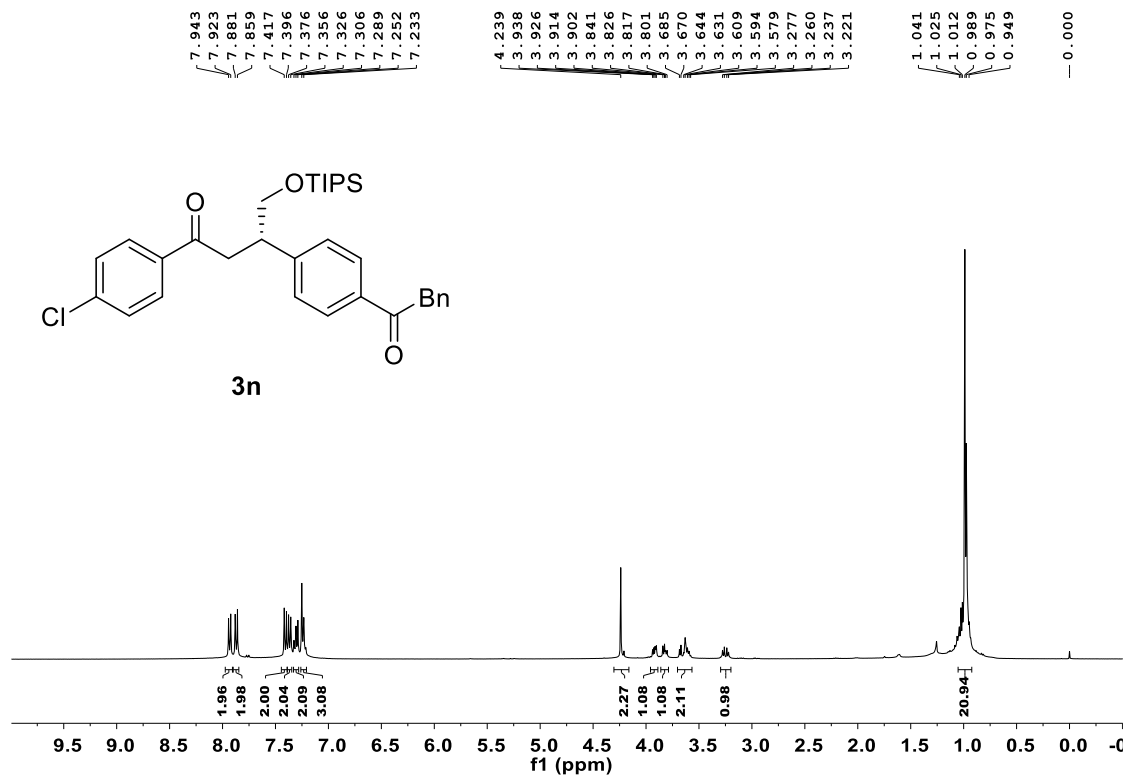

**3n** <sup>13</sup>C NMR (400M Hz, CDCl<sub>3</sub>)

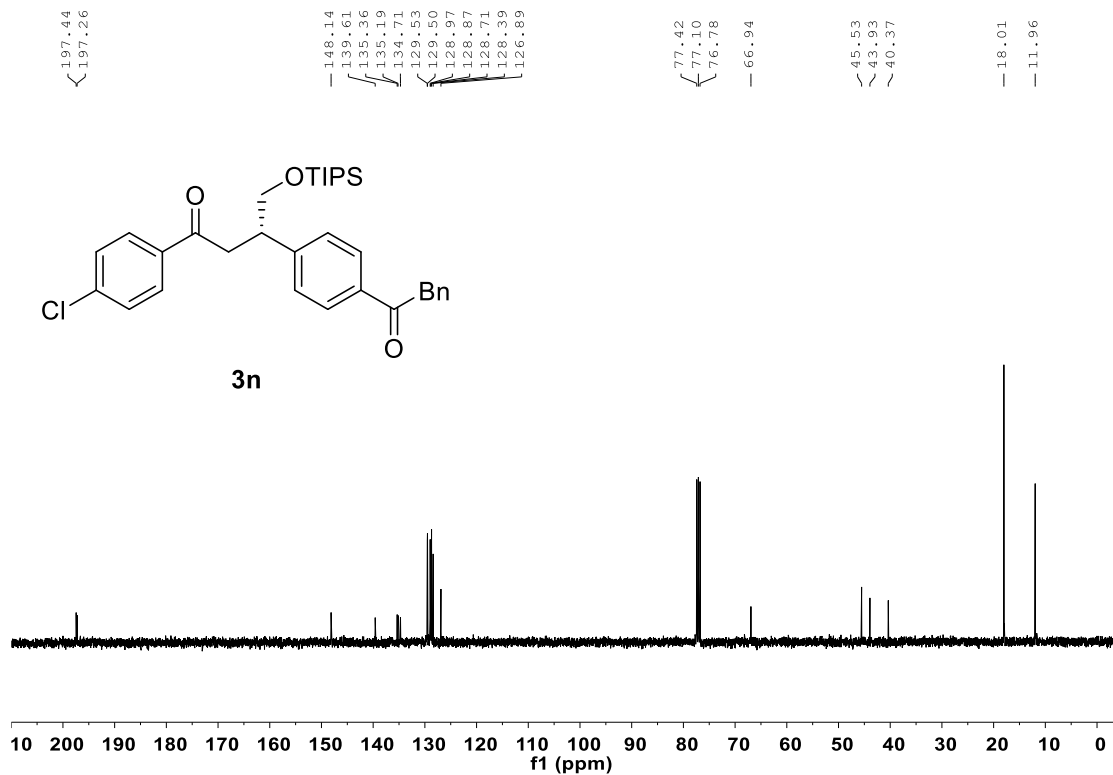

**3o** <sup>1</sup>H NMR (400M Hz, CDCl<sub>3</sub>)

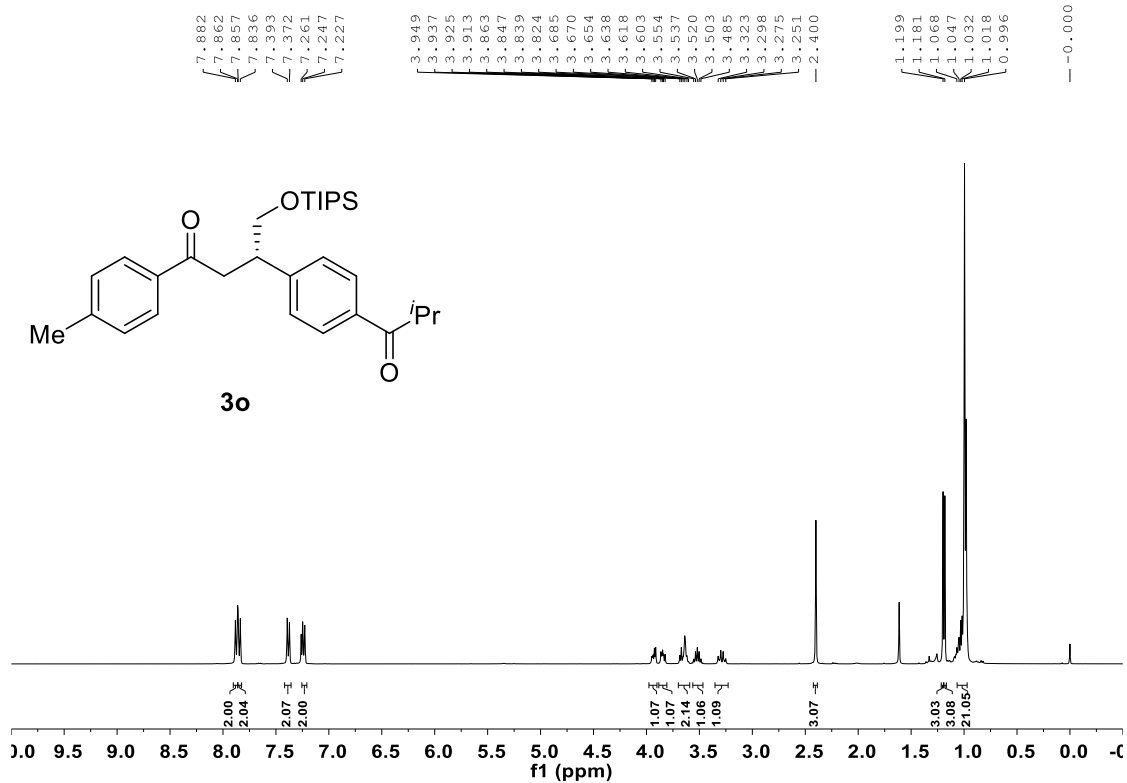

**3o** <sup>13</sup>C NMR (400M Hz, CDCl<sub>3</sub>)

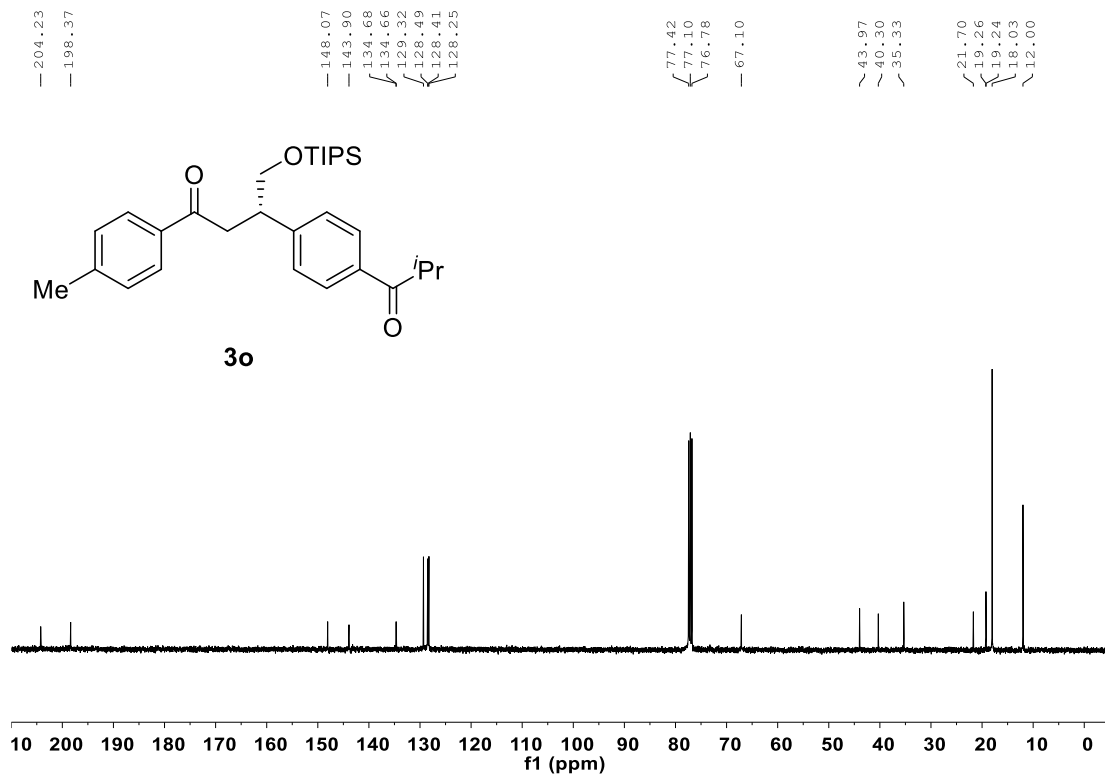

**3p**  $^1\text{H}$  NMR (400M Hz,  $\text{CDCl}_3$ )

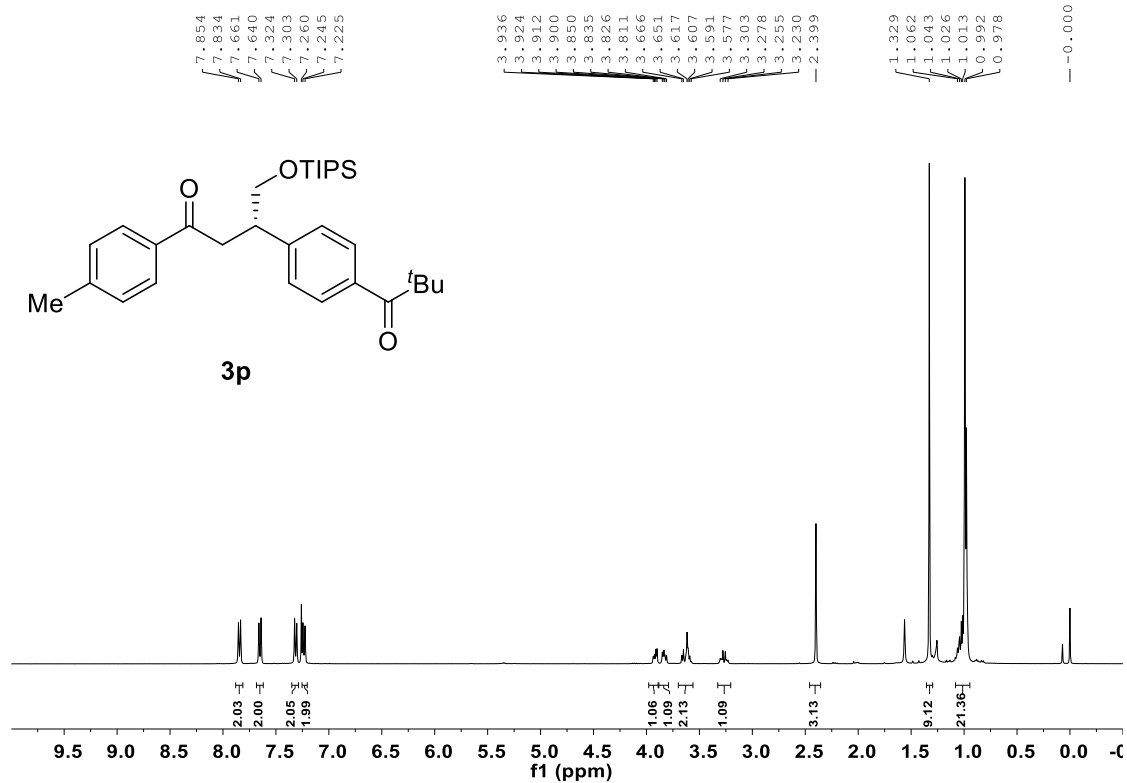

**3p**  $^{13}\text{C}$  NMR (400M Hz,  $\text{CDCl}_3$ )

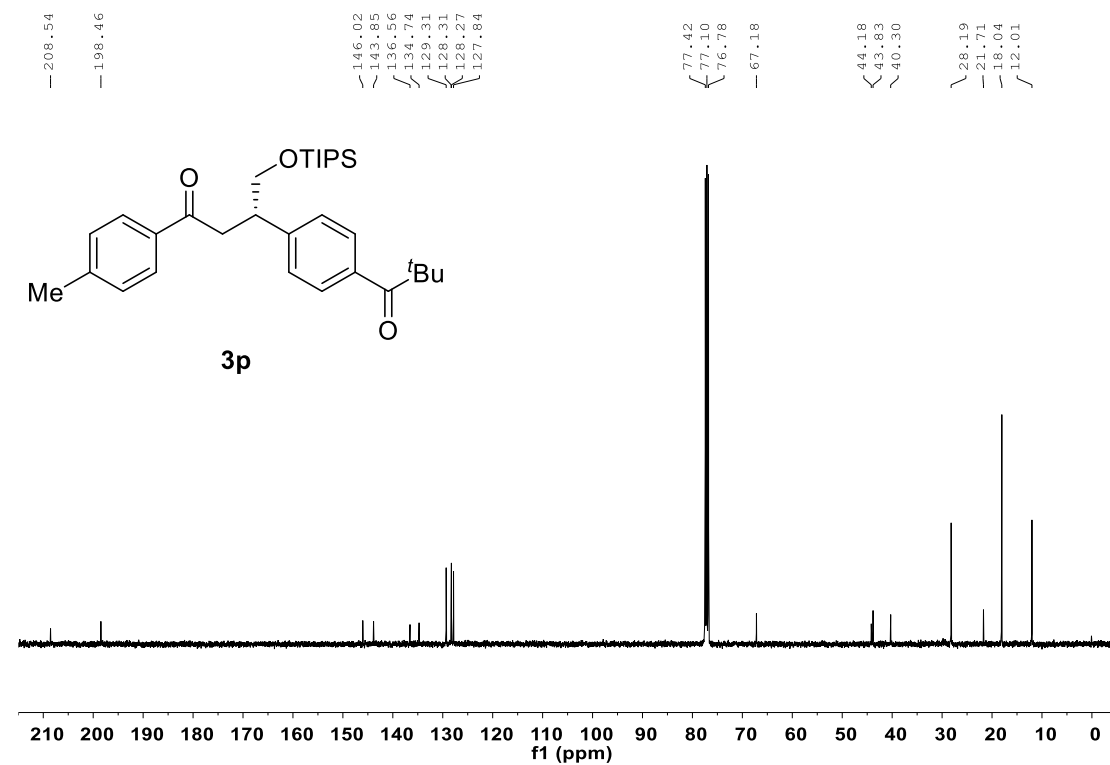

**3q**  $^1\text{H}$  NMR (400M Hz,  $\text{CDCl}_3$ )

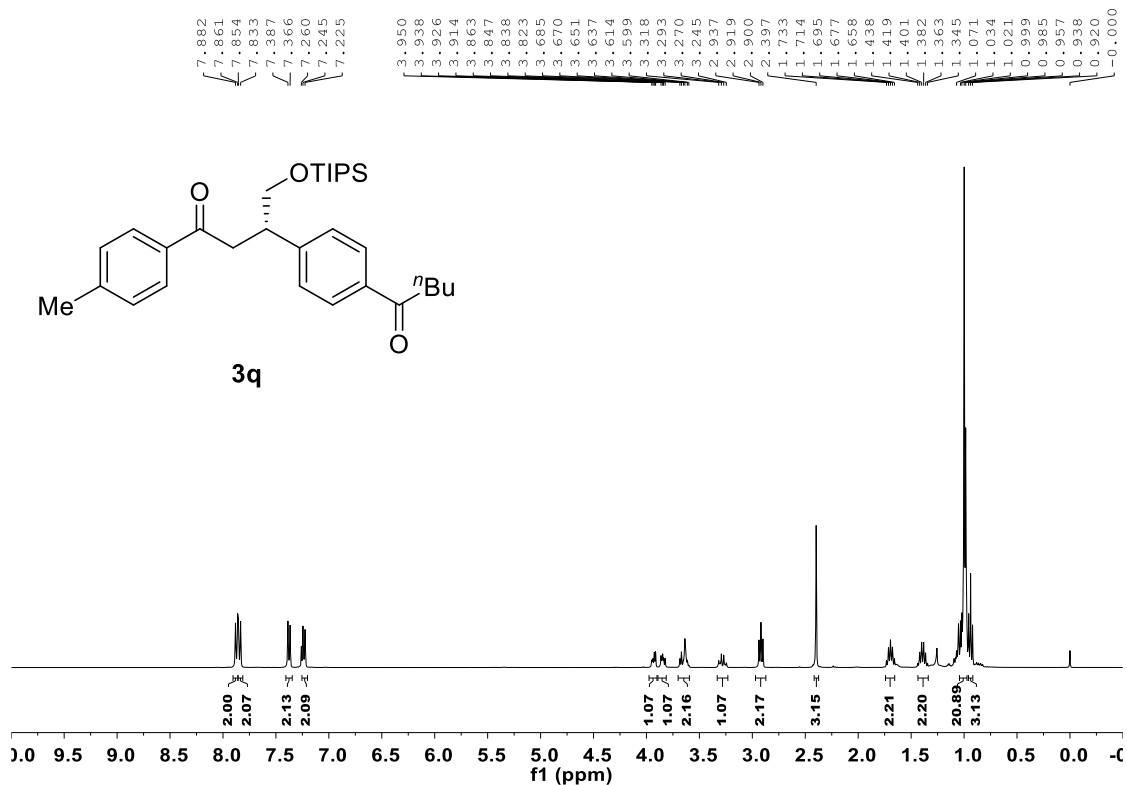

**3q**  $^{13}\text{C}$  NMR (400M Hz,  $\text{CDCl}_3$ )

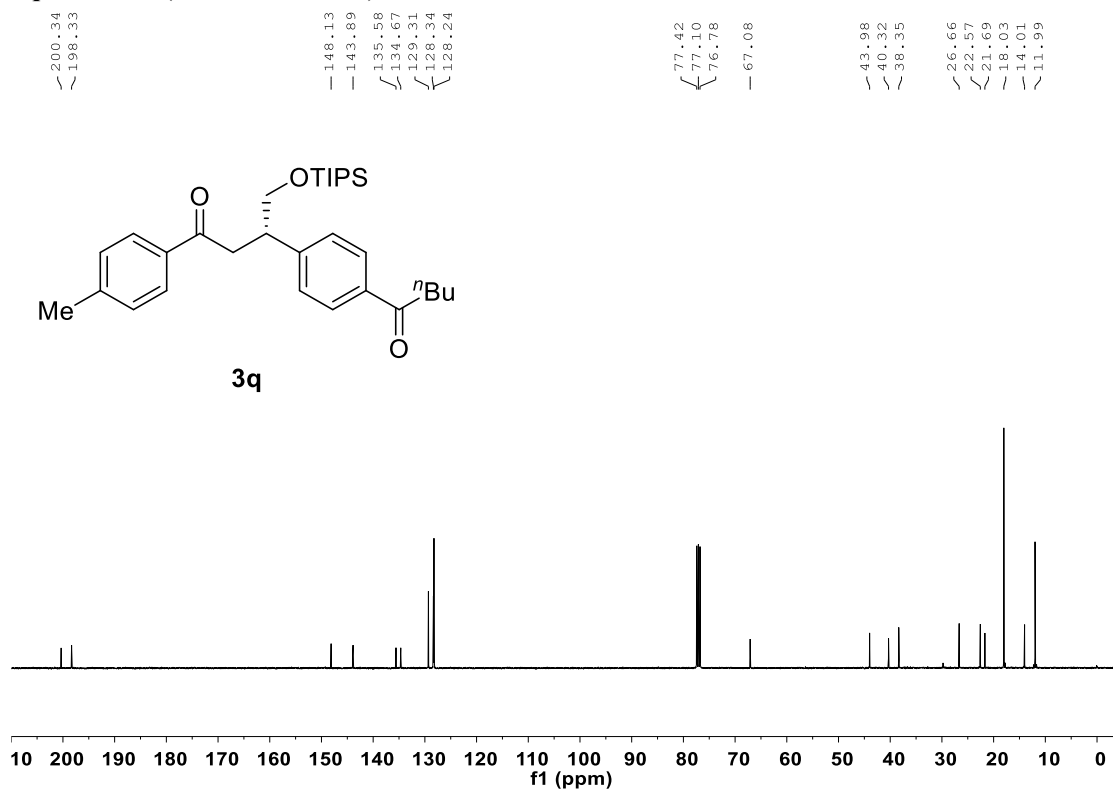

**3r** <sup>1</sup>H NMR (400M Hz, CDCl<sub>3</sub>)

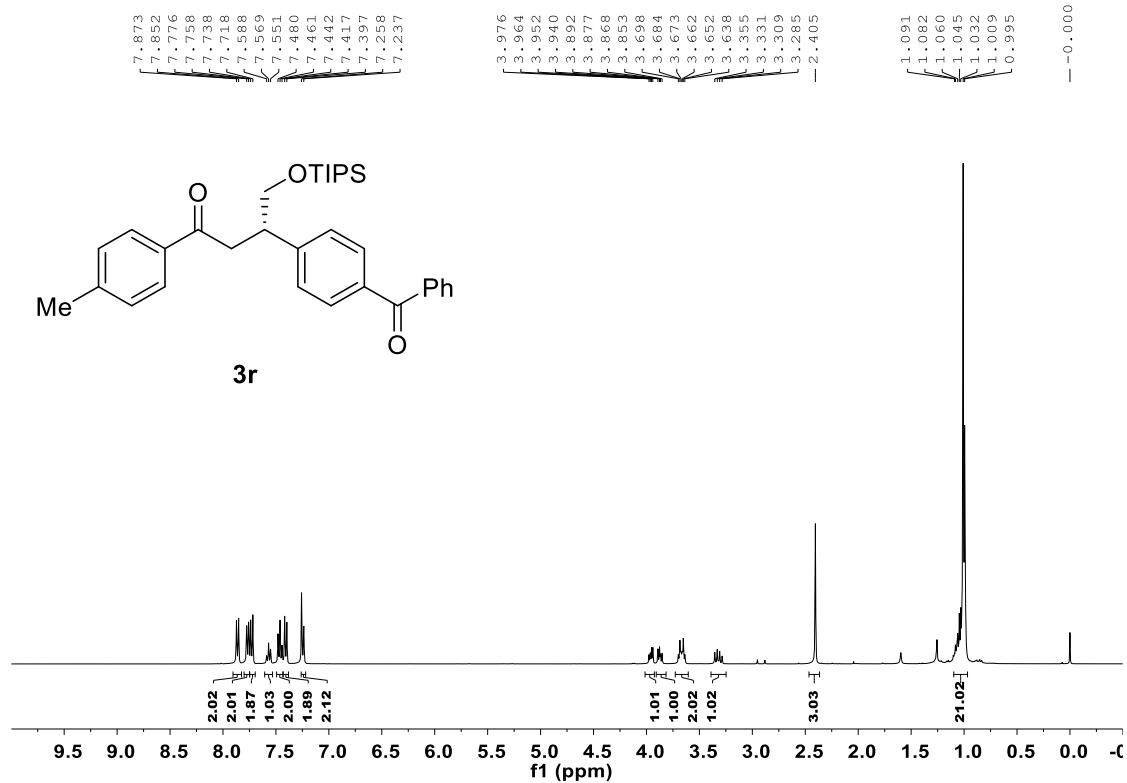

**3r** <sup>13</sup>C NMR (400M Hz, CDCl<sub>3</sub>)

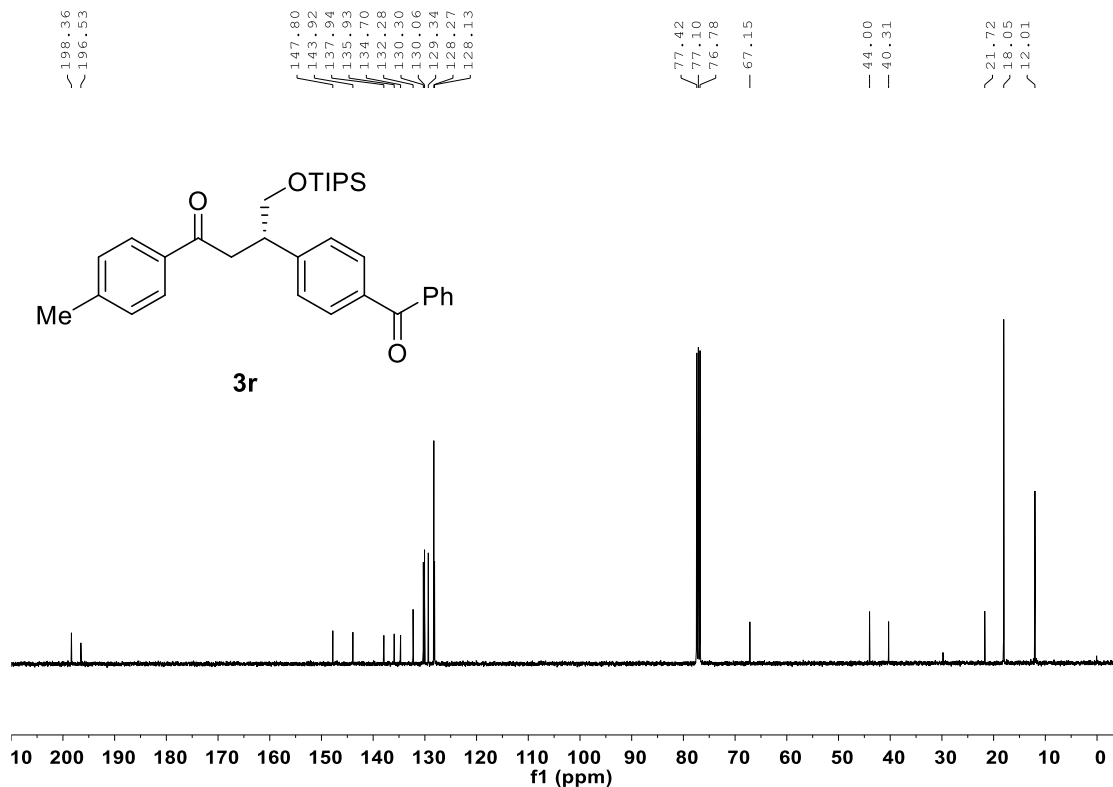

**3s** <sup>1</sup>H NMR (400M Hz, CDCl<sub>3</sub>)

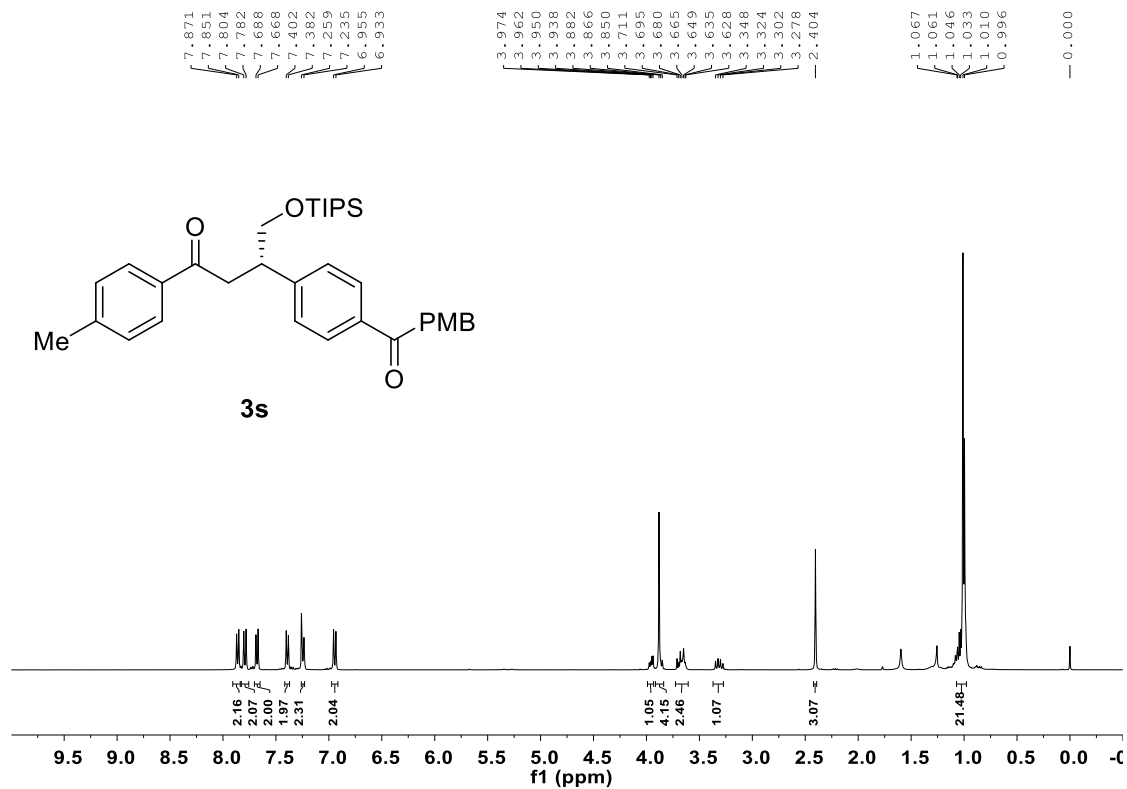

**3s** <sup>13</sup>C NMR (400M Hz, CDCl<sub>3</sub>)

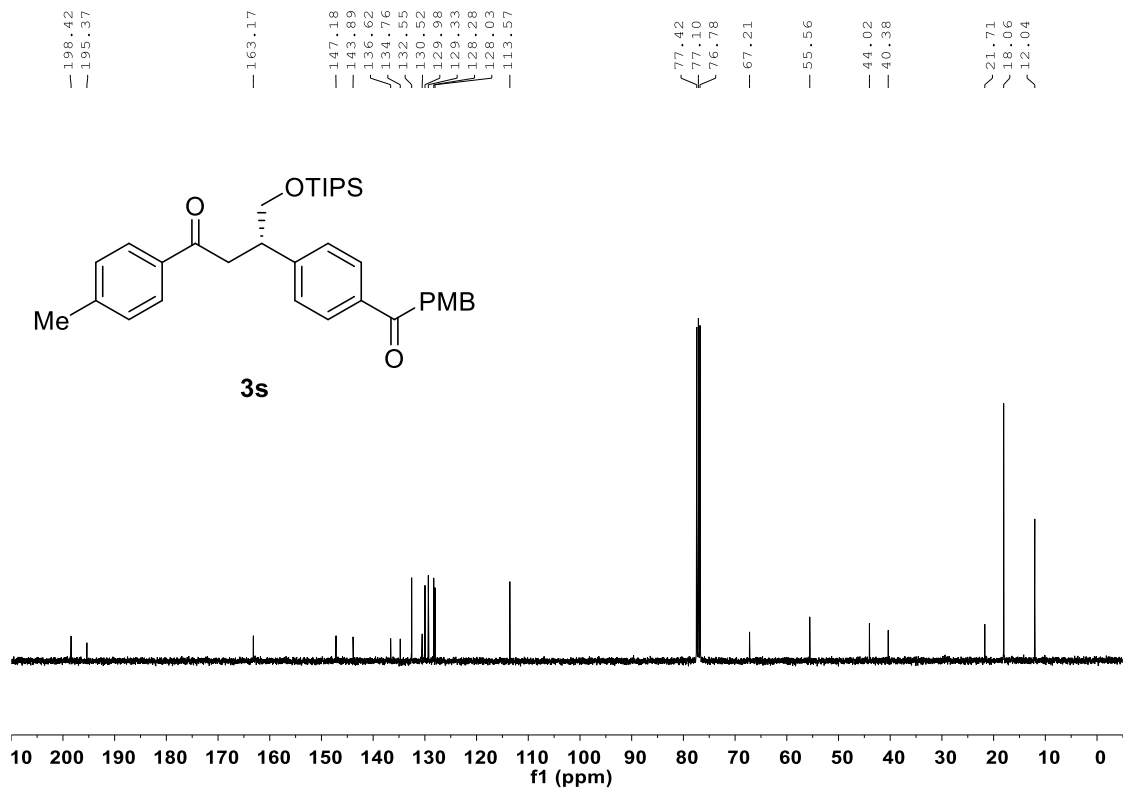



**3t** <sup>1</sup>H NMR (400M Hz, CDCl<sub>3</sub>)

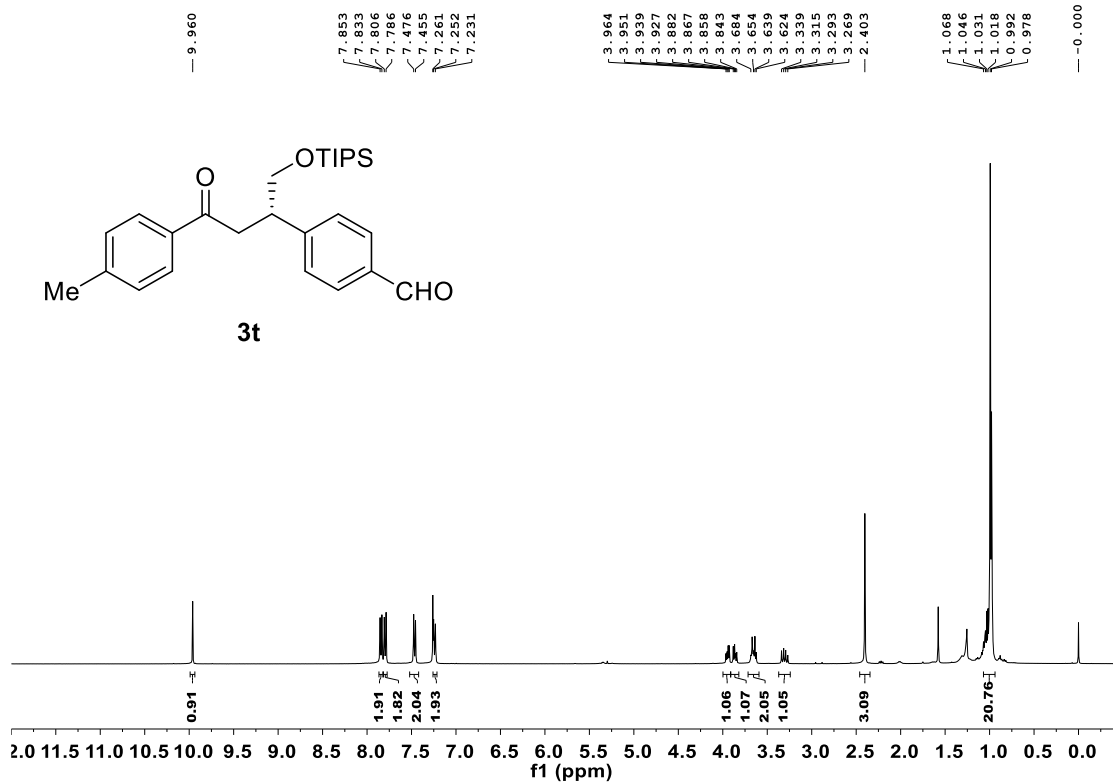

**3t** <sup>13</sup>C NMR (400M Hz, CDCl<sub>3</sub>)

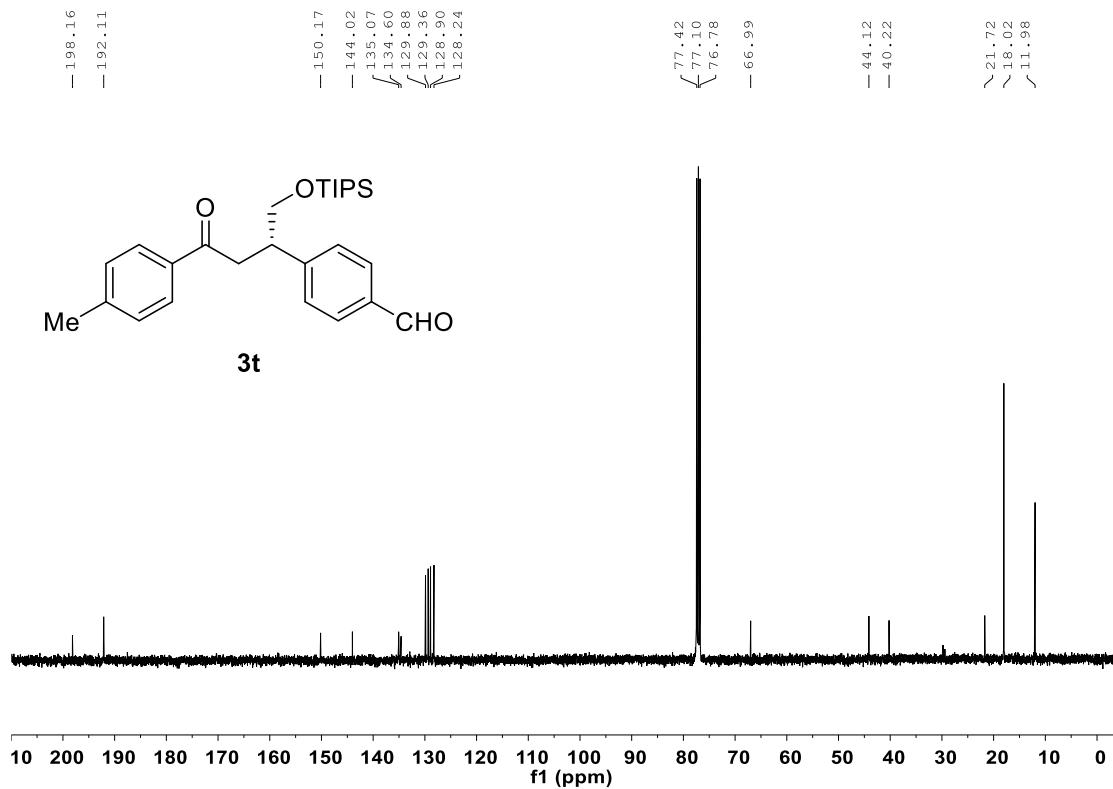

**3u** <sup>1</sup>H NMR (400M Hz, CDCl<sub>3</sub>)

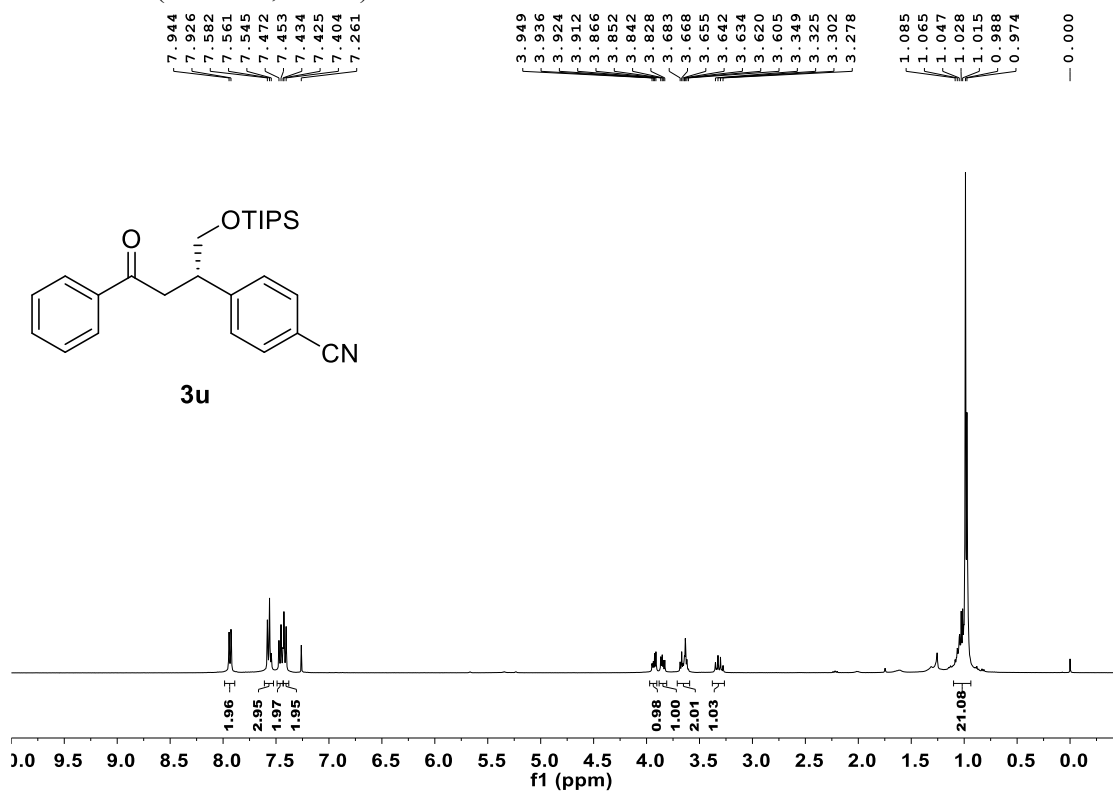

**3u** <sup>13</sup>C NMR (400M Hz, CDCl<sub>3</sub>)

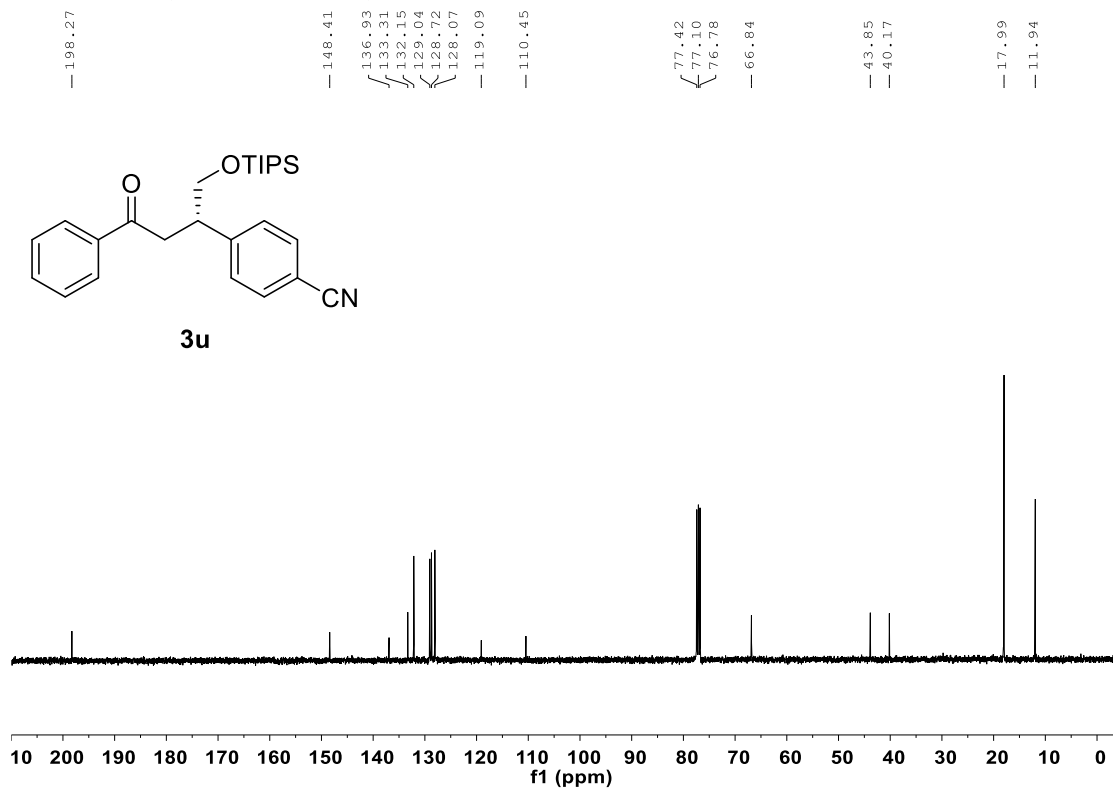

**3v** <sup>1</sup>H NMR (400M Hz, CDCl<sub>3</sub>)

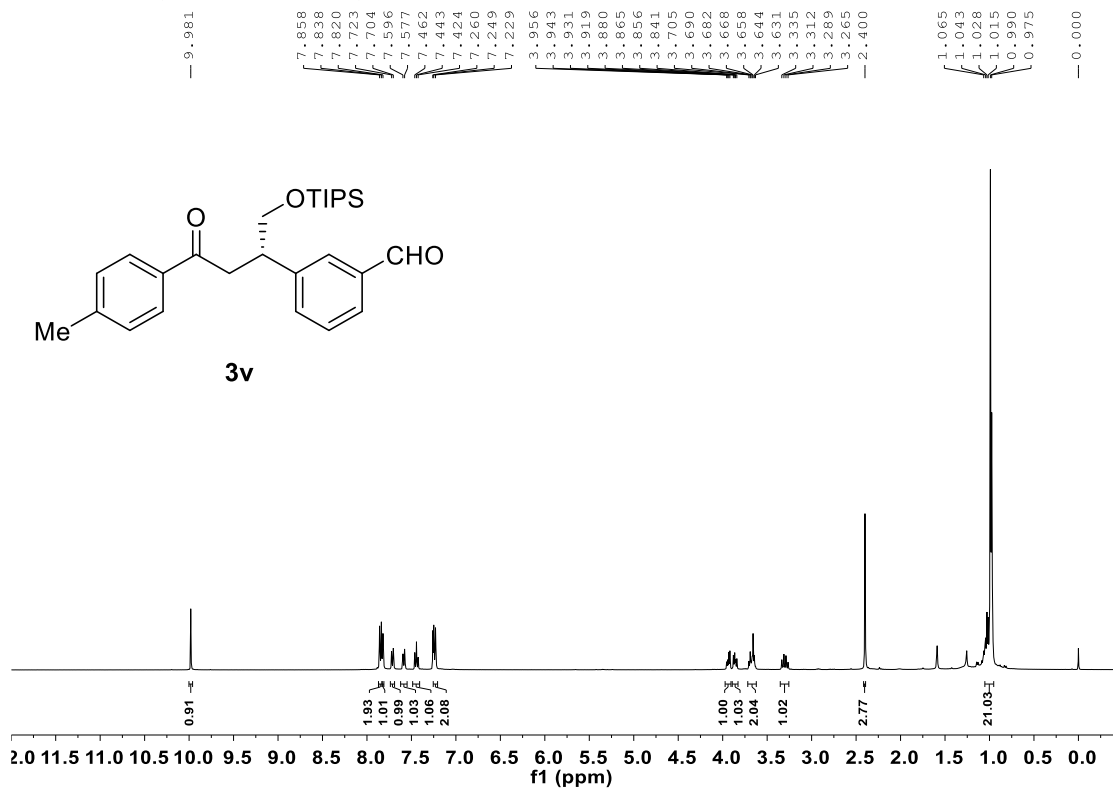

**3v** <sup>13</sup>C NMR (400M Hz, CDCl<sub>3</sub>)

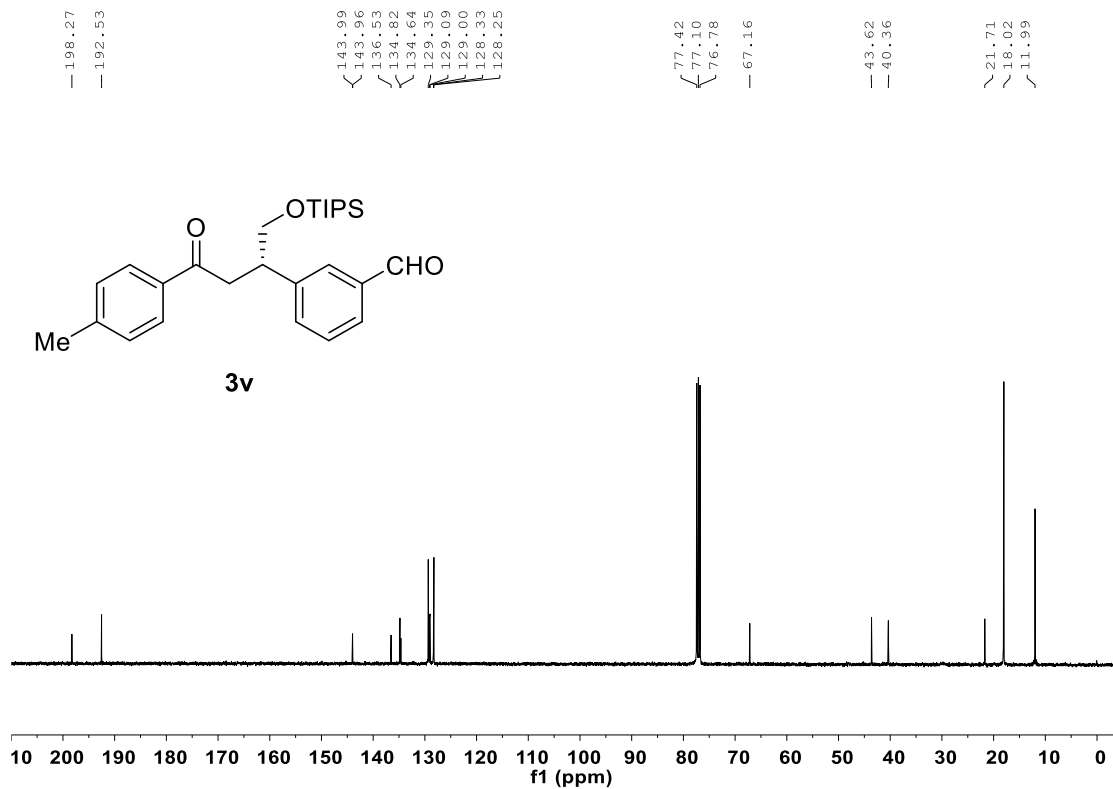

**3w**  $^1\text{H}$  NMR (400M Hz,  $\text{CDCl}_3$ )

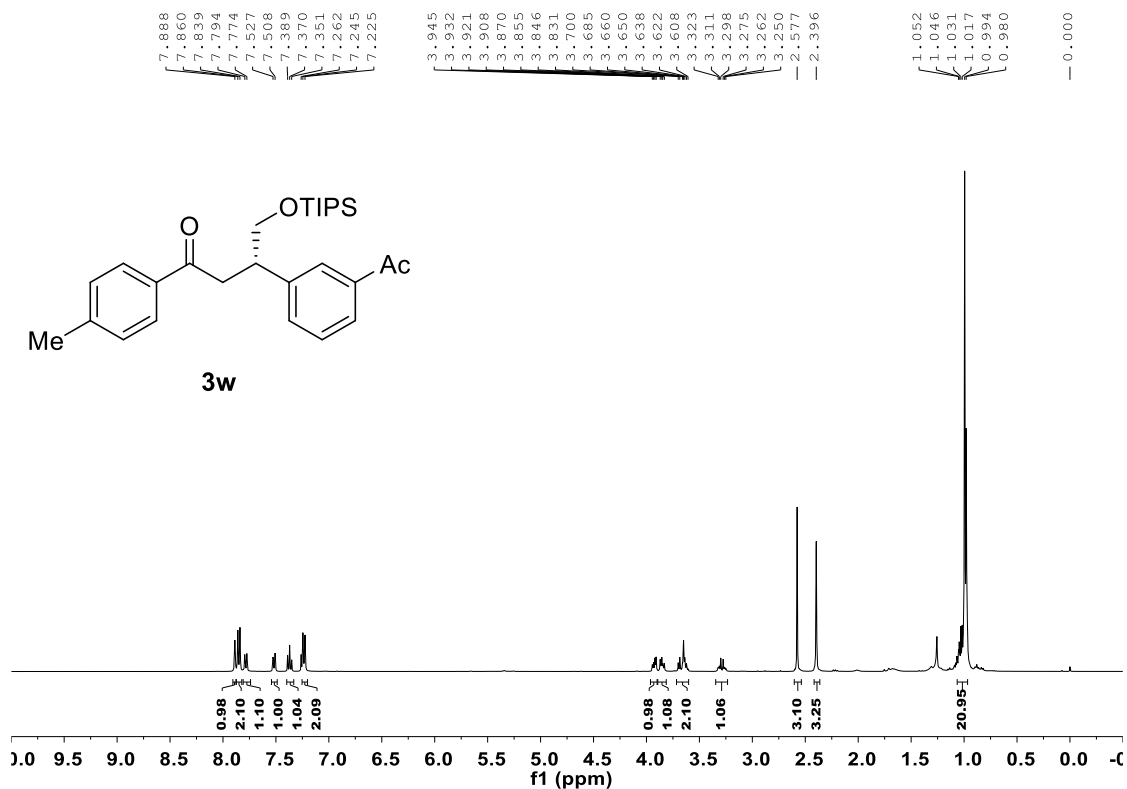

**3w**  $^{13}\text{C}$  NMR (400M Hz,  $\text{CDCl}_3$ )

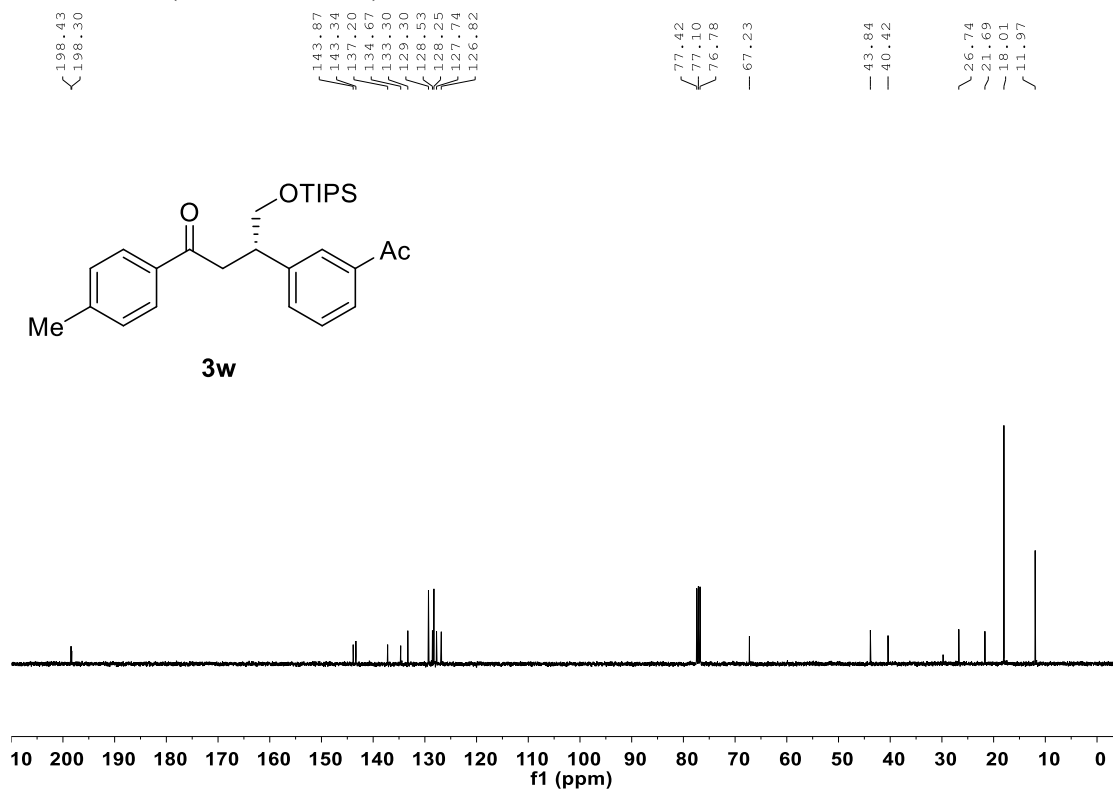

**3x** <sup>1</sup>H NMR (400M Hz, CDCl<sub>3</sub>)

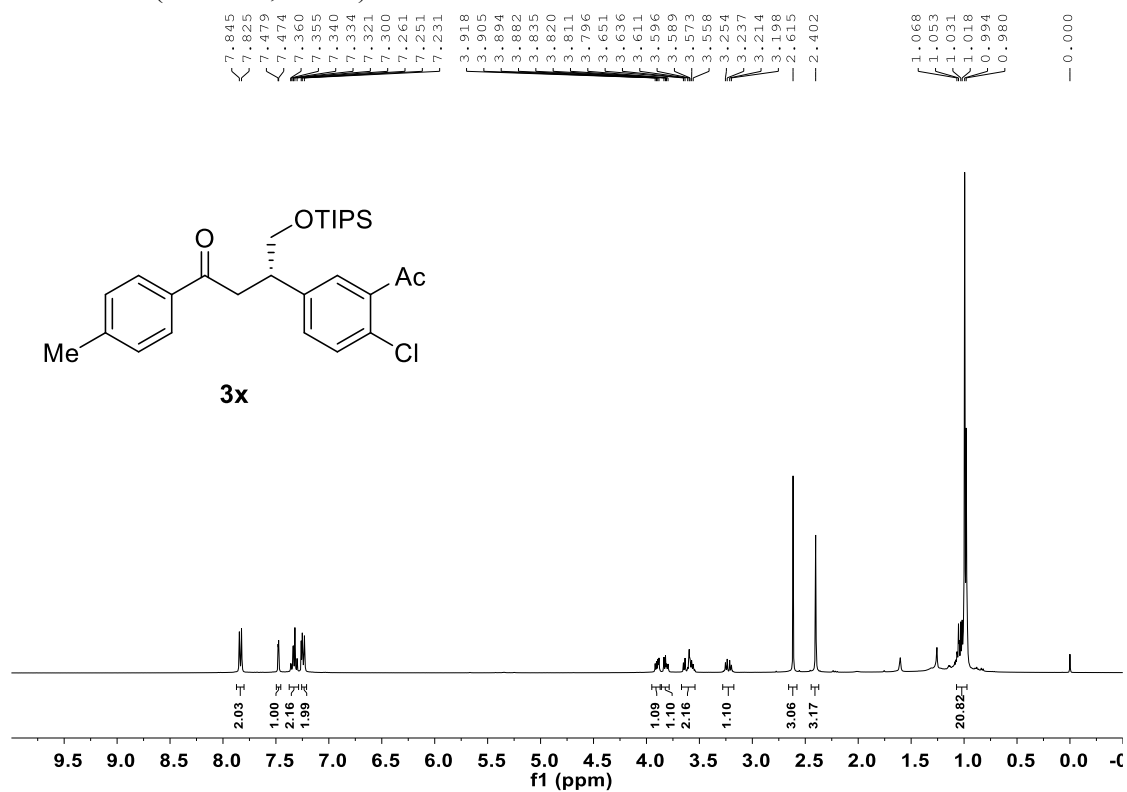

**3x** <sup>13</sup>C NMR (400M Hz, CDCl<sub>3</sub>)

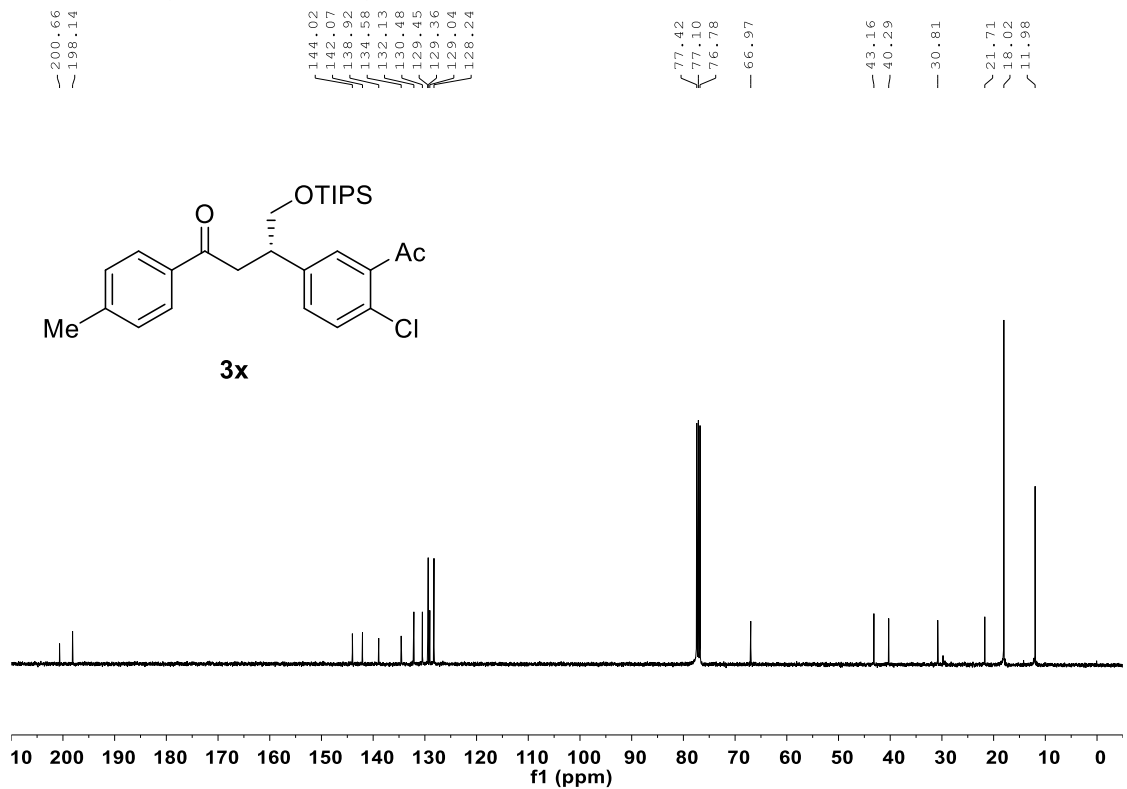

**3y** <sup>1</sup>H NMR (400M Hz, CDCl<sub>3</sub>)

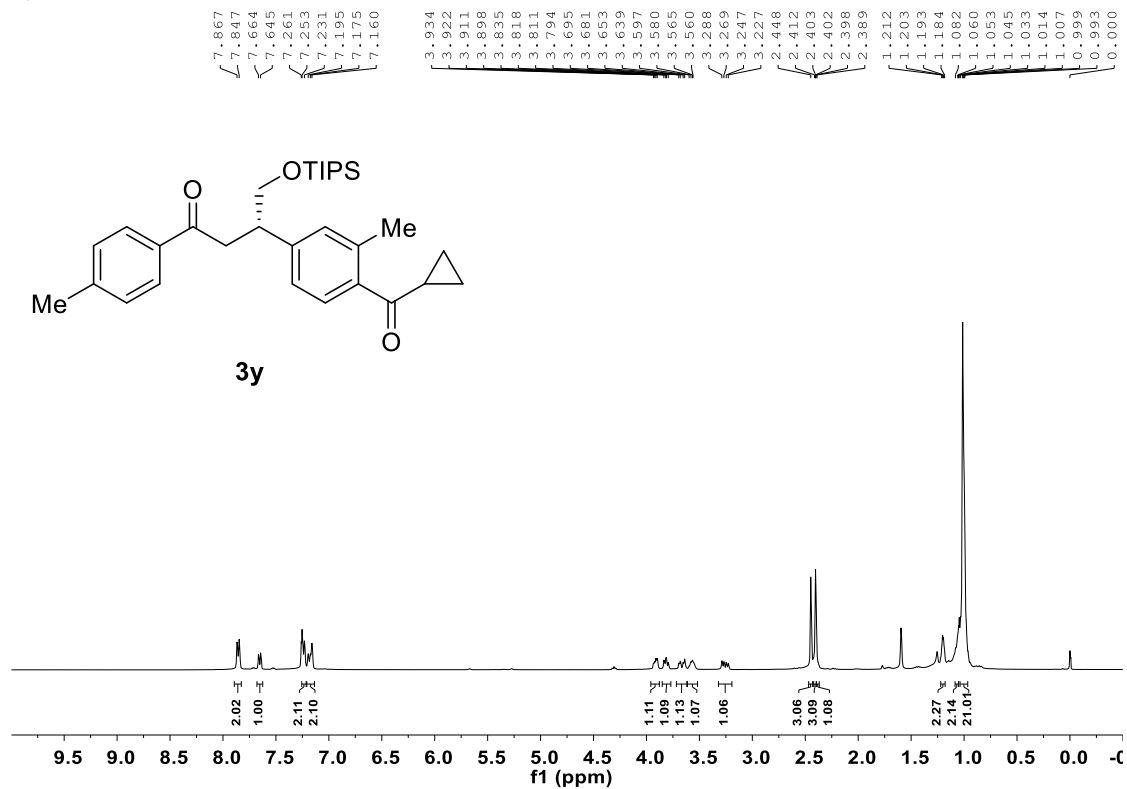

**3y** <sup>13</sup>C NMR (400M Hz, CDCl<sub>3</sub>)

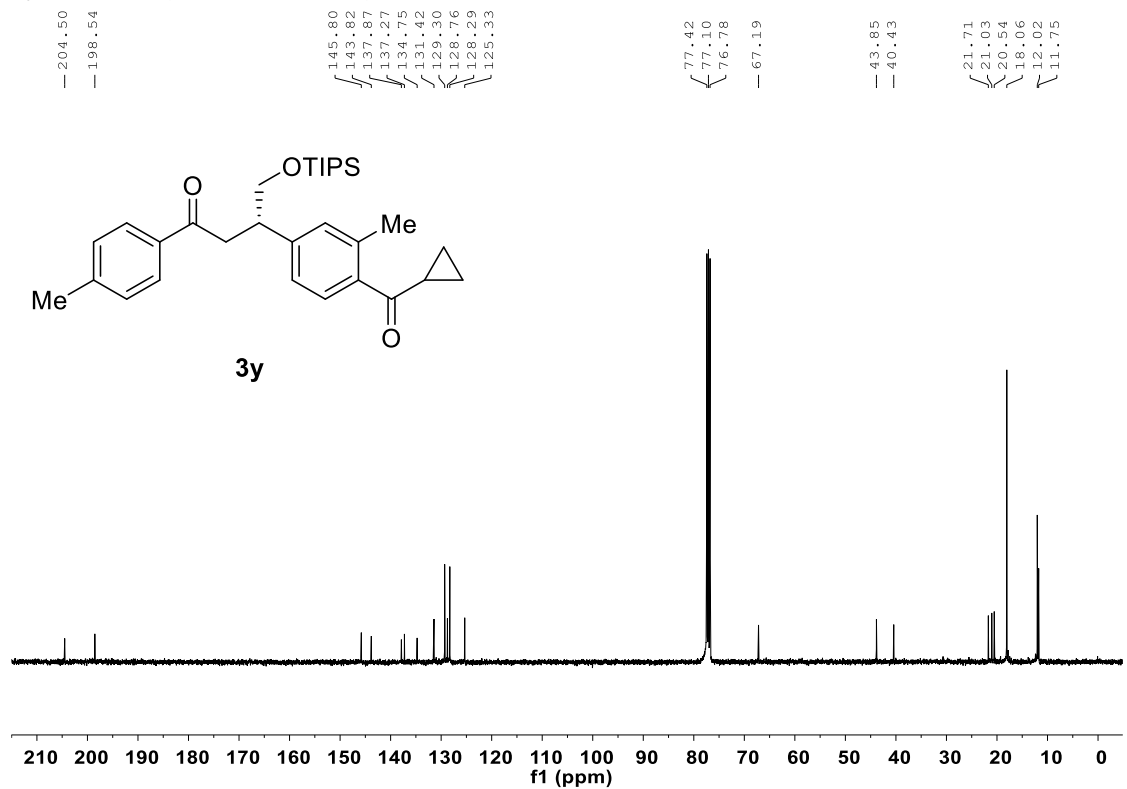

**3z** <sup>1</sup>H NMR (400M Hz, CDCl<sub>3</sub>)

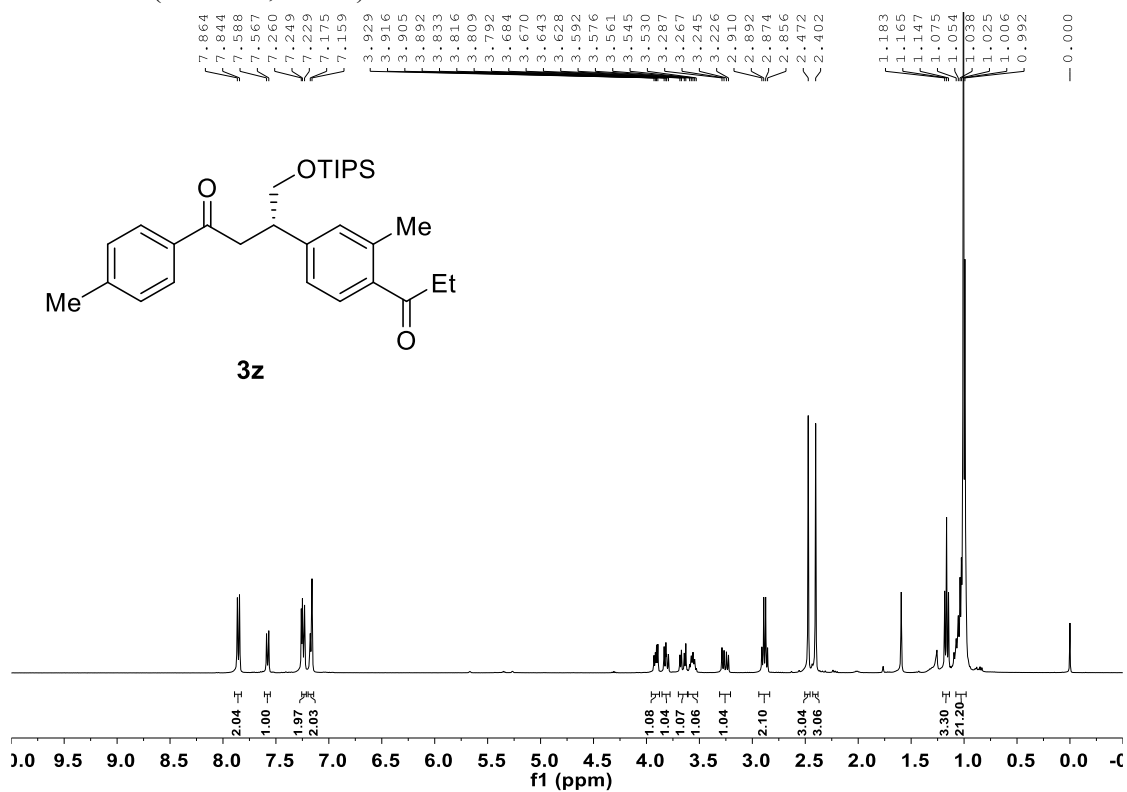

**3z** <sup>13</sup>C NMR (400M Hz, CDCl<sub>3</sub>)

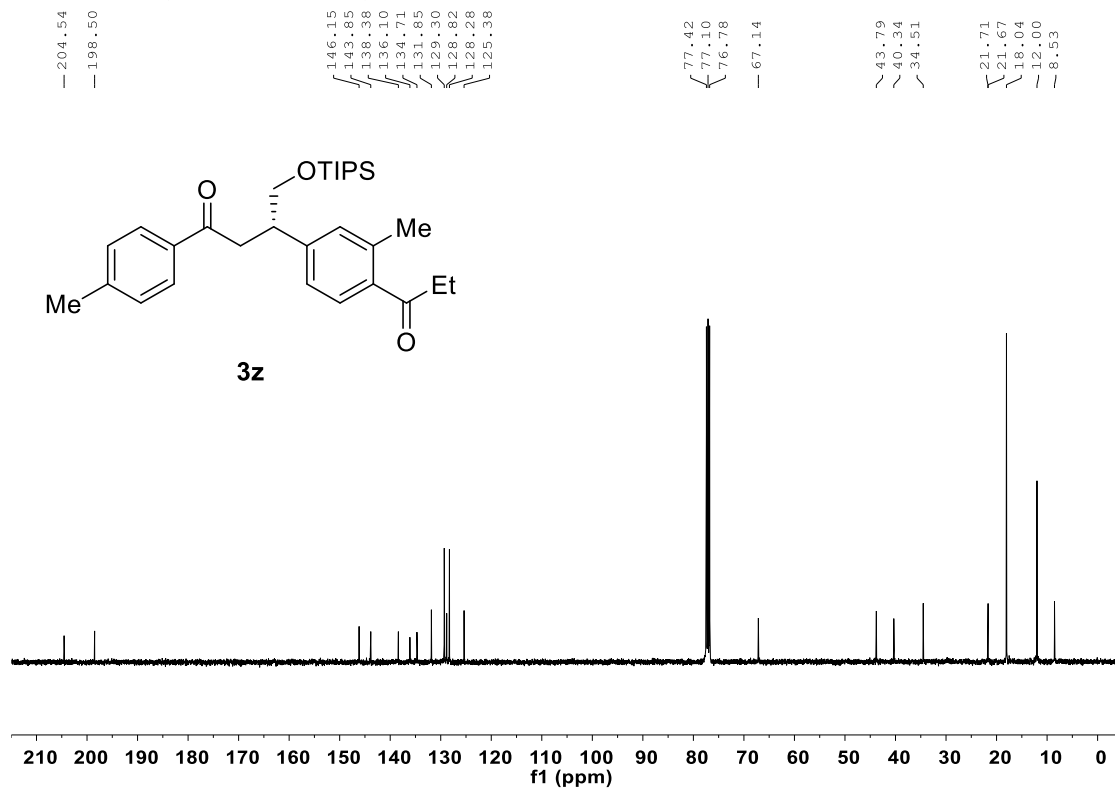

**3za** <sup>1</sup>H NMR (400M Hz, CDCl<sub>3</sub>)

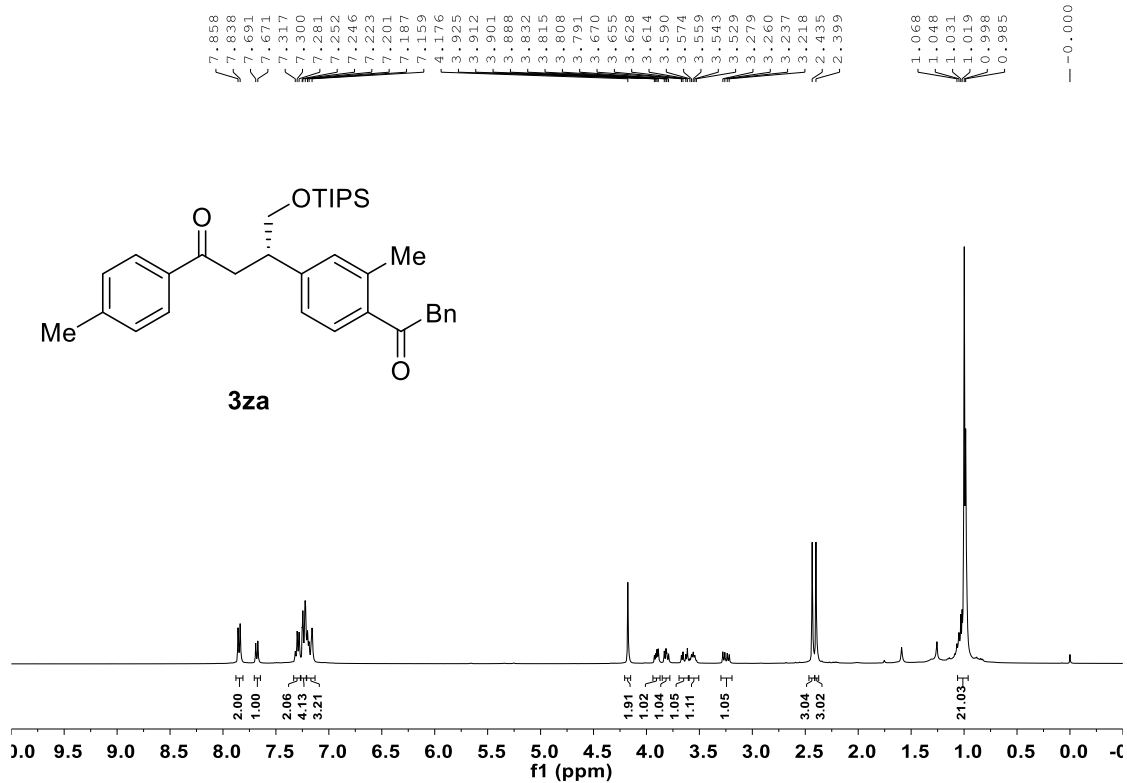

**3za** <sup>13</sup>C NMR (400M Hz, CDCl<sub>3</sub>)

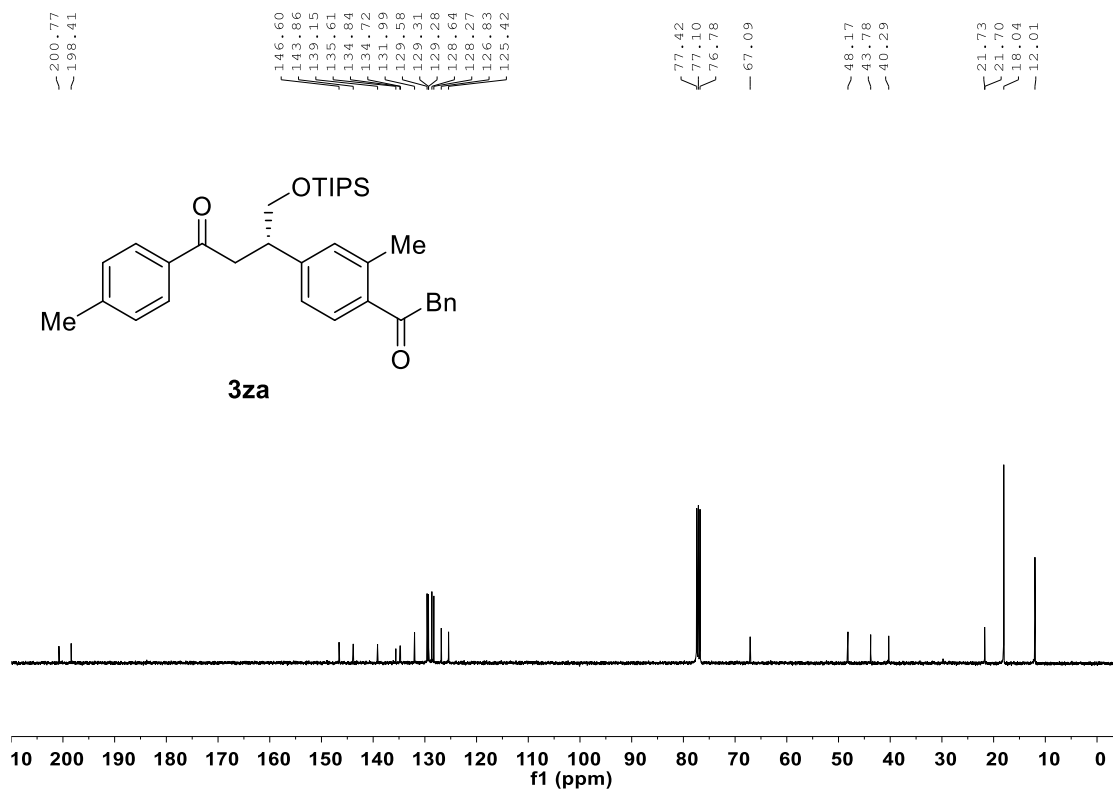



**3zb** <sup>1</sup>H NMR (400M Hz, CDCl<sub>3</sub>)

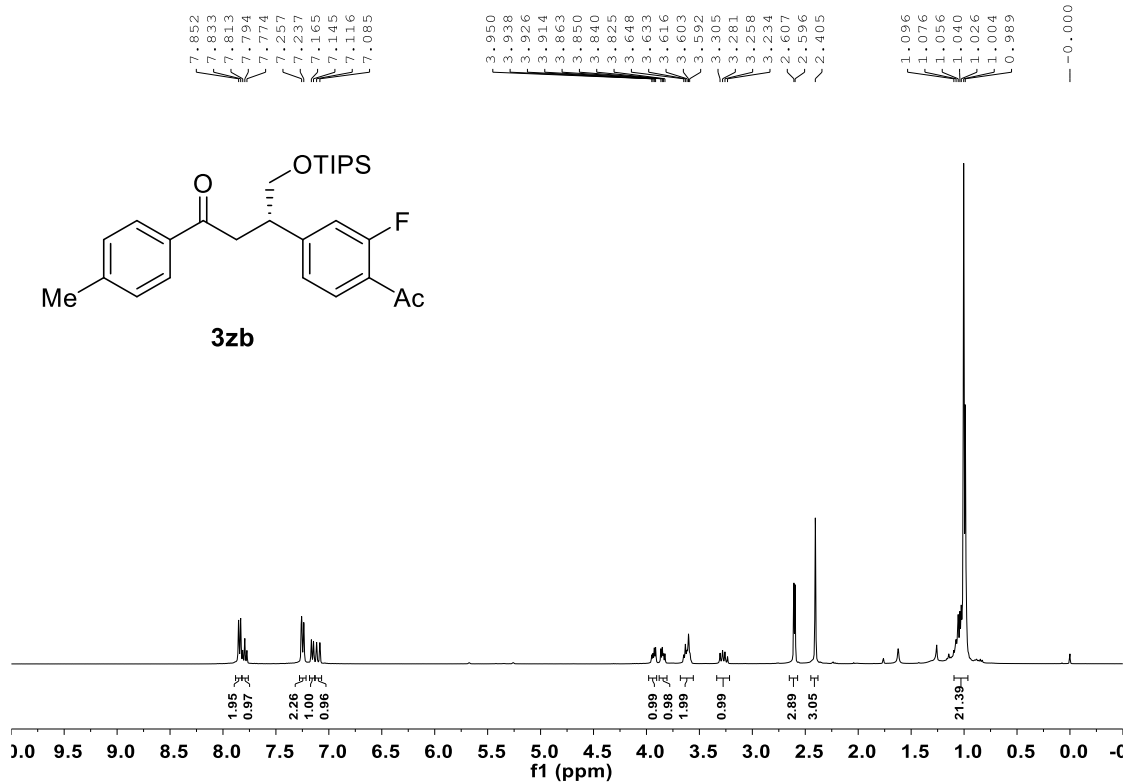

**3zb** <sup>13</sup>C NMR (400M Hz, CDCl<sub>3</sub>)

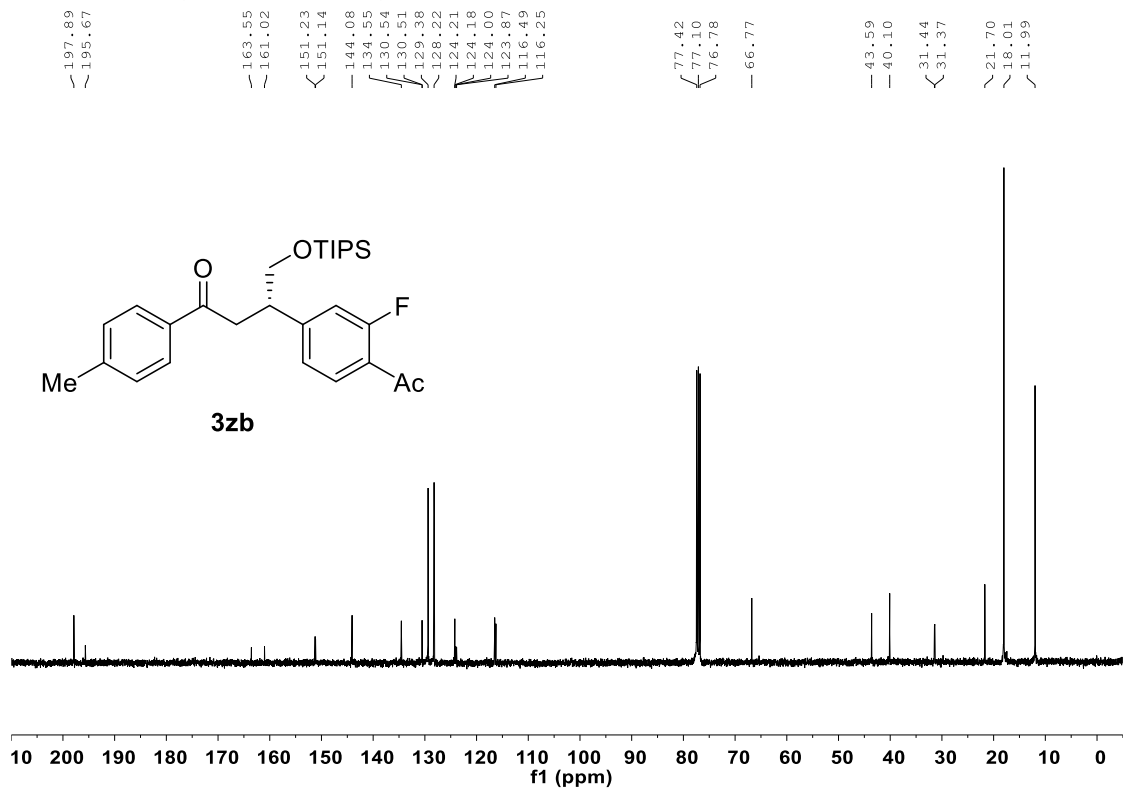

**3zc** <sup>1</sup>H NMR (400M Hz, CDCl<sub>3</sub>)

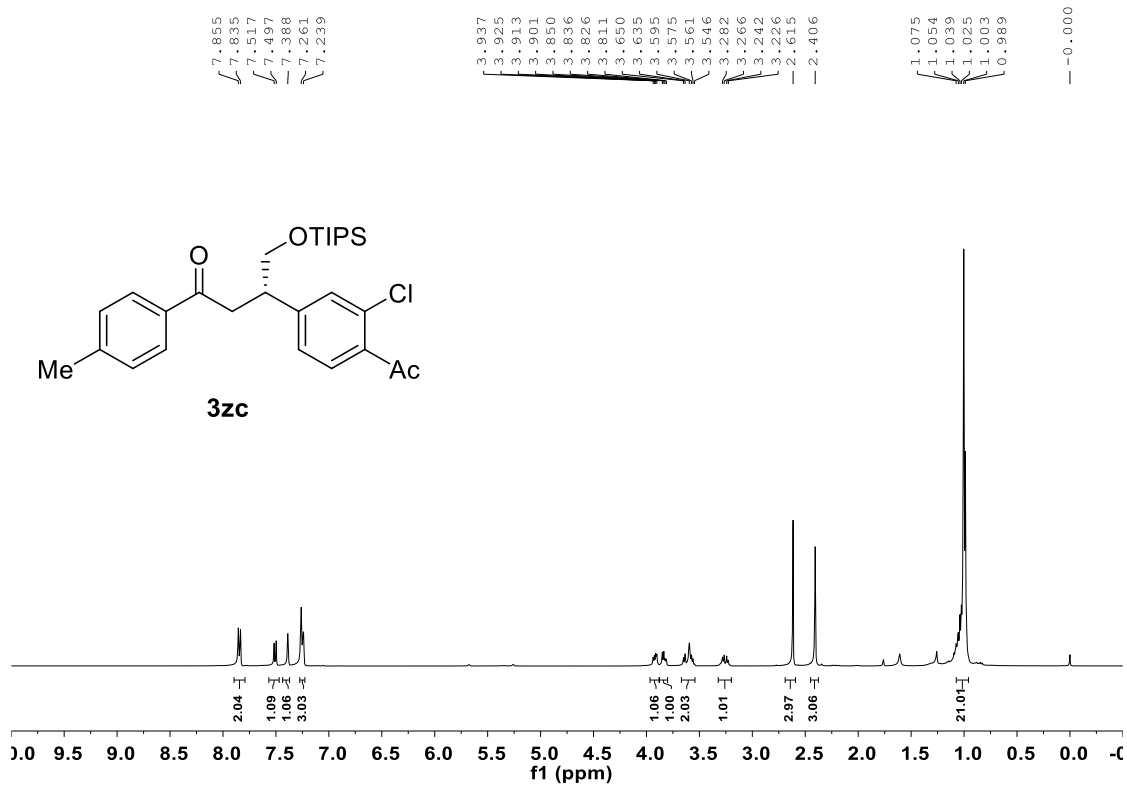

**3zc** <sup>13</sup>C NMR (400M Hz, CDCl<sub>3</sub>)

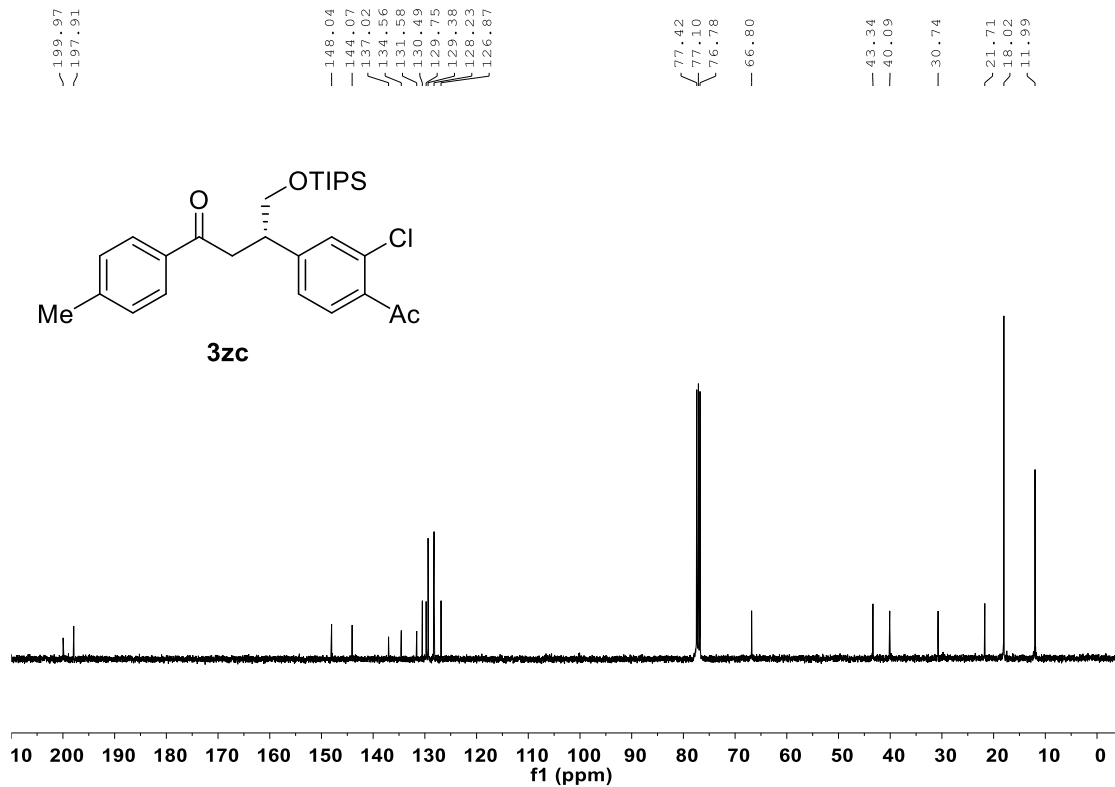

**3zd** <sup>1</sup>H NMR (400M Hz, CDCl<sub>3</sub>)

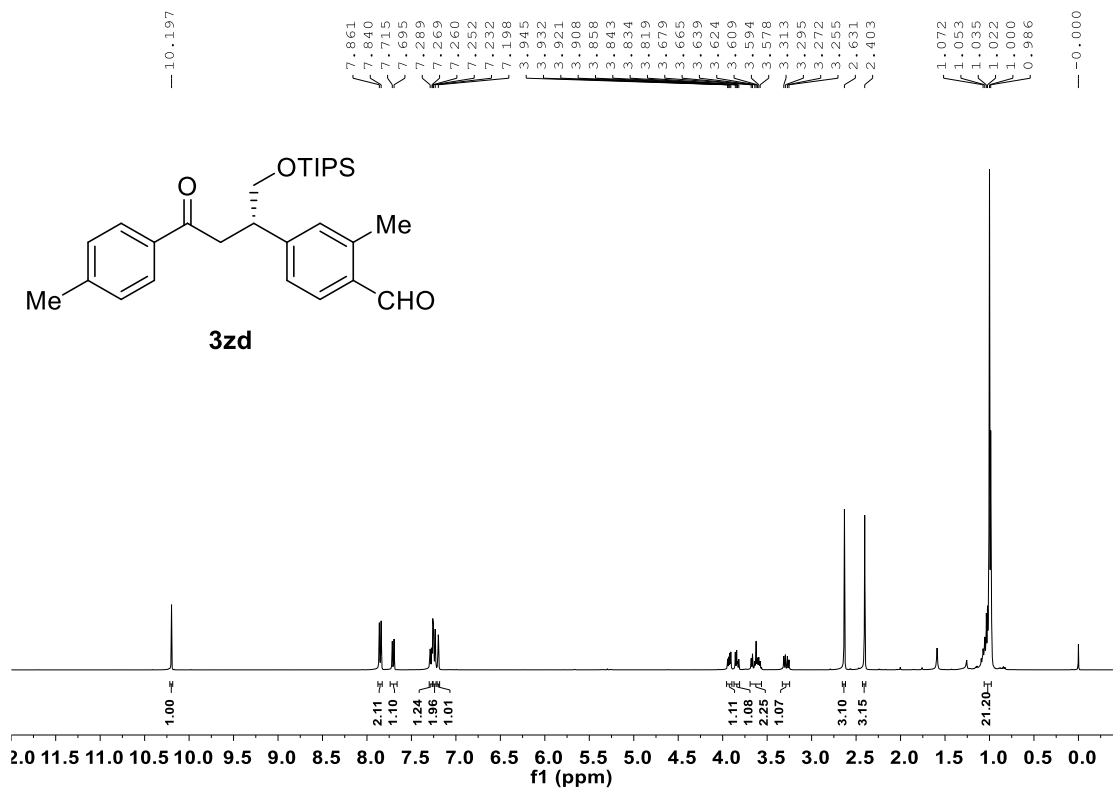

**3zd** <sup>13</sup>C NMR (400M Hz, CDCl<sub>3</sub>)

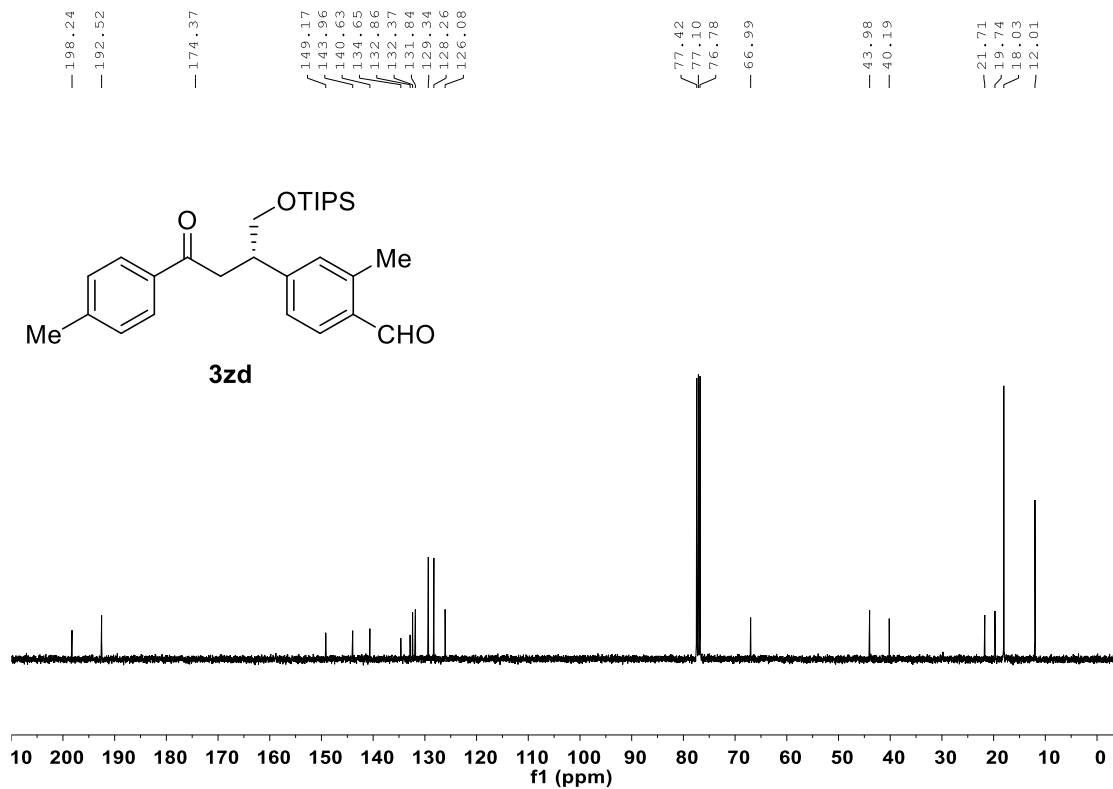

**3ze**  $^1\text{H}$  NMR (400M Hz,  $\text{CDCl}_3$ )

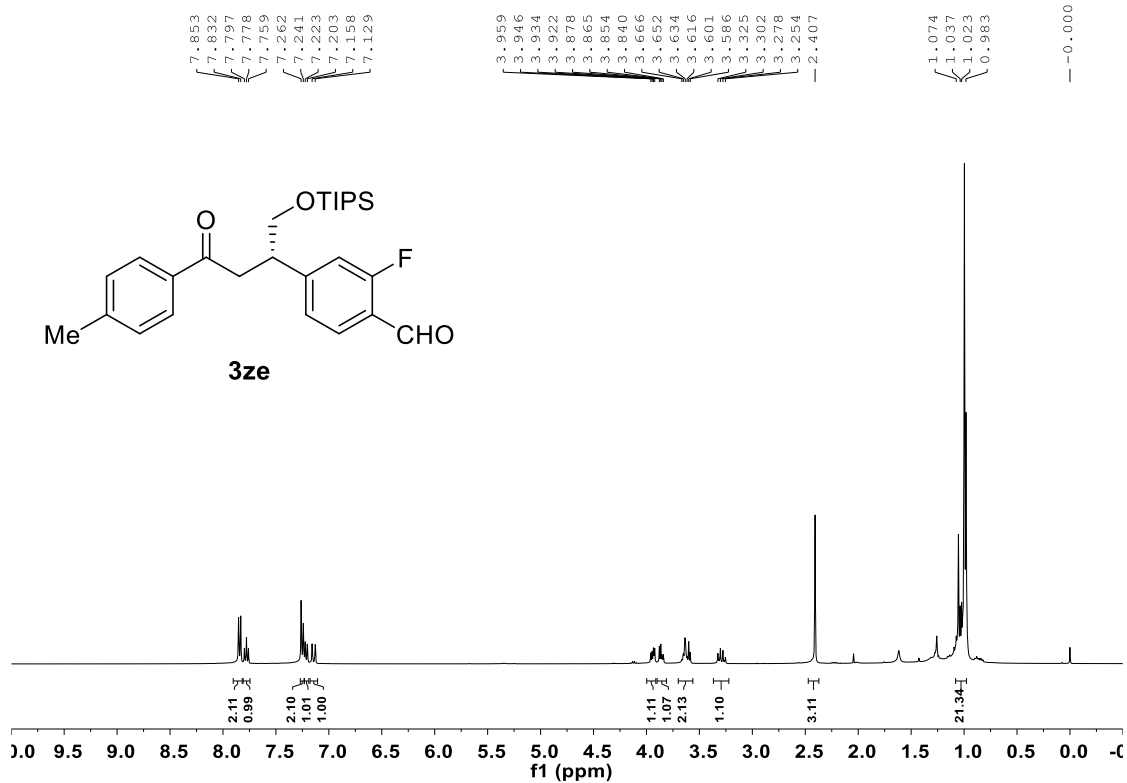

**3ze**  $^{13}\text{C}$  NMR (400M Hz,  $\text{CDCl}_3$ )

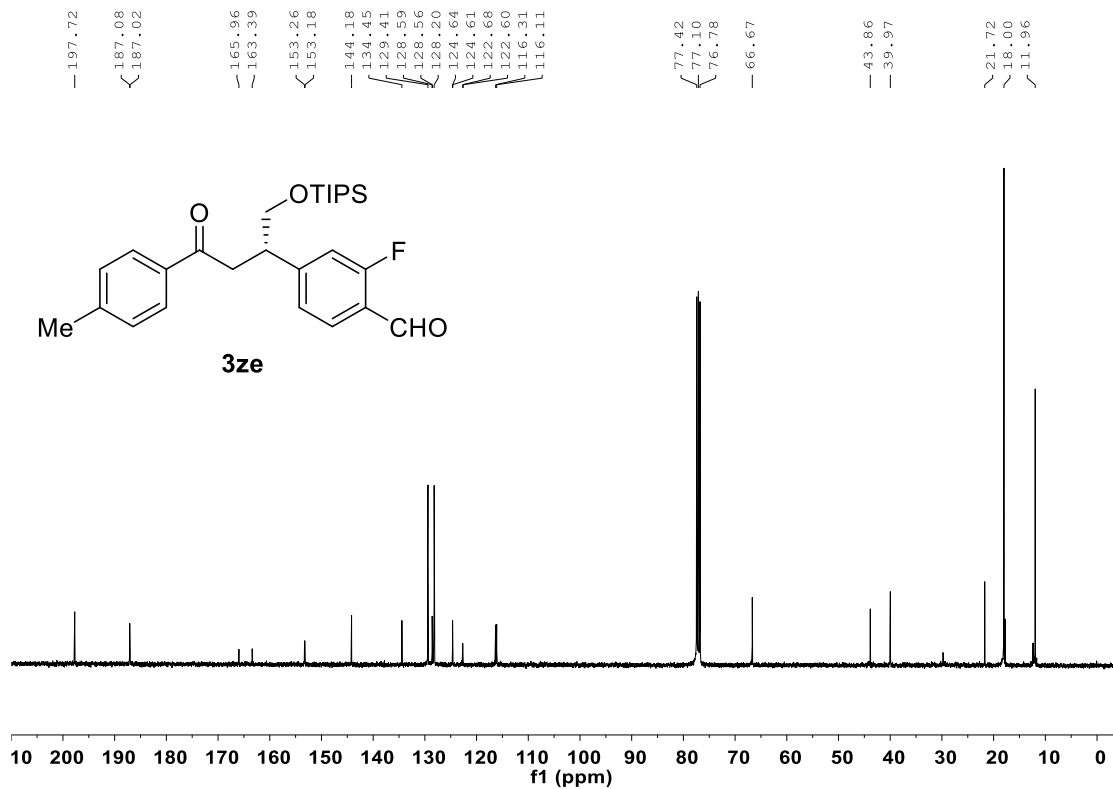

**3zf**  $^1\text{H}$  NMR (400M Hz,  $\text{CDCl}_3$ )

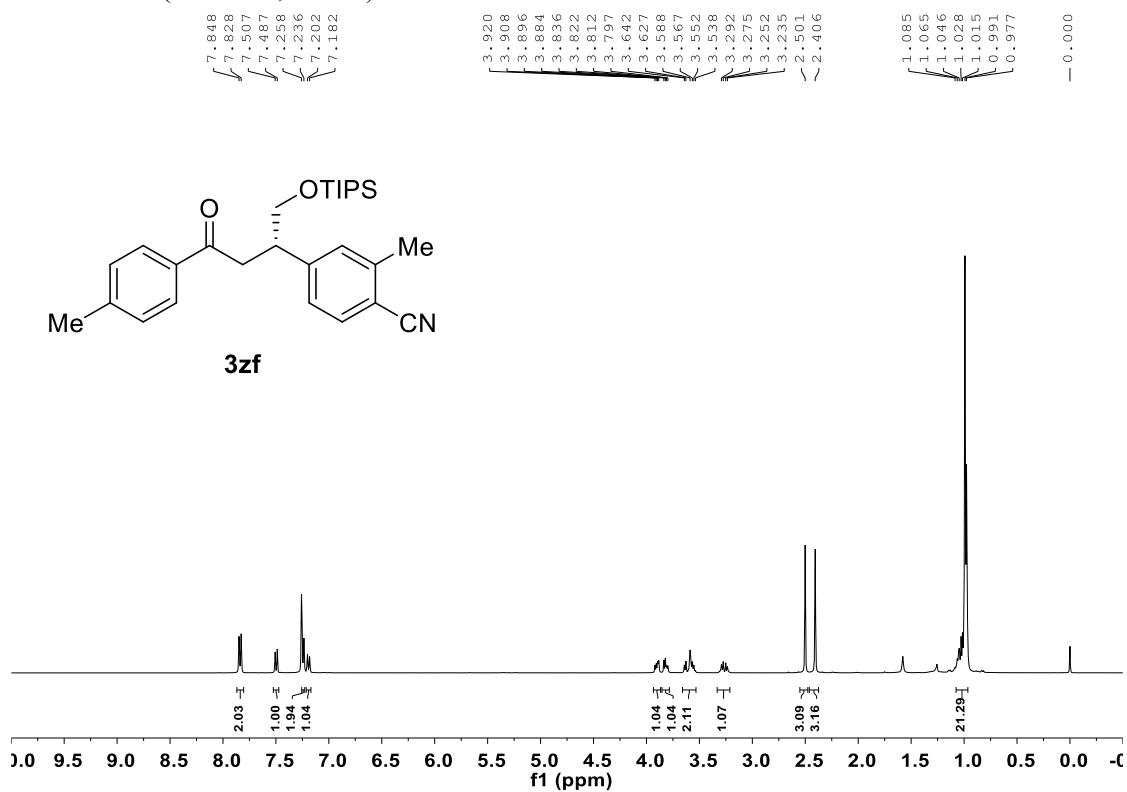

**3zf**  $^{13}\text{C}$  NMR (400M Hz,  $\text{CDCl}_3$ )

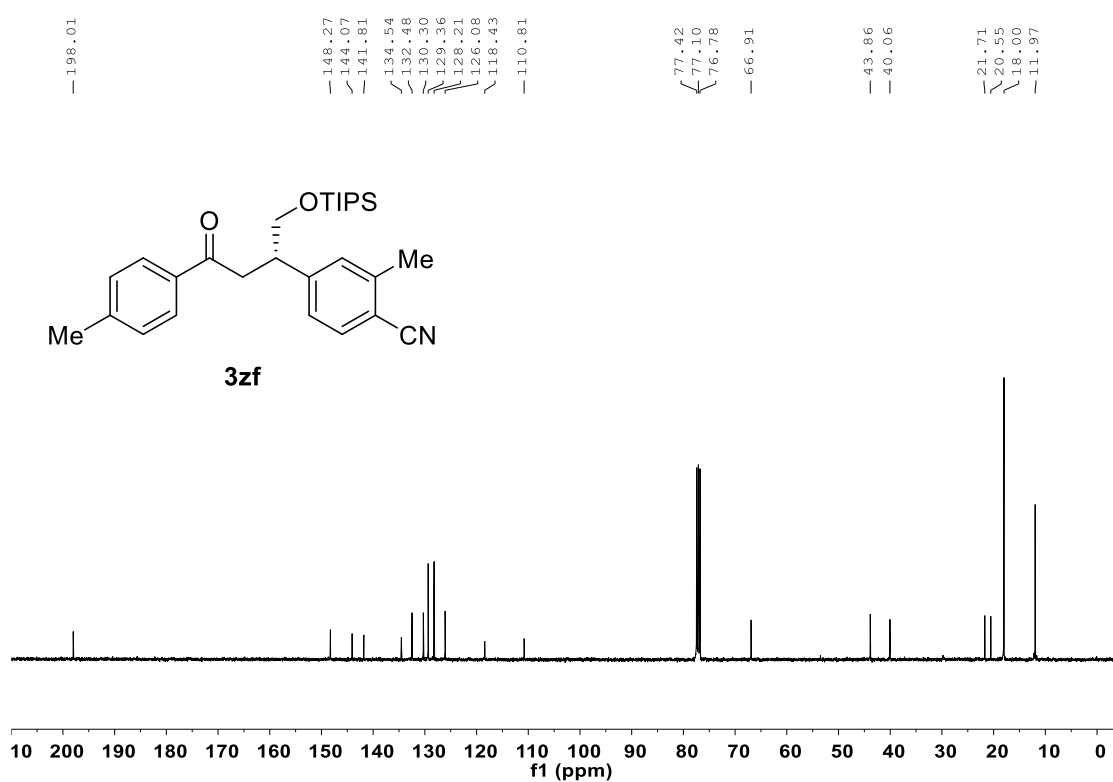

**3zg**  $^1\text{H}$  NMR (400M Hz,  $\text{CDCl}_3$ )

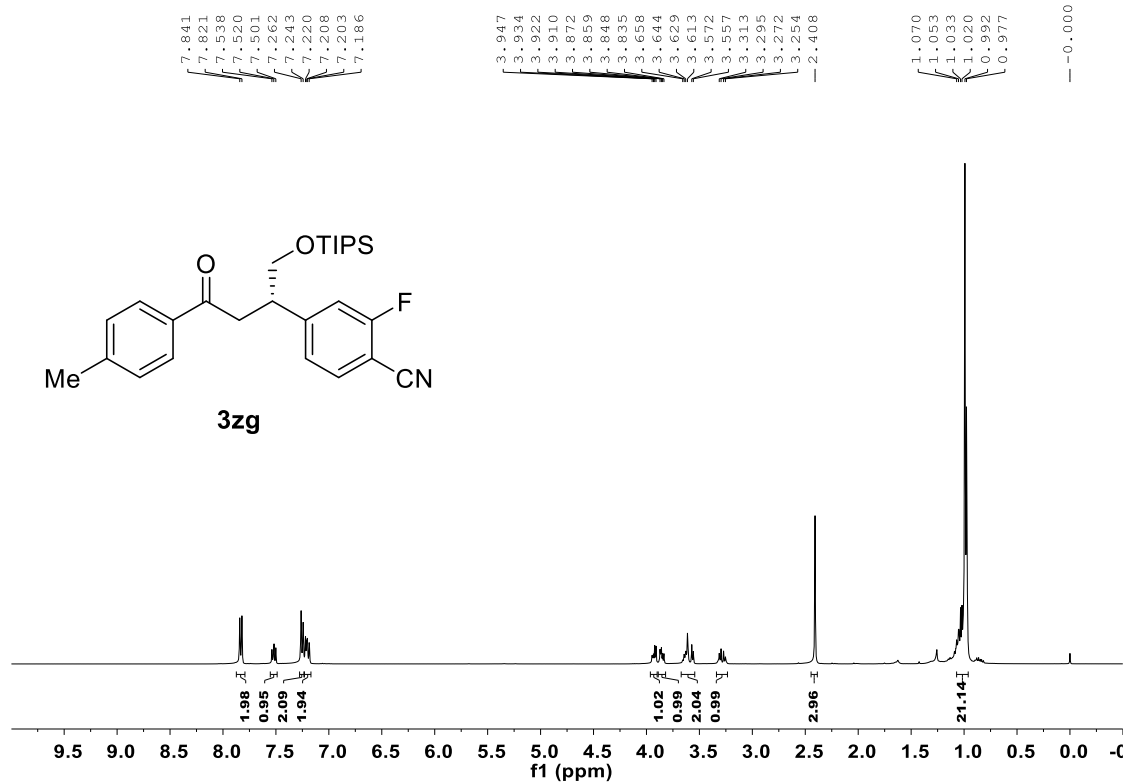

**3zg**  $^{13}\text{C}$  NMR (400M Hz,  $\text{CDCl}_3$ )

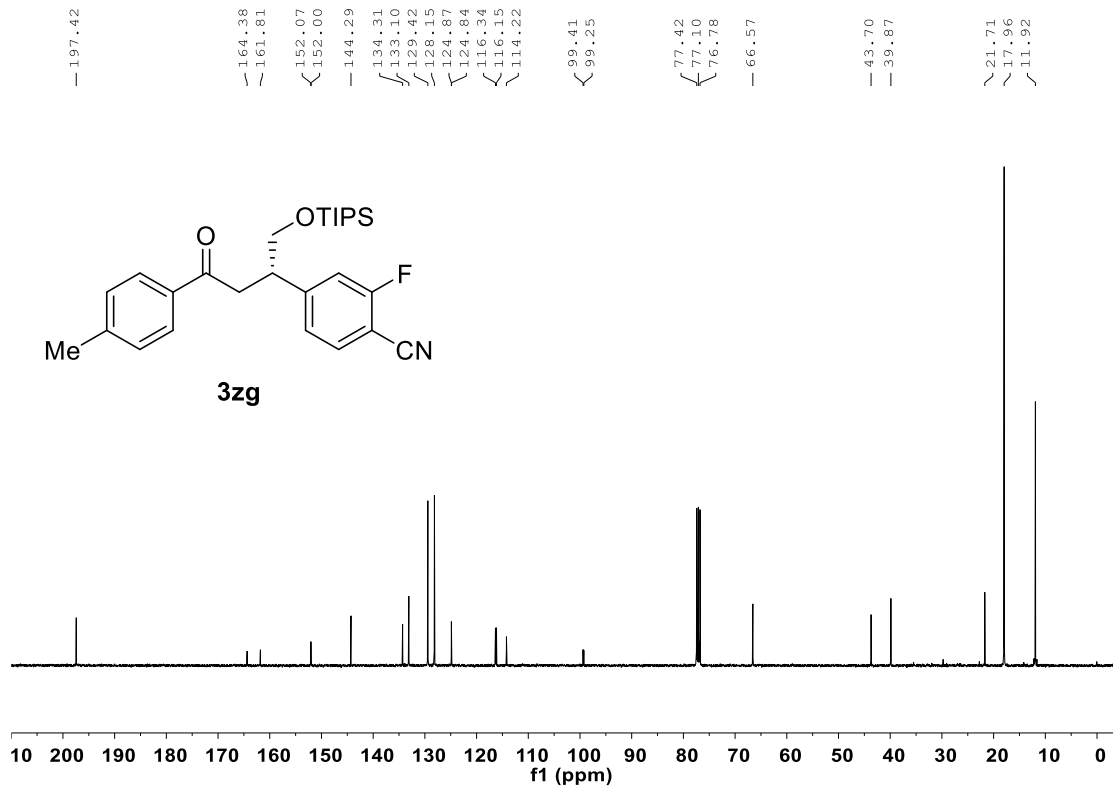

**3zh**  $^1\text{H}$  NMR (400M Hz,  $\text{CDCl}_3$ )

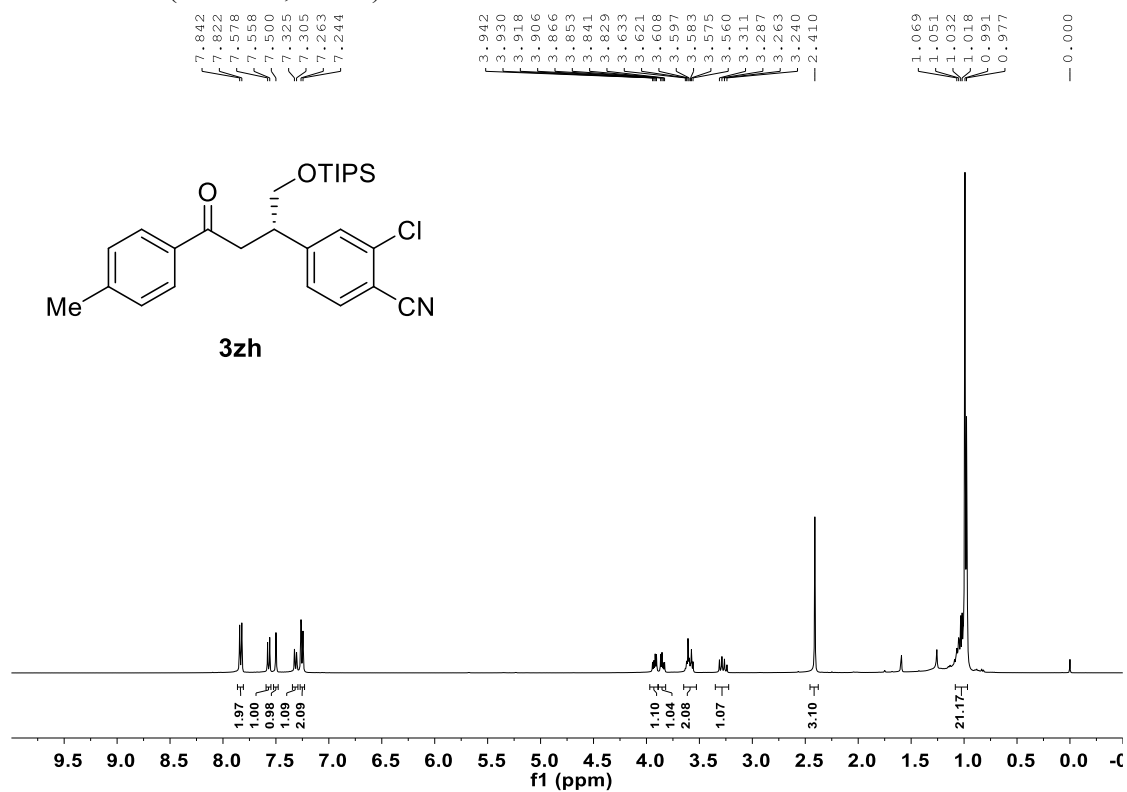

**3zh**  $^{13}\text{C}$  NMR (400M Hz,  $\text{CDCl}_3$ )

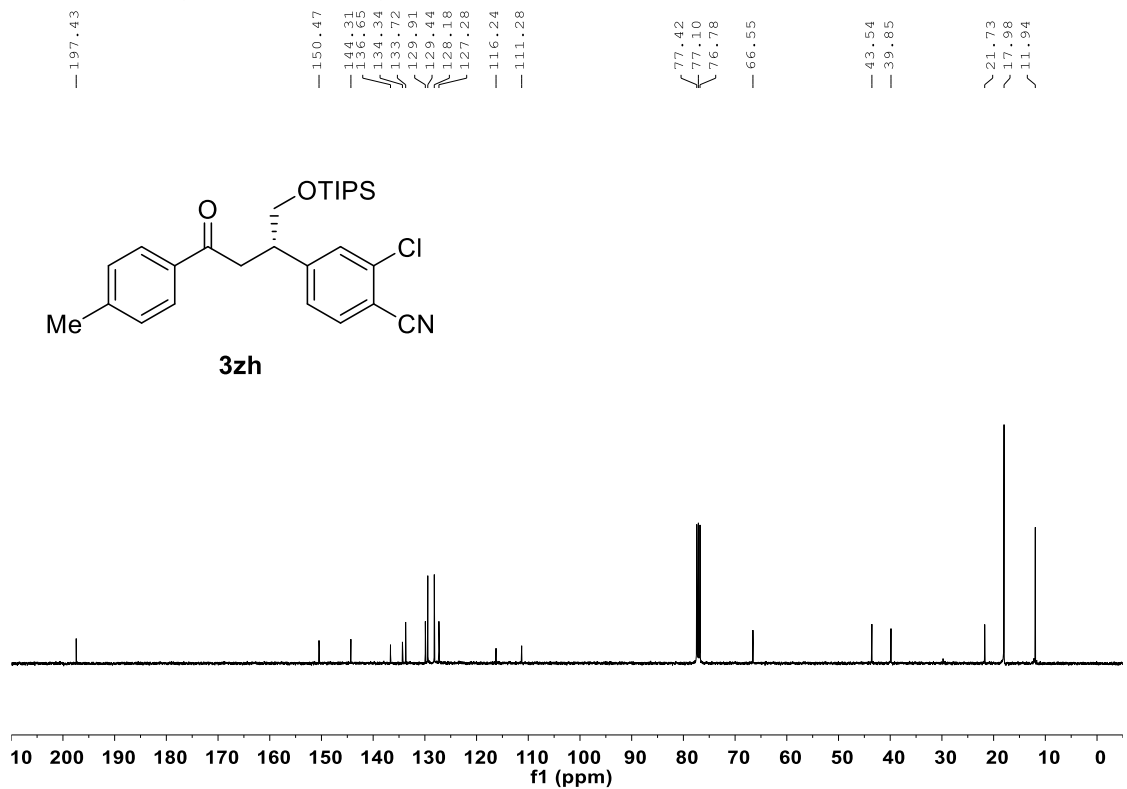

**3zi** <sup>1</sup>H NMR (400M Hz, CDCl<sub>3</sub>)

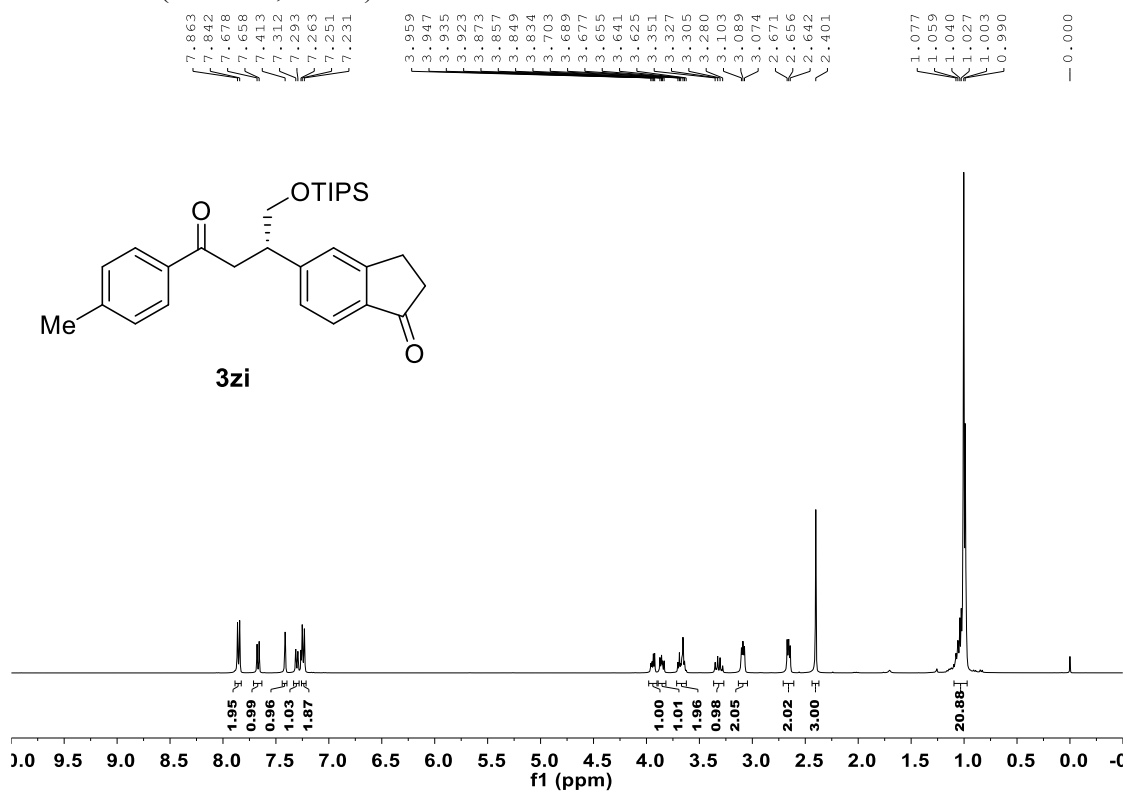

**3zi** <sup>13</sup>C NMR (400M Hz, CDCl<sub>3</sub>)

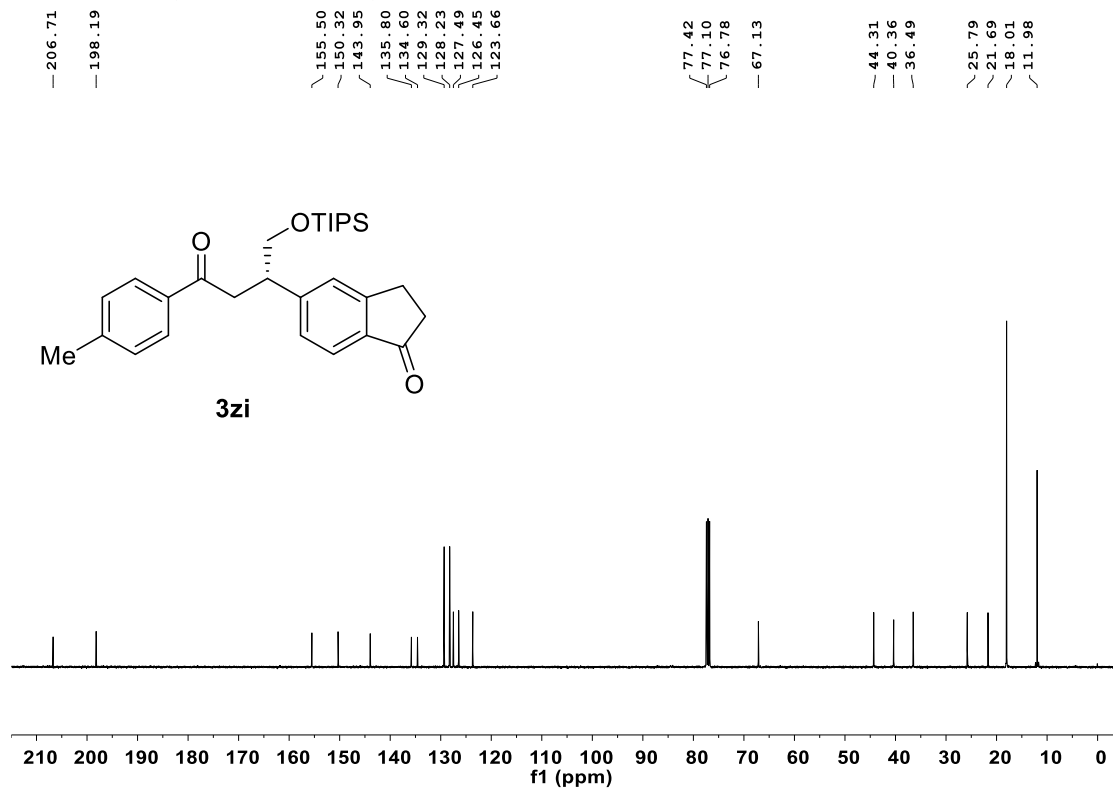



**3zj** <sup>1</sup>H NMR (400M Hz, CDCl<sub>3</sub>)

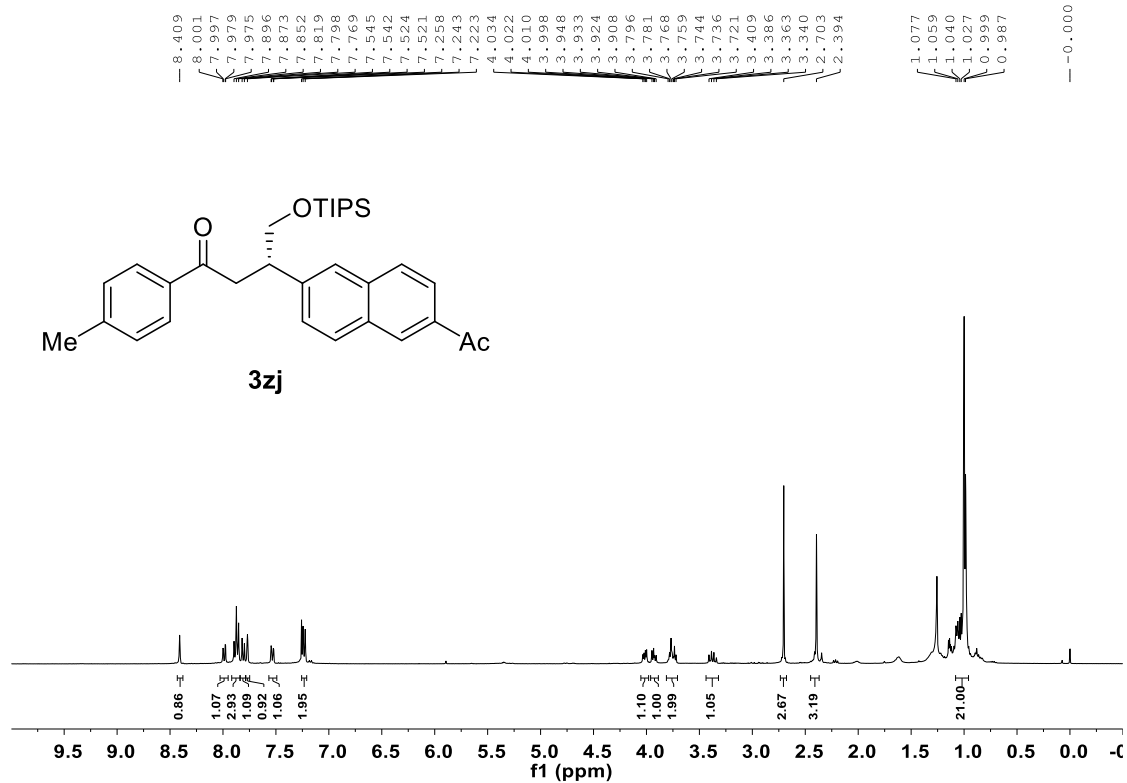

**3zj** <sup>13</sup>C NMR (400M Hz, CDCl<sub>3</sub>)

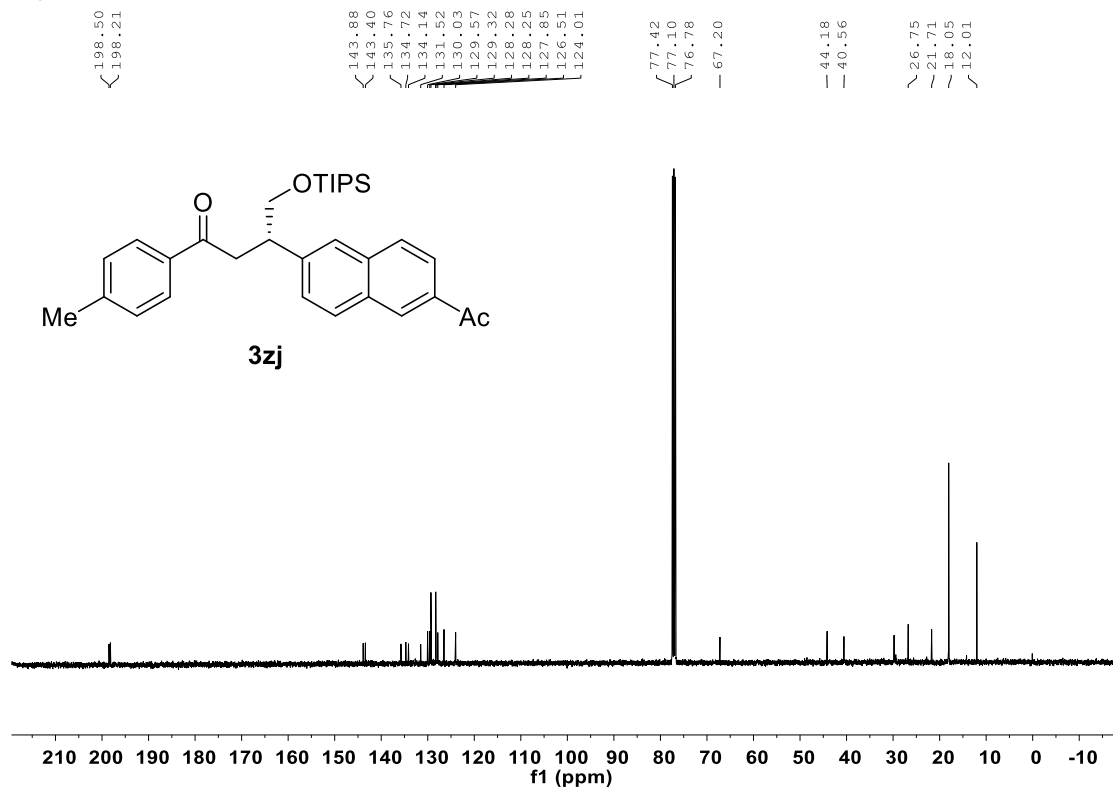

**3zk** <sup>1</sup>H NMR (400M Hz, CDCl<sub>3</sub>)

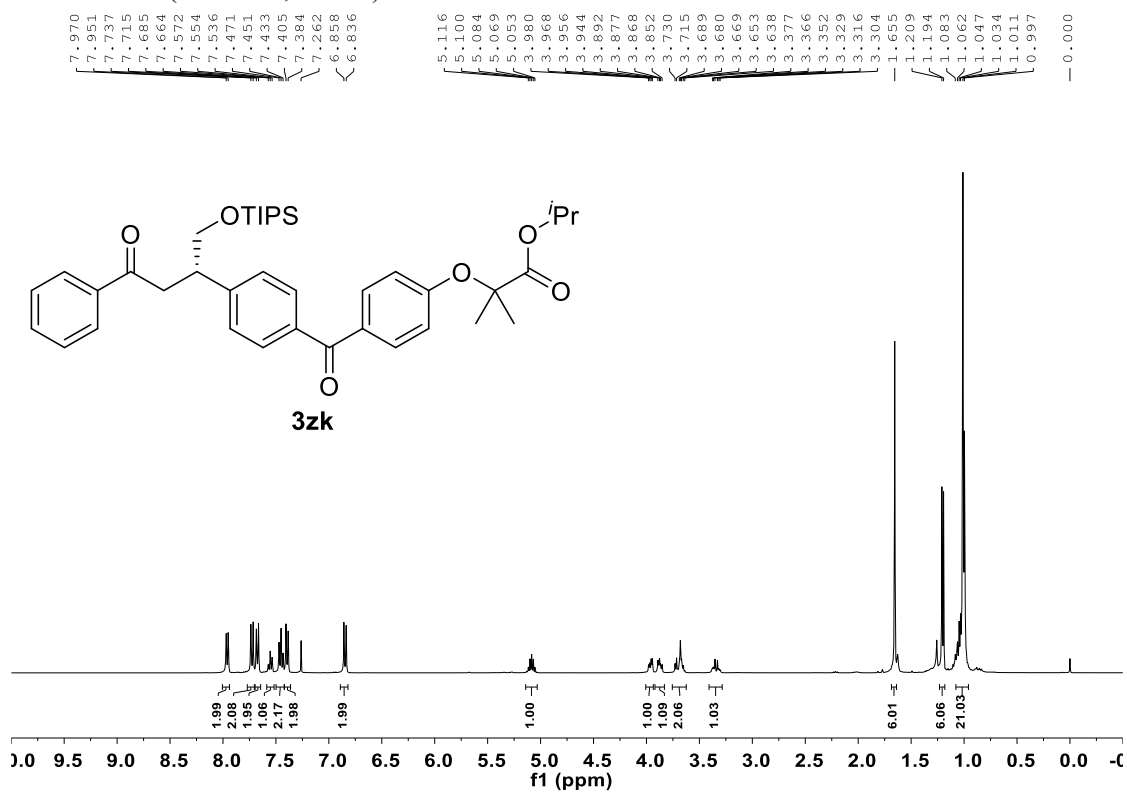

**3zk** <sup>13</sup>C NMR (400M Hz, CDCl<sub>3</sub>)

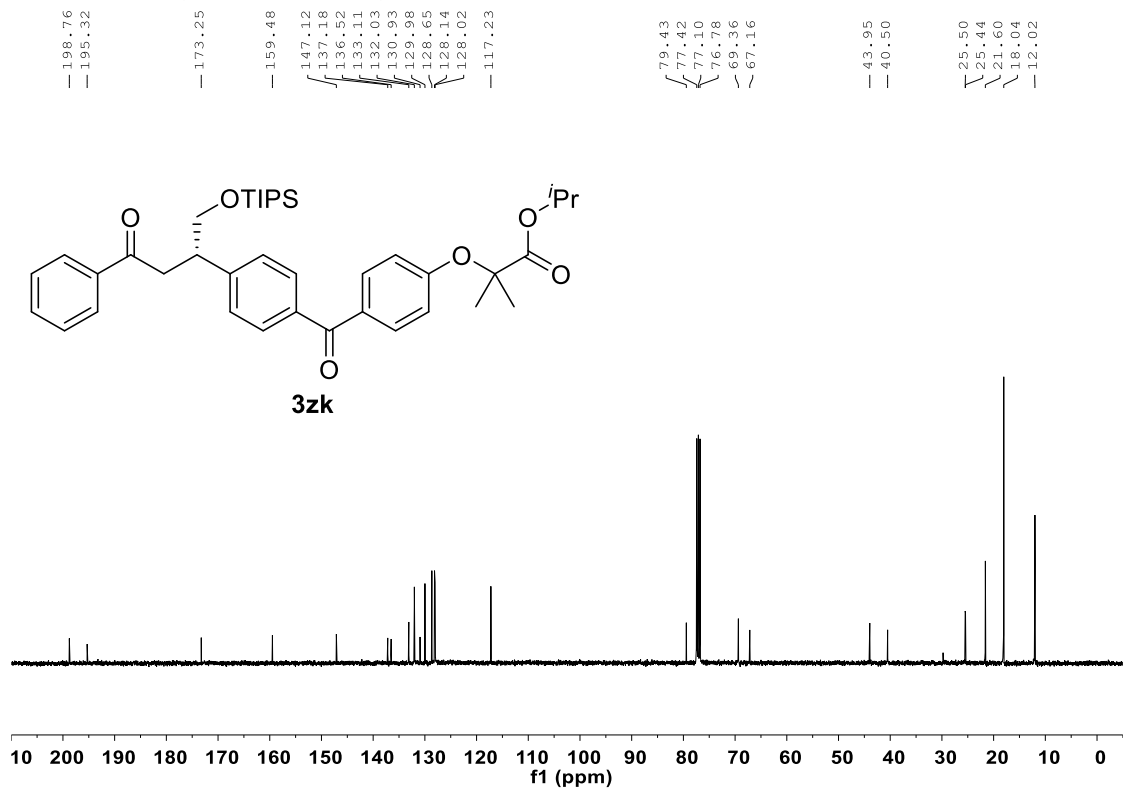

**3zl**  $^1\text{H}$  NMR (400M Hz,  $\text{CDCl}_3$ )

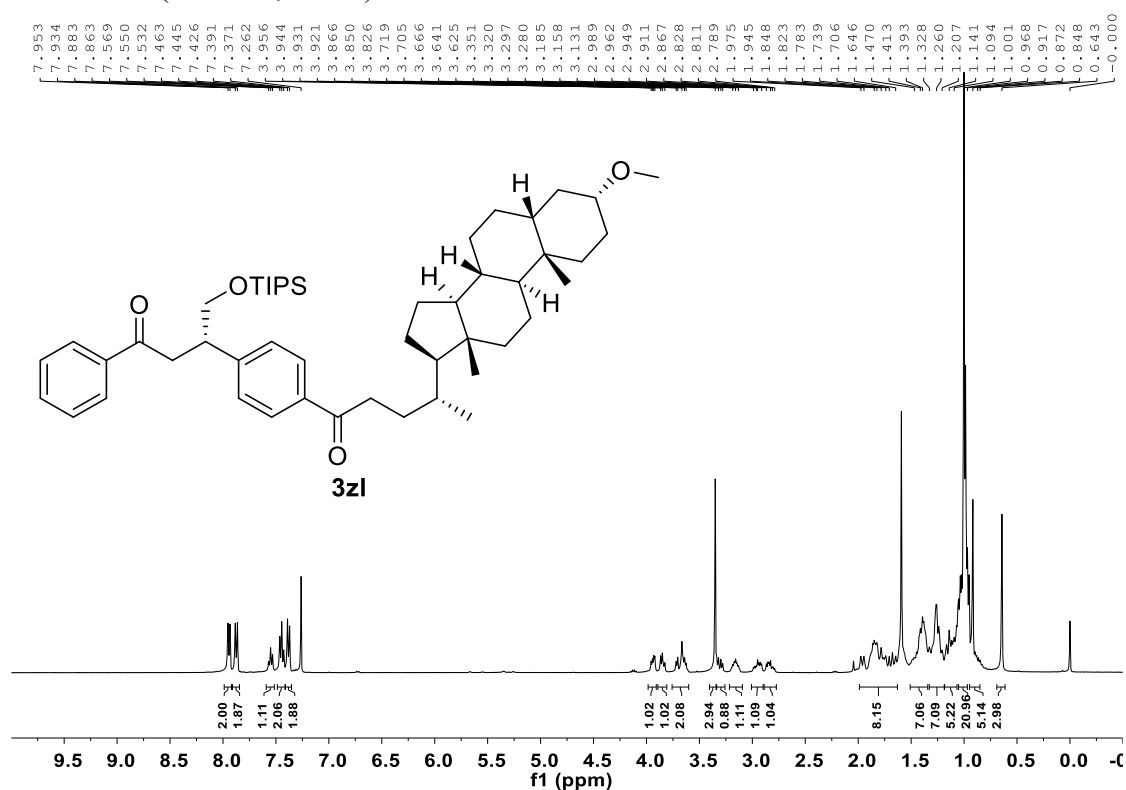

**3zl**  $^{13}\text{C}$  NMR (400M Hz,  $\text{CDCl}_3$ )

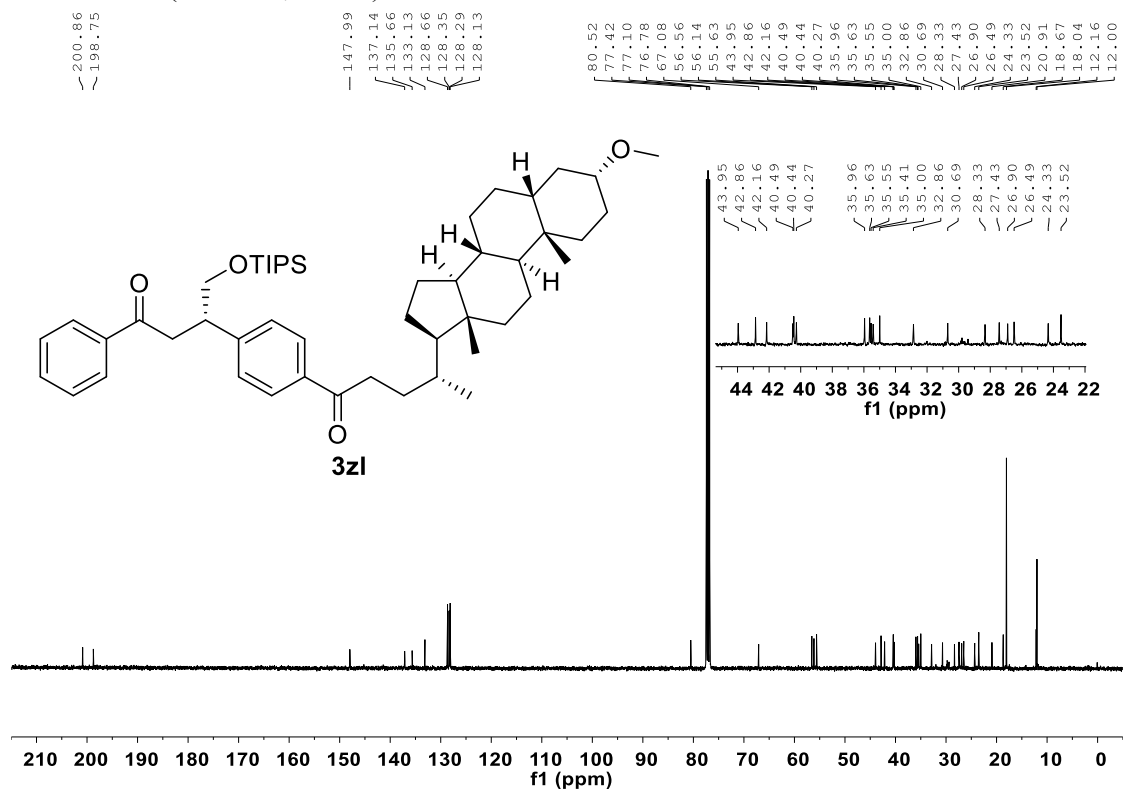

**3zm**  $^1\text{H}$  NMR (400M Hz,  $\text{CDCl}_3$ )

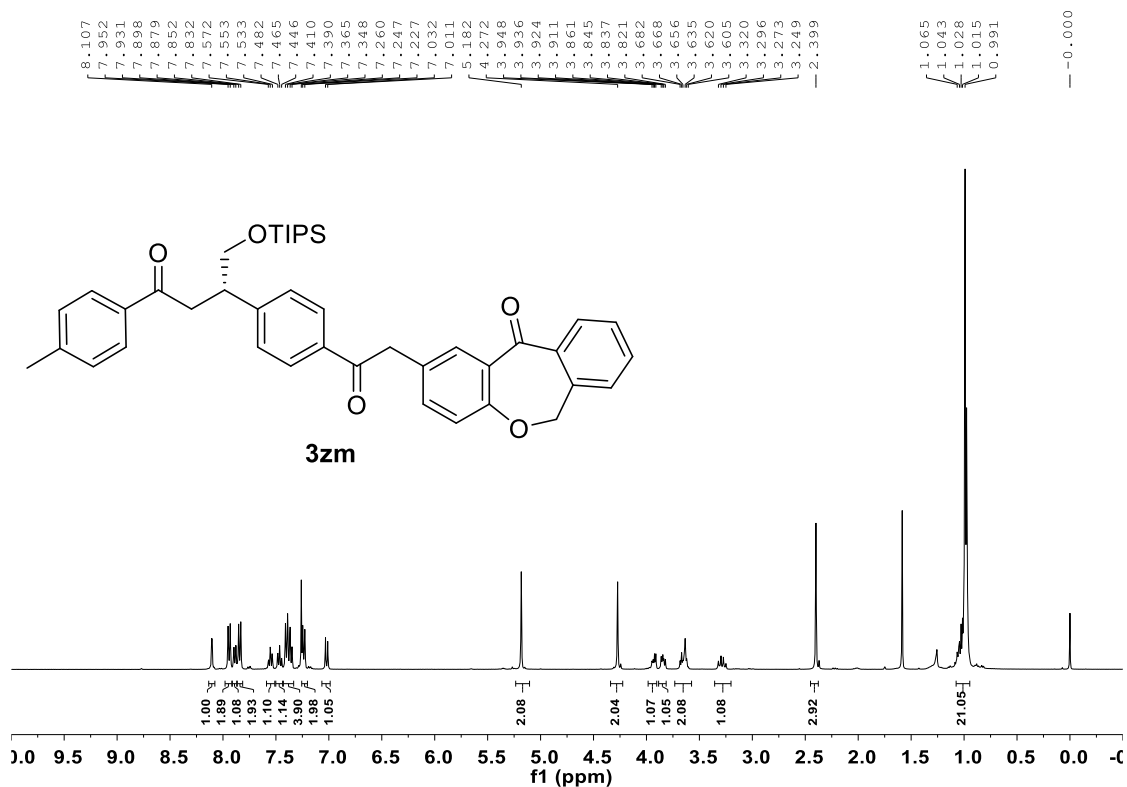

**3zm**  $^{13}\text{C}$  NMR (400M Hz,  $\text{CDCl}_3$ )

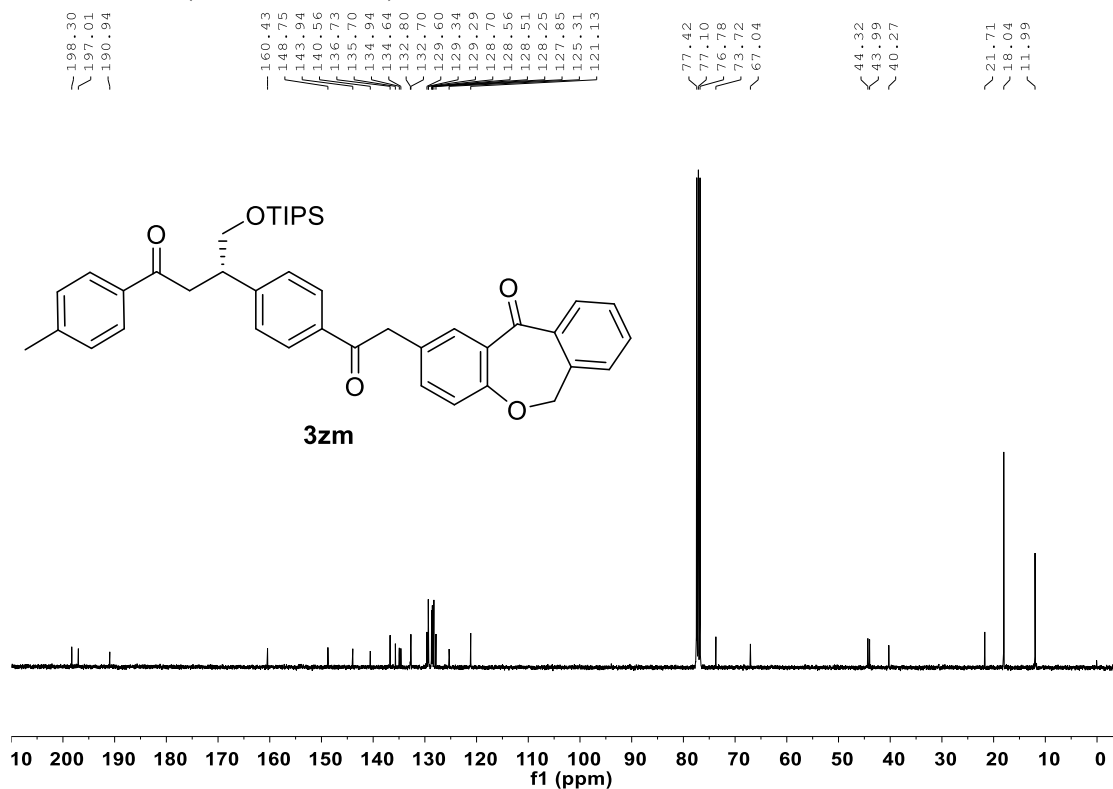

Large-scale of **3a**  $^1\text{H}$  NMR (400M Hz,  $\text{CDCl}_3$ )

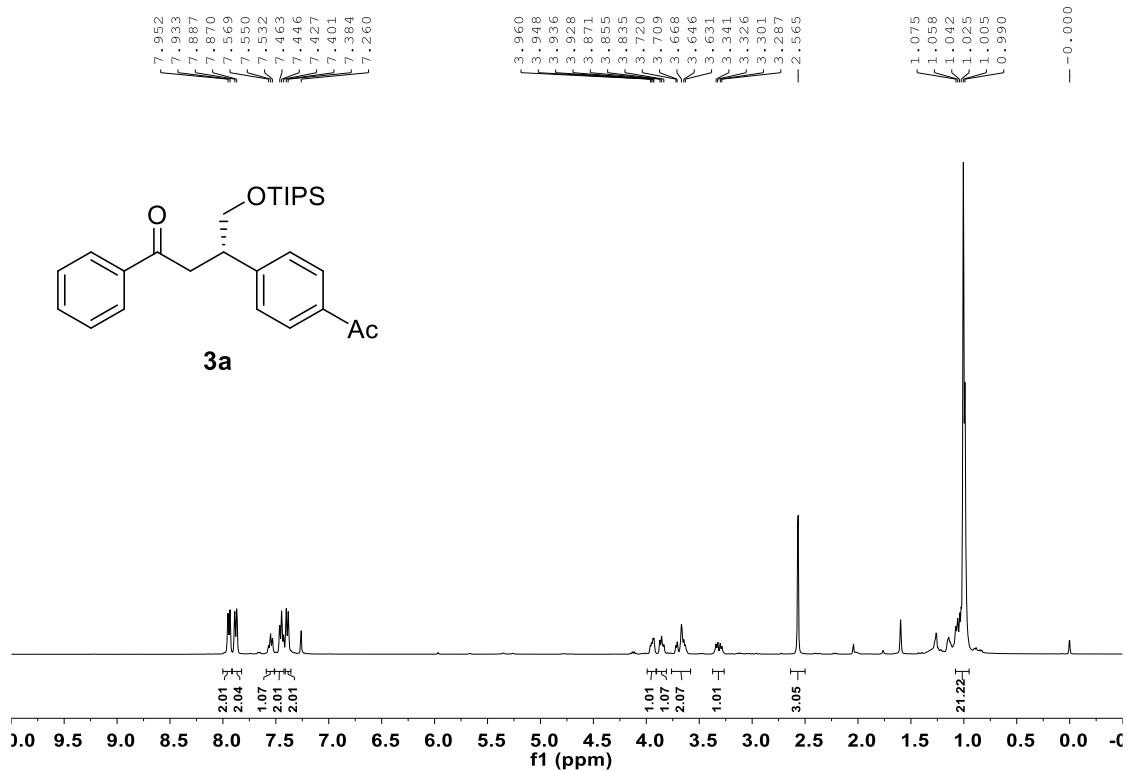

Large-scale of **3a**  $^{13}\text{C}$  NMR (400M Hz,  $\text{CDCl}_3$ )

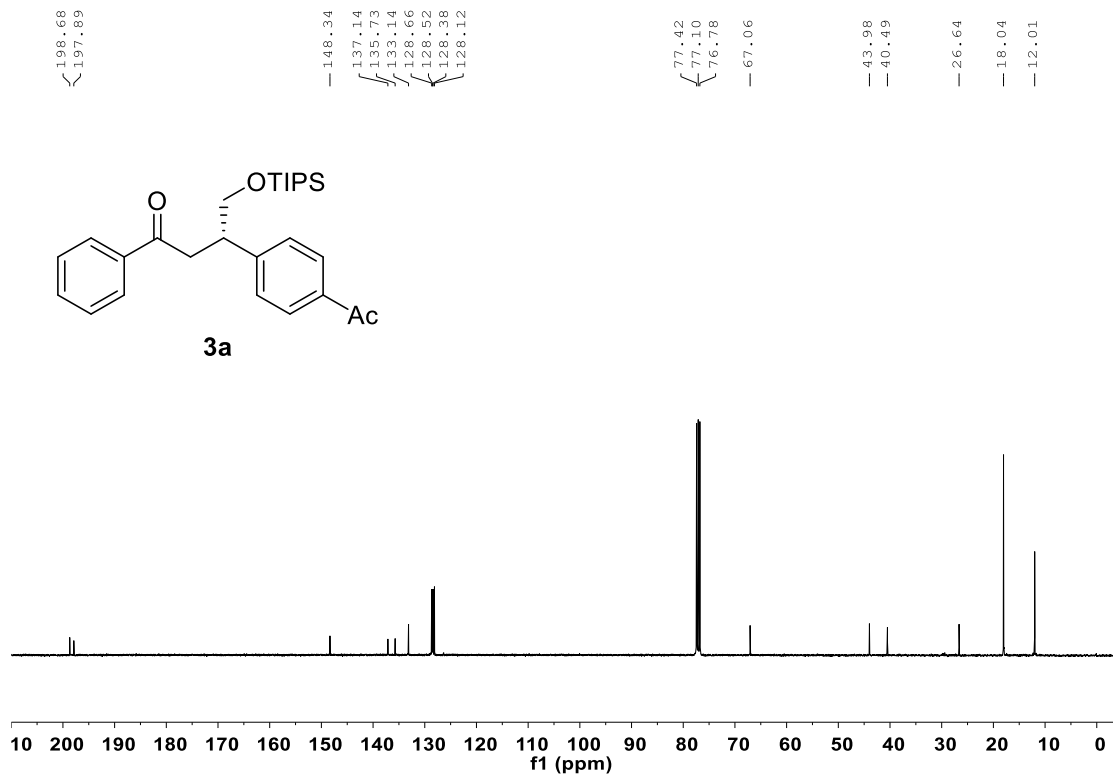

4 <sup>1</sup>H NMR (400M Hz, CDCl<sub>3</sub>)

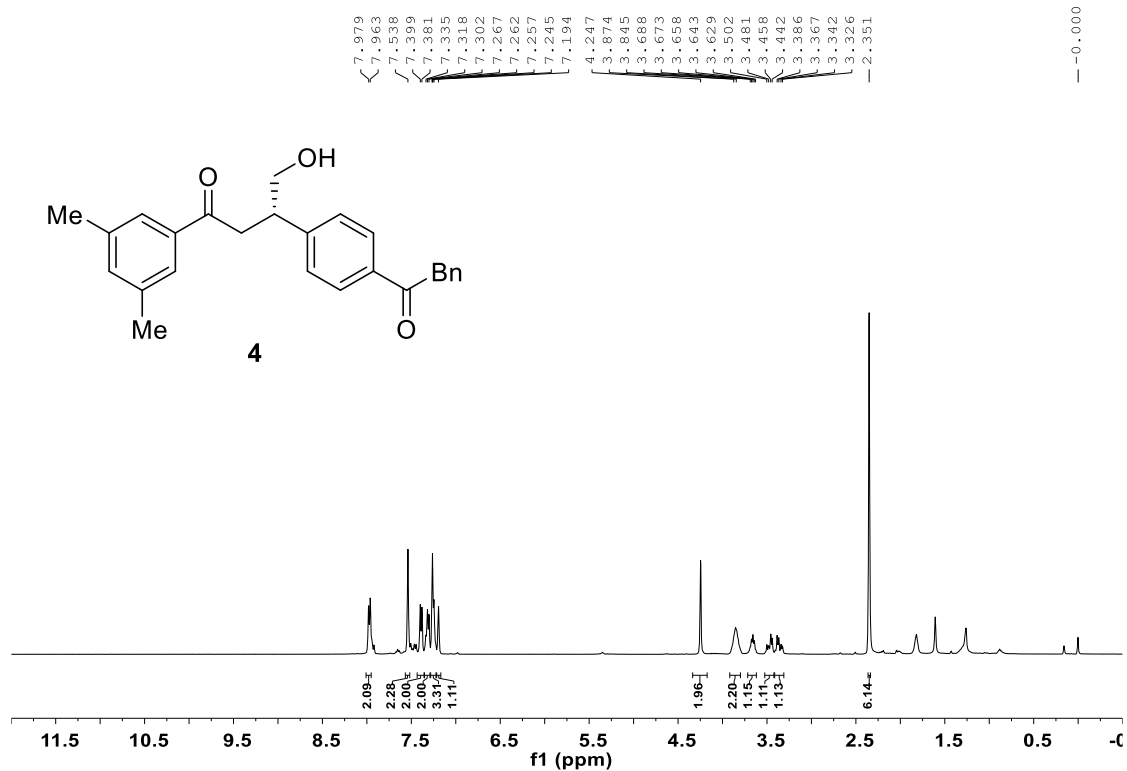

4 <sup>13</sup>C NMR (400M Hz, CDCl<sub>3</sub>)

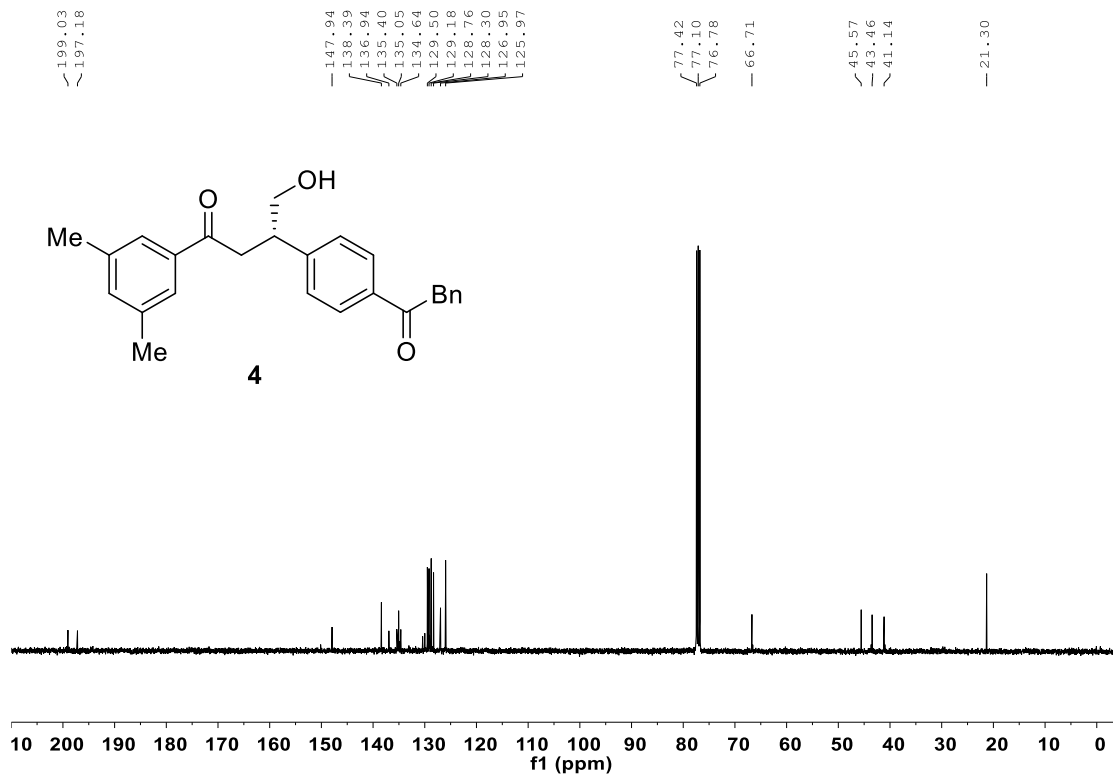

5 <sup>1</sup>H NMR (400M Hz, CD<sub>3</sub>OD)

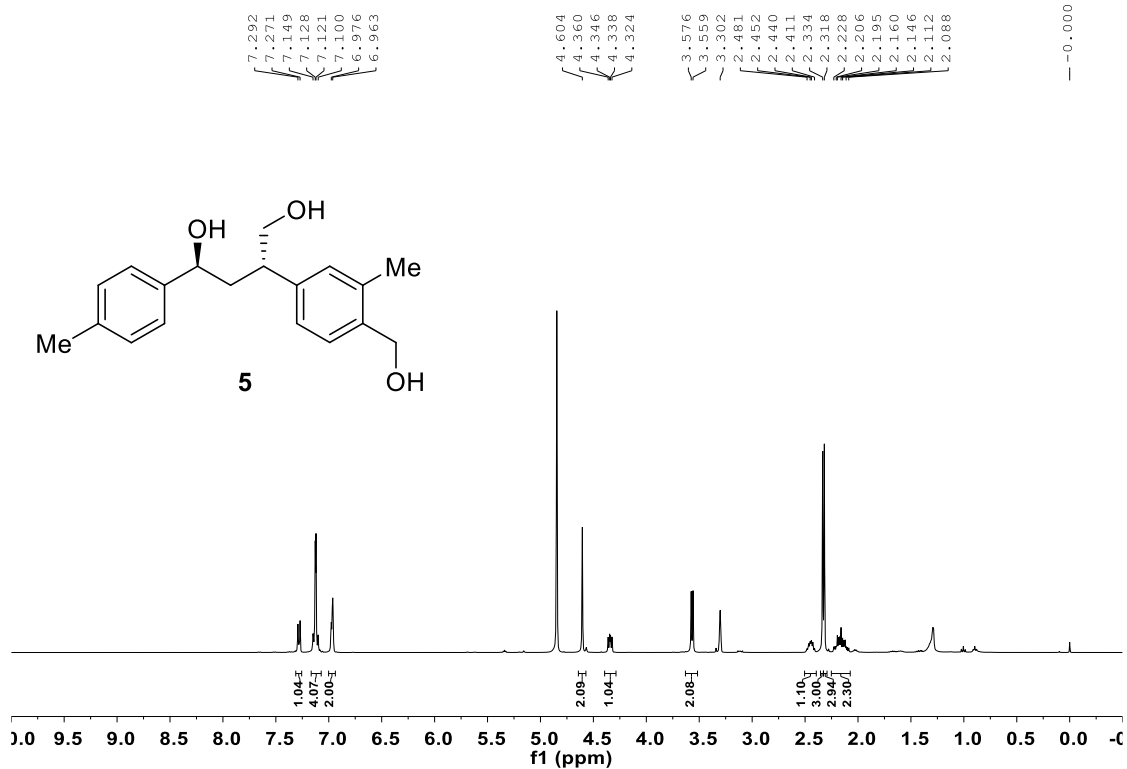

5 <sup>13</sup>C NMR (400M Hz, CD<sub>3</sub>OD)

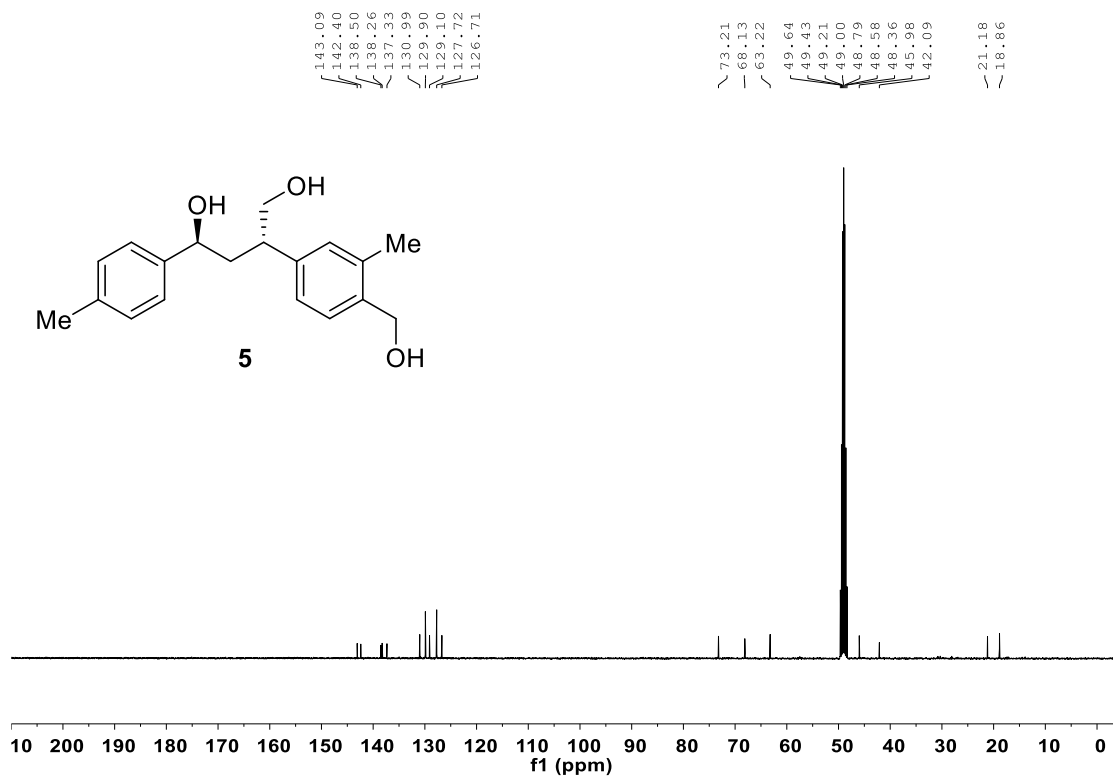

**6**  $^1\text{H}$  NMR (400M Hz,  $\text{CDCl}_3$ )

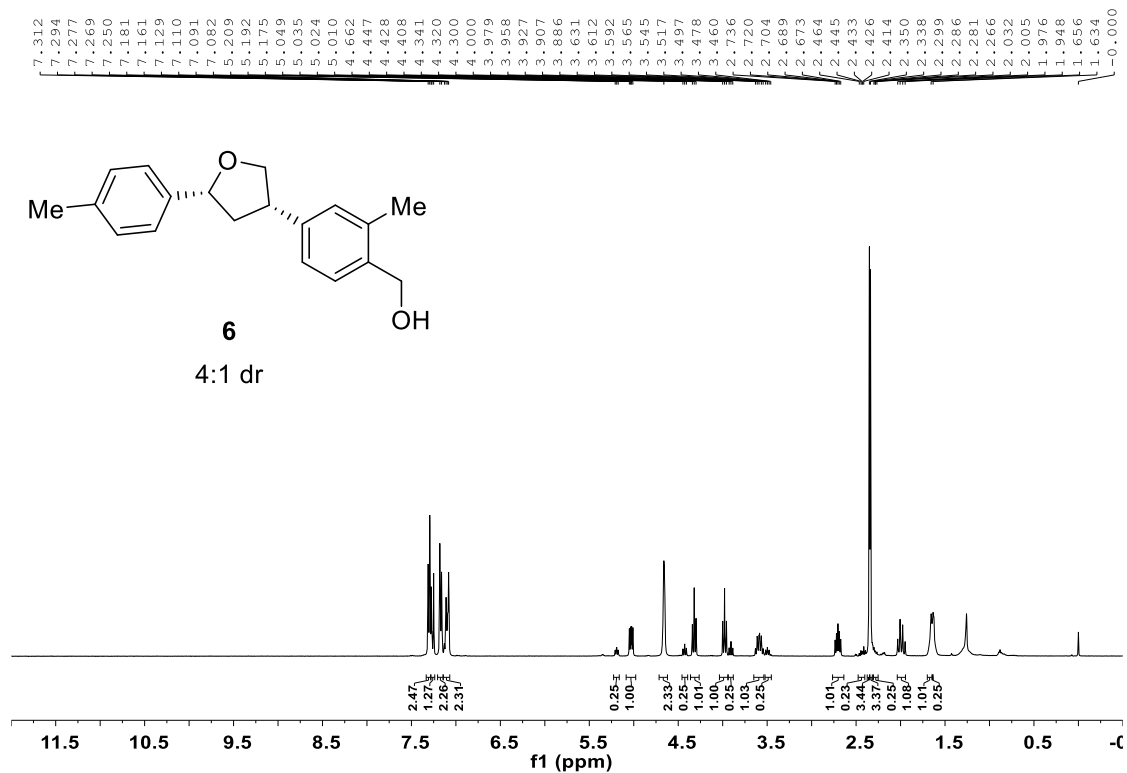

**6**  $^{13}\text{C}$  NMR (400M Hz,  $\text{CDCl}_3$ )

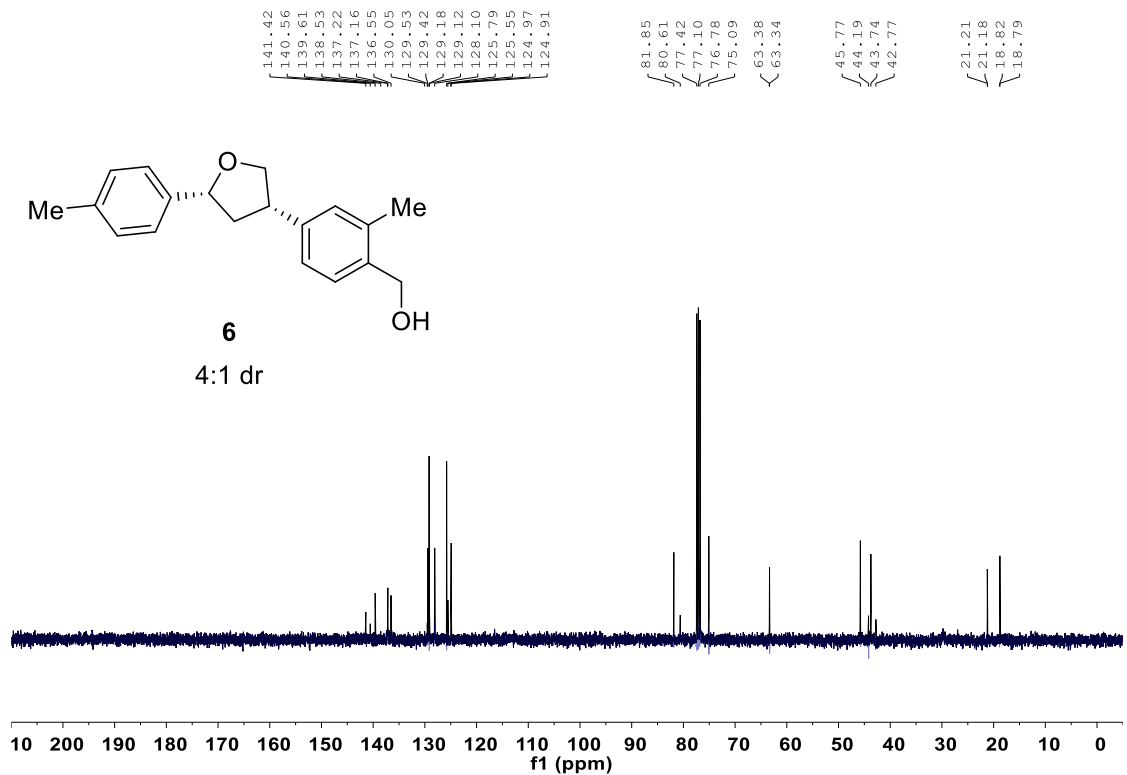



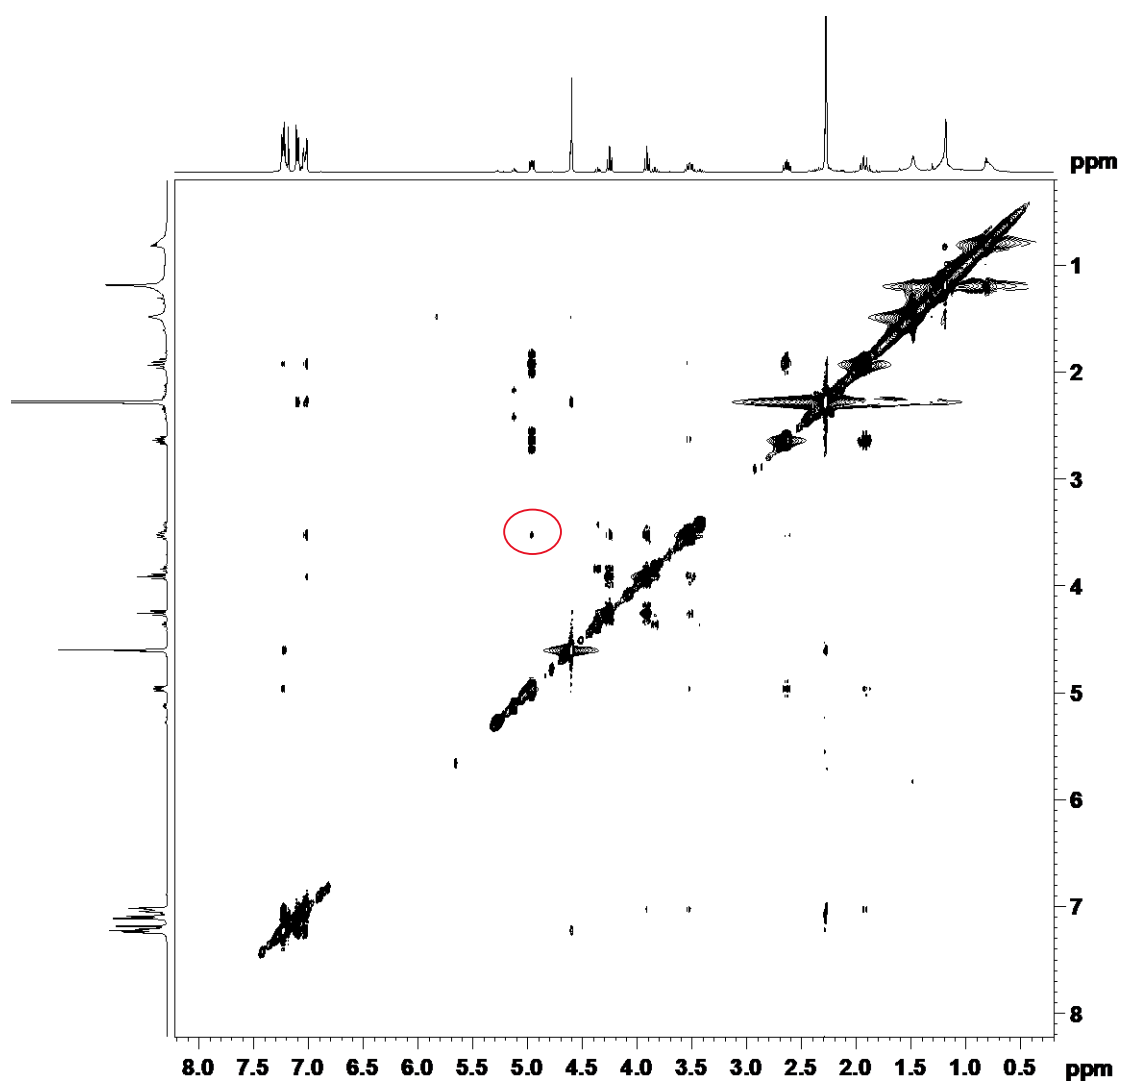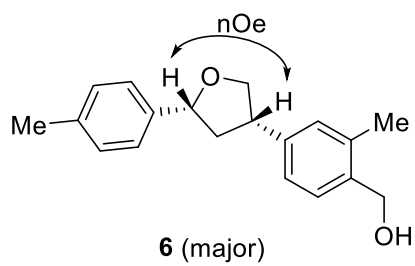

NOESY spectrum of 6 (major) in CDCl<sub>3</sub>

7 <sup>1</sup>H NMR (400M Hz, CDCl<sub>3</sub>)

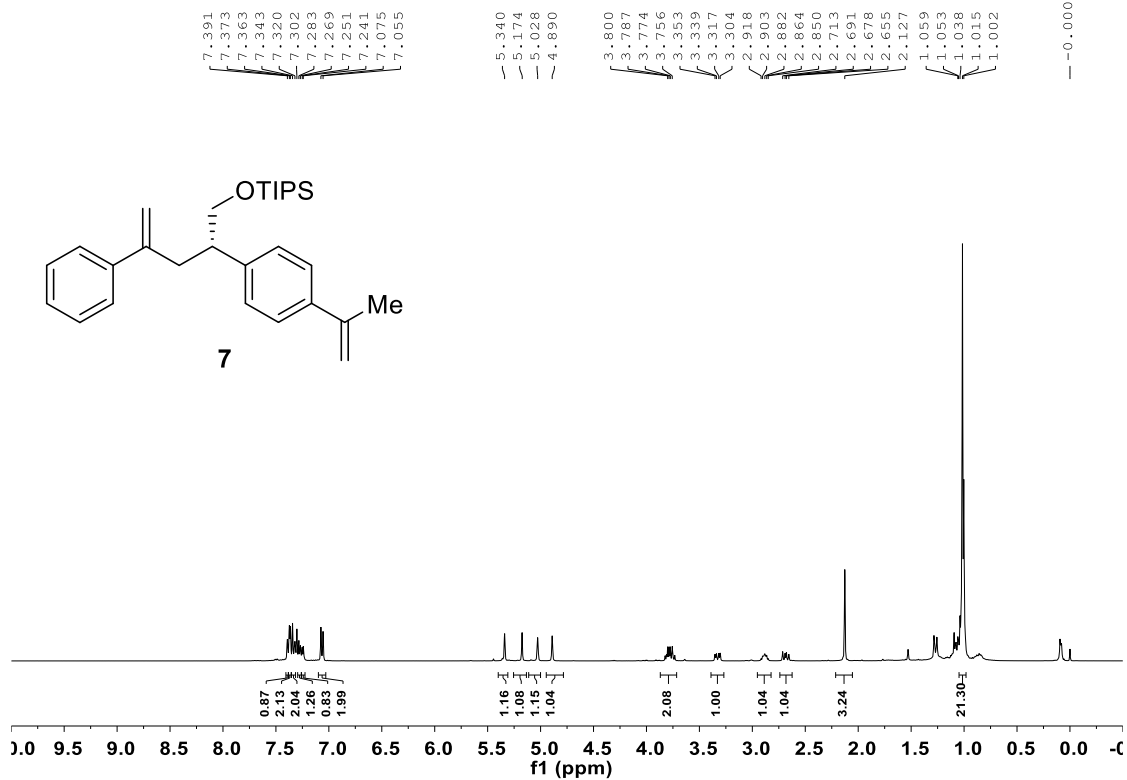

7 <sup>13</sup>C NMR (400M Hz, CDCl<sub>3</sub>)

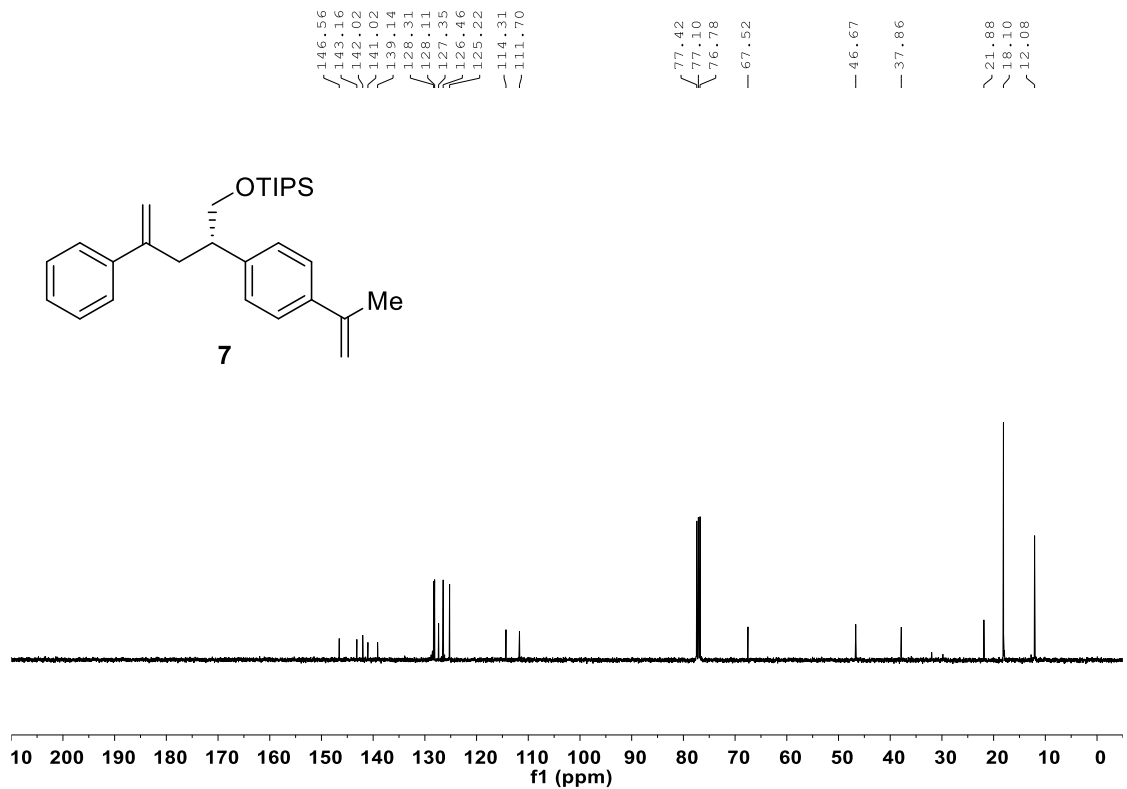

**8**  $^1\text{H}$  NMR (400M Hz,  $\text{CDCl}_3$ )

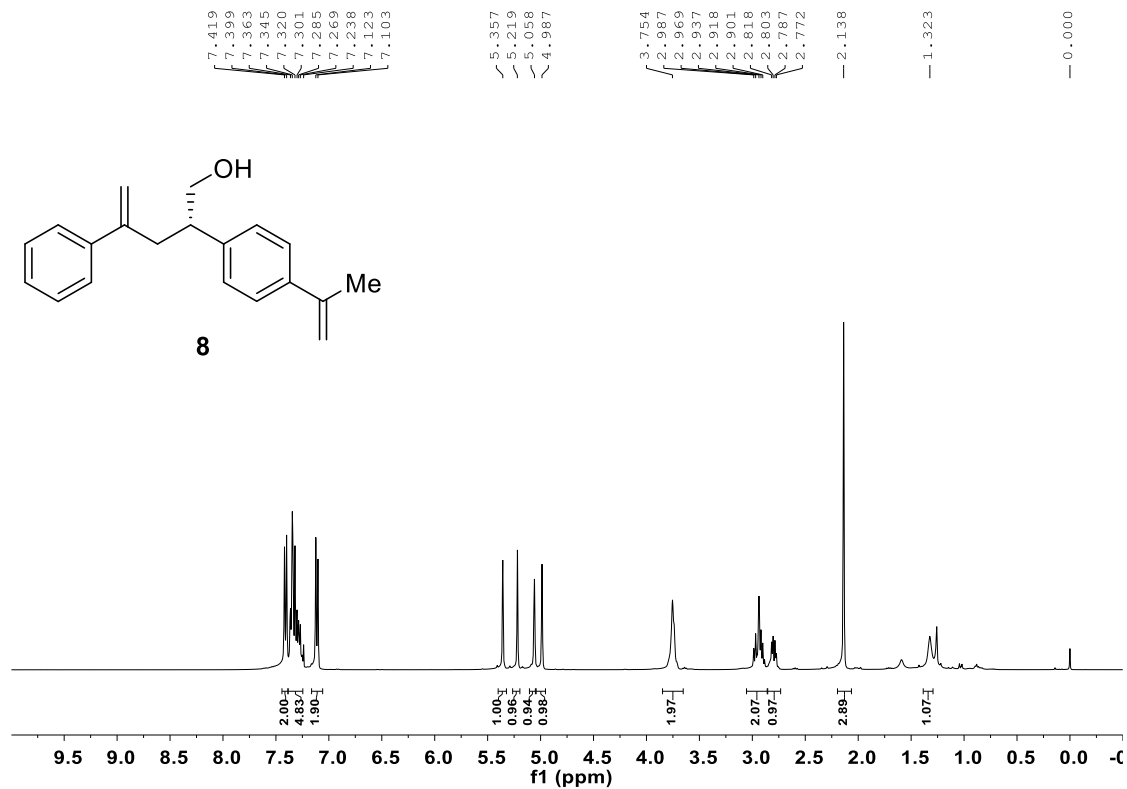

**8**  $^{13}\text{C}$  NMR (400M Hz,  $\text{CDCl}_3$ )

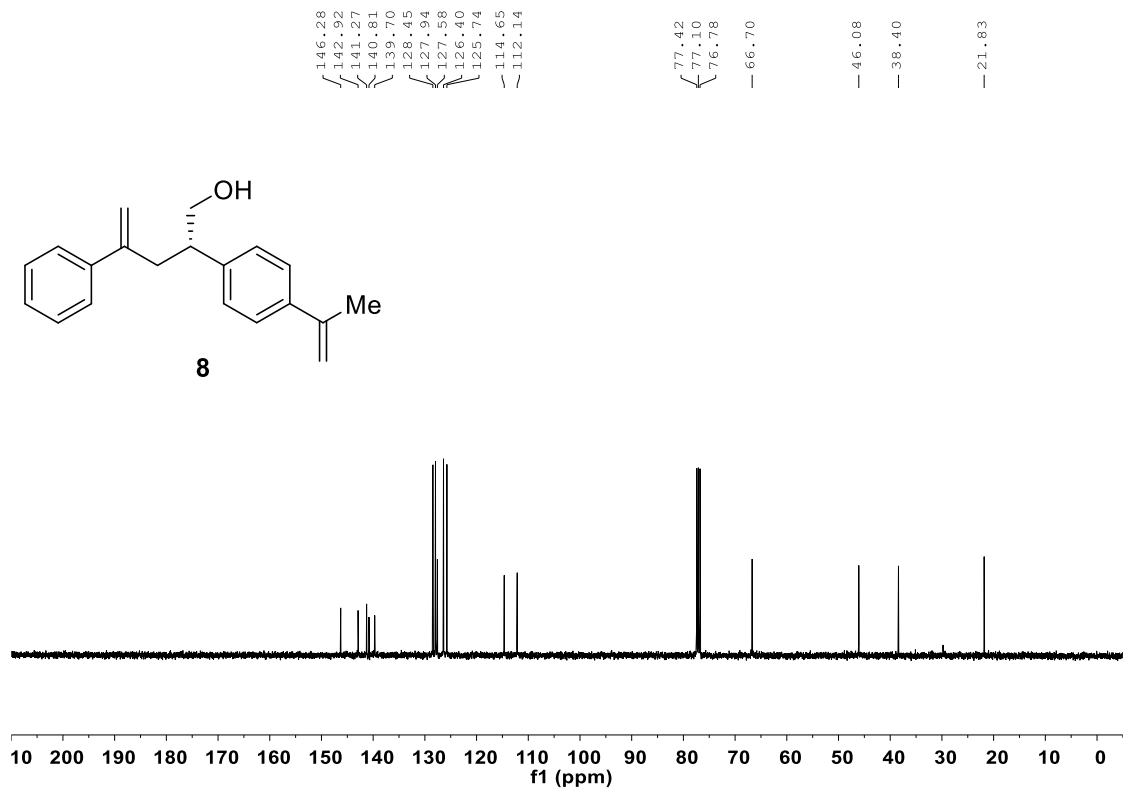

**9** <sup>1</sup>H NMR (400M Hz, CDCl<sub>3</sub>)

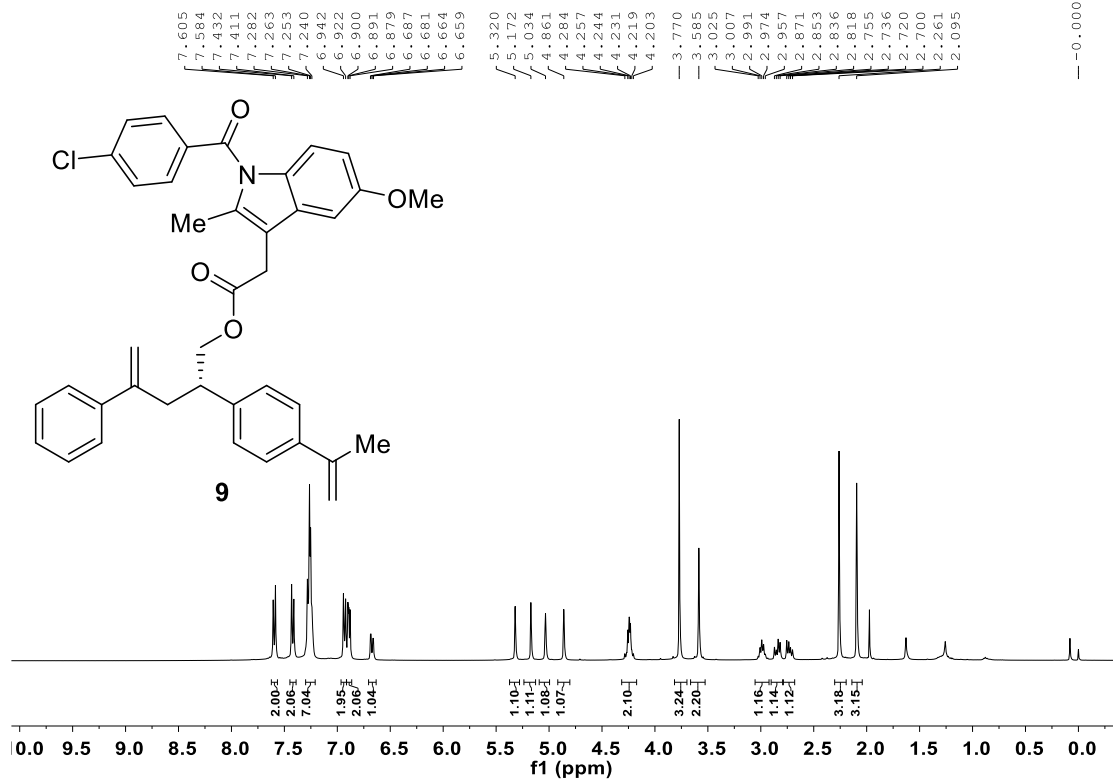

**9** <sup>13</sup>C NMR (400M Hz, CDCl<sub>3</sub>)

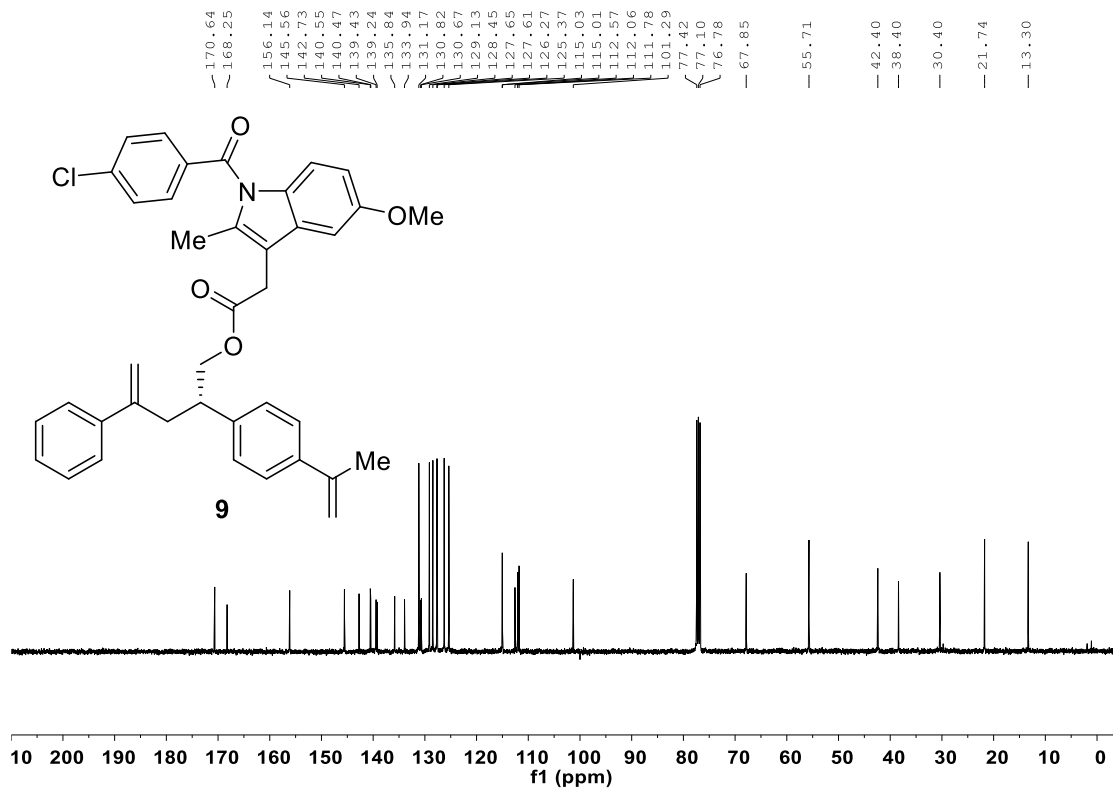

**10** <sup>1</sup>H NMR (400M Hz, CDCl<sub>3</sub>)

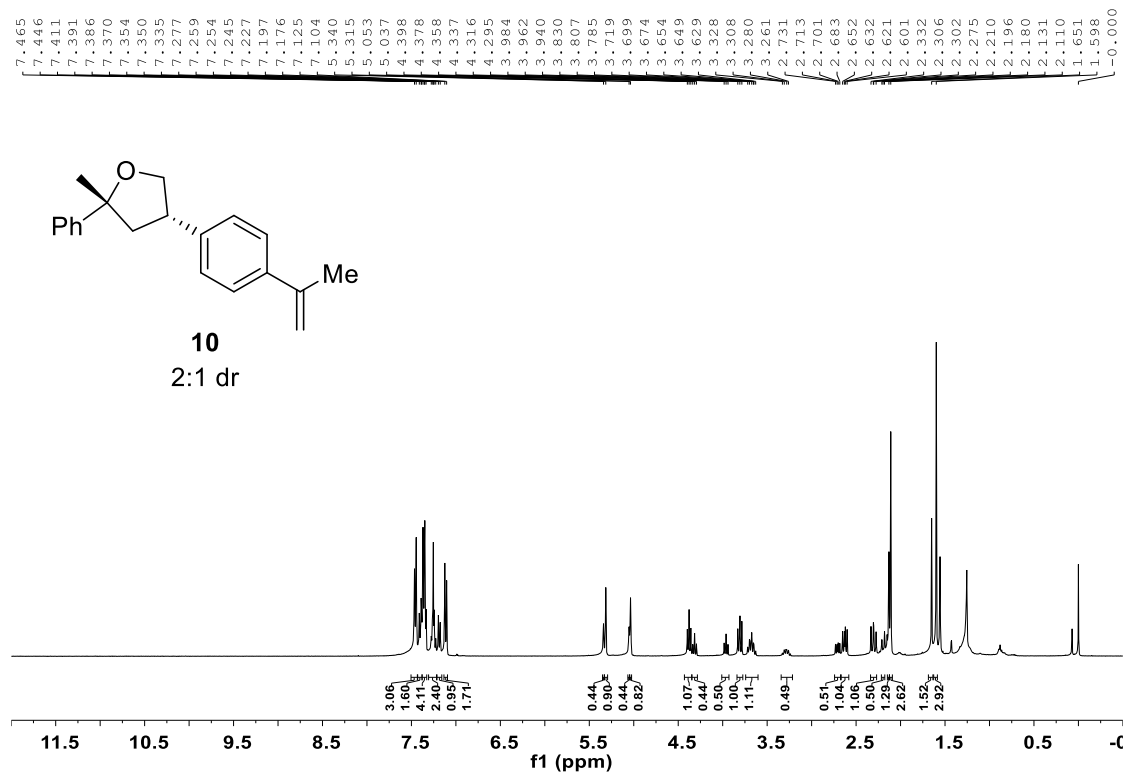

**10** <sup>13</sup>C NMR (400M Hz, CDCl<sub>3</sub>)

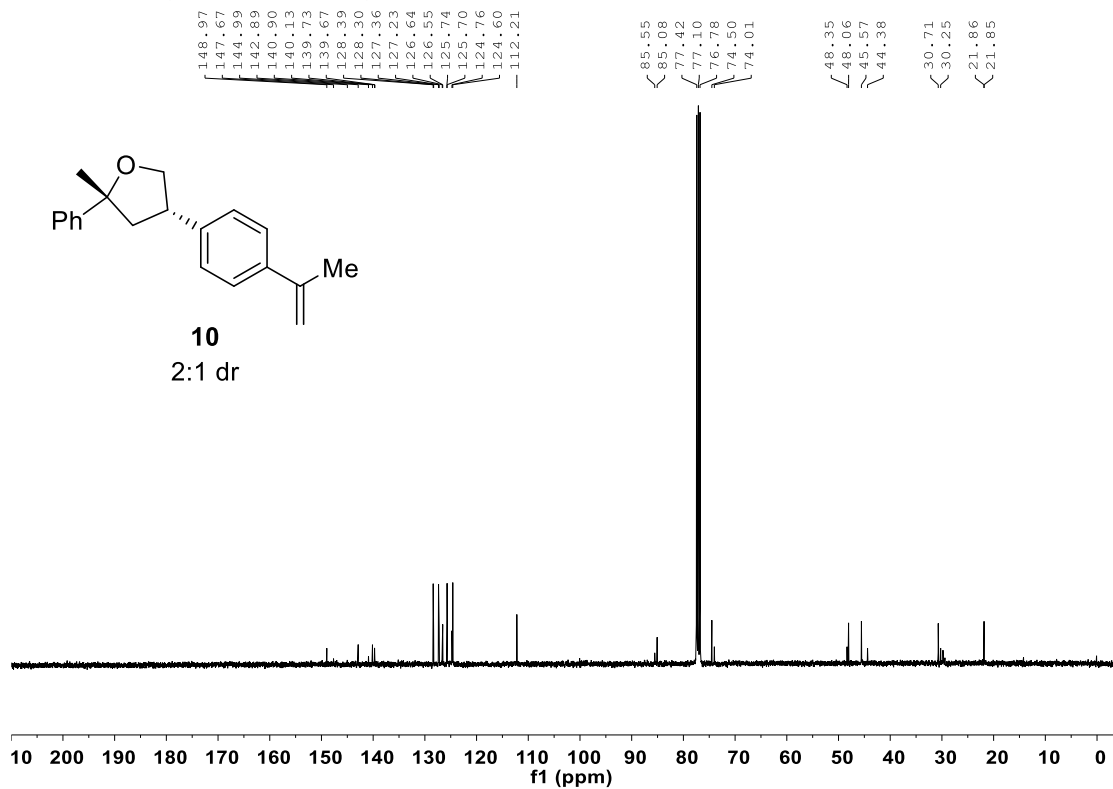

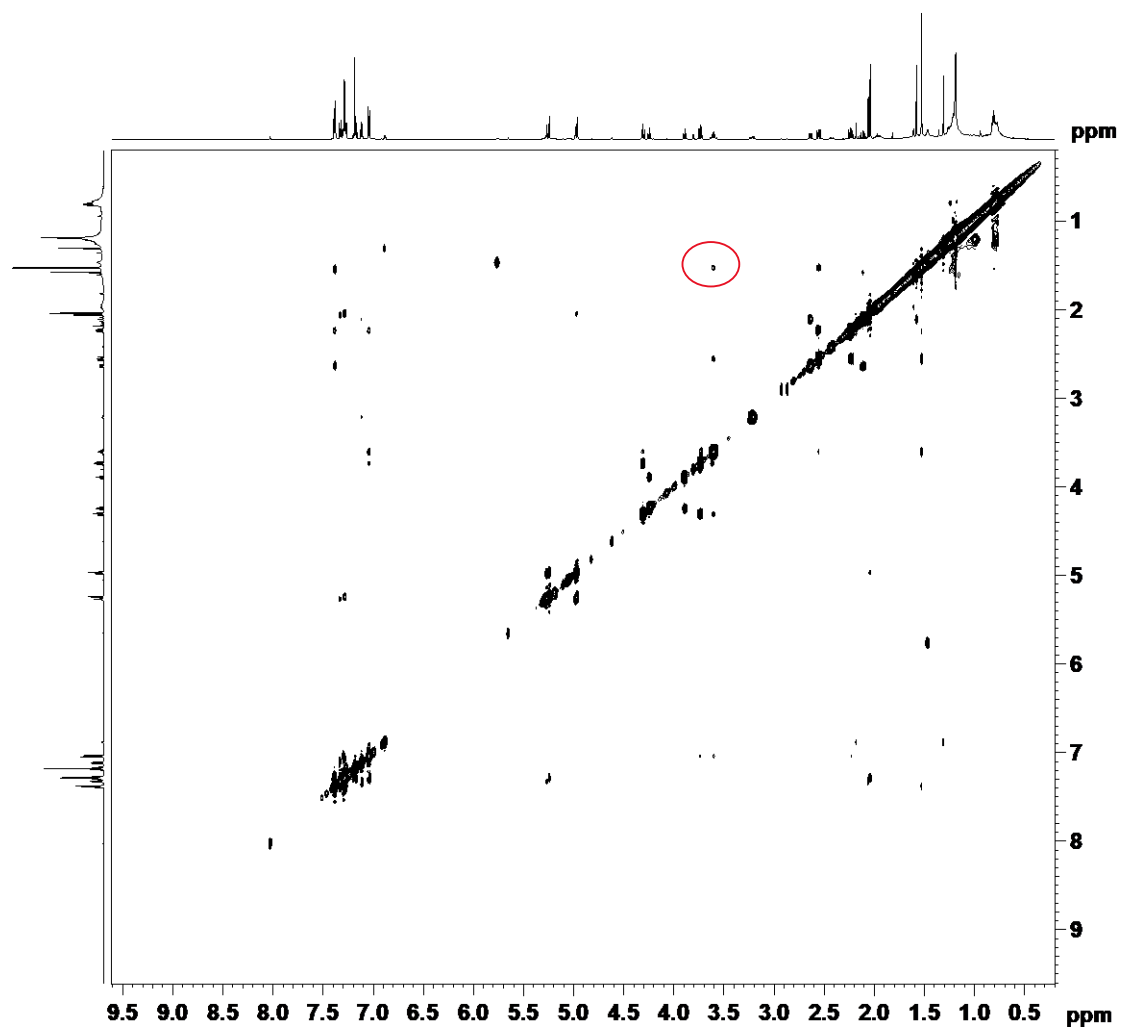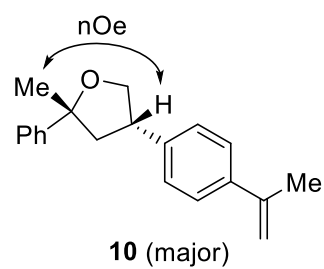

NOESY spectrum of **10** (major) in CDCl<sub>3</sub>

14 <sup>1</sup>H NMR (400M Hz, CDCl<sub>3</sub>)

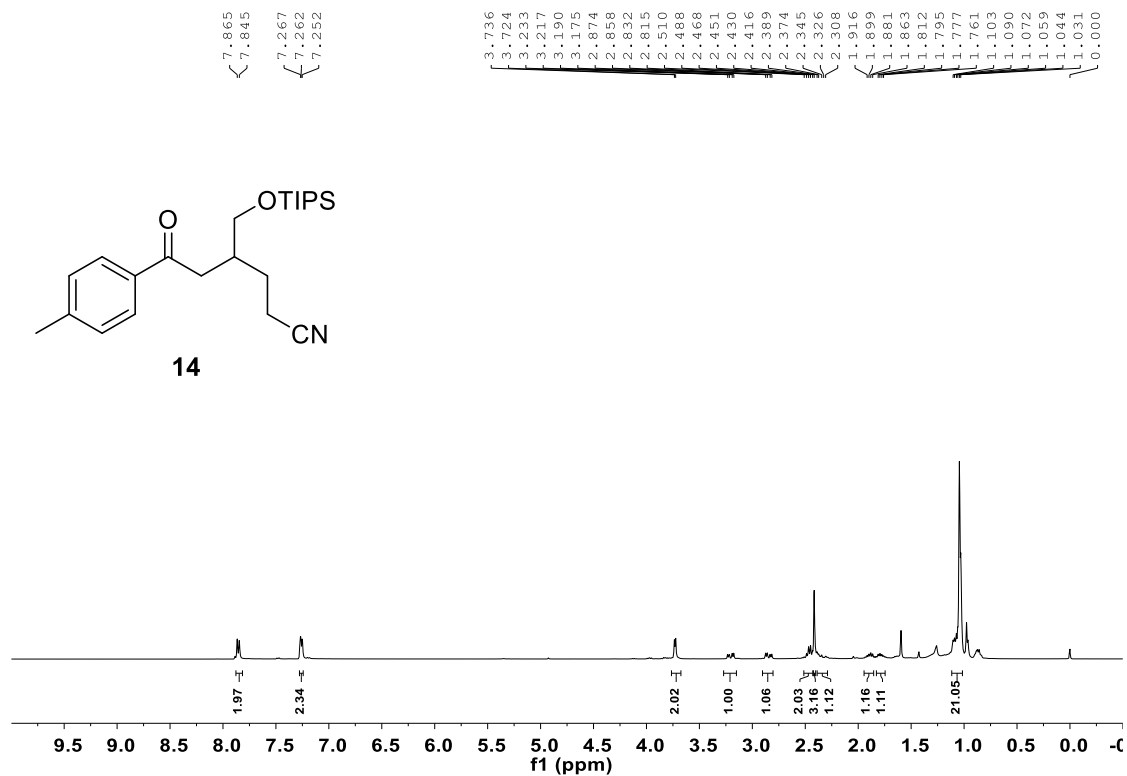

14 <sup>13</sup>C NMR (400M Hz, CDCl<sub>3</sub>)

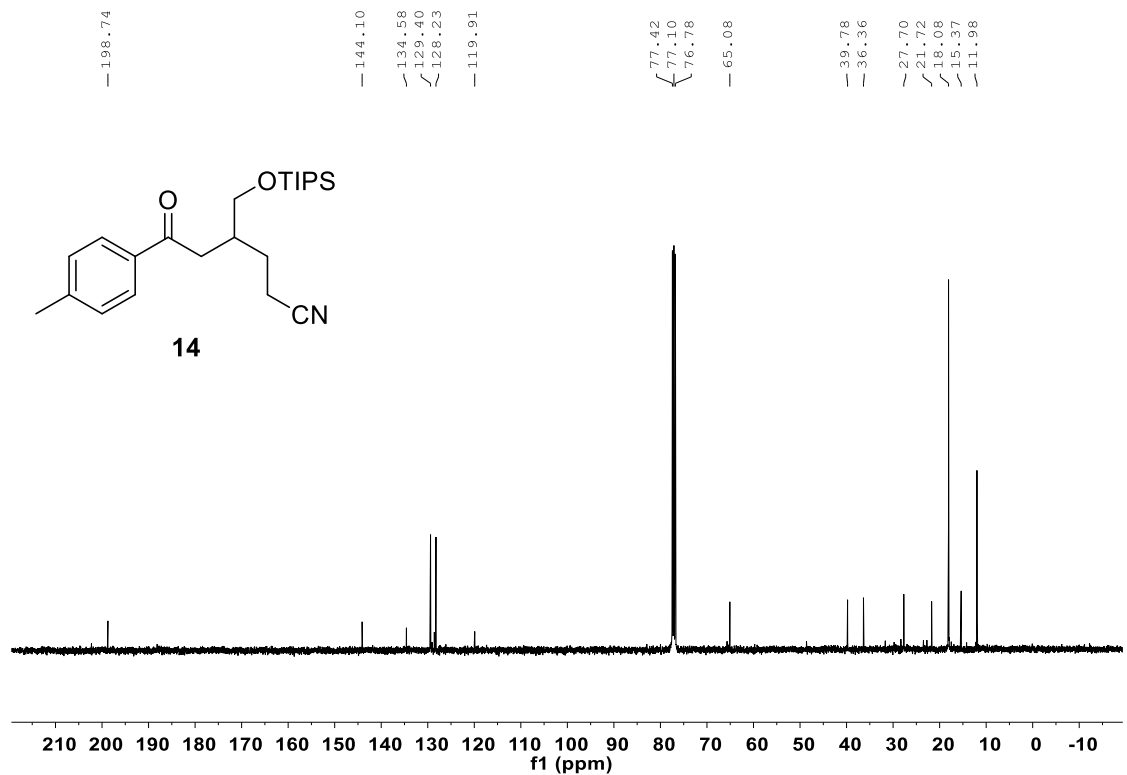

## HPLC Spectra

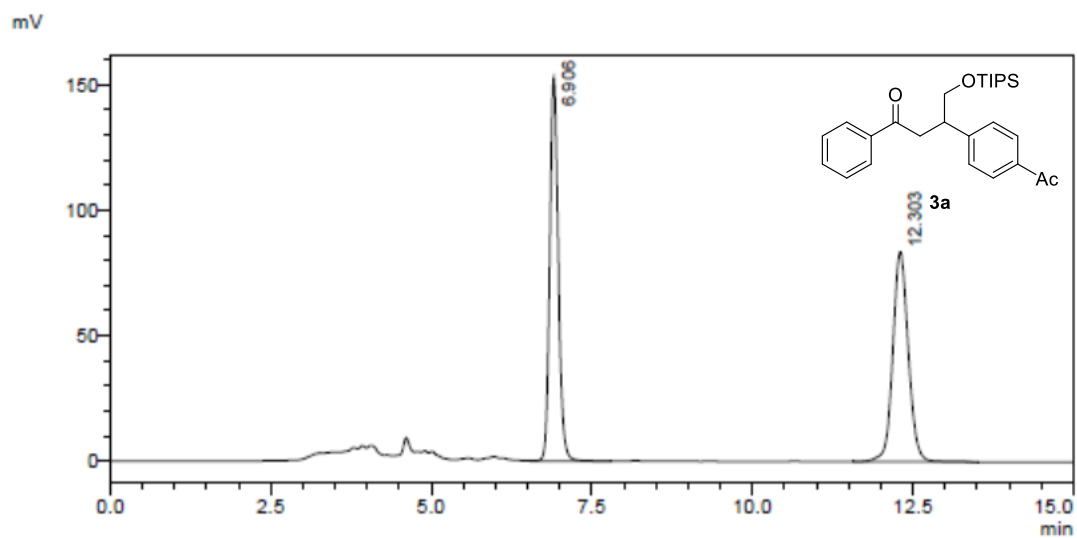

### <Peak Table>

A 254nm

| Peak# | Ret. Time | Area    | Height | Area%   |
|-------|-----------|---------|--------|---------|
| 1     | 6.906     | 1411282 | 152924 | 50.138  |
| 2     | 12.303    | 1403533 | 83621  | 49.862  |
|       |           | 2814815 | 236544 | 100.000 |

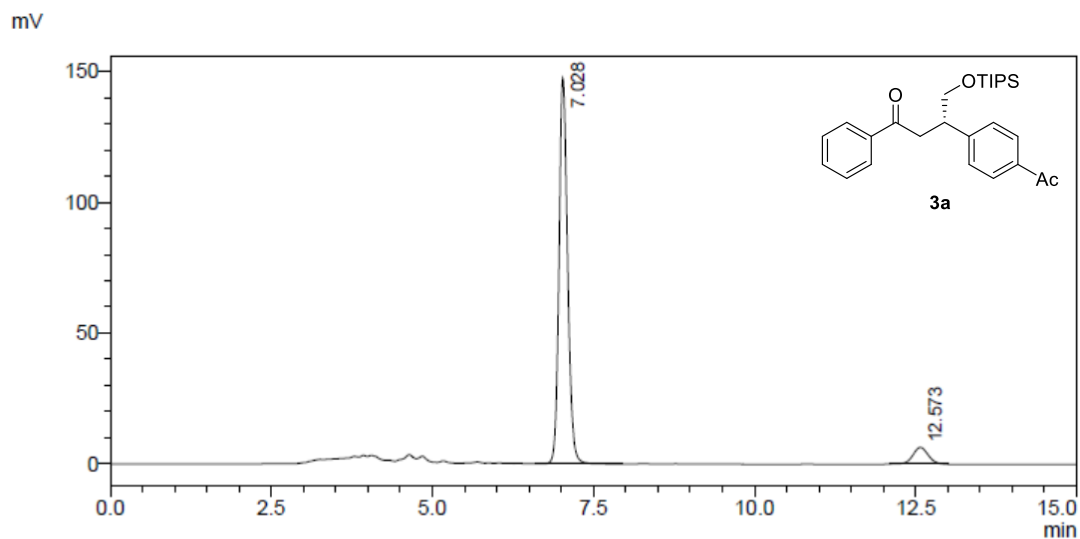

### <Peak Table>

A 254nm

| Peak# | Ret. Time | Area    | Height | Area%   |
|-------|-----------|---------|--------|---------|
| 1     | 7.028     | 1377323 | 147483 | 92.850  |
| 2     | 12.573    | 106055  | 6384   | 7.150   |
|       |           | 1483378 | 153867 | 100.000 |



mV

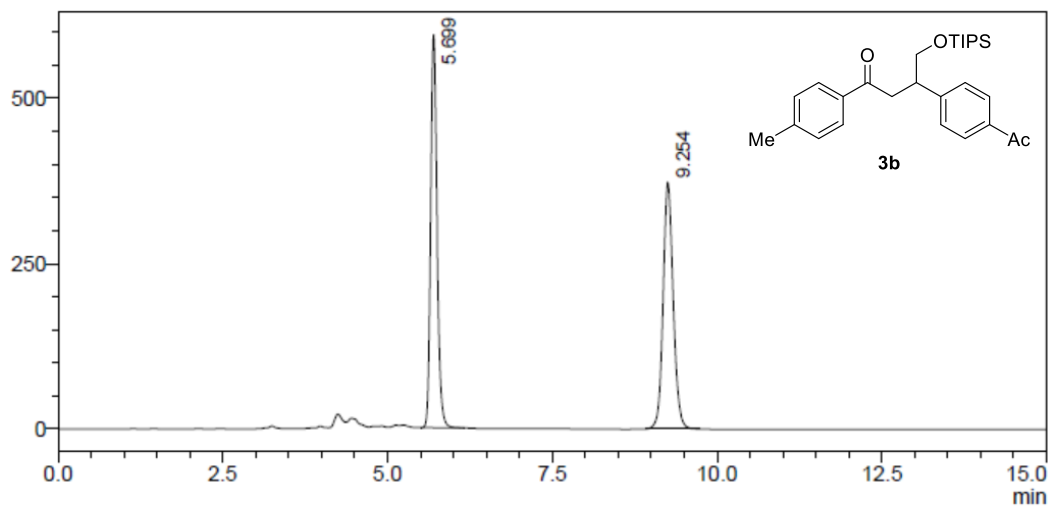

<Peak Table>

A 254nm

| Peak# | Ret. Time | Area    | Height | Area%   |
|-------|-----------|---------|--------|---------|
| 1     | 5.699     | 3998080 | 594602 | 50.048  |
| 2     | 9.254     | 3990412 | 372274 | 49.952  |
|       |           | 7988492 | 966876 | 100.000 |

mV

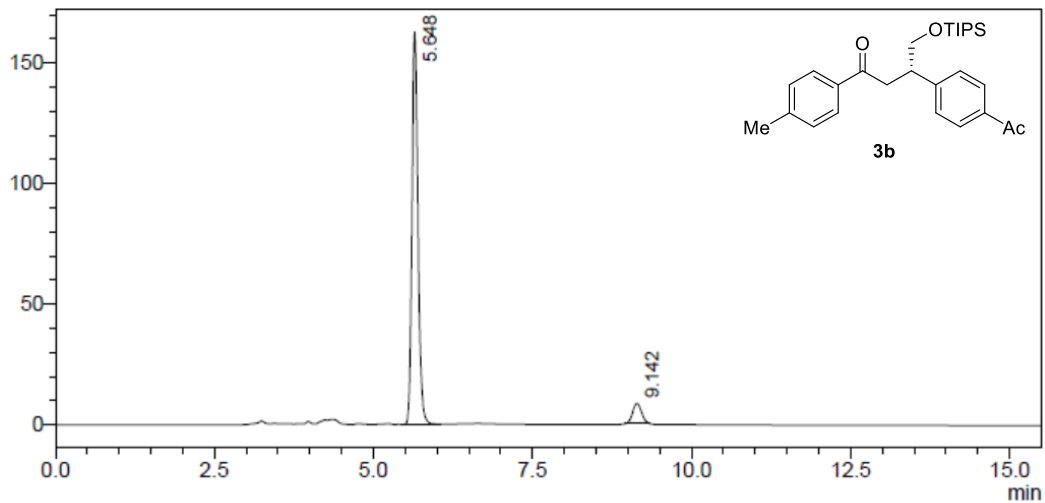

<Peak Table>

A 254nm

| Peak# | Ret. Time | Area    | Height | Area%   |
|-------|-----------|---------|--------|---------|
| 1     | 5.648     | 1071597 | 162996 | 92.857  |
| 2     | 9.142     | 82430   | 8460   | 7.143   |
|       |           | 1154027 | 171456 | 100.000 |

mV

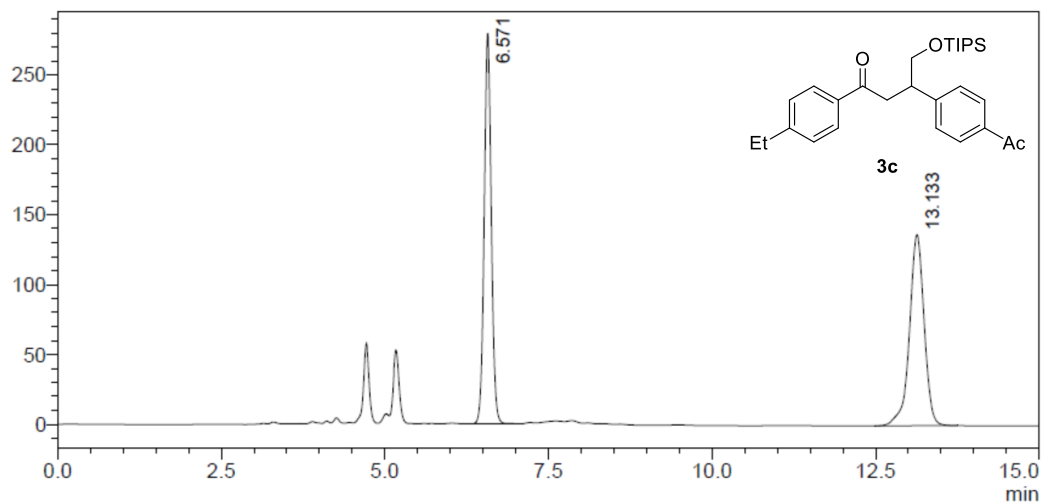

<Peak Table>

A 254nm

| Peak# | Ret. Time | Area    | Height | Area%   |
|-------|-----------|---------|--------|---------|
| 1     | 6.571     | 2136700 | 279067 | 50.012  |
| 2     | 13.133    | 2135677 | 136685 | 49.988  |
|       |           | 4272377 | 415752 | 100.000 |

mV

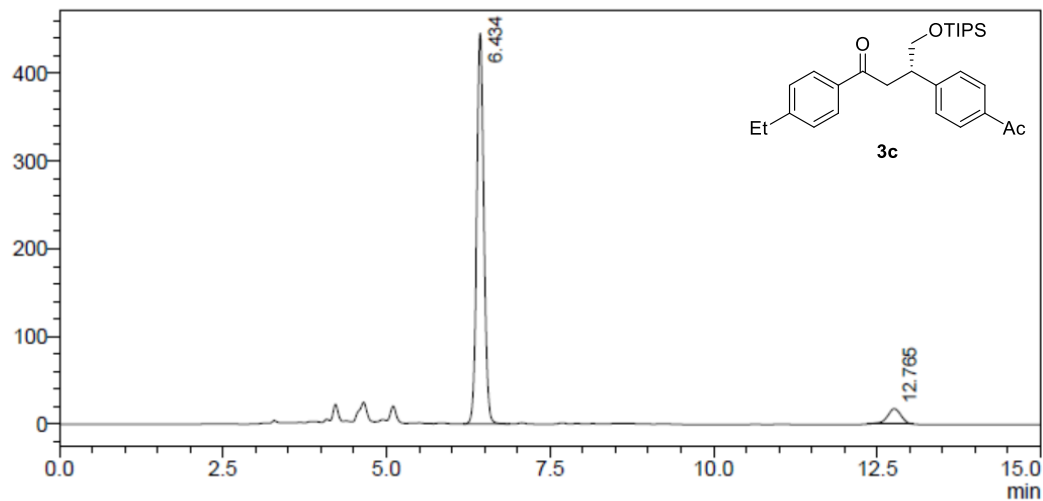

<Peak Table>

A 254nm

| Peak# | Ret. Time | Area    | Height | Area%   |
|-------|-----------|---------|--------|---------|
| 1     | 6.434     | 3368567 | 446185 | 92.939  |
| 2     | 12.765    | 255920  | 17457  | 7.061   |
|       |           | 3624487 | 463642 | 100.000 |

mV

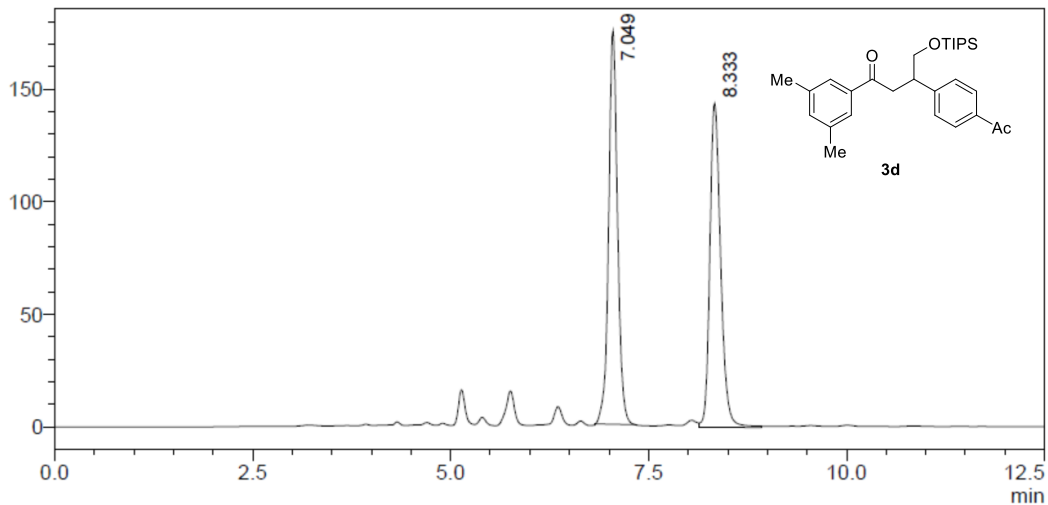

<Peak Table>

A 254nm

| Peak# | Ret. Time | Area    | Height | Area%   |
|-------|-----------|---------|--------|---------|
| 1     | 7.049     | 1370082 | 174856 | 50.045  |
| 2     | 8.333     | 1367612 | 143885 | 49.955  |
|       |           | 2737693 | 318741 | 100.000 |

mV

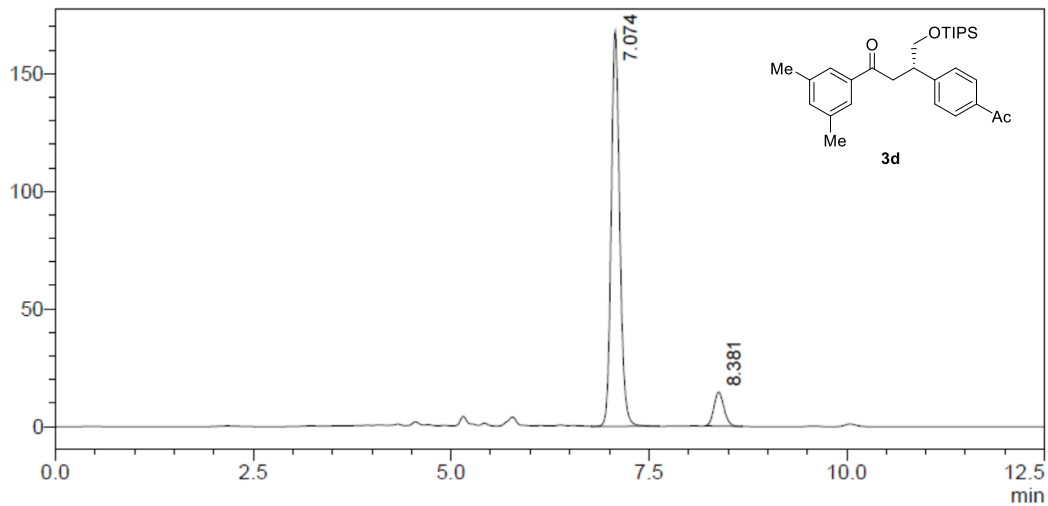

<Peak Table>

A 254nm

| Peak# | Ret. Time | Area    | Height | Area%   |
|-------|-----------|---------|--------|---------|
| 1     | 7.074     | 1262057 | 167922 | 90.749  |
| 2     | 8.381     | 128652  | 14490  | 9.251   |
|       |           | 1390709 | 182412 | 100.000 |

mV

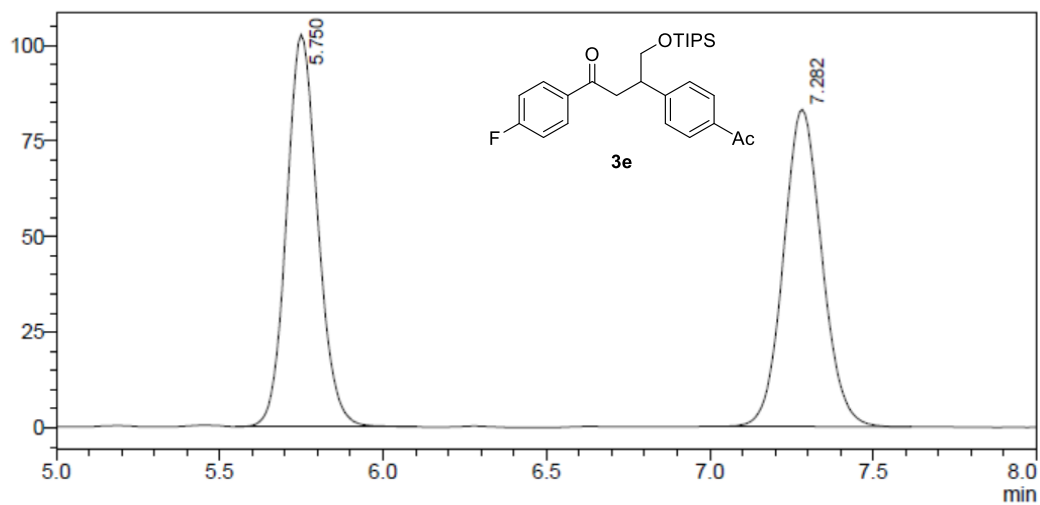

<Peak Table>

| Peak# | Ret. Time | Area    | Height | Area%   |
|-------|-----------|---------|--------|---------|
| 1     | 5.750     | 681451  | 102523 | 50.061  |
| 2     | 7.282     | 679786  | 82951  | 49.939  |
|       |           | 1361237 | 185474 | 100.000 |

mV

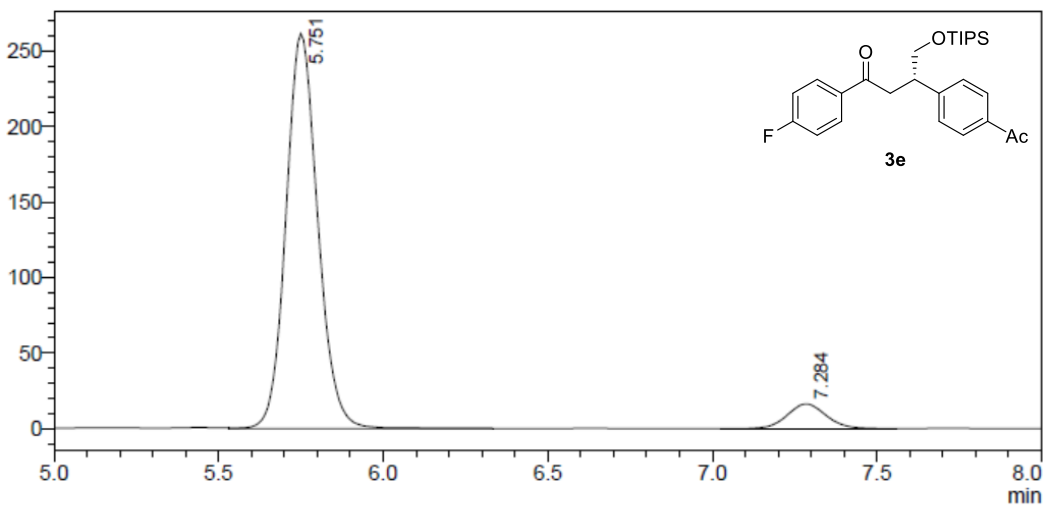

<Peak Table>

| Peak# | Ret. Time | Area    | Height | Area%   |
|-------|-----------|---------|--------|---------|
| 1     | 5.751     | 1759202 | 261762 | 92.923  |
| 2     | 7.284     | 133982  | 16308  | 7.077   |
|       |           | 1893184 | 278070 | 100.000 |

mV

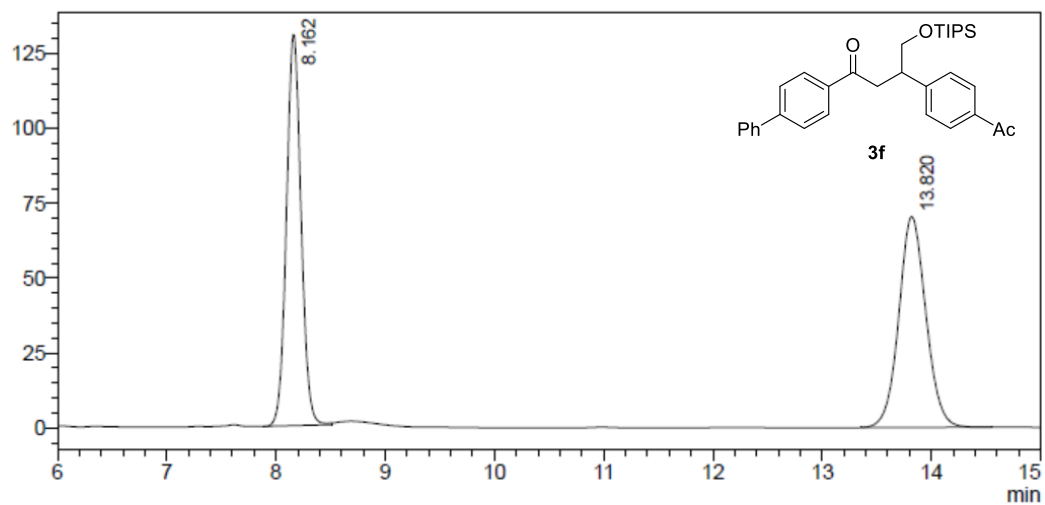

<Peak Table>

A 254nm

| Peak# | Ret. Time | Area    | Height | Area%   |
|-------|-----------|---------|--------|---------|
| 1     | 8.162     | 1219362 | 130718 | 50.055  |
| 2     | 13.820    | 1216700 | 70404  | 49.945  |
|       |           | 2436062 | 201123 | 100.000 |

mV

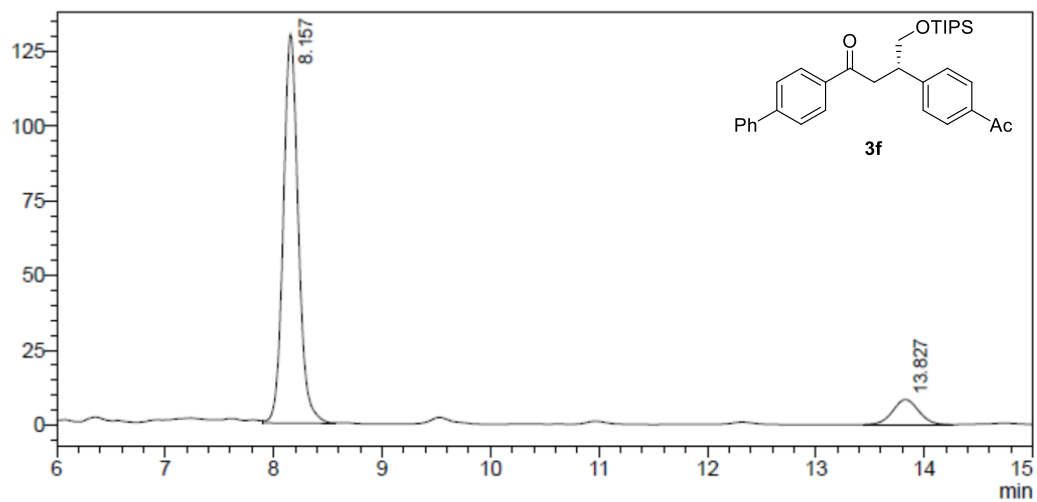

<Peak Table>

A 254nm

| Peak# | Ret. Time | Area    | Height | Area%   |
|-------|-----------|---------|--------|---------|
| 1     | 8.157     | 1250010 | 130328 | 89.977  |
| 2     | 13.827    | 139248  | 8378   | 10.023  |
|       |           | 1389257 | 138706 | 100.000 |

mV

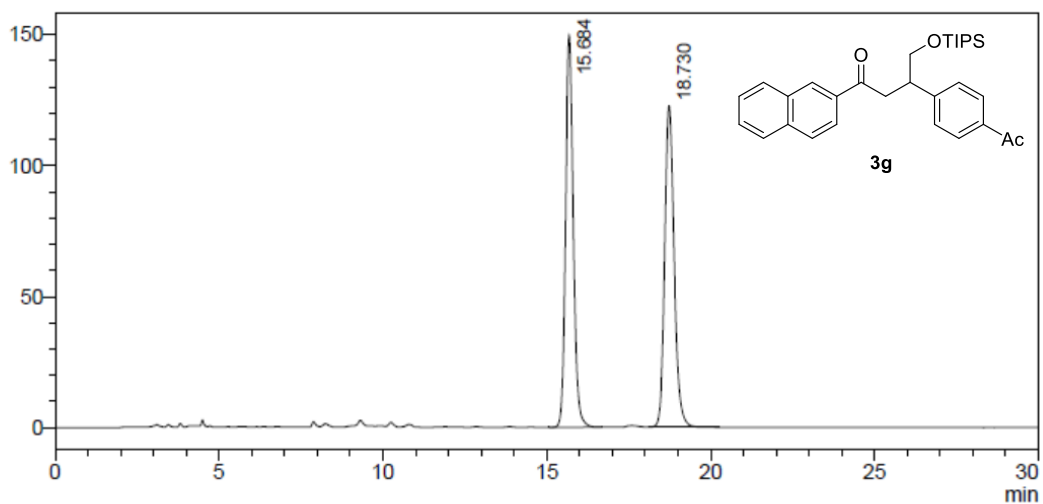

<Peak Table>

A 254nm

| Peak# | Ret. Time | Area    | Height | Area%   |
|-------|-----------|---------|--------|---------|
| 1     | 15.684    | 2460240 | 149695 | 49.930  |
| 2     | 18.730    | 2467142 | 122746 | 50.070  |
|       |           | 4927382 | 272441 | 100.000 |

mV

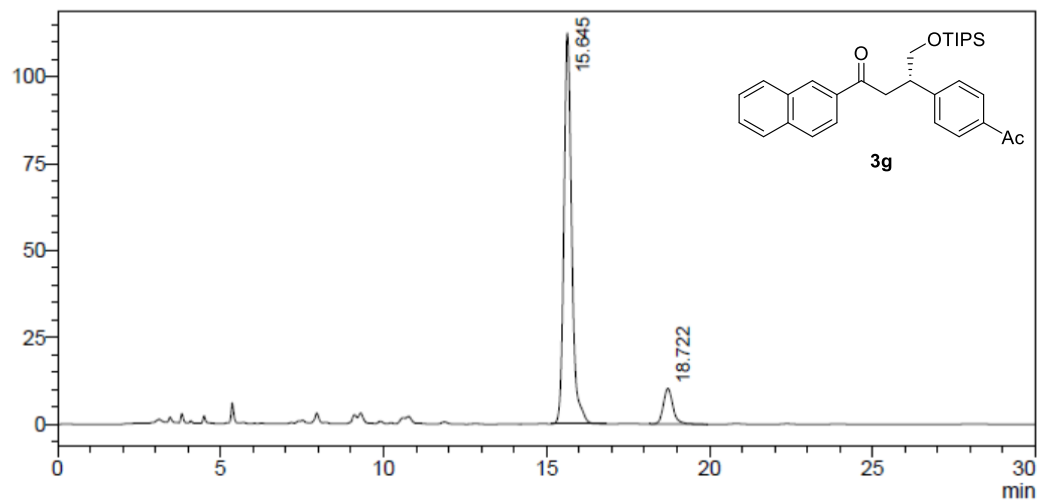

<Peak Table>

A 254nm

| Peak# | Ret. Time | Area    | Height | Area%   |
|-------|-----------|---------|--------|---------|
| 1     | 15.645    | 1889014 | 112457 | 89.992  |
| 2     | 18.722    | 210087  | 10245  | 10.008  |
|       |           | 2099101 | 122702 | 100.000 |

mV

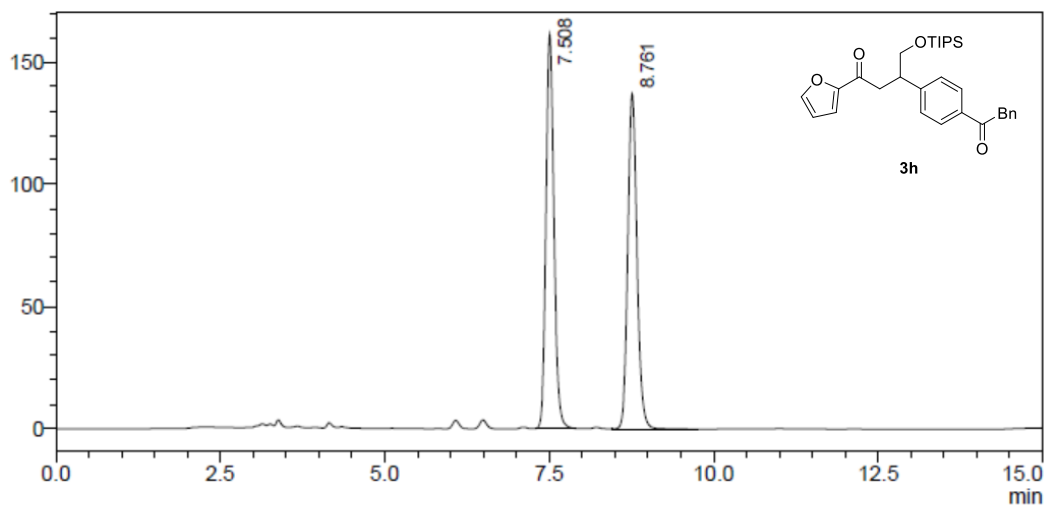

<Peak Table>

A 254nm

| Peak# | Ret. Time | Area    | Height | Area%   |
|-------|-----------|---------|--------|---------|
| 1     | 7.508     | 1347702 | 161043 | 50.253  |
| 2     | 8.761     | 1334117 | 137008 | 49.747  |
|       |           | 2681819 | 298051 | 100.000 |

mV

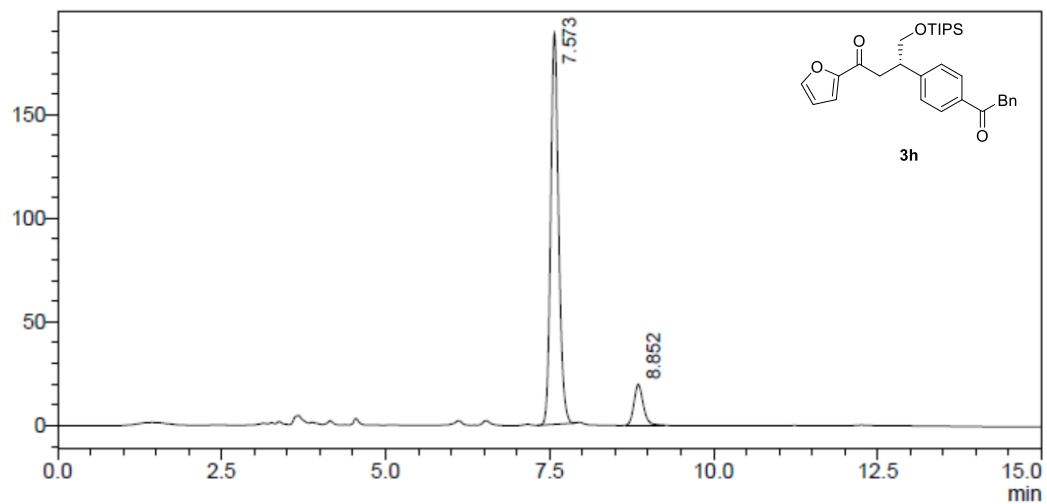

<Peak Table>

A 254nm

| Peak# | Ret. Time | Area    | Height | Area%   |
|-------|-----------|---------|--------|---------|
| 1     | 7.573     | 1597567 | 188499 | 89.092  |
| 2     | 8.852     | 195597  | 19778  | 10.908  |
|       |           | 1793164 | 208277 | 100.000 |

mV

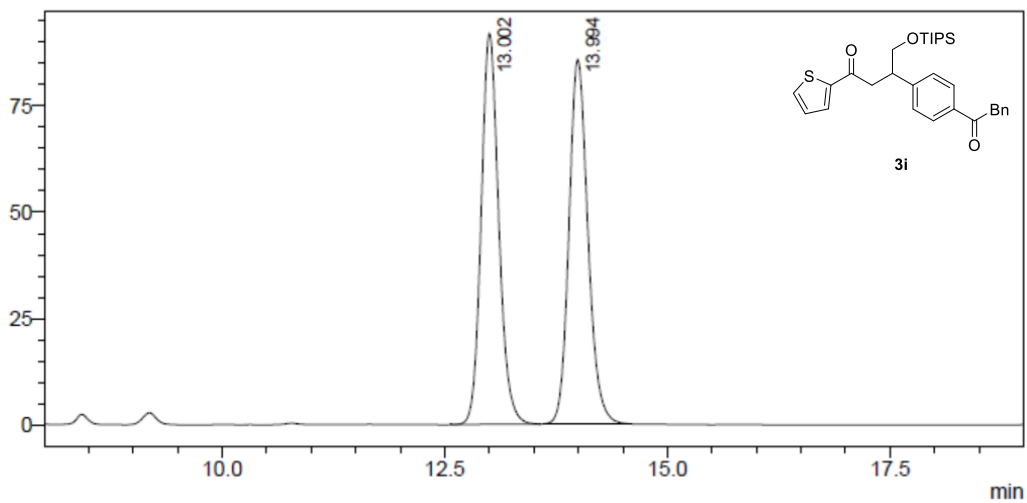

<Peak Table>

A 254nm

| Peak# | Ret. Time | Area    | Height | Area%   |
|-------|-----------|---------|--------|---------|
| 1     | 13.002    | 1260392 | 91845  | 49.841  |
| 2     | 13.994    | 1268417 | 85551  | 50.159  |
|       |           | 2528809 | 177395 | 100.000 |

mV

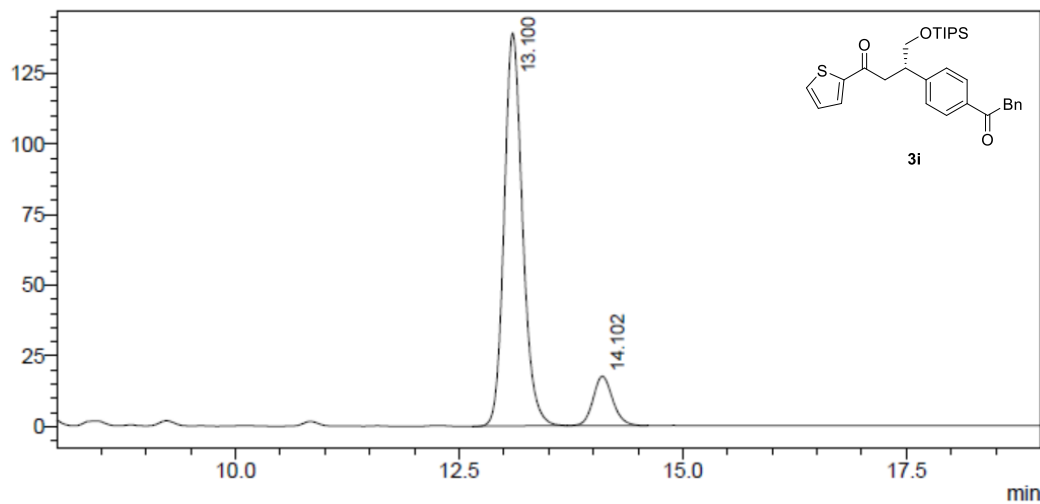

<Peak Table>

A 254nm

| Peak# | Ret. Time | Area    | Height | Area%   |
|-------|-----------|---------|--------|---------|
| 1     | 13.100    | 1989344 | 139090 | 88.173  |
| 2     | 14.102    | 266850  | 17455  | 11.827  |
|       |           | 2256195 | 156545 | 100.000 |



mV

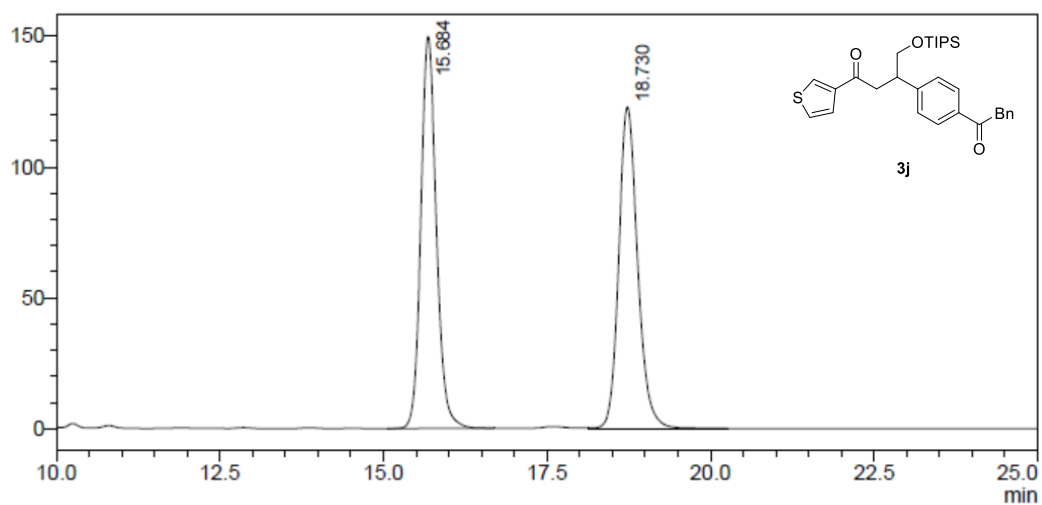

<Peak Table>

A 254nm

| Peak# | Ret. Time | Area    | Height | Area%   |
|-------|-----------|---------|--------|---------|
| 1     | 15.684    | 2460240 | 149695 | 49.930  |
| 2     | 18.730    | 2467142 | 122746 | 50.070  |
|       |           | 4927382 | 272441 | 100.000 |

mV

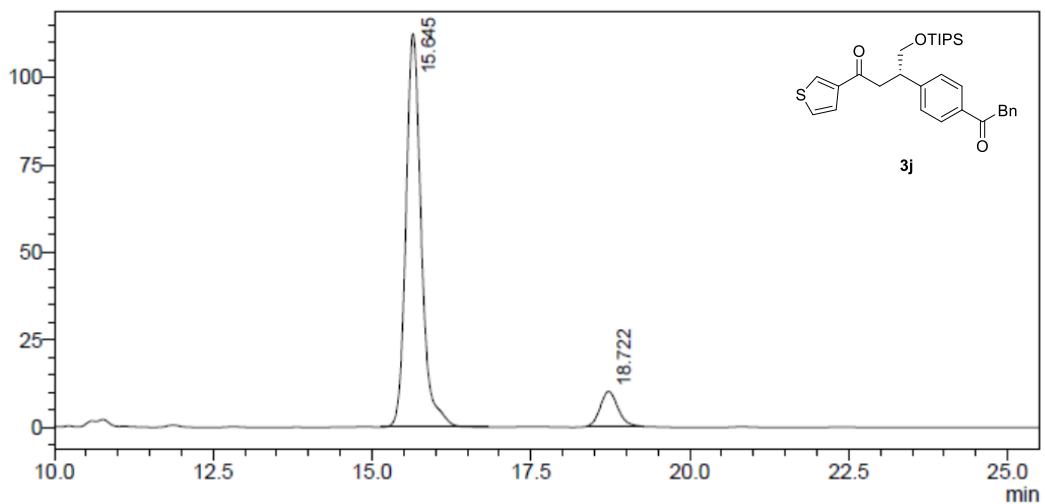

<Peak Table>

A 254nm

| Peak# | Ret. Time | Area    | Height | Area%   |
|-------|-----------|---------|--------|---------|
| 1     | 15.645    | 1889014 | 112457 | 90.770  |
| 2     | 18.722    | 192095  | 9978   | 9.230   |
|       |           | 2081109 | 122434 | 100.000 |

mV

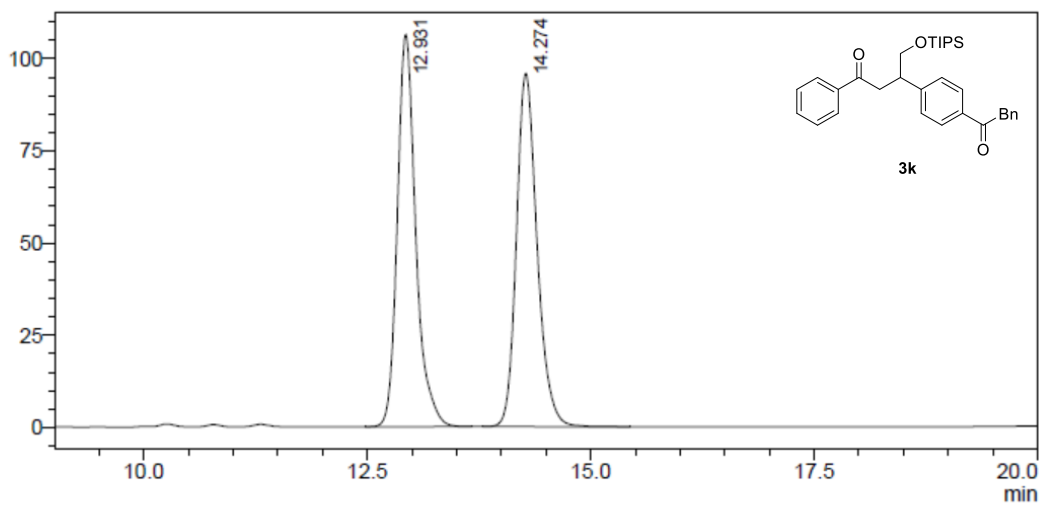

<Peak Table>

A 254nm

| Peak# | Ret. Time | Area    | Height | Area%   |
|-------|-----------|---------|--------|---------|
| 1     | 12.931    | 1529006 | 106327 | 49.850  |
| 2     | 14.274    | 1538216 | 95752  | 50.150  |
|       |           | 3067221 | 202078 | 100.000 |

mV

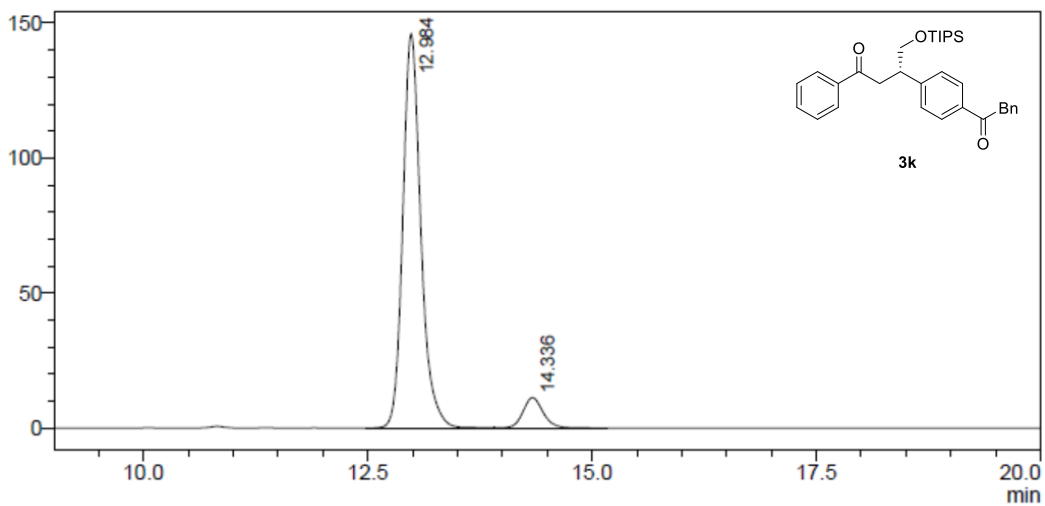

<Peak Table>

A 254nm

| Peak# | Ret. Time | Area    | Height | Area%   |
|-------|-----------|---------|--------|---------|
| 1     | 12.984    | 2045177 | 145965 | 92.088  |
| 2     | 14.336    | 175717  | 11241  | 7.912   |
|       |           | 2220894 | 157206 | 100.000 |

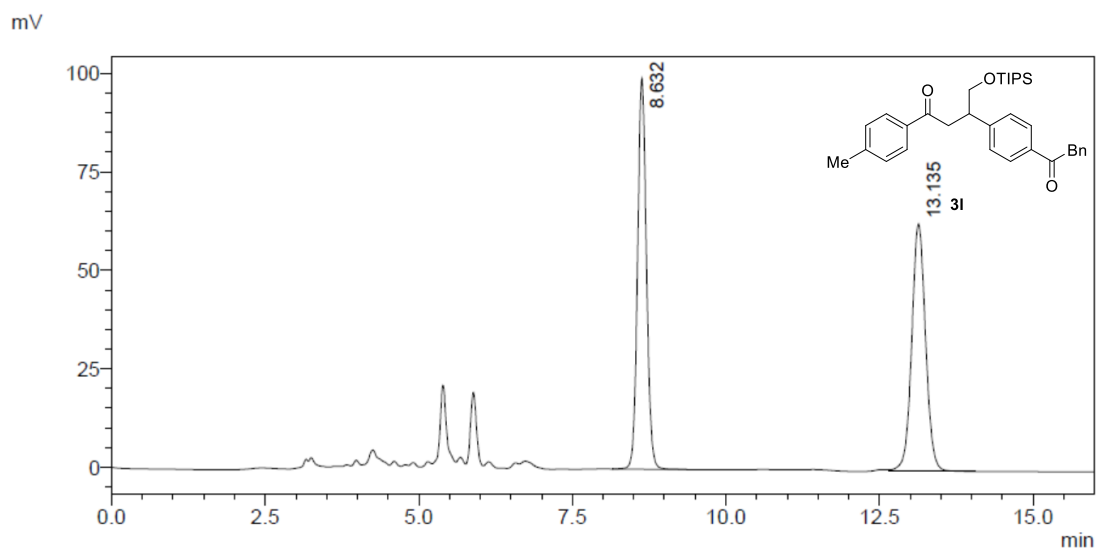

<Peak Table>

A 254nm

| Peak# | Ret. Time | Area    | Height | Area%   |
|-------|-----------|---------|--------|---------|
| 1     | 8.632     | 999240  | 99095  | 50.197  |
| 2     | 13.135    | 991407  | 62829  | 49.803  |
|       |           | 1990647 | 161924 | 100.000 |

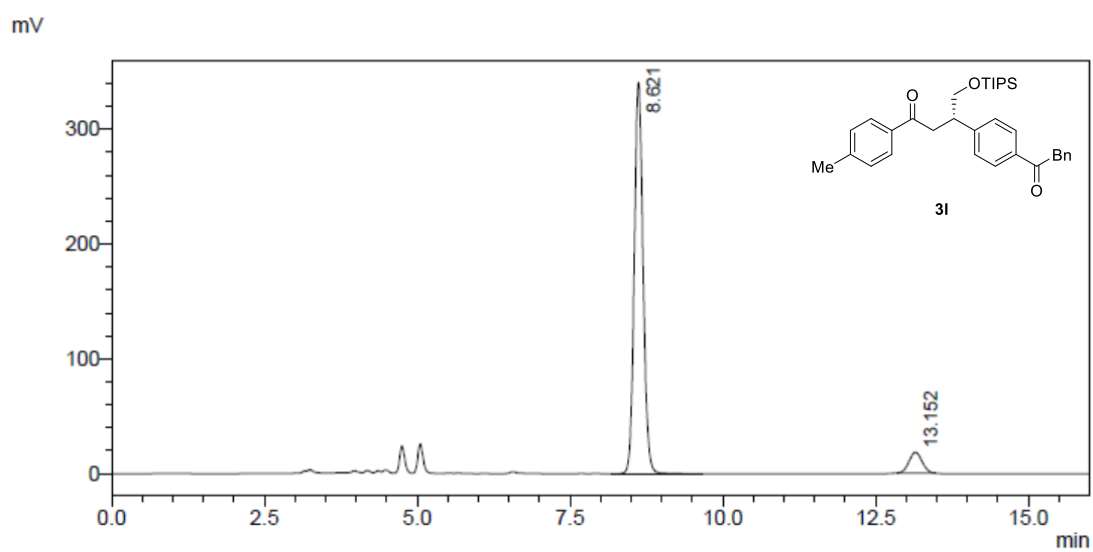

<Peak Table>

A 254nm

| Peak# | Ret. Time | Area    | Height | Area%   |
|-------|-----------|---------|--------|---------|
| 1     | 8.621     | 3426692 | 340552 | 92.736  |
| 2     | 13.152    | 268428  | 18038  | 7.264   |
|       |           | 3695120 | 358591 | 100.000 |

mV

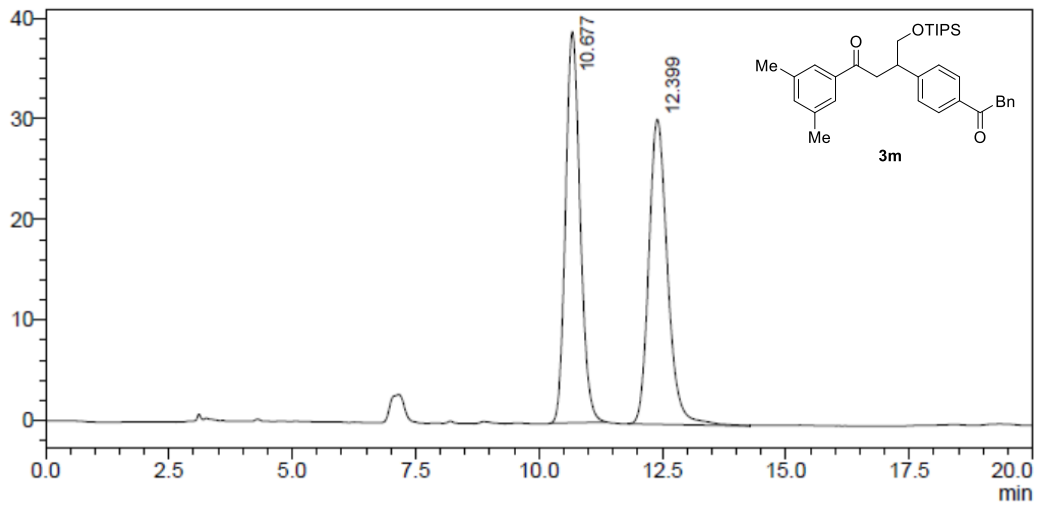

<Peak Table>

A 254nm

| Peak# | Ret. Time | Area    | Height | Area%   |
|-------|-----------|---------|--------|---------|
| 1     | 10.677    | 799080  | 38864  | 49.977  |
| 2     | 12.399    | 799801  | 30283  | 50.023  |
|       |           | 1598881 | 69147  | 100.000 |

mV

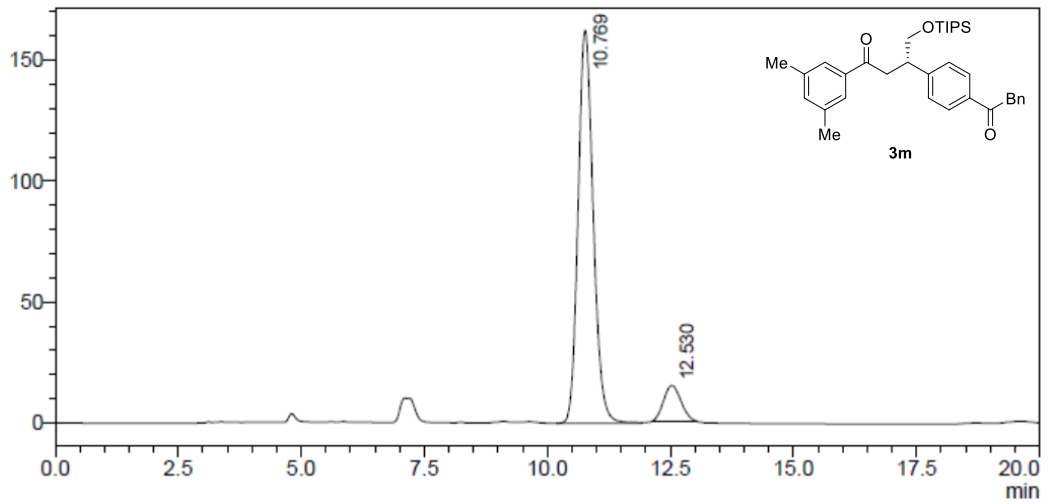

<Peak Table>

A 254nm

| Peak# | Ret. Time | Area    | Height | Area%   |
|-------|-----------|---------|--------|---------|
| 1     | 10.769    | 3486080 | 162510 | 90.611  |
| 2     | 12.530    | 361210  | 14768  | 9.389   |
|       |           | 3847290 | 177279 | 100.000 |

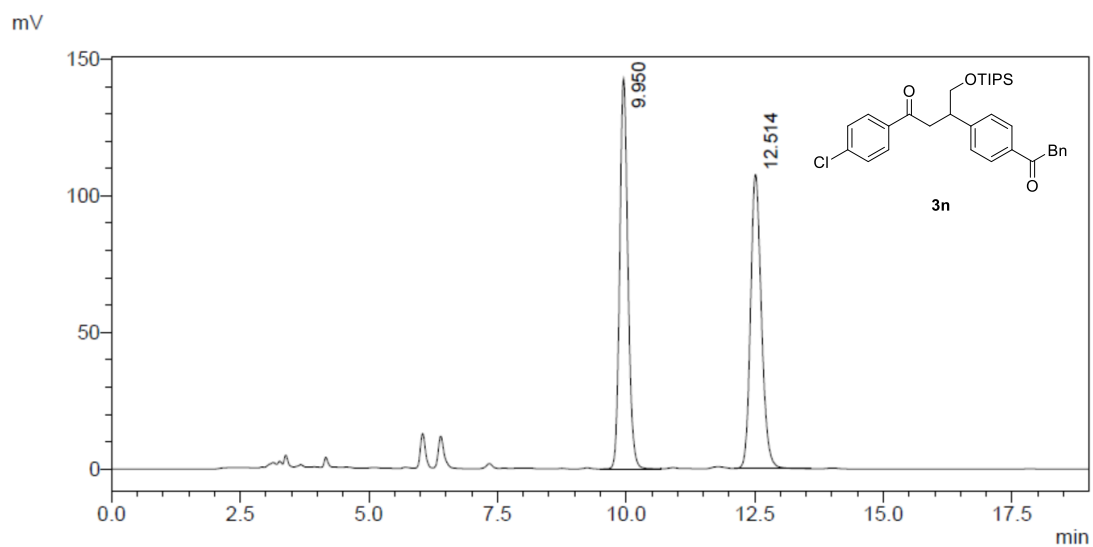

<Peak Table>

A 254nm

| Peak# | Ret. Time | Area    | Height | Area%   |
|-------|-----------|---------|--------|---------|
| 1     | 9.950     | 1591809 | 142938 | 50.036  |
| 2     | 12.514    | 1589503 | 107741 | 49.964  |
|       |           | 3181312 | 250679 | 100.000 |

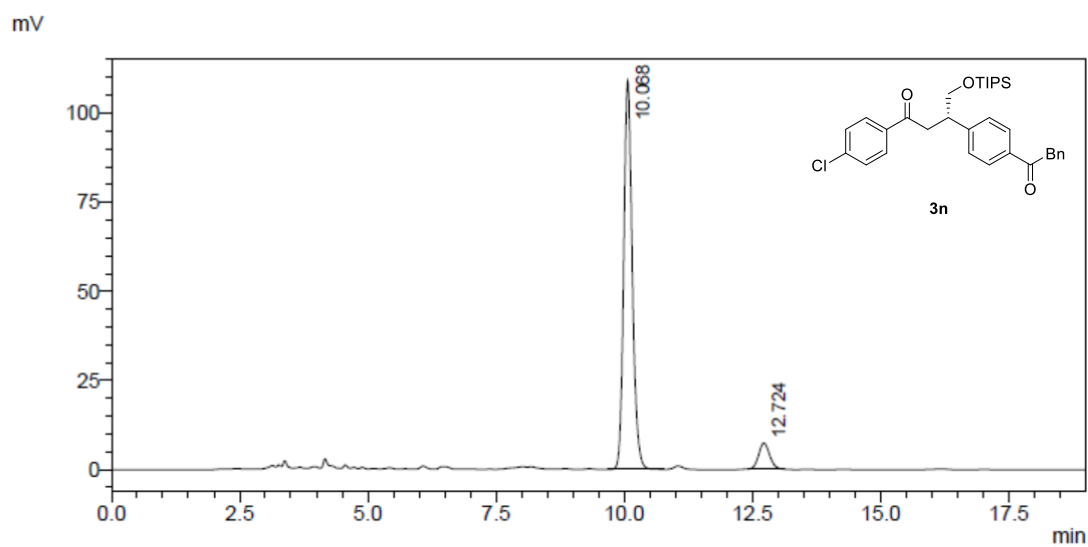

<Peak Table>

A 254nm

| Peak# | Ret. Time | Area    | Height | Area%   |
|-------|-----------|---------|--------|---------|
| 1     | 10.068    | 1268757 | 109046 | 92.085  |
| 2     | 12.724    | 109059  | 7313   | 7.915   |
|       |           | 1377817 | 116359 | 100.000 |

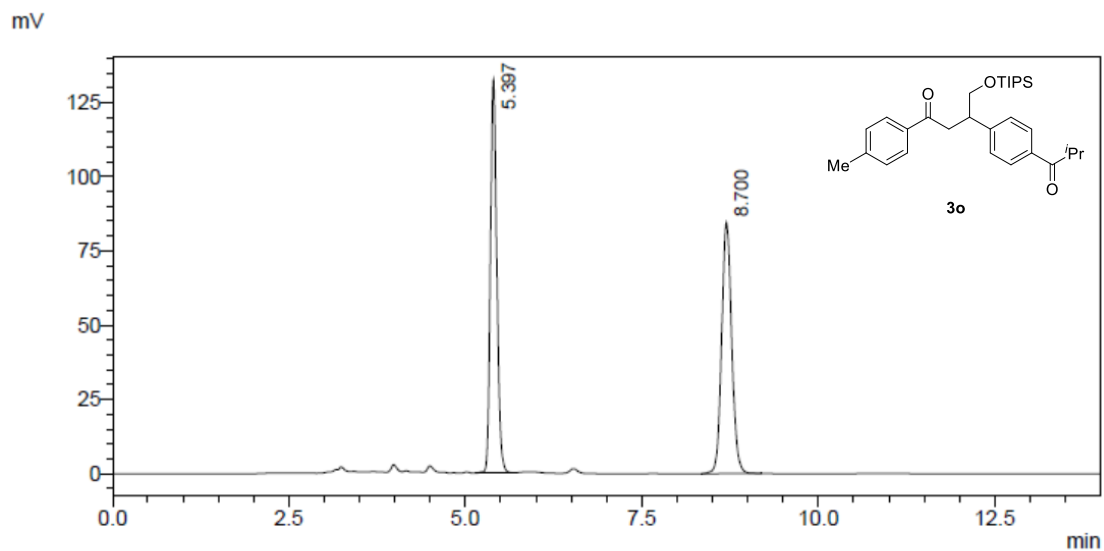

<Peak Table>

A 254nm

| Peak# | Ret. Time | Area    | Height | Area%   |
|-------|-----------|---------|--------|---------|
| 1     | 5.397     | 844944  | 132815 | 50.163  |
| 2     | 8.700     | 839453  | 84572  | 49.837  |
|       |           | 1684397 | 217387 | 100.000 |

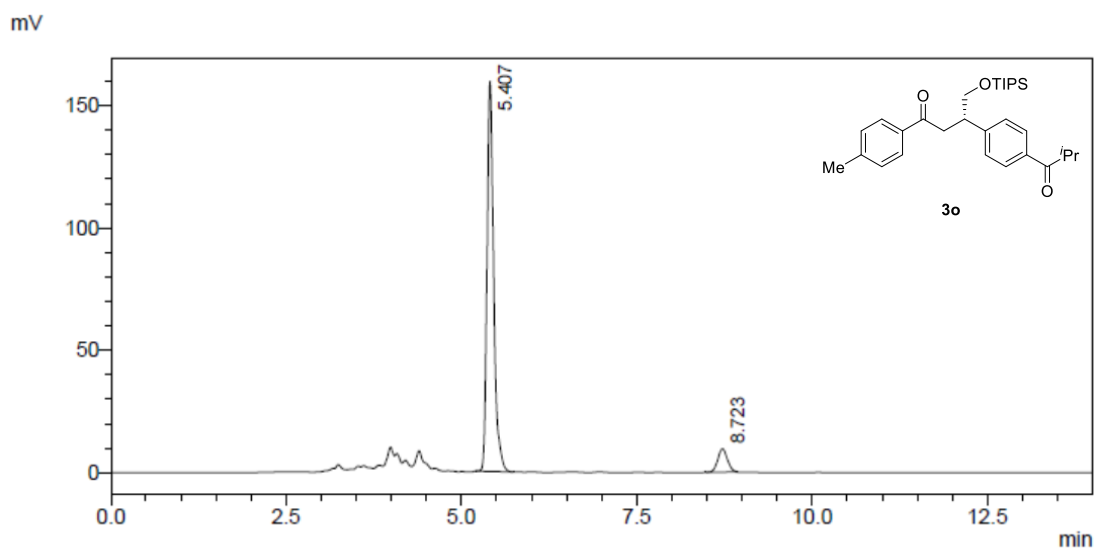

<Peak Table>

A 254nm

| Peak# | Ret. Time | Area    | Height | Area%   |
|-------|-----------|---------|--------|---------|
| 1     | 5.407     | 1051948 | 159896 | 92.075  |
| 2     | 8.723     | 90544   | 9461   | 7.925   |
|       |           | 1142491 | 169357 | 100.000 |

mV

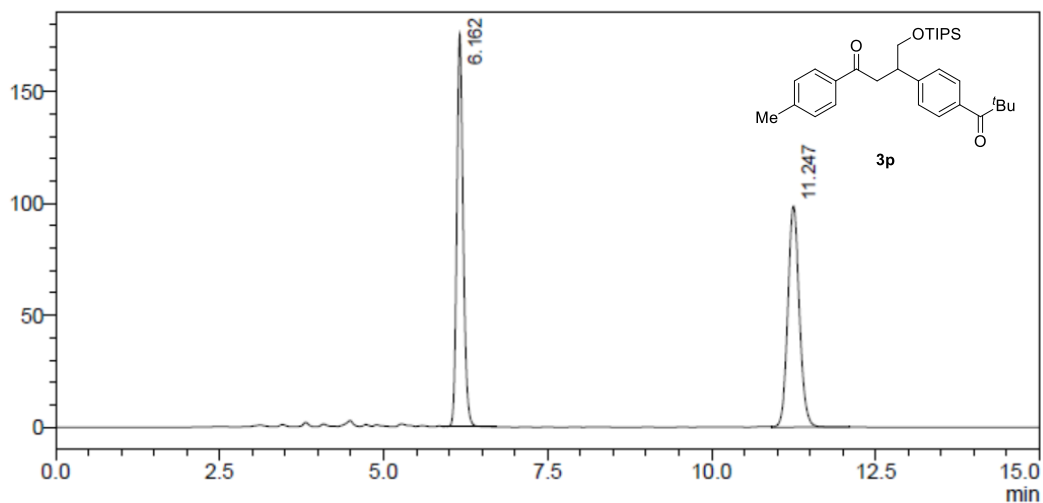

<Peak Table>

A 254nm

| Peak# | Ret. Time | Area    | Height | Area%   |
|-------|-----------|---------|--------|---------|
| 1     | 6.162     | 1210306 | 175627 | 50.074  |
| 2     | 11.247    | 1206753 | 98833  | 49.926  |
|       |           | 2417058 | 274460 | 100.000 |

mV

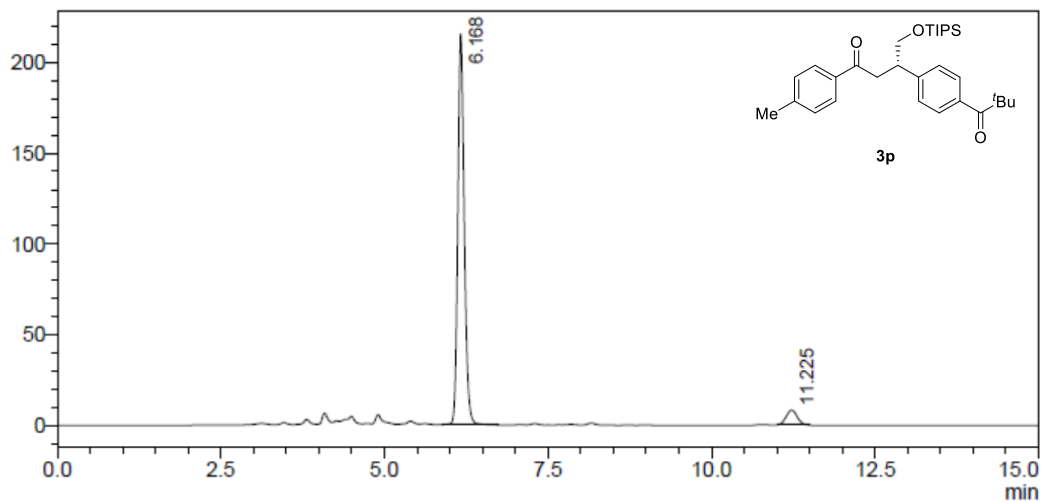

<Peak Table>

A 254nm

| Peak# | Ret. Time | Area    | Height | Area%   |
|-------|-----------|---------|--------|---------|
| 1     | 6.168     | 1505967 | 216075 | 94.009  |
| 2     | 11.225    | 95976   | 8191   | 5.991   |
|       |           | 1601943 | 224266 | 100.000 |

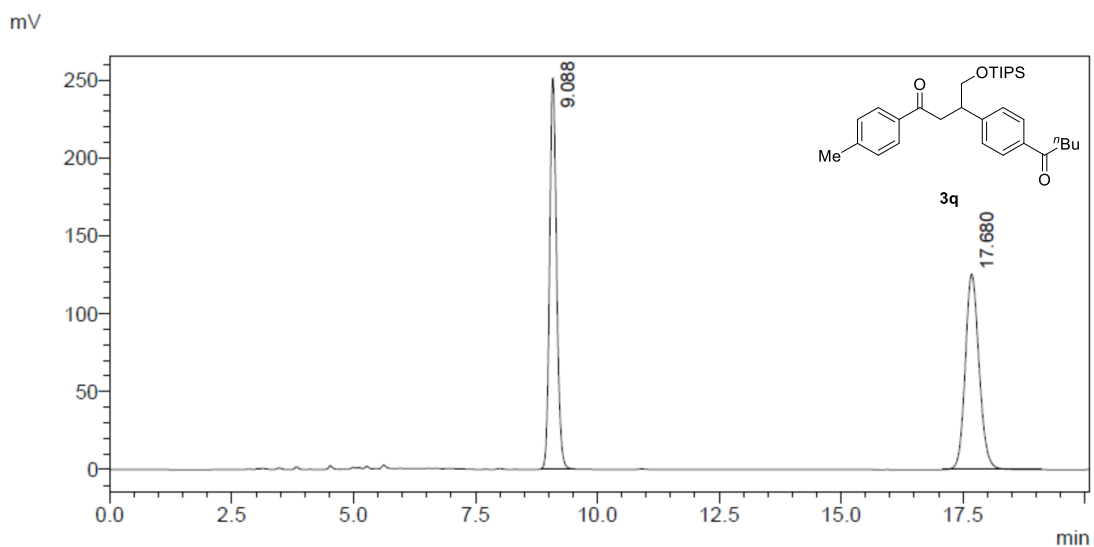

<Peak Table>

A 254nm

| Peak# | Ret. Time | Area    | Height | Area%   |
|-------|-----------|---------|--------|---------|
| 1     | 9.088     | 2484498 | 250590 | 50.032  |
| 2     | 17.680    | 2481329 | 125472 | 49.968  |
|       |           | 4965827 | 376062 | 100.000 |

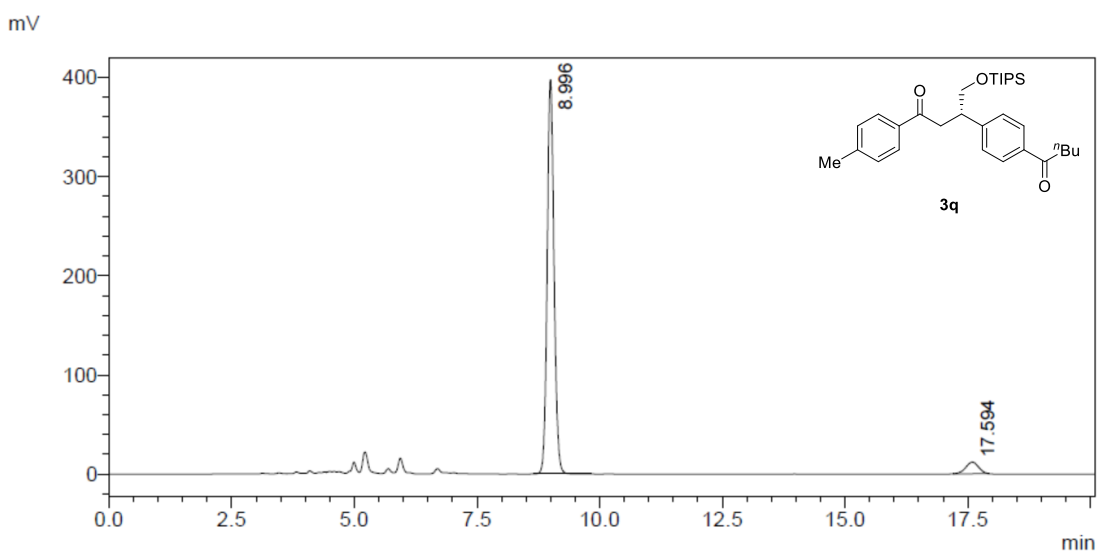

<Peak Table>

A 254nm

| Peak# | Ret. Time | Area    | Height | Area%   |
|-------|-----------|---------|--------|---------|
| 1     | 8.996     | 3857184 | 397172 | 94.763  |
| 2     | 17.594    | 213185  | 11654  | 5.237   |
|       |           | 4070369 | 408827 | 100.000 |



mV

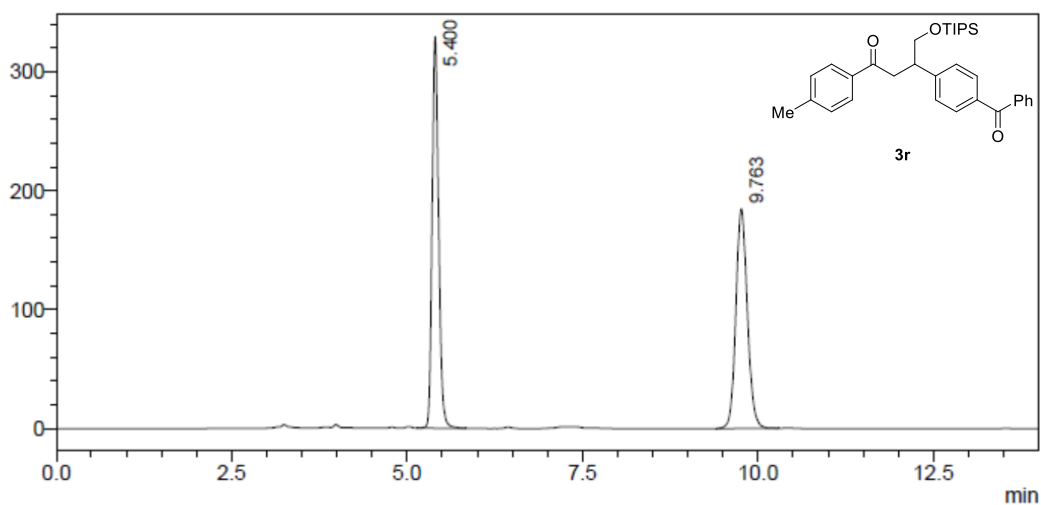

<Peak Table>

A 254nm

| Peak# | Ret. Time | Area    | Height | Area%   |
|-------|-----------|---------|--------|---------|
| 1     | 5.400     | 2121822 | 329634 | 50.092  |
| 2     | 9.763     | 2114028 | 184492 | 49.908  |
|       |           | 4235851 | 514126 | 100.000 |

mV

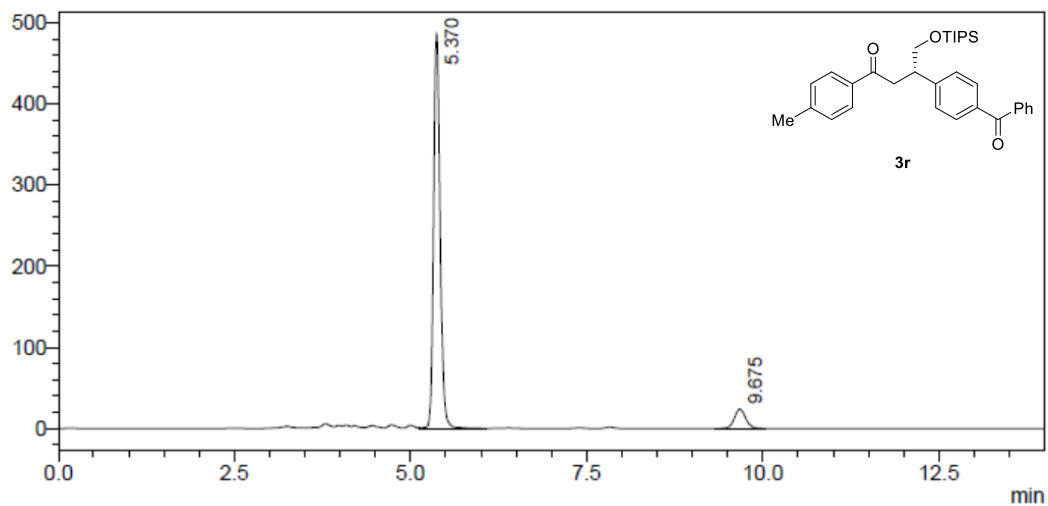

<Peak Table>

A 254nm

| Peak# | Ret. Time | Area    | Height | Area%   |
|-------|-----------|---------|--------|---------|
| 1     | 5.370     | 3139073 | 485835 | 92.152  |
| 2     | 9.675     | 267327  | 23848  | 7.848   |
|       |           | 3406400 | 509682 | 100.000 |

mV

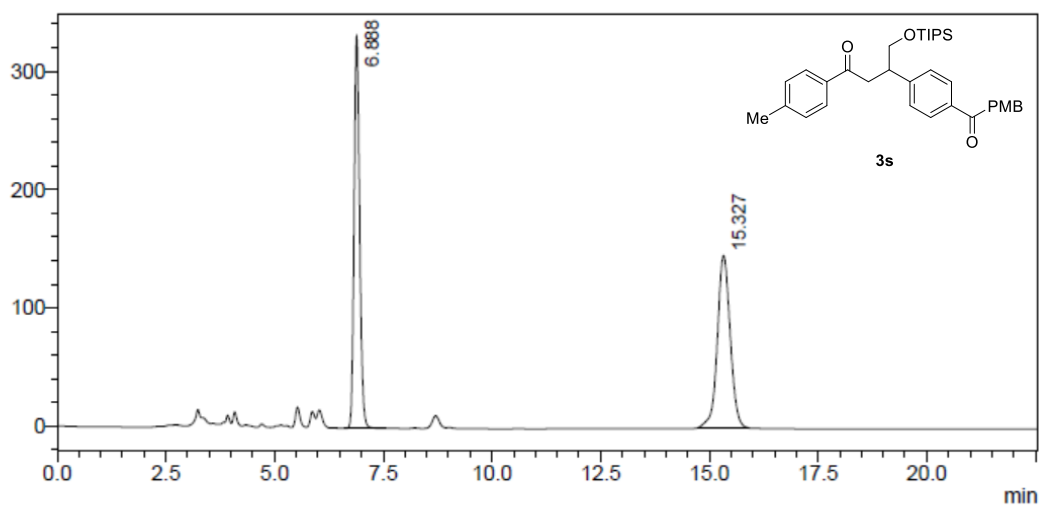

<Peak Table>

A 254nm

| Peak# | Ret. Time | Area    | Height | Area%   |
|-------|-----------|---------|--------|---------|
| 1     | 6.888     | 2958289 | 331661 | 49.742  |
| 2     | 15.327    | 2989015 | 145733 | 50.258  |
|       |           | 5947303 | 477393 | 100.000 |

mV

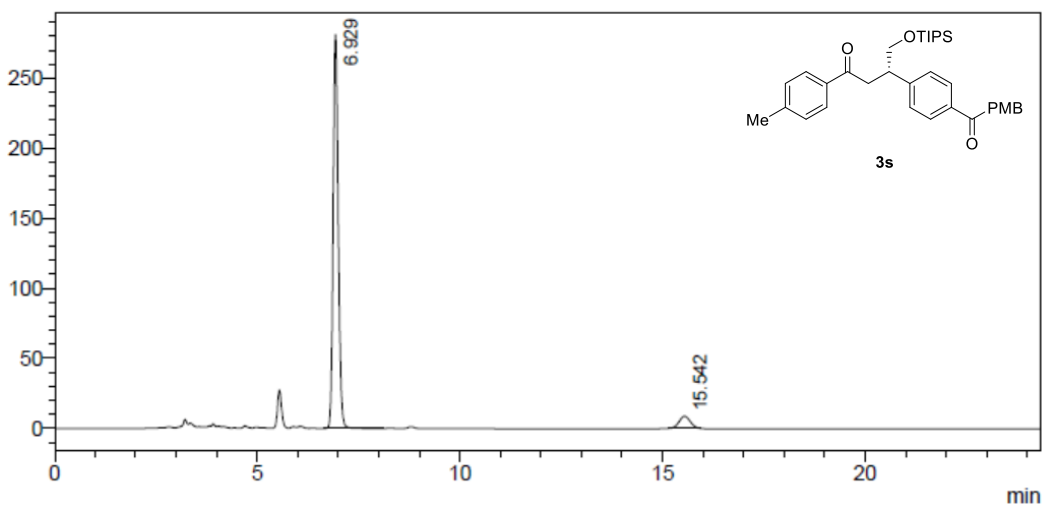

<Peak Table>

A 254nm

| Peak# | Ret. Time | Area    | Height | Area%   |
|-------|-----------|---------|--------|---------|
| 1     | 6.929     | 2465255 | 281127 | 93.774  |
| 2     | 15.542    | 163691  | 8593   | 6.226   |
|       |           | 2628946 | 289720 | 100.000 |

mV

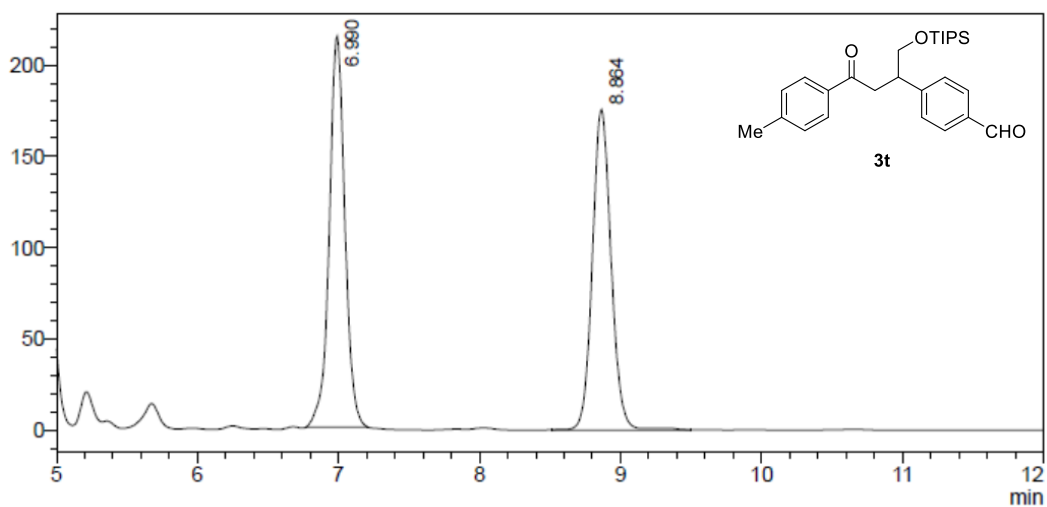

<Peak Table>

A 254nm

| Peak# | Ret. Time | Area    | Height | Area%   |
|-------|-----------|---------|--------|---------|
| 1     | 6.990     | 1647121 | 214024 | 50.187  |
| 2     | 8.864     | 1634824 | 175539 | 49.813  |
|       |           | 3281945 | 389563 | 100.000 |

mV

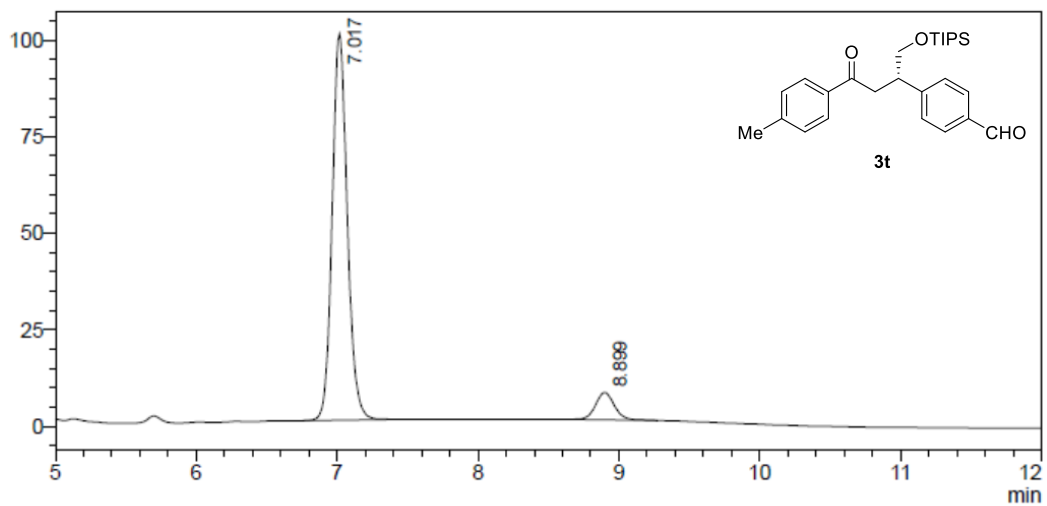

<Peak Table>

A 254nm

| Peak# | Ret. Time | Area   | Height | Area%   |
|-------|-----------|--------|--------|---------|
| 1     | 7.017     | 746828 | 100032 | 91.949  |
| 2     | 8.899     | 65389  | 7056   | 8.051   |
|       |           | 812217 | 107088 | 100.000 |

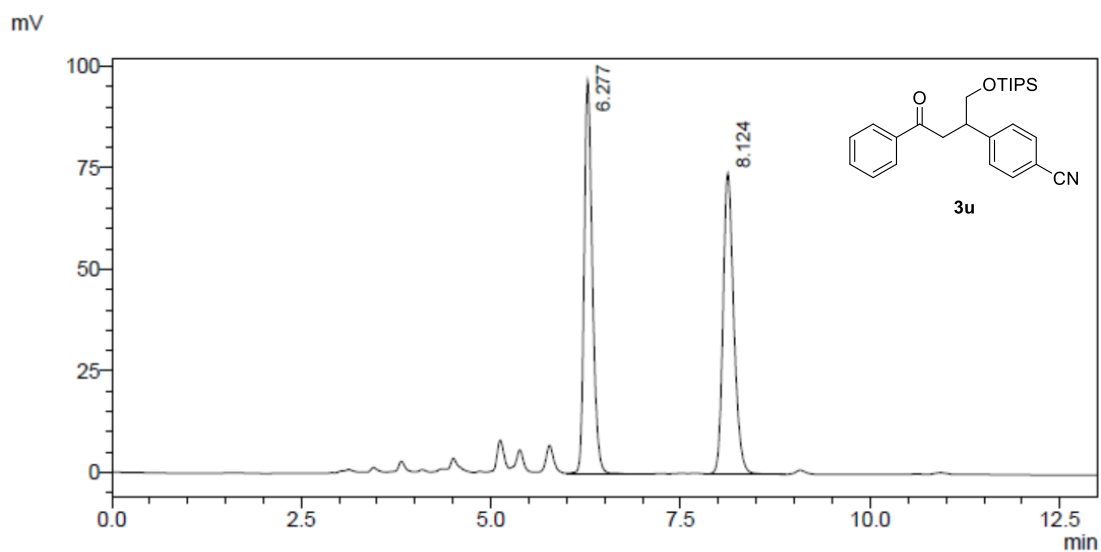

<Peak Table>

A 254nm

| Peak# | Ret. Time | Area    | Height | Area%   |
|-------|-----------|---------|--------|---------|
| 1     | 6.277     | 727504  | 96796  | 49.840  |
| 2     | 8.124     | 732186  | 74138  | 50.160  |
|       |           | 1459690 | 170934 | 100.000 |

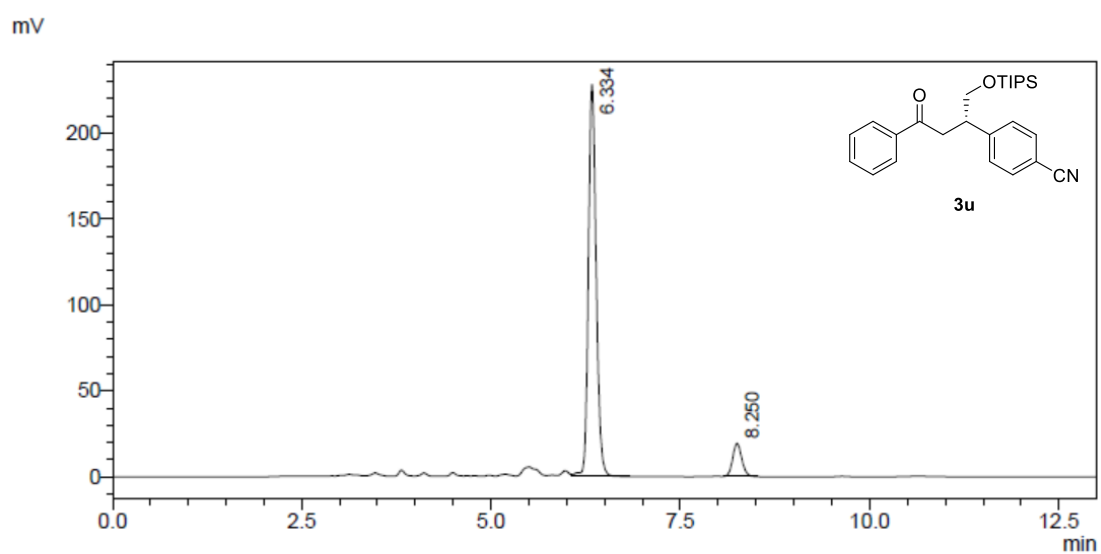

<Peak Table>

A 254nm

| Peak# | Ret. Time | Area    | Height | Area%   |
|-------|-----------|---------|--------|---------|
| 1     | 6.334     | 1633703 | 228505 | 91.012  |
| 2     | 8.250     | 161347  | 19295  | 8.988   |
|       |           | 1795050 | 247799 | 100.000 |

mV

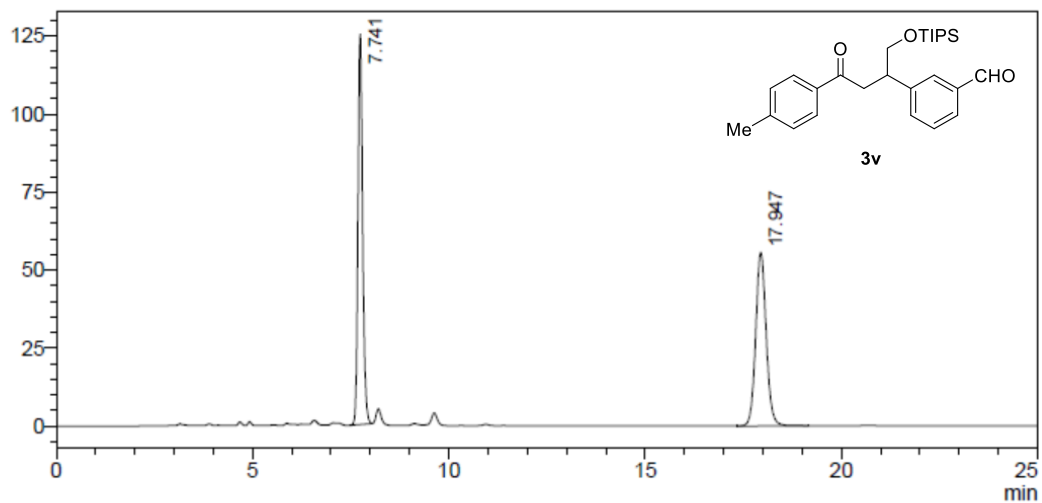

<Peak Table>

A 254nm

| Peak# | Ret. Time | Area    | Height | Area%   |
|-------|-----------|---------|--------|---------|
| 1     | 7.741     | 1034384 | 125279 | 50.009  |
| 2     | 17.947    | 1033994 | 55625  | 49.991  |
|       |           | 2068378 | 180905 | 100.000 |

mV

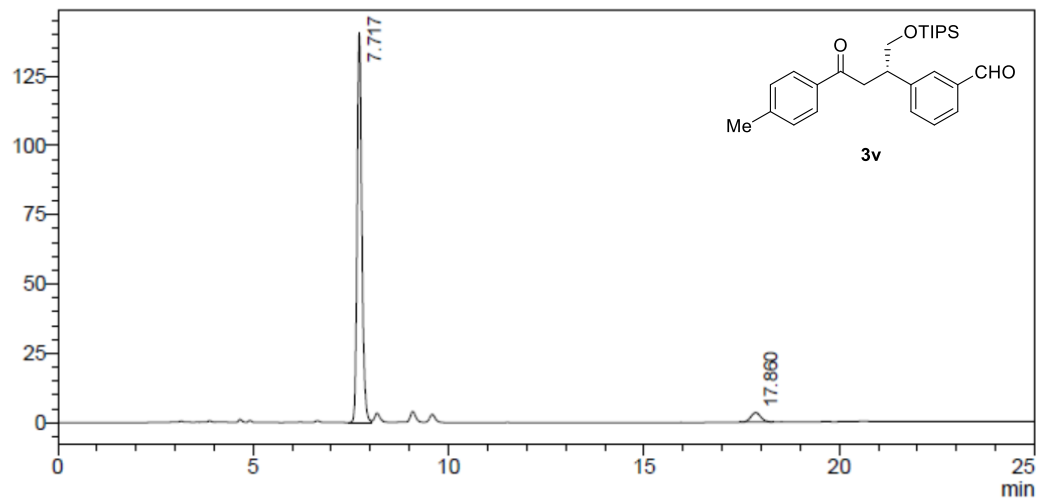

<Peak Table>

A 254nm

| Peak# | Ret. Time | Area    | Height | Area%   |
|-------|-----------|---------|--------|---------|
| 1     | 7.717     | 1178599 | 140759 | 95.193  |
| 2     | 17.860    | 59512   | 3371   | 4.807   |
|       |           | 1238111 | 144129 | 100.000 |

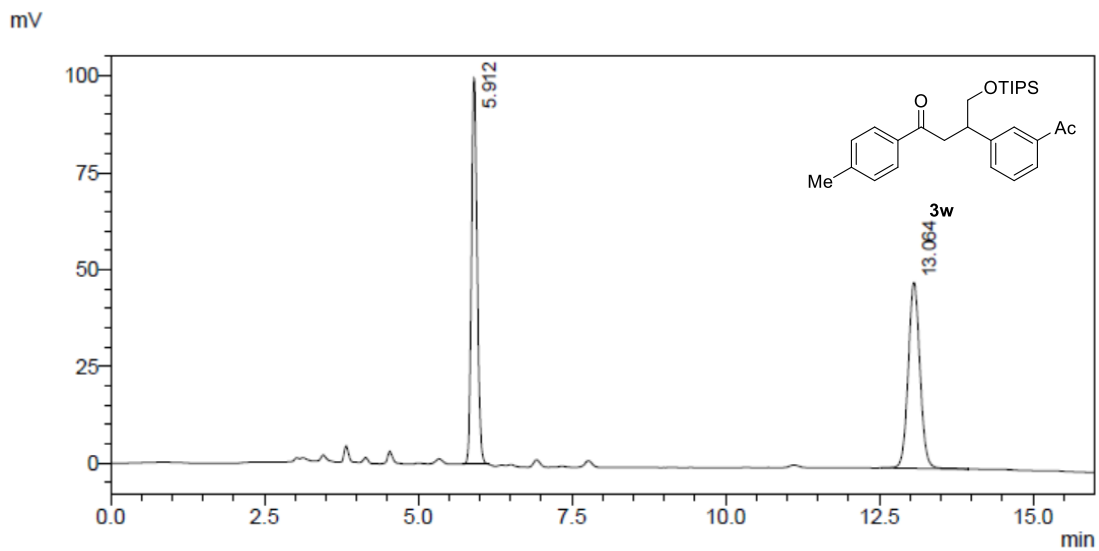

<Peak Table>

254nm

| Peak# | Ret. Time | Area    | Height | Area%   |
|-------|-----------|---------|--------|---------|
| 1     | 5.912     | 642152  | 99668  | 50.075  |
| 2     | 13.064    | 640215  | 48010  | 49.925  |
|       |           | 1282367 | 147679 | 100.000 |

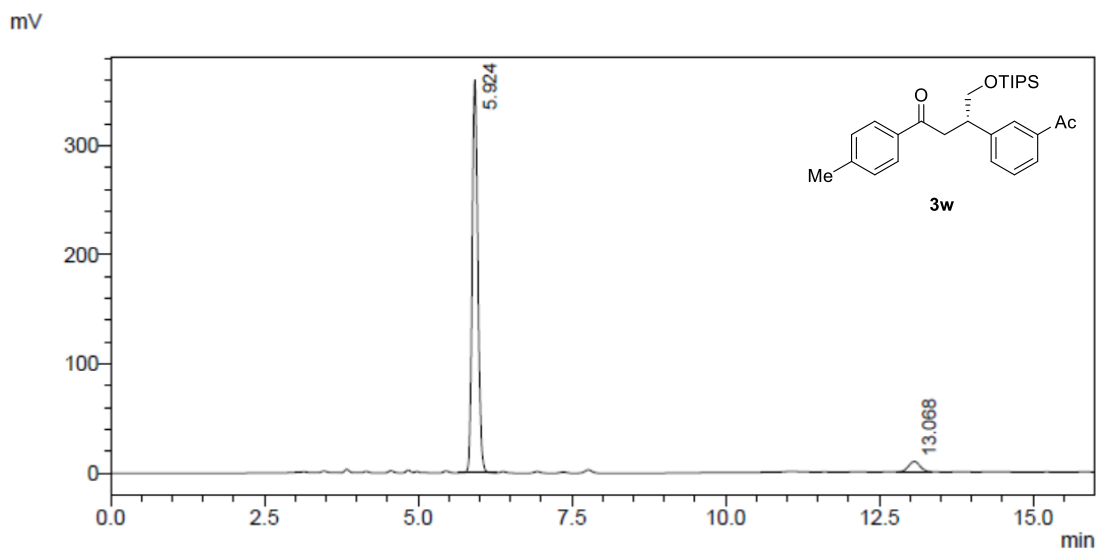

<Peak Table>

254nm

| Peak# | Ret. Time | Area    | Height | Area%   |
|-------|-----------|---------|--------|---------|
| 1     | 5.924     | 2326493 | 360300 | 95.021  |
| 2     | 13.068    | 121907  | 9502   | 4.979   |
|       |           | 2448399 | 369802 | 100.000 |

mV

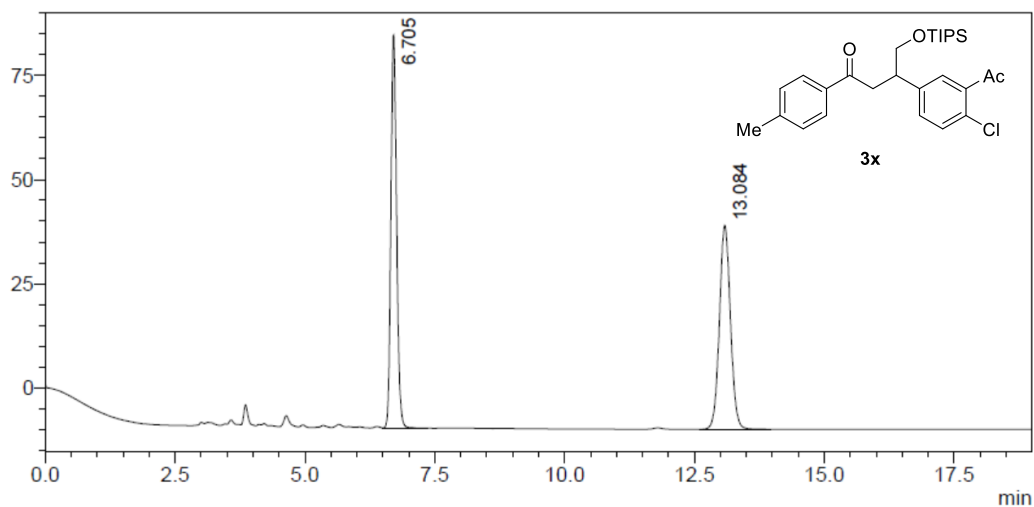

<Peak Table>

A 254nm

| Peak# | Ret. Time | Area    | Height | Area%   |
|-------|-----------|---------|--------|---------|
| 1     | 6.705     | 722540  | 94422  | 49.941  |
| 2     | 13.084    | 724241  | 48937  | 50.059  |
|       |           | 1446781 | 143359 | 100.000 |

mV

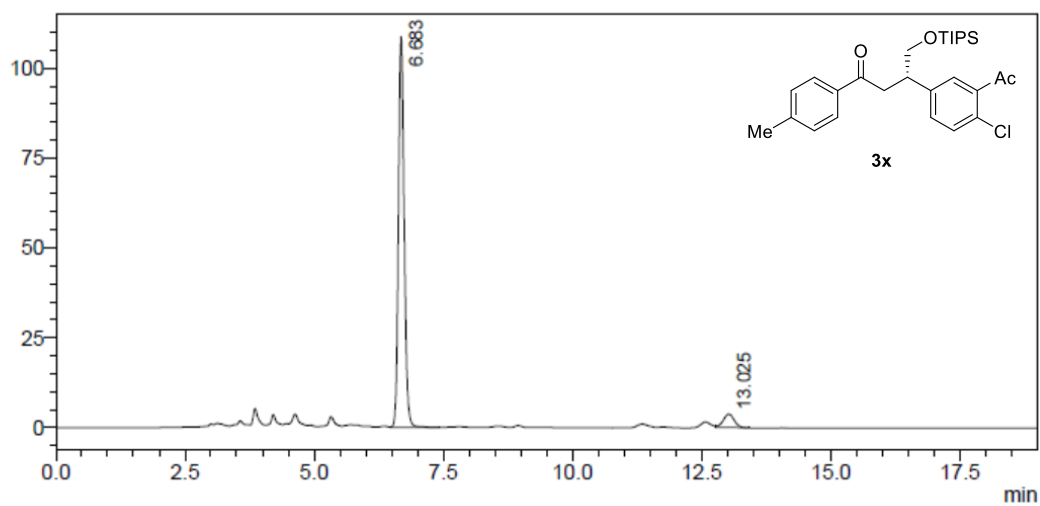

<Peak Table>

A 254nm

| Peak# | Ret. Time | Area   | Height | Area%   |
|-------|-----------|--------|--------|---------|
| 1     | 6.683     | 837399 | 108817 | 93.941  |
| 2     | 13.025    | 54009  | 3700   | 6.059   |
|       |           | 891408 | 112516 | 100.000 |

mV

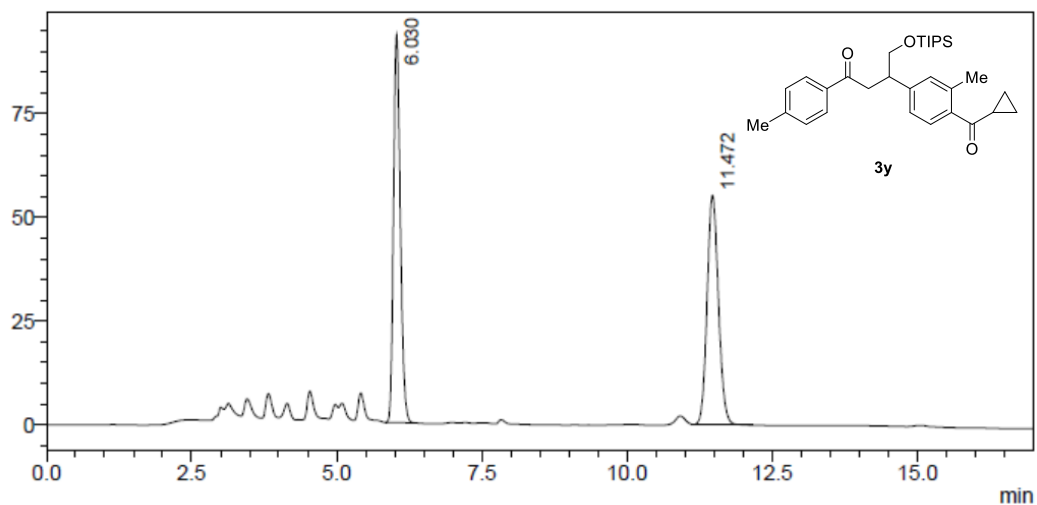

<Peak Table>

A 254nm

| Peak# | Ret. Time | Area    | Height | Area%   |
|-------|-----------|---------|--------|---------|
| 1     | 6.030     | 761710  | 93598  | 50.216  |
| 2     | 11.472    | 755144  | 55379  | 49.784  |
|       |           | 1516854 | 148977 | 100.000 |

mV

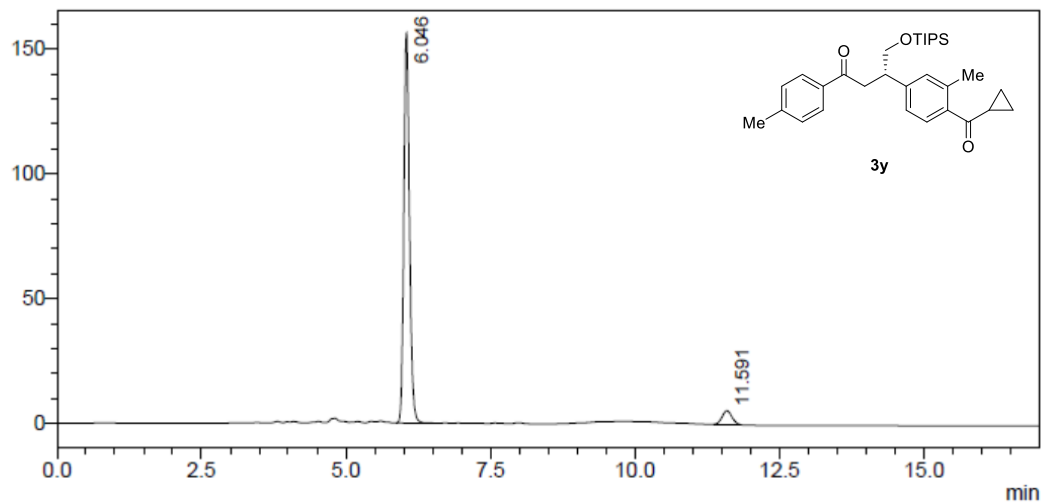

<Peak Table>

A 254nm

| Peak# | Ret. Time | Area    | Height | Area%   |
|-------|-----------|---------|--------|---------|
| 1     | 6.046     | 1063854 | 156434 | 94.369  |
| 2     | 11.591    | 63485   | 5455   | 5.631   |
|       |           | 1127339 | 161889 | 100.000 |



mV

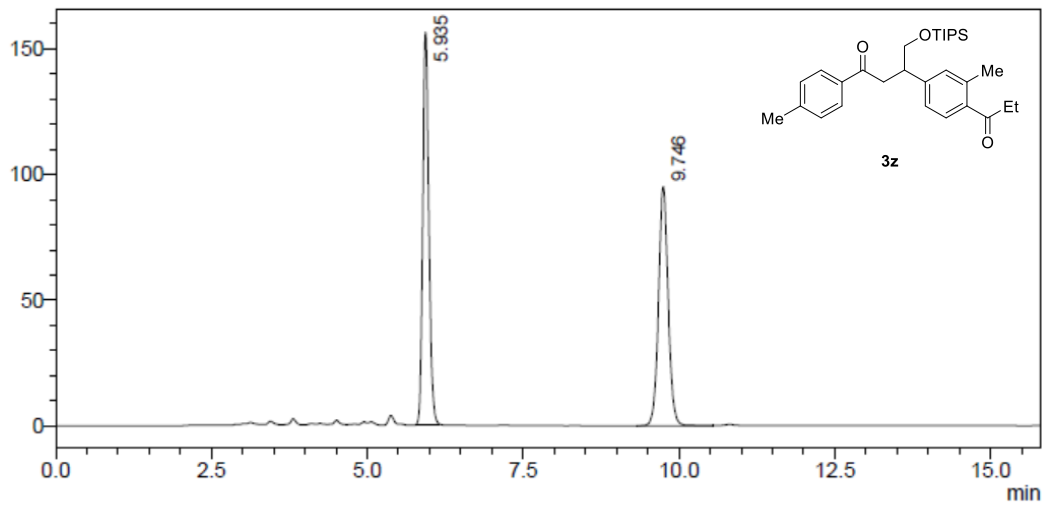

<Peak Table>

A 254nm

| Peak# | Ret. Time | Area    | Height | Area%   |
|-------|-----------|---------|--------|---------|
| 1     | 5.935     | 1054828 | 156230 | 50.544  |
| 2     | 9.746     | 1032103 | 95080  | 49.456  |
|       |           | 2086932 | 251310 | 100.000 |

mV

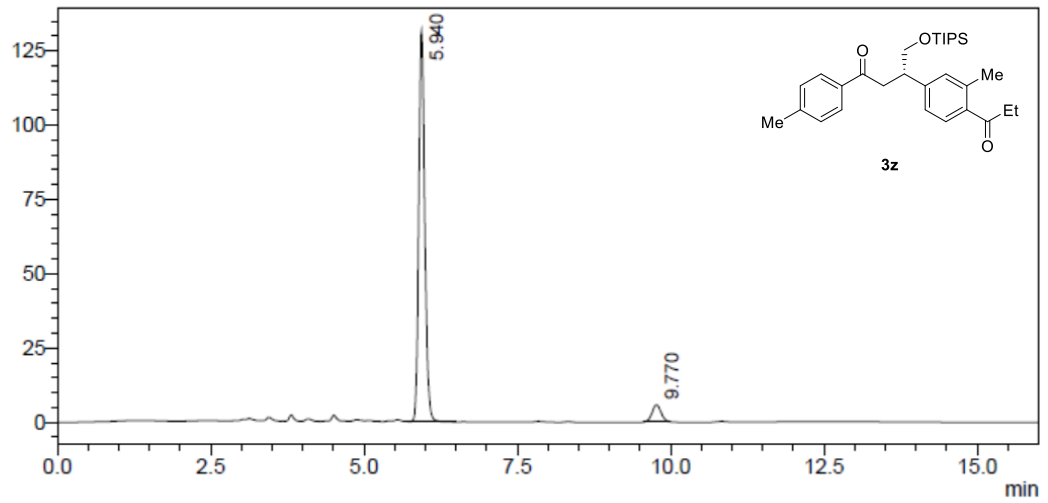

<Peak Table>

A 254nm

| Peak# | Ret. Time | Area   | Height | Area%   |
|-------|-----------|--------|--------|---------|
| 1     | 5.940     | 902636 | 131874 | 93.935  |
| 2     | 9.770     | 58284  | 5730   | 6.065   |
|       |           | 960921 | 137604 | 100.000 |

mV

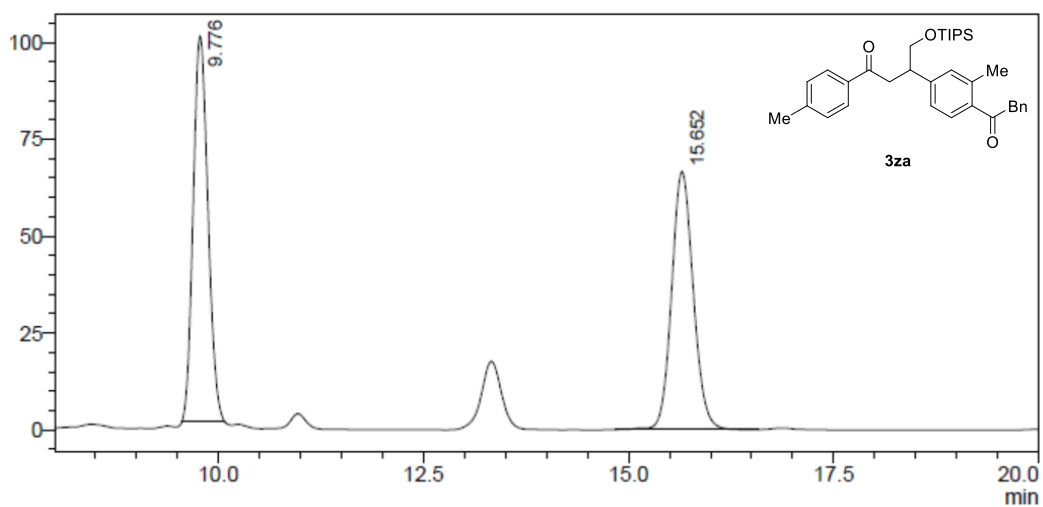

<Peak Table>

A 254nm

| Peak# | Ret. Time | Area    | Height | Area%   |
|-------|-----------|---------|--------|---------|
| 1     | 9.776     | 1238735 | 99238  | 50.295  |
| 2     | 15.652    | 1224187 | 66627  | 49.705  |
|       |           | 2462922 | 165865 | 100.000 |

mV

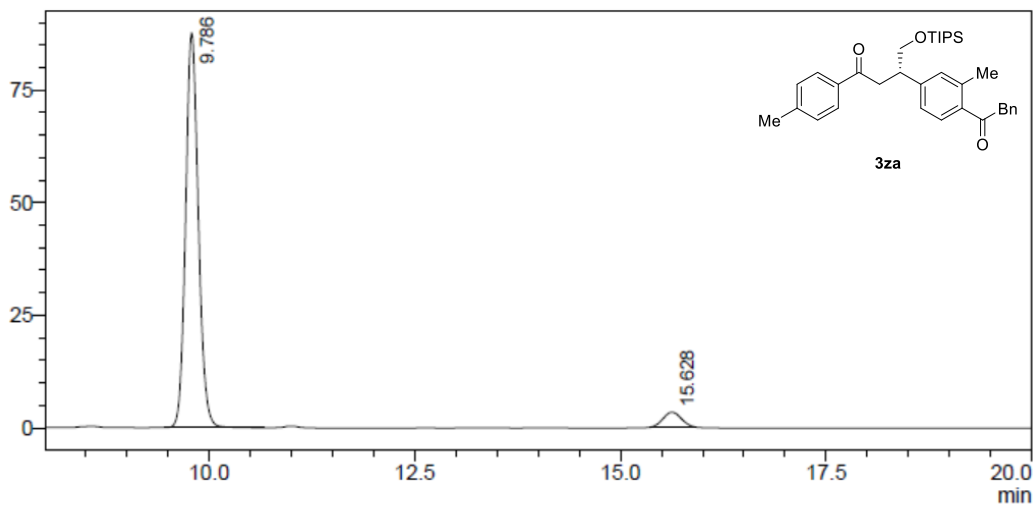

<Peak Table>

A 254nm

| Peak# | Ret. Time | Area    | Height | Area%   |
|-------|-----------|---------|--------|---------|
| 1     | 9.786     | 948917  | 87599  | 94.824  |
| 2     | 15.628    | 51799   | 3339   | 5.176   |
|       |           | 1000717 | 90937  | 100.000 |

mV

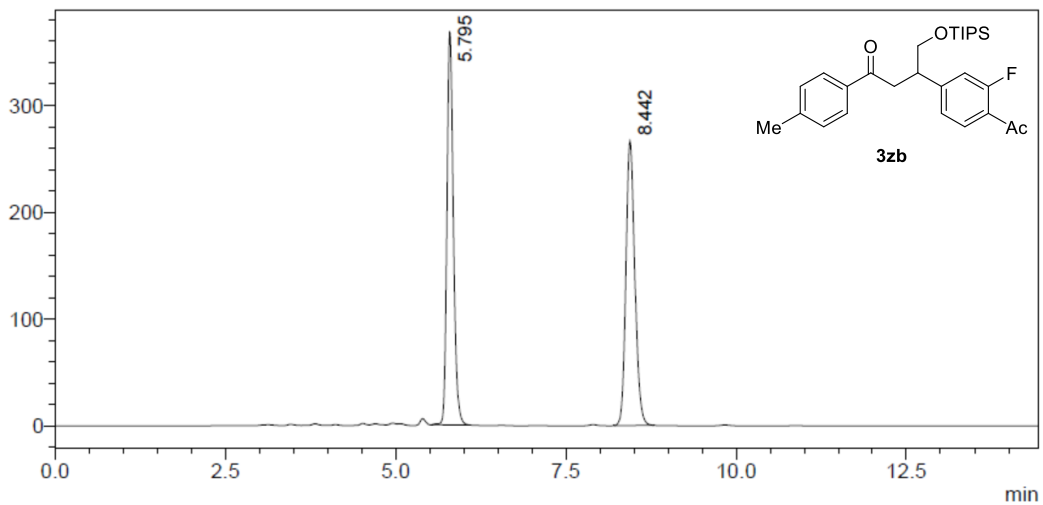

<Peak Table>

A 254nm

| Peak# | Ret. Time | Area    | Height | Area%   |
|-------|-----------|---------|--------|---------|
| 1     | 5.795     | 2450768 | 367658 | 50.107  |
| 2     | 8.442     | 2440327 | 266317 | 49.893  |
|       |           | 4891095 | 633975 | 100.000 |

mV

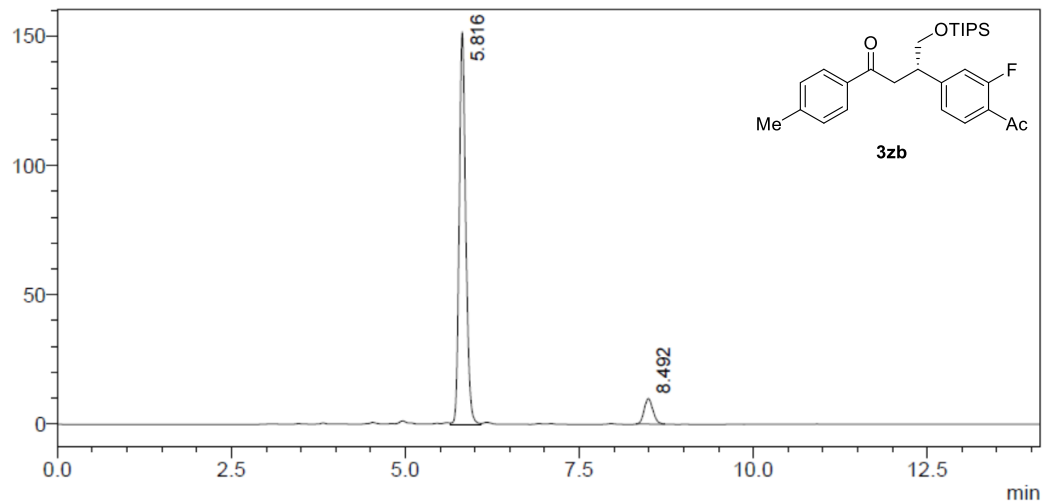

<Peak Table>

A 254nm

| Peak# | Ret. Time | Area    | Height | Area%   |
|-------|-----------|---------|--------|---------|
| 1     | 5.816     | 998192  | 151975 | 92.029  |
| 2     | 8.492     | 86460   | 9894   | 7.971   |
|       |           | 1084652 | 161869 | 100.000 |

mV

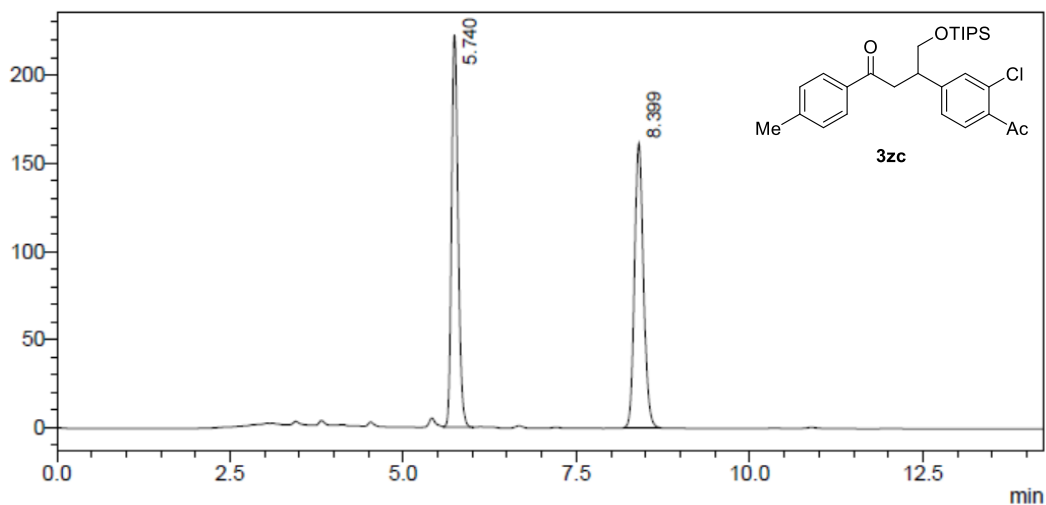

<Peak Table>

A 254nm

| Peak# | Ret. Time | Area    | Height | Area%   |
|-------|-----------|---------|--------|---------|
| 1     | 5.740     | 1443763 | 222541 | 49.840  |
| 2     | 8.399     | 1453062 | 161307 | 50.160  |
|       |           | 2896825 | 383848 | 100.000 |

mV

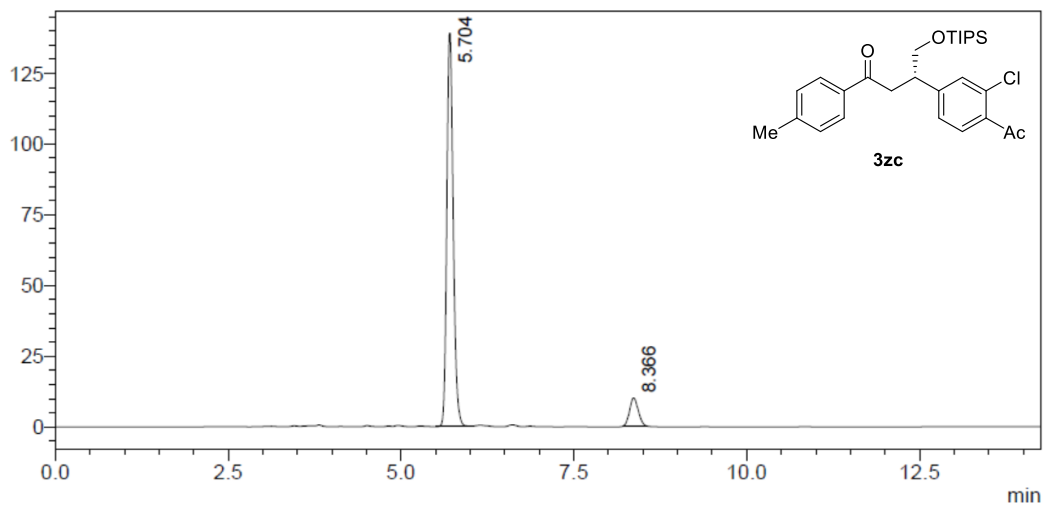

<Peak Table>

A 254nm

| Peak# | Ret. Time | Area   | Height | Area%   |
|-------|-----------|--------|--------|---------|
| 1     | 5.704     | 891059 | 139032 | 91.206  |
| 2     | 8.366     | 85919  | 9981   | 8.794   |
|       |           | 976978 | 149013 | 100.000 |

mV

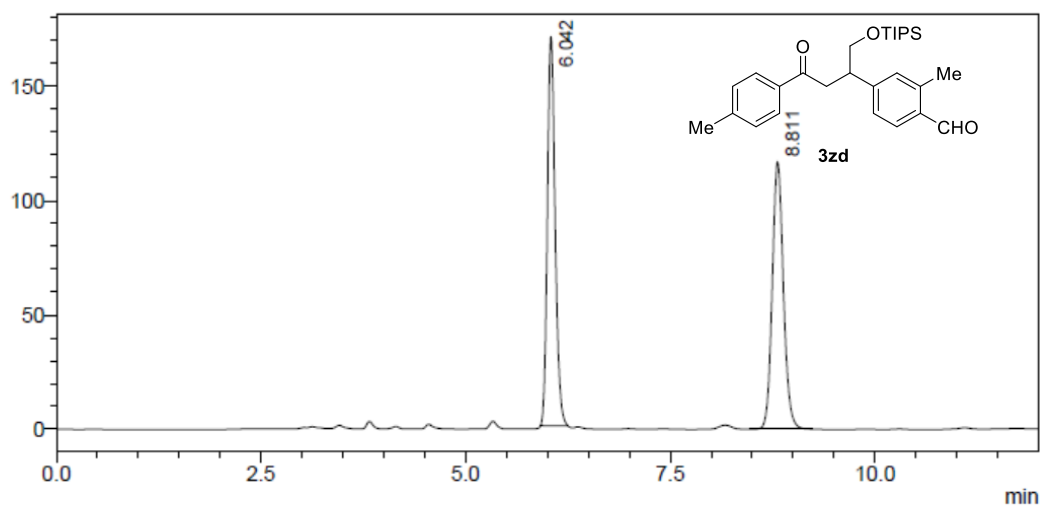

<Peak Table>

254nm

| Peak# | Ret. Time | Area    | Height | Area%   |
|-------|-----------|---------|--------|---------|
| 1     | 6.042     | 1122266 | 170345 | 50.256  |
| 2     | 8.811     | 1110855 | 116878 | 49.744  |
|       |           | 2233121 | 287224 | 100.000 |

mV

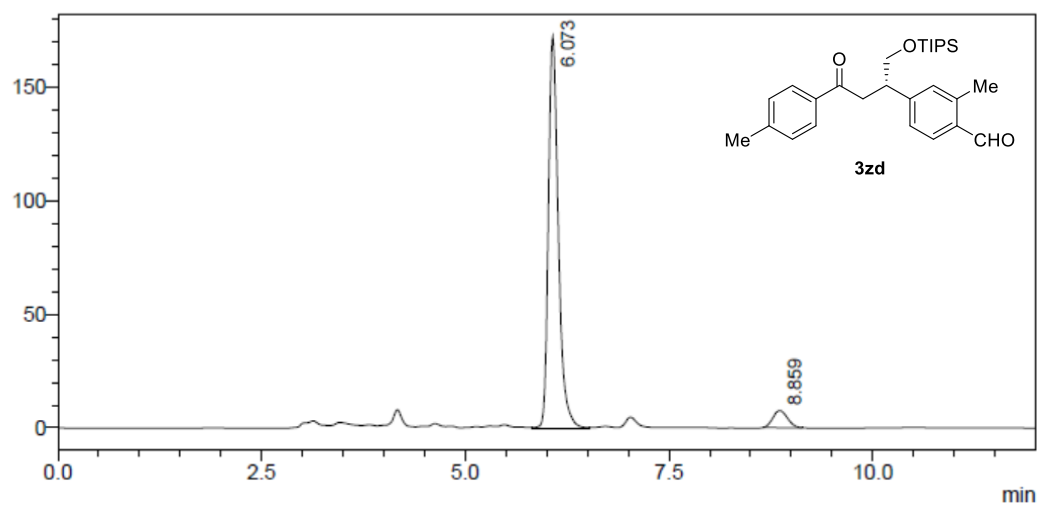

<Peak Table>

254nm

| Peak# | Ret. Time | Area    | Height | Area%   |
|-------|-----------|---------|--------|---------|
| 1     | 6.073     | 1471330 | 172398 | 94.001  |
| 2     | 8.859     | 93900   | 7538   | 5.999   |
|       |           | 1565231 | 179936 | 100.000 |

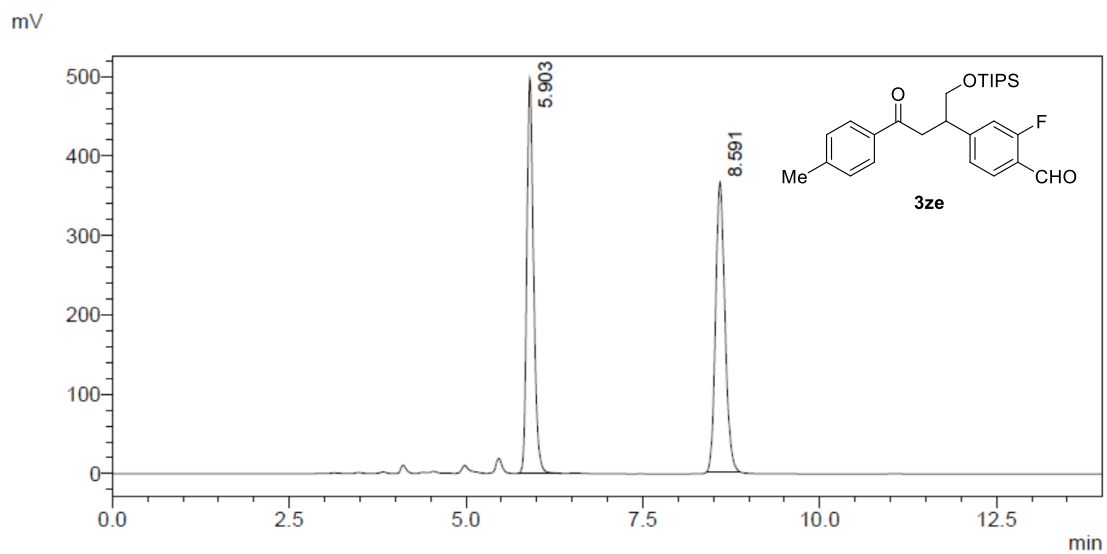

<Peak Table>

A 254nm

| Peak# | Ret. Time | Area    | Height | Area%   |
|-------|-----------|---------|--------|---------|
| 1     | 5.903     | 3309070 | 497572 | 49.701  |
| 2     | 8.591     | 3348858 | 364082 | 50.299  |
|       |           | 6657928 | 861654 | 100.000 |

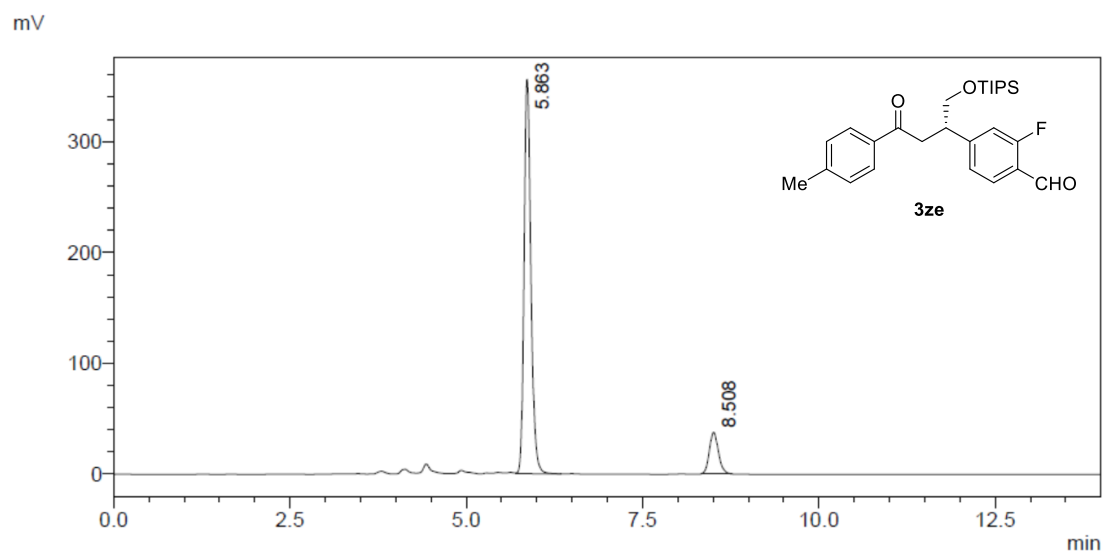

<Peak Table>

A 254nm

| Peak# | Ret. Time | Area    | Height | Area%   |
|-------|-----------|---------|--------|---------|
| 1     | 5.863     | 2398501 | 354989 | 87.695  |
| 2     | 8.508     | 336554  | 37521  | 12.305  |
|       |           | 2735055 | 392511 | 100.000 |

mV

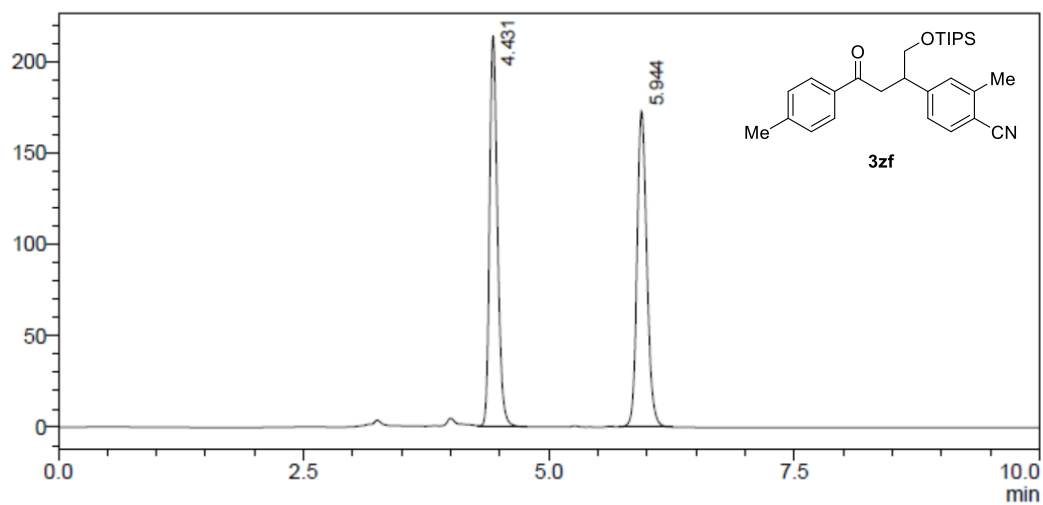

<Peak Table>

A 254nm

| Peak# | Ret. Time | Area    | Height | Area%   |
|-------|-----------|---------|--------|---------|
| 1     | 4.431     | 1197296 | 214245 | 49.908  |
| 2     | 5.944     | 1201711 | 173024 | 50.092  |
|       |           | 2399007 | 387269 | 100.000 |

mV

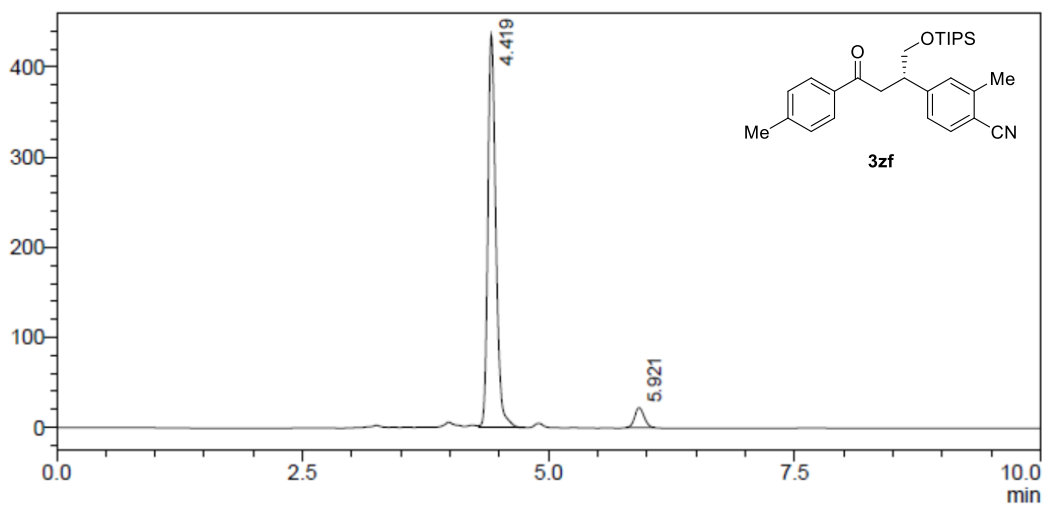

<Peak Table>

A 254nm

| Peak# | Ret. Time | Area    | Height | Area%   |
|-------|-----------|---------|--------|---------|
| 1     | 4.419     | 2471559 | 435671 | 94.463  |
| 2     | 5.921     | 144873  | 22008  | 5.537   |
|       |           | 2616432 | 457679 | 100.000 |

mV

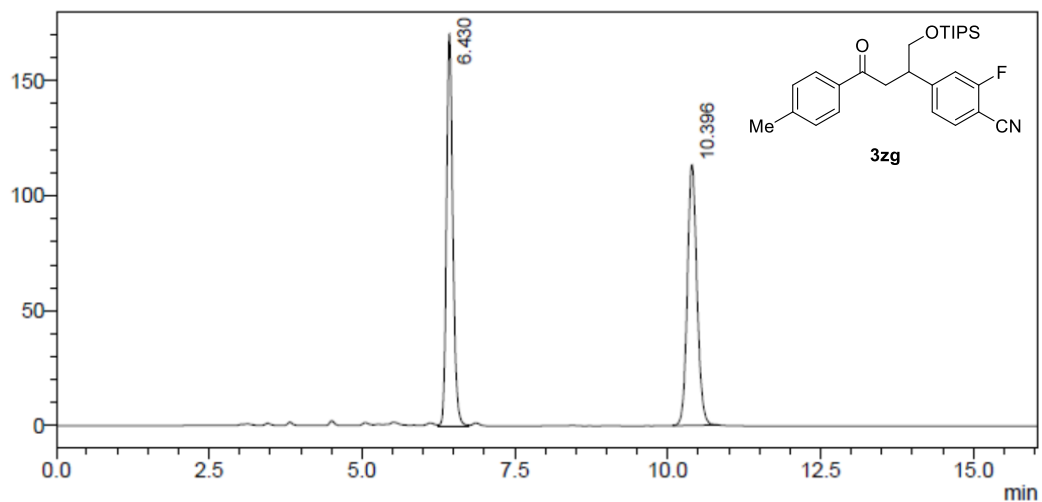

<Peak Table>

A 254nm

| Peak# | Ret. Time | Area    | Height | Area%   |
|-------|-----------|---------|--------|---------|
| 1     | 6.430     | 1229862 | 170409 | 49.811  |
| 2     | 10.396    | 1239176 | 113145 | 50.189  |
|       |           | 2469037 | 283554 | 100.000 |

mV

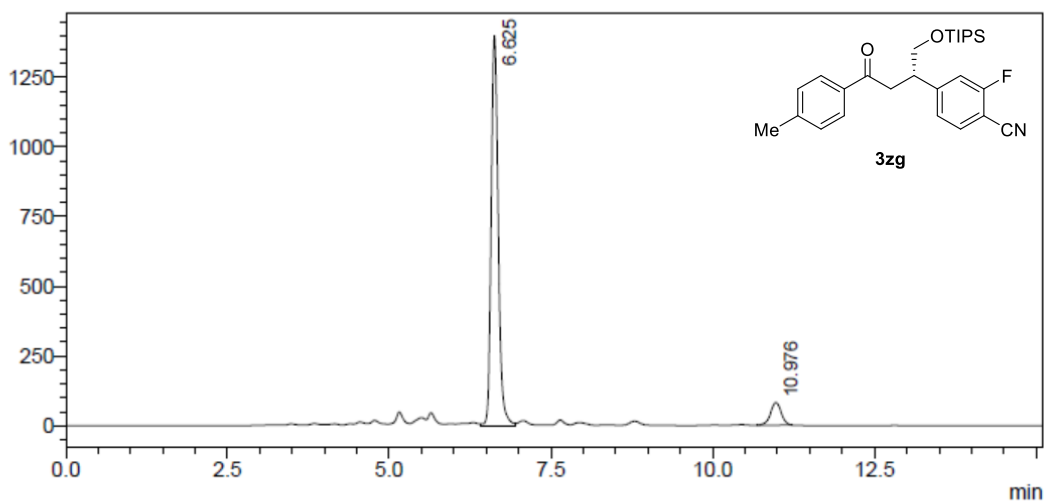

<Peak Table>

A 254nm

| Peak# | Ret. Time | Area     | Height  | Area%   |
|-------|-----------|----------|---------|---------|
| 1     | 6.625     | 10538265 | 1401655 | 91.814  |
| 2     | 10.976    | 939556   | 81312   | 8.186   |
|       |           | 11477821 | 1482966 | 100.000 |



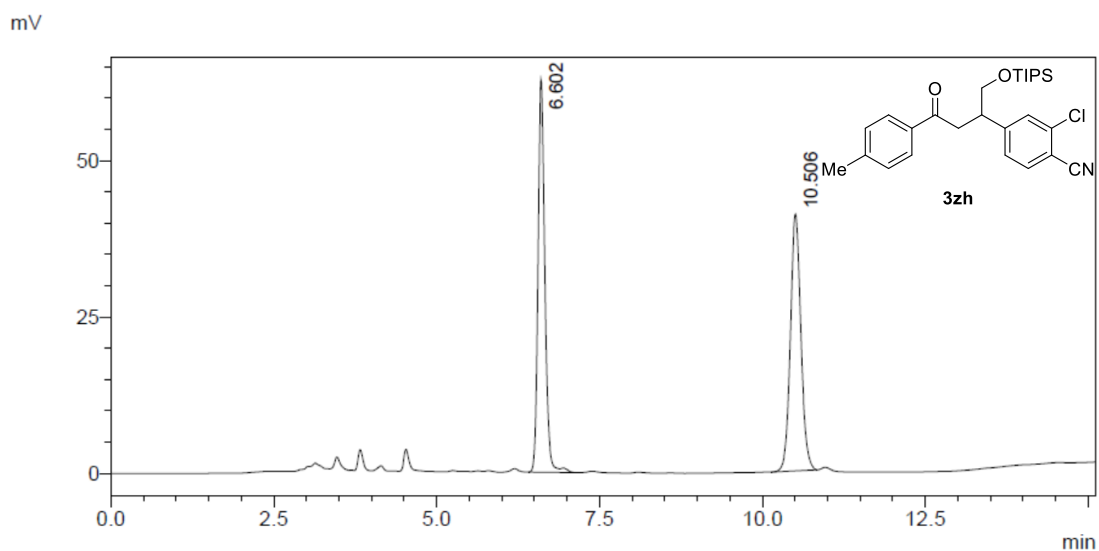

<Peak Table>

A 254nm

| Peak# | Ret. Time | Area   | Height | Area%   |
|-------|-----------|--------|--------|---------|
| 1     | 6.602     | 459670 | 62764  | 50.039  |
| 2     | 10.506    | 458955 | 41021  | 49.961  |
|       |           | 918625 | 103785 | 100.000 |

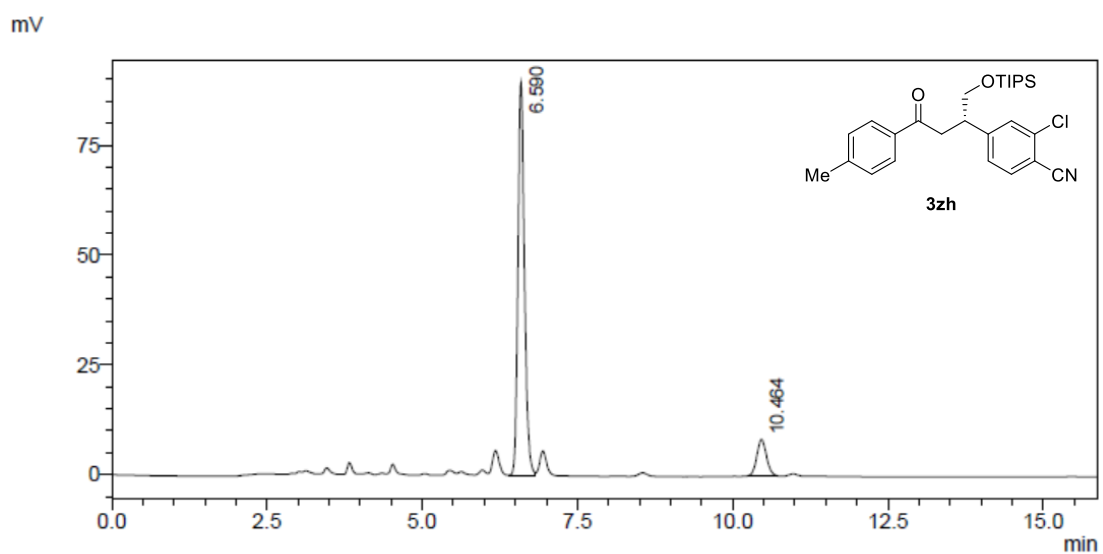

<Peak Table>

A 254nm

| Peak# | Ret. Time | Area   | Height | Area%   |
|-------|-----------|--------|--------|---------|
| 1     | 6.590     | 656441 | 89618  | 88.170  |
| 2     | 10.464    | 88073  | 8220   | 11.830  |
|       |           | 744514 | 97838  | 100.000 |

mV

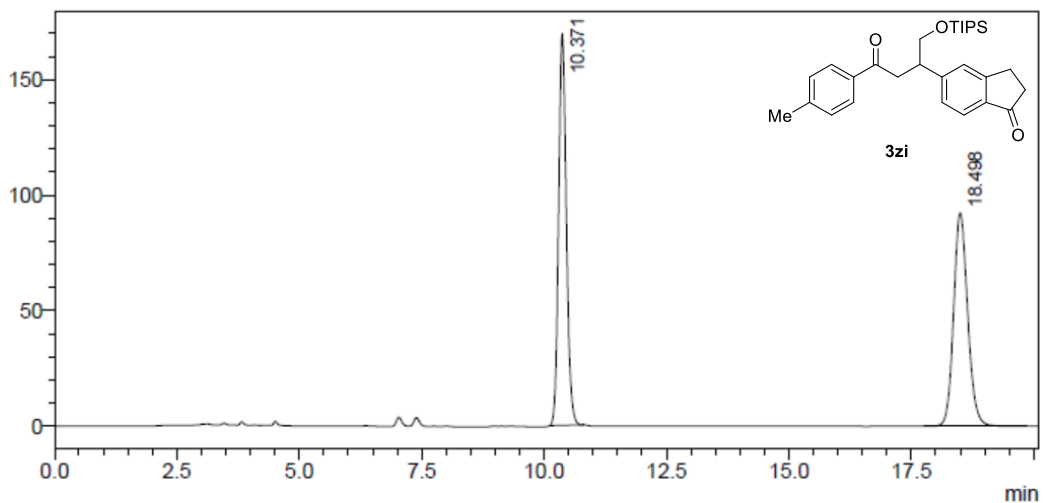

<Peak Table>

A 254nm

| Peak# | Ret. Time | Area    | Height | Area%   |
|-------|-----------|---------|--------|---------|
| 1     | 10.371    | 1866595 | 169634 | 50.244  |
| 2     | 18.498    | 1848477 | 92339  | 49.756  |
|       |           | 3715072 | 261974 | 100.000 |

mV

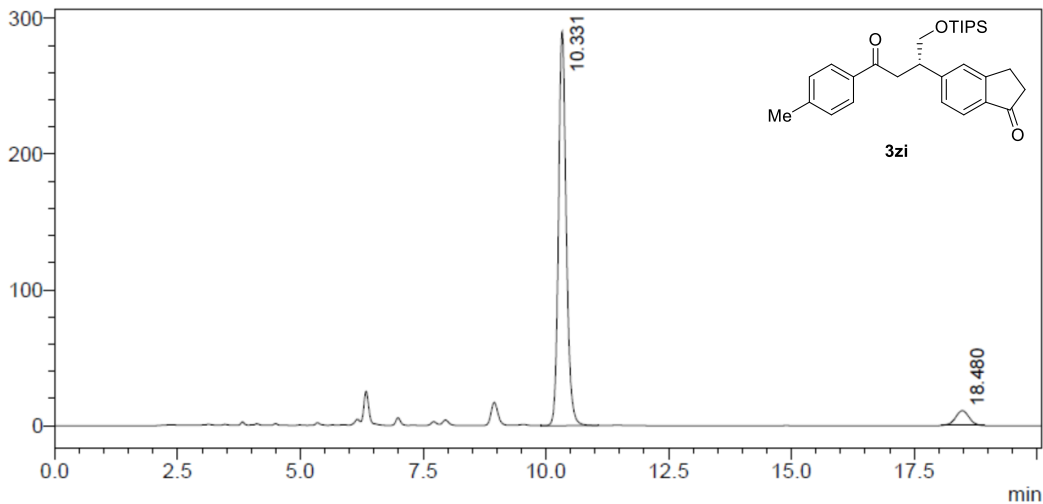

<Peak Table>

A 254nm

| Peak# | Ret. Time | Area    | Height | Area%   |
|-------|-----------|---------|--------|---------|
| 1     | 10.331    | 3201568 | 290245 | 93.827  |
| 2     | 18.480    | 210628  | 10921  | 6.173   |
|       |           | 3412196 | 301166 | 100.000 |

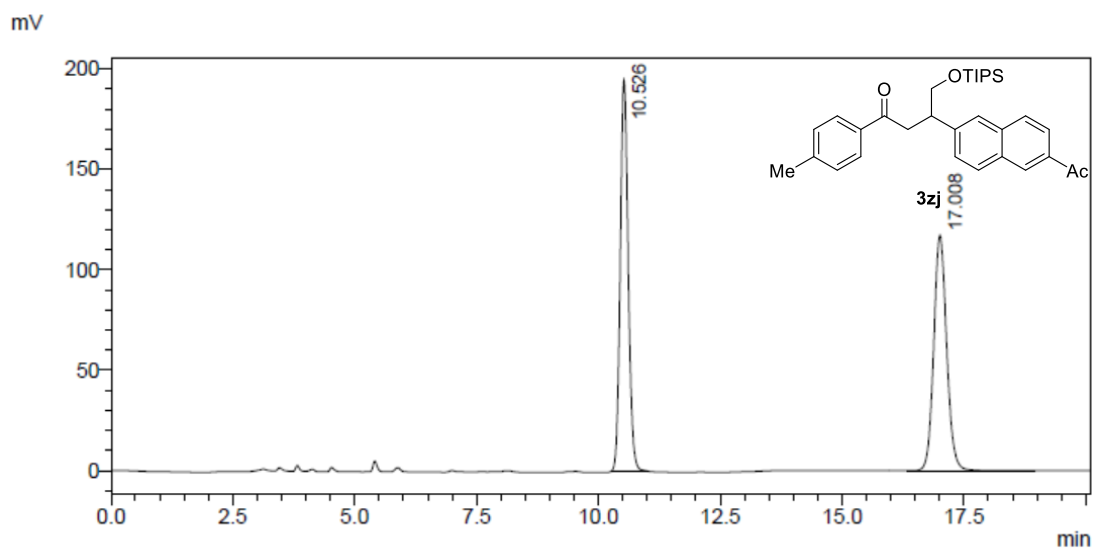

<Peak Table>

A 254nm

| Peak# | Ret. Time | Area    | Height | Area%   |
|-------|-----------|---------|--------|---------|
| 1     | 10.526    | 2203631 | 194613 | 50.501  |
| 2     | 17.008    | 2159901 | 117146 | 49.499  |
|       |           | 4363533 | 311759 | 100.000 |

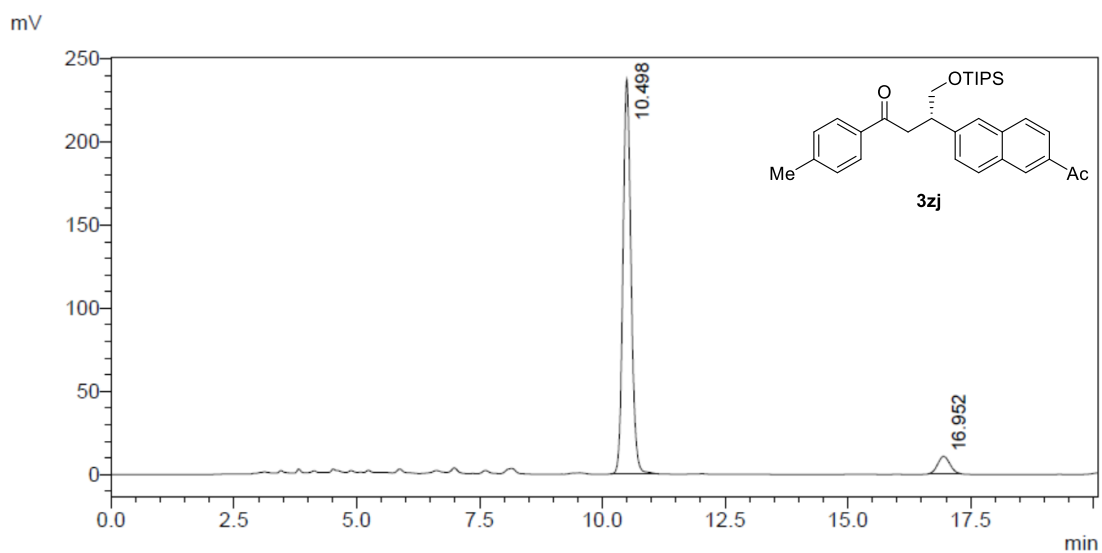

<Peak Table>

A 254nm

| Peak# | Ret. Time | Area    | Height | Area%   |
|-------|-----------|---------|--------|---------|
| 1     | 10.498    | 2712054 | 237065 | 93.801  |
| 2     | 16.952    | 179222  | 10456  | 6.199   |
|       |           | 2891276 | 247521 | 100.000 |

mV

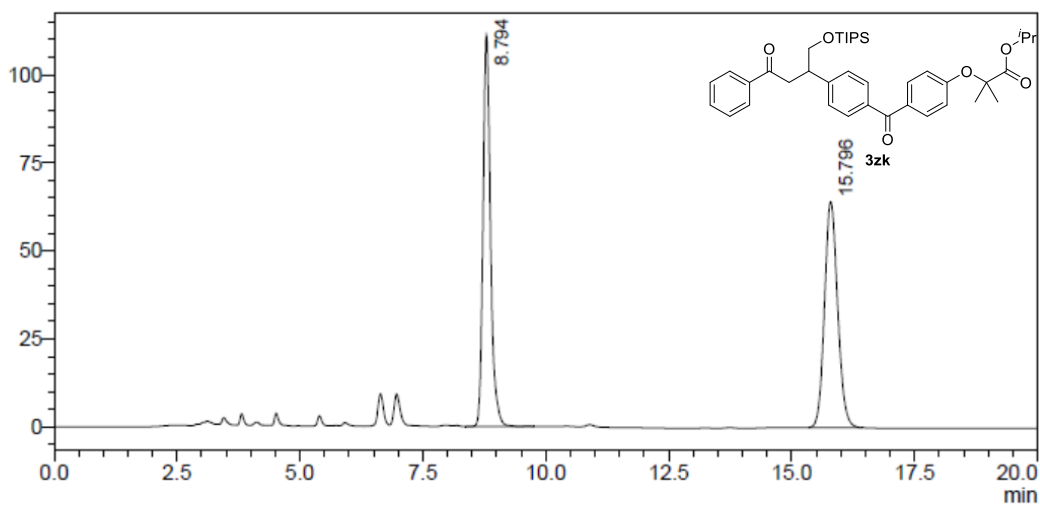

<Peak Table>

A 254nm

| Peak# | Ret. Time | Area    | Height | Area%   |
|-------|-----------|---------|--------|---------|
| 1     | 8.794     | 1183203 | 111154 | 49.843  |
| 2     | 15.796    | 1190678 | 64116  | 50.157  |
|       |           | 2373881 | 175270 | 100.000 |

mV

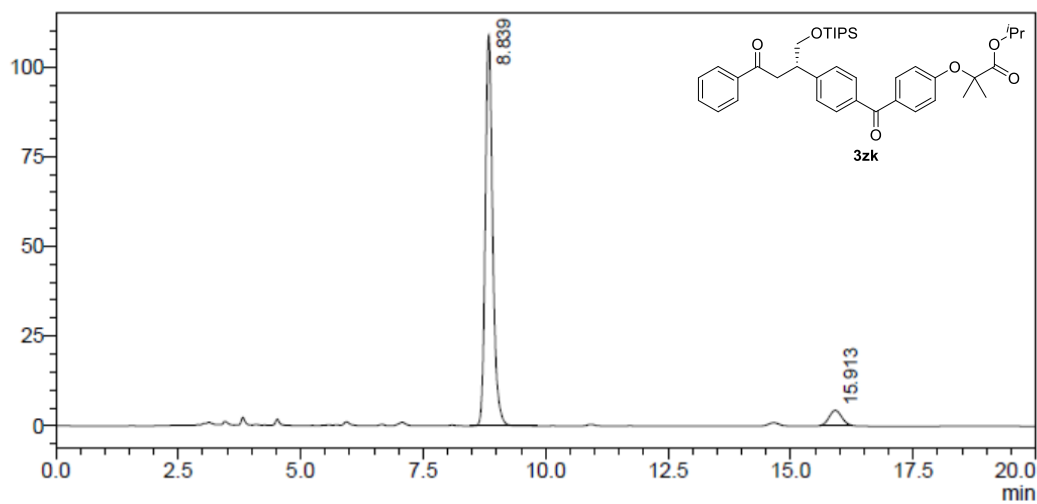

<Peak Table>

A 254nm

| Peak# | Ret. Time | Area    | Height | Area%   |
|-------|-----------|---------|--------|---------|
| 1     | 8.839     | 1150357 | 108974 | 93.959  |
| 2     | 15.913    | 73966   | 4226   | 6.041   |
|       |           | 1224324 | 113199 | 100.000 |

mV

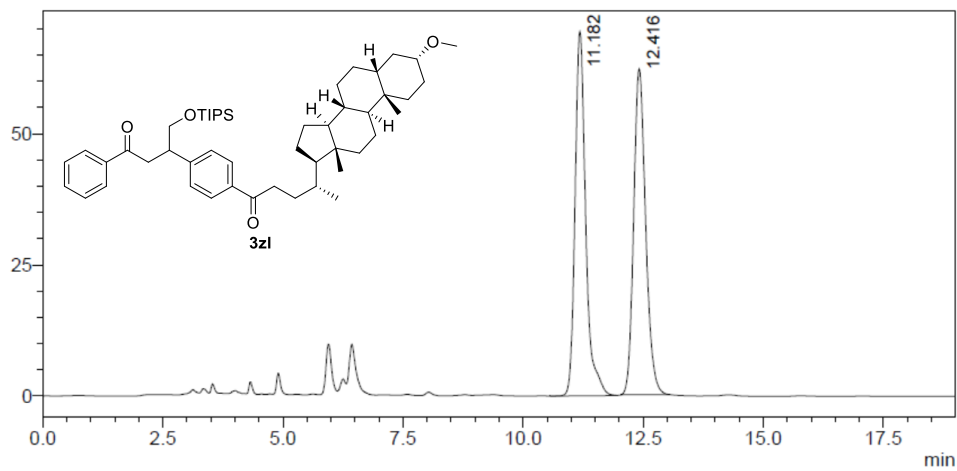

<Peak Table>

A 254nm

| Peak# | Ret. Time | Area    | Height | Area%   |
|-------|-----------|---------|--------|---------|
| 1     | 11.182    | 1072849 | 69502  | 49.906  |
| 2     | 12.416    | 1076910 | 62081  | 50.094  |
|       |           | 2149759 | 131583 | 100.000 |

mV

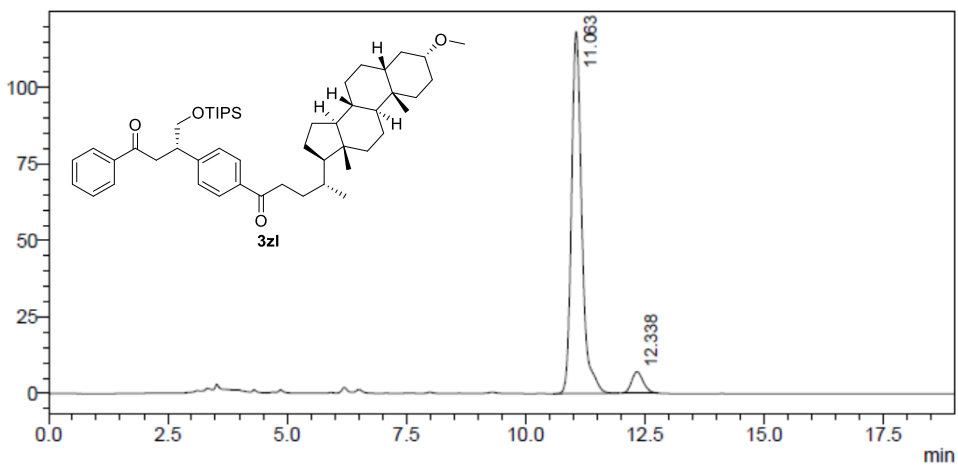

<Peak Table>

A 254nm

| Peak# | Ret. Time | Area    | Height | Area%   |
|-------|-----------|---------|--------|---------|
| 1     | 11.063    | 1779124 | 118203 | 93.852  |
| 2     | 12.338    | 116552  | 6941   | 6.148   |
|       |           | 1895677 | 125145 | 100.000 |

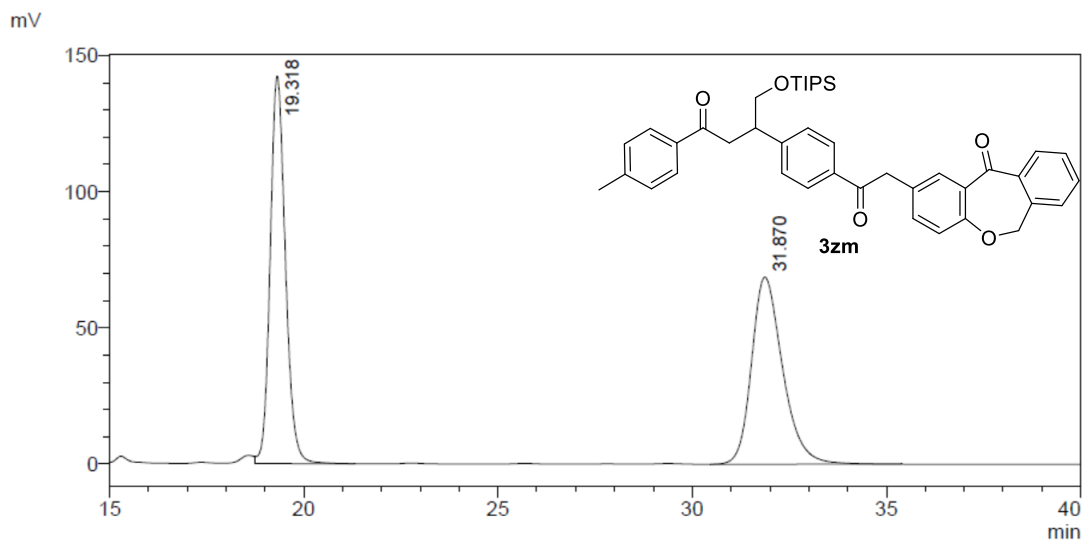

<Peak Table>

A 254nm

| Peak# | Ret. Time | Area    | Height | Area%   |
|-------|-----------|---------|--------|---------|
| 1     | 19.318    | 3873175 | 142220 | 50.267  |
| 2     | 31.870    | 3832028 | 68672  | 49.733  |
|       |           | 7705203 | 210892 | 100.000 |

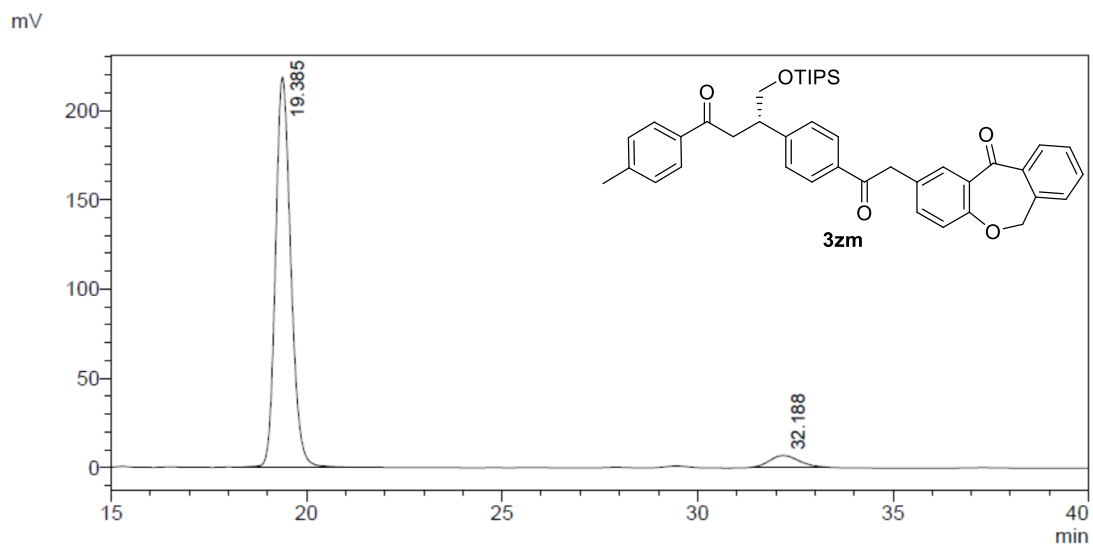

<Peak Table>

A 254nm

| Peak# | Ret. Time | Area    | Height | Area%   |
|-------|-----------|---------|--------|---------|
| 1     | 19.385    | 5947846 | 218442 | 94.619  |
| 2     | 32.188    | 338264  | 6581   | 5.381   |
|       |           | 6286110 | 225022 | 100.000 |

Large-scale of **3a**:

mV

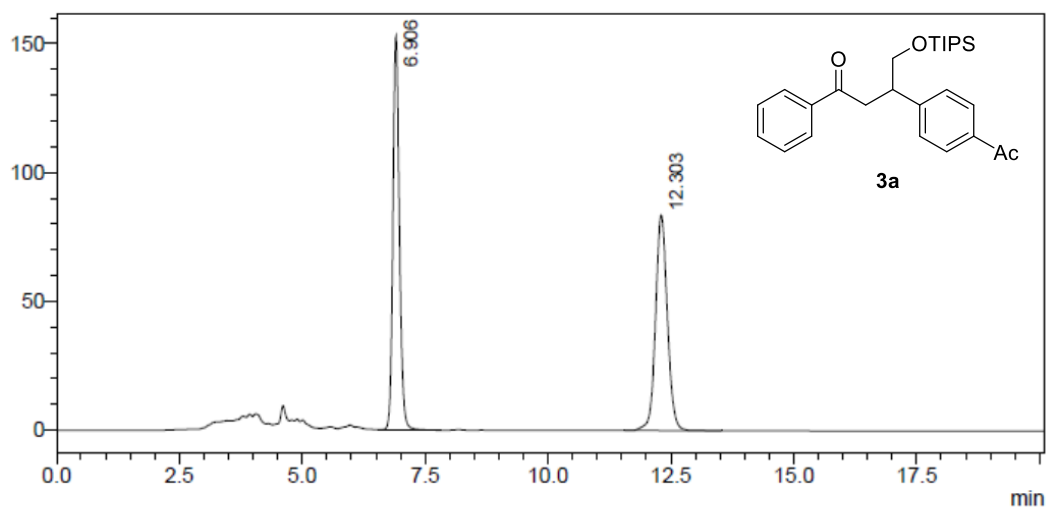

<Peak Table>

A 254nm

| Peak# | Ret. Time | Area    | Height | Area%   |
|-------|-----------|---------|--------|---------|
| 1     | 6.906     | 1411282 | 152924 | 50.138  |
| 2     | 12.303    | 1403533 | 83621  | 49.862  |
|       |           | 2814815 | 236544 | 100.000 |

mV

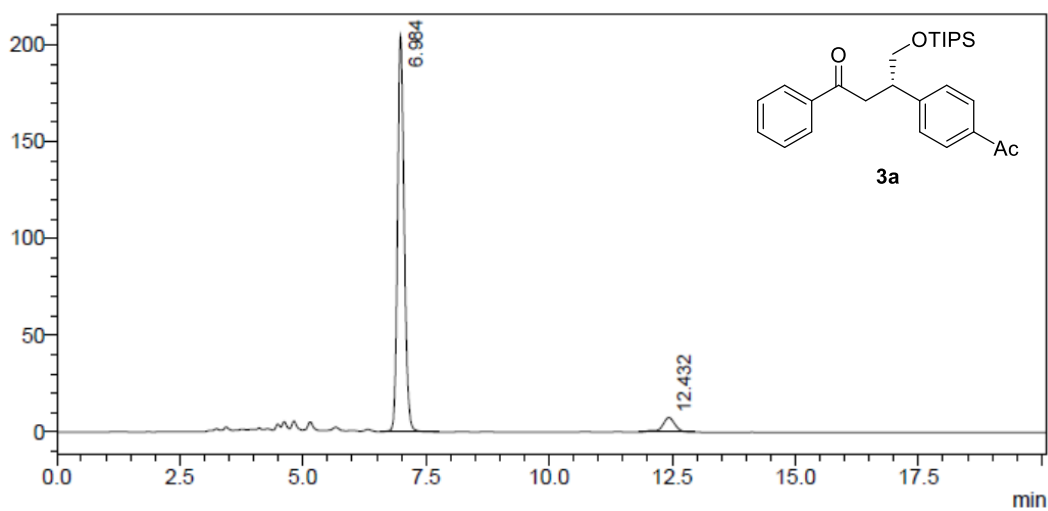

<Peak Table>

A 254nm

| Peak# | Ret. Time | Area    | Height | Area%   |
|-------|-----------|---------|--------|---------|
| 1     | 6.984     | 1926758 | 204303 | 93.383  |
| 2     | 12.432    | 136528  | 7542   | 6.617   |
|       |           | 2063285 | 211845 | 100.000 |

mV

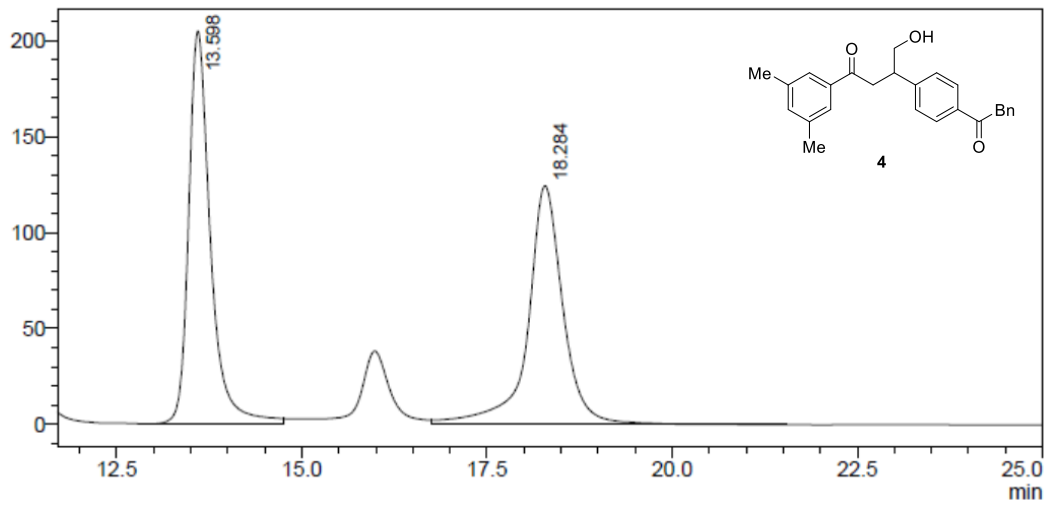

<Peak Table>

A 254nm

| Peak# | Ret. Time | Area    | Height | Area%   |
|-------|-----------|---------|--------|---------|
| 1     | 13.598    | 4197547 | 204503 | 50.093  |
| 2     | 18.284    | 4181912 | 124487 | 49.907  |
|       |           | 8379459 | 328990 | 100.000 |

mV

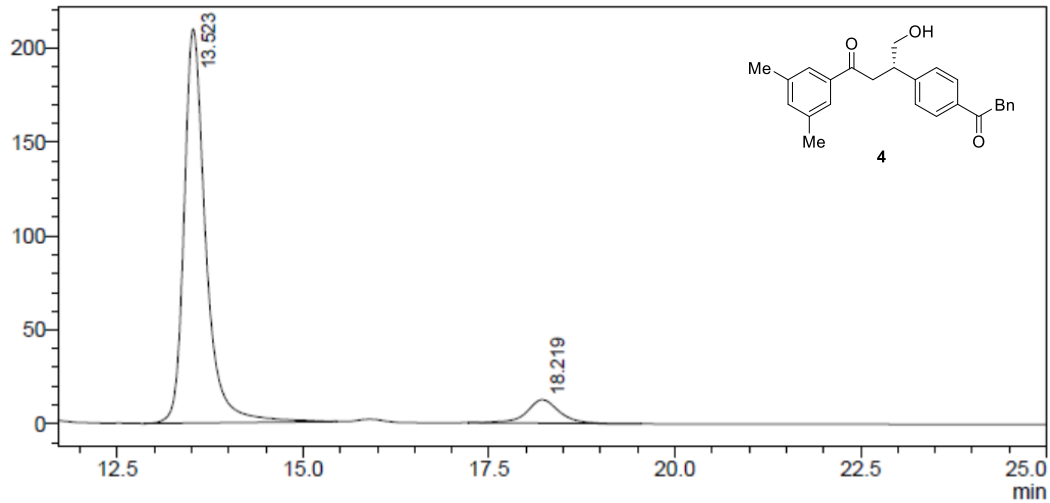

<Peak Table>

A 254nm

| Peak# | Ret. Time | Area    | Height | Area%   |
|-------|-----------|---------|--------|---------|
| 1     | 13.523    | 4246260 | 209683 | 91.733  |
| 2     | 18.219    | 382659  | 12474  | 8.267   |
|       |           | 4628919 | 222157 | 100.000 |



mV

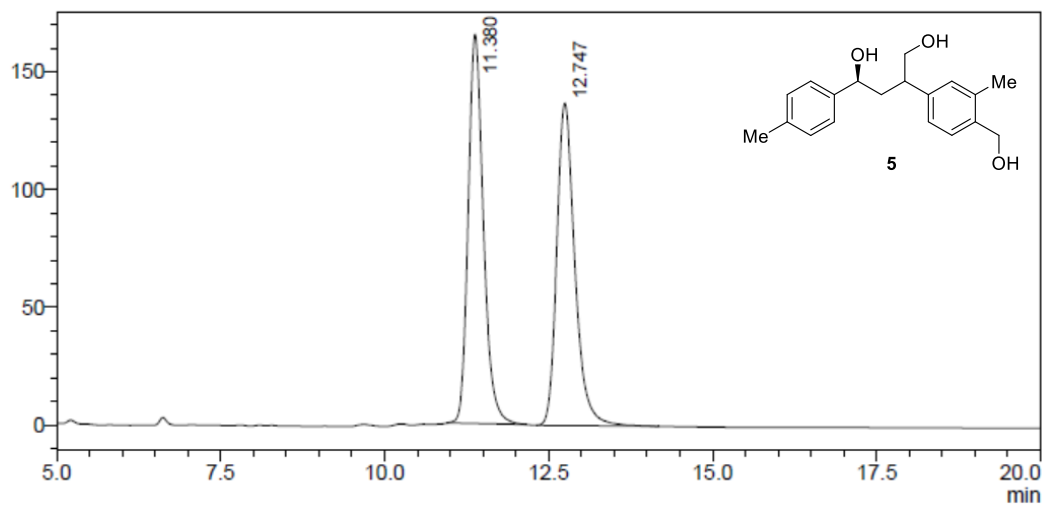

<Peak Table>

| Peak# | Ret. Time | Area    | Height | Area%   |
|-------|-----------|---------|--------|---------|
| 1     | 11.380    | 2664674 | 164964 | 50.392  |
| 2     | 12.747    | 2623191 | 136592 | 49.608  |
|       |           | 5287865 | 301556 | 100.000 |

mV

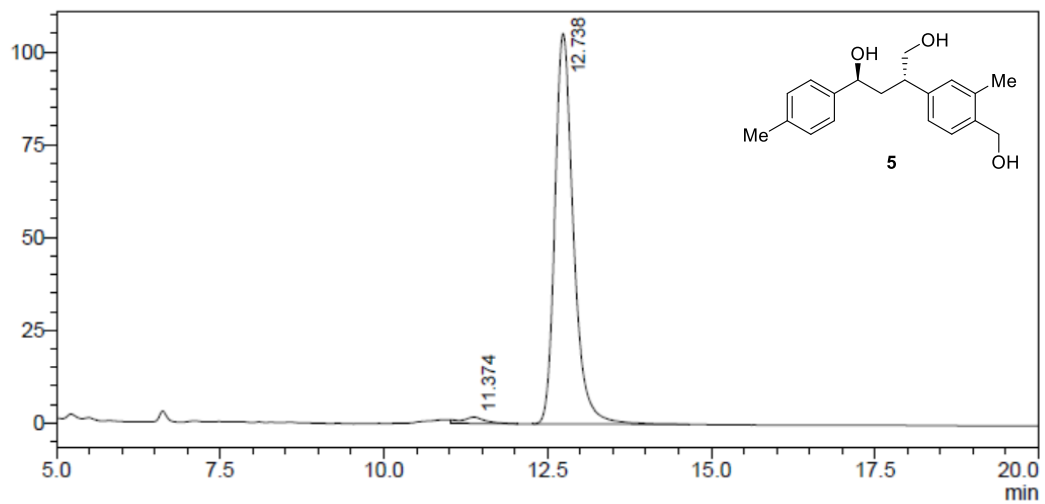

<Peak Table>

| Peak# | Ret. Time | Area    | Height | Area%   |
|-------|-----------|---------|--------|---------|
| 1     | 11.374    | 43405   | 1725   | 2.043   |
| 2     | 12.738    | 2080926 | 105299 | 97.957  |
|       |           | 2124331 | 107024 | 100.000 |

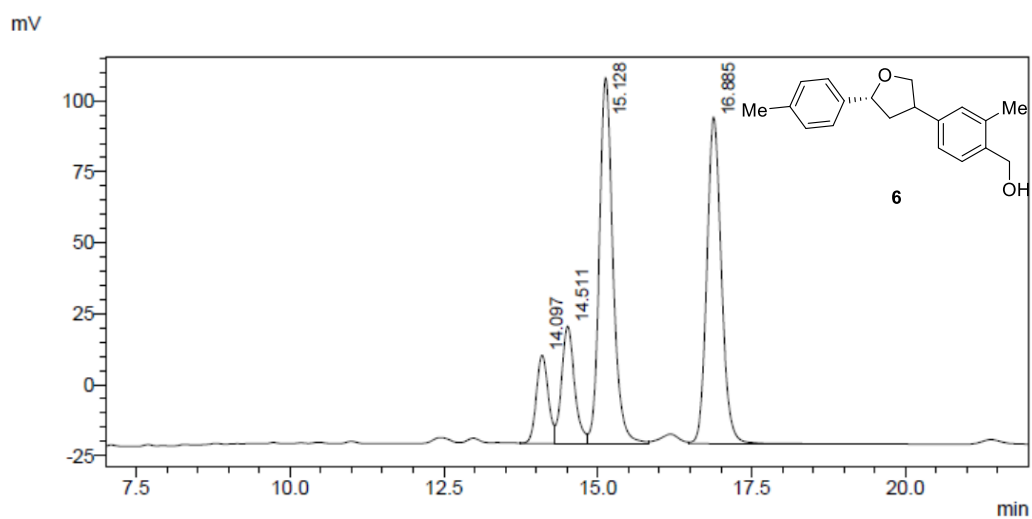

<Peak Table>

A 210nm

| Peak# | Ret. Time | Area    | Height | Area%   |
|-------|-----------|---------|--------|---------|
| 1     | 14.097    | 421090  | 31120  | 8.582   |
| 2     | 14.511    | 607099  | 41327  | 12.374  |
| 3     | 15.128    | 1985849 | 128872 | 40.474  |
| 4     | 16.885    | 1892410 | 114983 | 38.570  |
|       |           | 4906447 | 316302 | 100.000 |

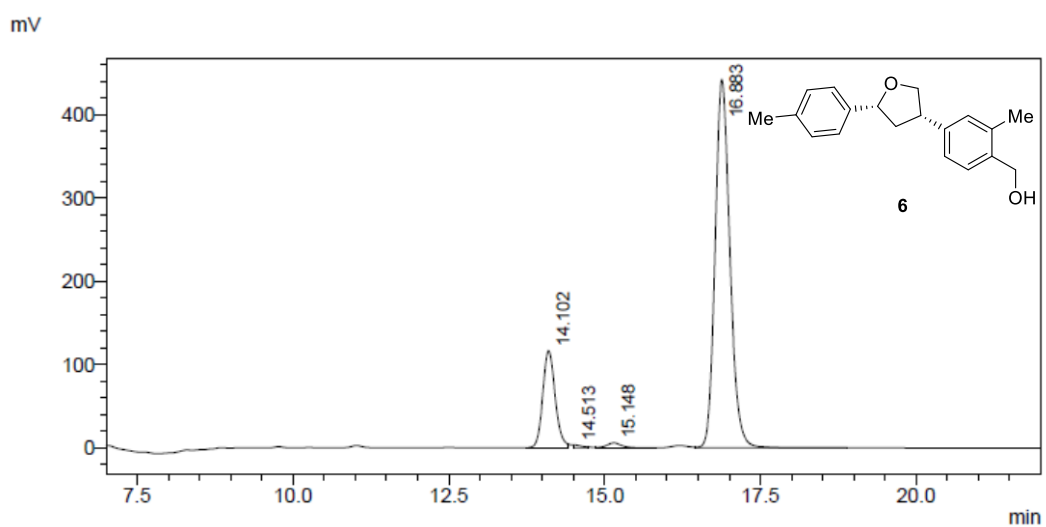

<Peak Table>

210nm

| Peak# | Ret. Time | Area    | Height | Area%   |
|-------|-----------|---------|--------|---------|
| 1     | 14.102    | 1616945 | 116504 | 17.840  |
| 2     | 14.513    | 26203   | 3470   | 0.289   |
| 3     | 15.148    | 90729   | 5770   | 1.001   |
| 4     | 16.883    | 7329863 | 442142 | 80.870  |
|       |           | 9063739 | 567886 | 100.000 |

mV

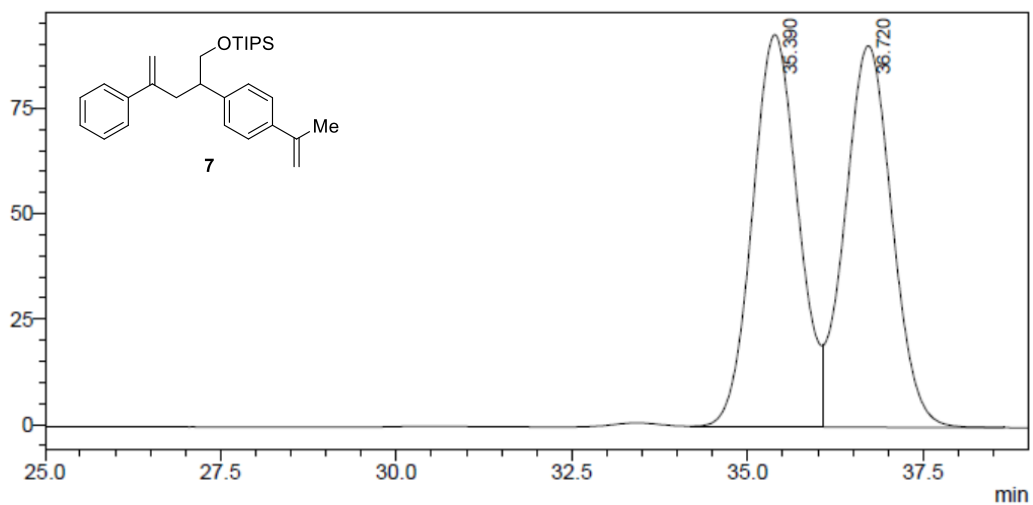

<Peak Table>

A 254nm

| Peak# | Ret. Time | Area    | Height | Area%   |
|-------|-----------|---------|--------|---------|
| 1     | 35.390    | 4236074 | 93067  | 50.016  |
| 2     | 36.720    | 4233371 | 90460  | 49.984  |
|       |           | 8469445 | 183527 | 100.000 |

mV

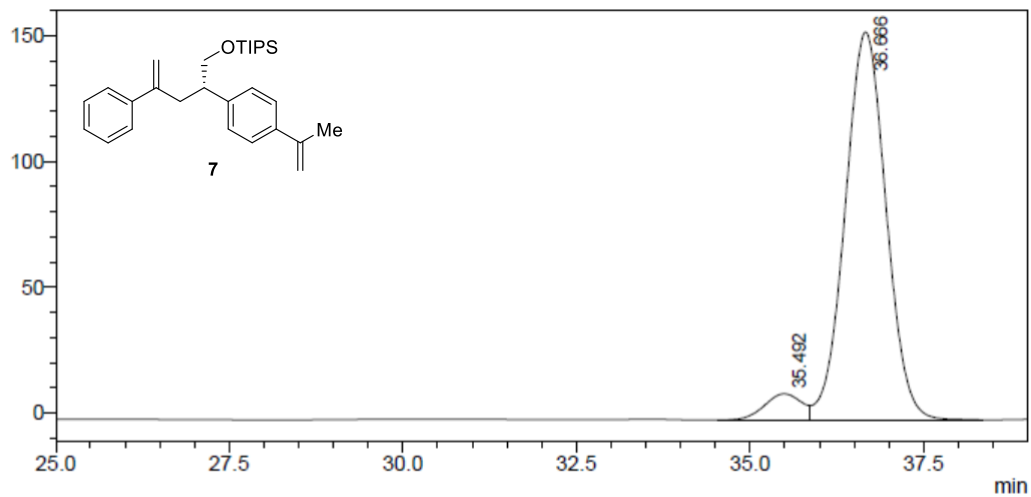

<Peak Table>

A 254nm

| Peak# | Ret. Time | Area    | Height | Area%   |
|-------|-----------|---------|--------|---------|
| 1     | 35.492    | 386936  | 10384  | 5.761   |
| 2     | 36.666    | 6329895 | 154239 | 94.239  |
|       |           | 6716831 | 164622 | 100.000 |

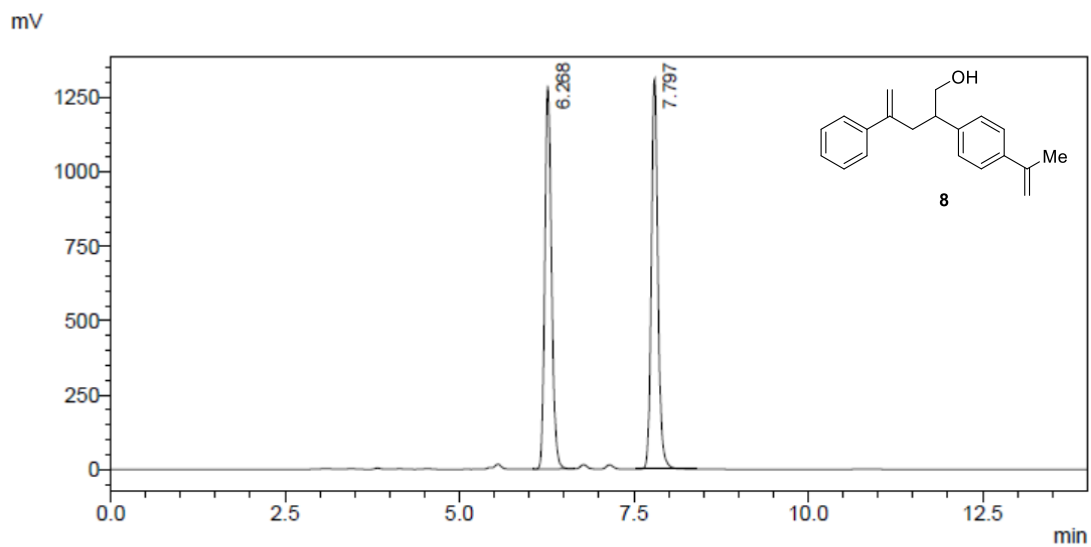

<Peak Table>

254nm

| Peak# | Ret. Time | Area     | Height  | Area%   |
|-------|-----------|----------|---------|---------|
| 1     | 6.268     | 8656691  | 1289311 | 50.044  |
| 2     | 7.797     | 8641330  | 1313355 | 49.956  |
|       |           | 17298021 | 2602666 | 100.000 |

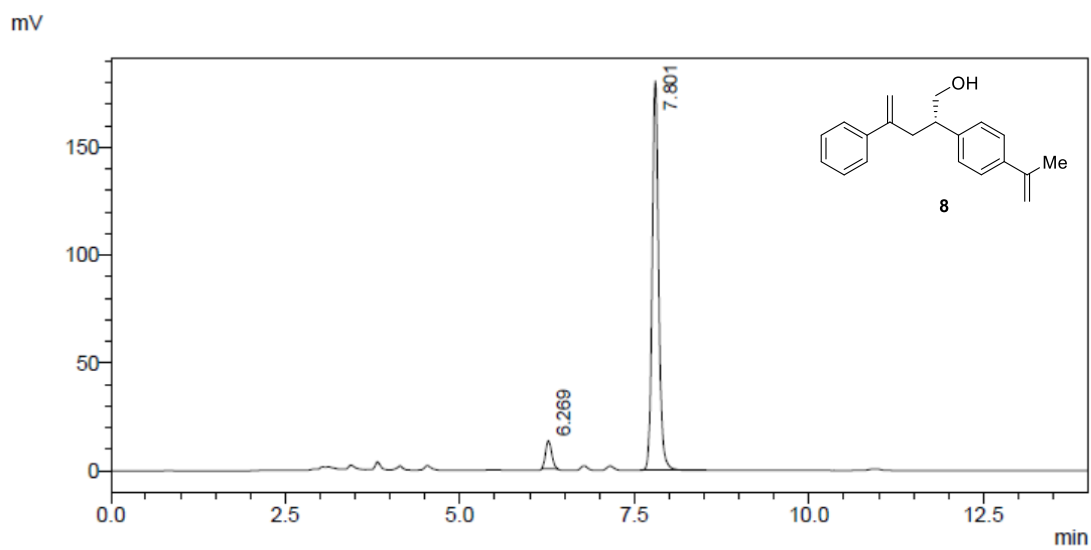

<Peak Table>

254nm

| Peak# | Ret. Time | Area    | Height | Area%   |
|-------|-----------|---------|--------|---------|
| 1     | 6.269     | 78656   | 12865  | 6.337   |
| 2     | 7.801     | 1162479 | 180810 | 93.663  |
|       |           | 1241136 | 193676 | 100.000 |

mV

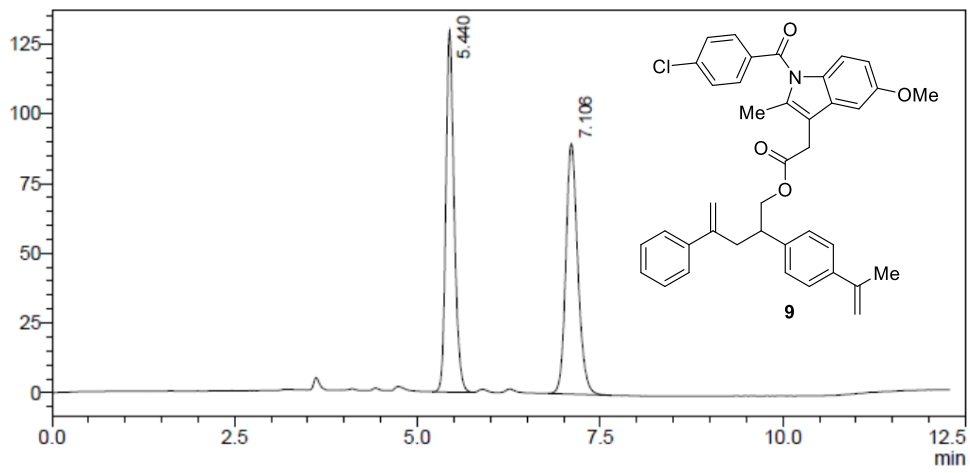

<Peak Table>

A 254nm

| Peak# | Ret. Time | Area    | Height | Area%   |
|-------|-----------|---------|--------|---------|
| 1     | 5.440     | 1023452 | 129478 | 50.090  |
| 2     | 7.106     | 1019759 | 89763  | 49.910  |
|       |           | 2043211 | 219241 | 100.000 |

mV

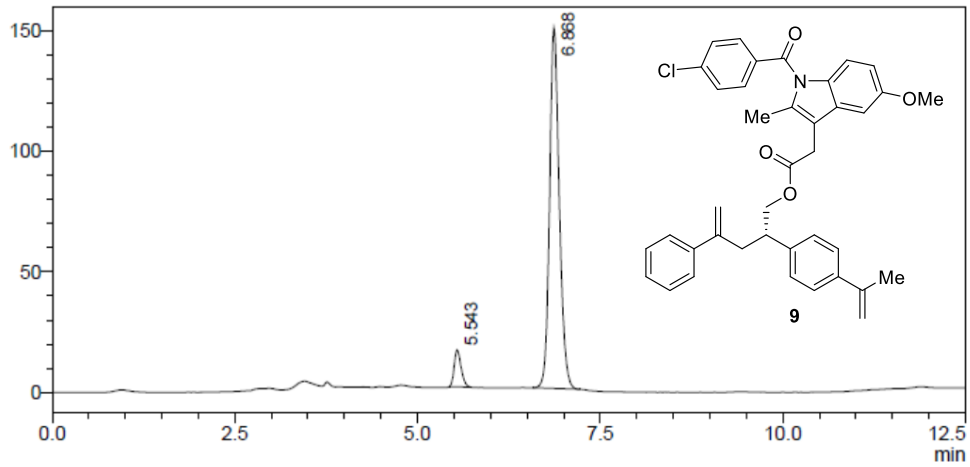

<Peak Table>

A 254nm

| Peak# | Ret. Time | Area    | Height | Area%   |
|-------|-----------|---------|--------|---------|
| 1     | 5.543     | 100592  | 15376  | 6.769   |
| 2     | 6.868     | 1385533 | 149776 | 93.231  |
|       |           | 1486126 | 165152 | 100.000 |

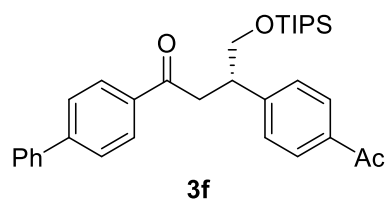

generated from *cis*-isomer of

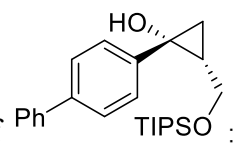

mV

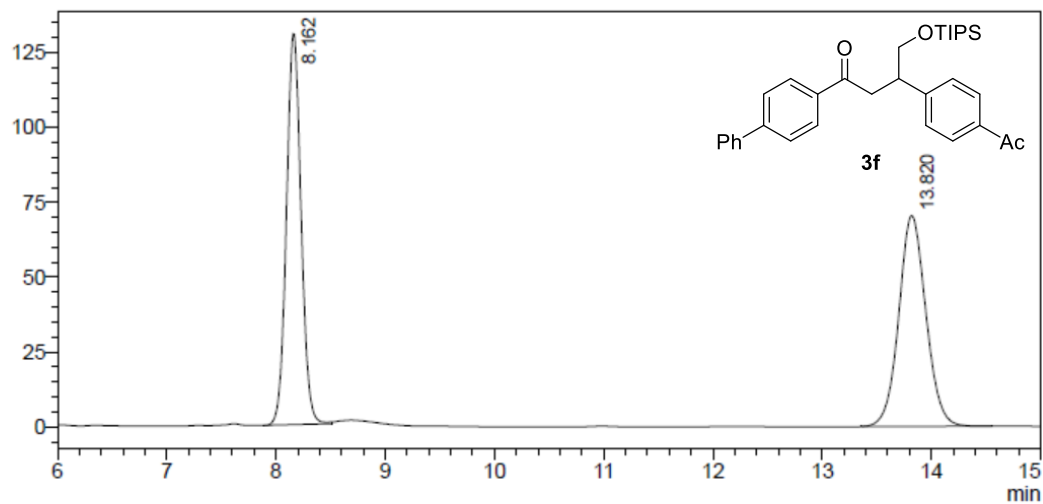

<Peak Table>

A 254nm

| Peak# | Ret. Time | Area    | Height | Area%   |
|-------|-----------|---------|--------|---------|
| 1     | 8.162     | 1219362 | 130718 | 50.055  |
| 2     | 13.820    | 1216700 | 70404  | 49.945  |
|       |           | 2436062 | 201123 | 100.000 |

mV

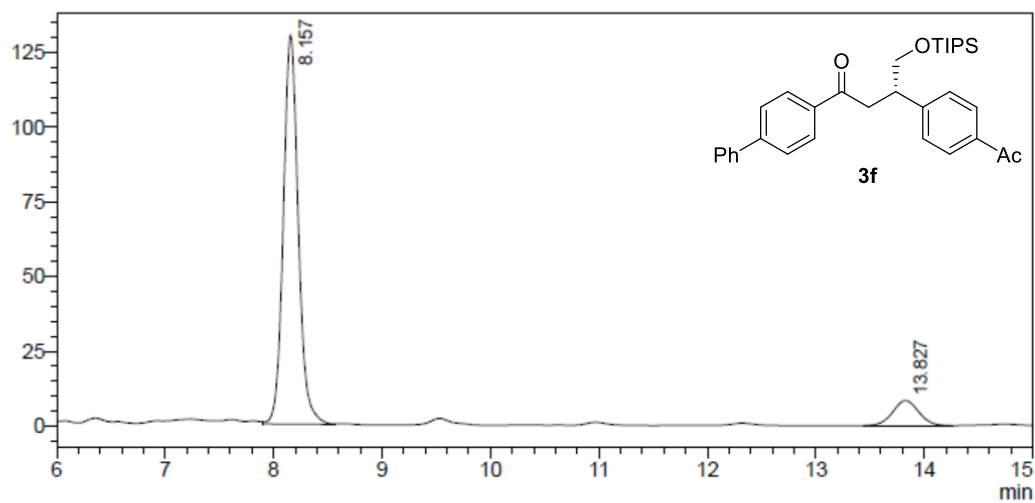

<Peak Table>

A 254nm

| Peak# | Ret. Time | Area    | Height | Area%   |
|-------|-----------|---------|--------|---------|
| 1     | 8.157     | 1250010 | 130328 | 89.977  |
| 2     | 13.827    | 139248  | 8378   | 10.023  |
|       |           | 1389257 | 138706 | 100.000 |

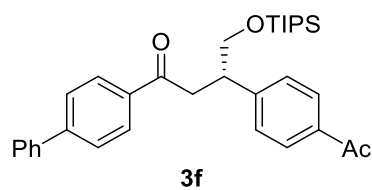

generated from *trans*-isomer of

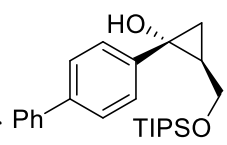

mV

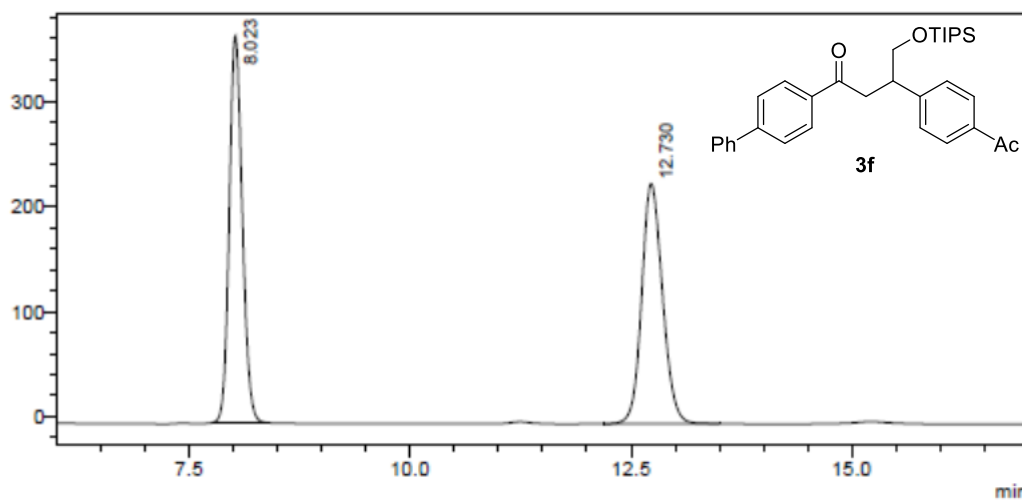

<Peak Table>

A 254nm

| Peak# | Ret. Time | Area    | Height | Area%   |
|-------|-----------|---------|--------|---------|
| 1     | 8.023     | 3775683 | 368427 | 50.146  |
| 2     | 12.730    | 3753690 | 228595 | 49.854  |
|       |           | 7529373 | 597022 | 100.000 |

mV

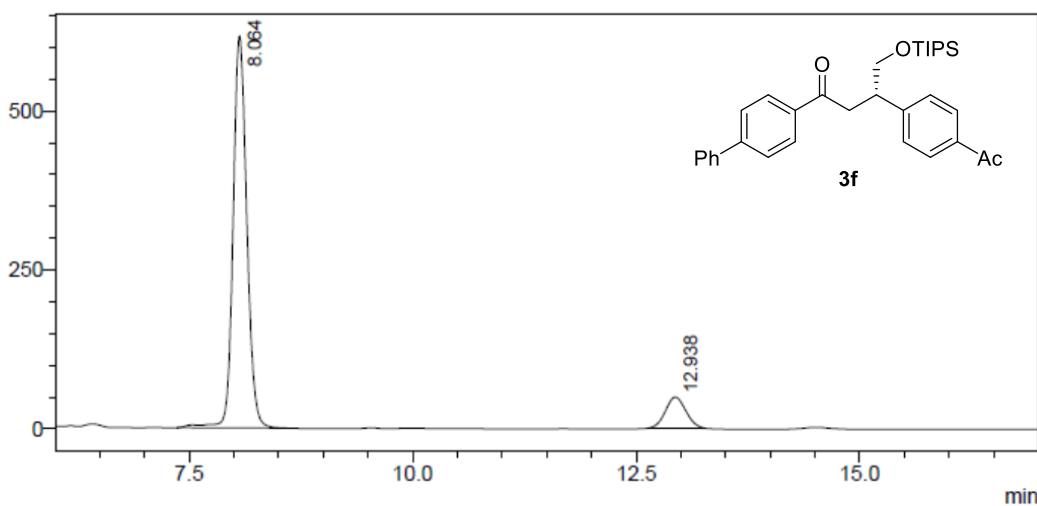

<Peak Table>

A 254nm

| Peak# | Ret. Time | Area    | Height | Area%   |
|-------|-----------|---------|--------|---------|
| 1     | 8.064     | 6565869 | 615823 | 89.636  |
| 2     | 12.938    | 759146  | 48293  | 10.364  |
|       |           | 7325015 | 664116 | 100.000 |
